# Supplementary material
Source: publisher site journal article supplement (https://www.dovepress.com/article/492420)
Supplement: Supplementary file 1 [file get_supplementary_file.php]

**Supplementary Material**

**Experimental methods**

**2.1 Data source and preprocessing**

The protocol for the study is illustrated in Figure 1. The bulk-seq data and clinical data were obtained from UCSC Xena (https://xena.ucsc.edu/). The transcriptome data of normal tissues were extracted from the GTEx database (https://www.gtexportal.org/). The "limma" package was used to preprocess the transcriptomic data. Gene sets for gene set enrichment analysis (GSEA) and single-sample gene set enrichment analysis (ssGSEA) were obtained from the Molecular Signatures Database (MSigDB) (https://www.gsea-msigdb.org/). Copy number variation (CNV) data, somatic single-nucleotide variant (SNV) data and DNA methylation data were acquired from the TCGA (https://portal.gdc.cancer.gov/).

**2.2 Identification of PPIH expression in pancancer**

Our study used the TIME2 database (http://timer.cistrome.org/) to determine how PPIH is expressed in tumour tissue and adjacent normal tissue. Differential expression of PPIH in TCGA tumour specimens and GTEx normal tissues was analysed. The protein expression profile of PPIH was analysed using CPTAC (https://ualcan.path.uab.edu/analysis-prot.html). Based on the median value of PPIH expression, we classified the TCGA cohort into low- and high-PPIH groups and then calculated the differences in PPIH expression at different pathological stages.

**2.3 Prognostic analysis of PPIH**

In the low- and high-PPIH groups, differences in the overall survival (OS), progression-free interval (PFI), disease-specific survival (DSS) and disease-free interval (DFI) were evaluated. Survival analysis results were visualized using the “survminer” and “forestplot” packages.

**2.4 Annotation of biological characterization**

Three algorithms, namely, CIBERSORT, Quanti-seq, and ssGSEA, were employed to infer the immunoinfiltration score. ssGSEA was performed using the indicated markers (Table S1) to assess the abundance of 24 immune cell types, including 18 T-cell subtypes. GSEA was performed using "c2.cp.kegg_legacy.v2023.2.Hs.entrez.gmt" as the reference gene set. Published tumour-associated gene sets (Tables S2, 3) were used for ssGSEA, and enrichment scores were analysed for correlation with PPIH expression. We used Gistic 2.0 (www.cloud.genepattern.org) to analyse CNV data for the TCGA-HCC cohort.

**2.5 Integrated analysis of DNA methylation data and SNV data**

Methylation data from the TCGA-HCC cohort were analysed for differences (*P* <0.05 and |logFC|>2). PPIH methylation was analysed using MExpress (https://mexpress.ugent.be/). Somatic mutation data were analysed using the "maftools" R package.

**2.4 RNA isolation and qRT‒PCR**

Total RNA was extracted from transfected cells using an EasyPure RNA Kit (TransGen Biotech (TransGen, China)), and RT‒PCR was performed using EasyTaq PCR SuperMix (TransGen, China). The sequences of the human and mouse PPIH primers used were listed as follow:

| Forward Primer-Homo -PPIH | ATGGCGGTGGCAAATTCAAG |
| --- | --- |
| Reverse Primer-Homo -PPIH | GGCACAACGTCTGCAAAGAG |
| Forward Primer-Mus-PPIH | AAGTCCAGTCAATCCAGTGGT |
| Reverse Primer-Mus-PPIH | CGGTGCAGAATTGCCTAAAGT |

**2.7 Cell transfection**

For transduction, lentivirus (Hanheng Biotechnology, China) was applied to the cells for 24 hours, followed by puromycin selection for 24 hours after lentiviral treatment. Hepa1-6 and HCCLM3 cells were transfected with lentivirus at a multiplicity of infection (MOI) of 20, and HepG2 and MHCC97h cells were transfected at an MOI of 10. We assessed expression stability via PCR and Western blotting. The shRNA sequences used against the human or mouse PPIH target sequences are listed below:

| Human | 5’-CCGGGTGTTCTTTGATGTCAGTATTTTCAAGAGAAATACTGACATCAAAGAACACTTTTTTGGTACC-3’ |
| --- | --- |
| Human | 5’-CCGGCGAACAGTGGTCCAAGTACAATTCAAGAGATTGTACTTGGACCACTGTTCGTTTTTTGGTACC-3’ |
| Human | 5’-CCGGGTGATGAGAAAGATTGAGAATTTCAAGAGACGAACAGTGGTCCAAGTACAATTTTTTGGTACC-3’ |
| mouse | 5’-GATCCGCGGCAGAGAACTTTAGGCAATctcgagATTGCCTAAAGTTCTCTGCCGTTTTTTG-3’ |
| mouse | 5’-GATCCGCCAGTTCTTTATCACGTGTTctcgagAACACGTGATAAAGAACTGGCTTTTTTG-3’ |
| mouse | 5’-GATCCGCGGACTTCTAGTGATGAGGAActcgagTTCCTCATCACTAGAAGTCCGTTTTTTG-3’ |

**2.5 Western blotting**

Proteasome and phosphatase inhibitor cocktails (Keygen, Nanjing, China) were added to RIPA buffer (Beyotime, China) after the cells were extracted. The Lowry protein assay was used to detect the total protein concentration, and Western blotting was subsequently performed using routine methods.

The blots were treated with anti-PPIH (1:1000) (Proteintech, China) and anti-beta-actin (1:1000) (CST, USA) antibodies.

**2.6 Wound healing assay**

An aliquot of 1×106 cells was plated in different wells of a six-well plate in RPMI-1640 supplemented with 2% FBS. A scratch was created with a 200-μl pipette tip. Micrographs were captured at 0 h, 24 h, and 48 h.

**2.7 Transwell assays**

Transwell migration and invasion assays were performed using HCC cells cultured in 200 L of serum-free DMEM. A 10% foetal bovine serum solution was added to the bottom chamber. The cells in the chamber were fixed for 15 minutes and stained for 24 hours with 0.1% crystal violet. Optical microscopy was used to count the total and blue-stained HCC cells.

**2.8 Apoptosis assay**

Following the manufacturer's instructions, the FITC-Annexin V Apoptosis Detection Kit (KeyGEN BioTECH, KGA108) was used to measure apoptosis. After the cells were harvested and rinsed twice in PBS, they were resuspended in PI/Annexin-V solution. Using FlowJo software, data analysis was performed on at least 10,000 cells on a BD LSRFortessa (BD Biosciences).

**2.9 Immunofluorescence and Immunohistochemistry**

Immunofluorescence and immunohistochemistry were performed as previously described [1-3]. The tissue was washed in cold PBS, fixed with 4% formaldehyde solution for 2 h at 4 °C, and embedded in paraffin. After deparaffinizing and rehydrating the paraffin-embedded sections, antigens were retrieved. After the sections were blocked in 3% BSA for 1 hour, they were incubated overnight with the primary antibody diluted in 3% BSA (anti-PPIH: 1/50 (Proteintech, China)). We used ImmpactDAB substrate for immunohistochemistry with fluorophore-conjugated secondary antibodies from Invitrogen. For the immunofluorescence assay, an anti-IL-17 antibody was used as the primary antibody (anti-IL-17 antibody: 1/50 (Abcam, UK)). The secondary antibodies used for detection and labelling were rabbit IgG (H + L)-conjugated antibodies.

**2.10 Live animal imaging**

For tumour growth monitoring, an IVIS Spectrum In Vivo Imaging System (PerkinElmer) was used to image the hair on the 3rd, 9th, 12th, and 18th days. After cell injection, the hair was removed, and a PBS solution containing 3 mg/mouse D-luciferin (Sigma, USA) was injected into each mouse. All the mice were weighed, and the major axis and minor axis of the subcutaneous tumours were measured every 6 days. The survival of the mice was recorded daily.

**2.11 Flow cytometry**

Flow cytometry data were acquired as described previously[2]. The tumour tissue was freshly collected from the mice after they were sacrificed and processed for flow cytometry. By disintegrating tumours and rubbing them against the mesh, we obtained tumour-infiltrating lymphocytes by adding 3 mL of enzymatic hydrolysate medium (supplemented with collagenase I or DNase I). After the suspended cells were washed twice with cell staining buffer and assessed using a BD LSRFortessa (BD Biosciences) equipped with anti-mouse CD45, CD4, CD25 and IL-17 antibodies, the numbers of Tregs and Th17 cells were determined. The percentages of various lymphocytes were determined using a BD FACSCanto II flow cytometry system (BD Biosciences).

**2.12 Transcriptomic analysis**

Tumor tissue samples were collected immediately after the subcutaneous tumor-bearing mice were sacrificed, and flash-frozen in liquid nitrogen. The subsequent total RNA isolation, library preparation and high-throughput RNA-sequencing were processed by Applied Protein Technology Co., Ltd (Shanghai, China). The OmicShare tool (https://www.omicshare.com/tools), an efficient online platform, was used for analysis of transcriptomic data.

**References**

[1] Bei J, Chen Y, Zhang Q, et al. HBV suppresses macrophage immune responses by impairing the TCA cycle through the induction of CS/PDHC hyperacetylation[J]. Hepatol Commun,2023,7(11).

[2] Chen Y, Bei J, Chen M, et al. Intratumoral Lactate Depletion Based on Injectable Nanoparticles-Hydrogel Composite System Synergizes with Immunotherapy against Postablative Hepatocellular Carcinoma Recurrence[J]. Adv Healthc Mater,2024,13(6):e2303031.

[3] Chen Y, Bei J, Liu M, et al. Sublethal heat stress-induced O-GlcNAcylation coordinates the Warburg effect to promote hepatocellular carcinoma recurrence and metastasis after thermal ablation[J]. Cancer Lett,2021,518:23-34.

**Figure legend**

**
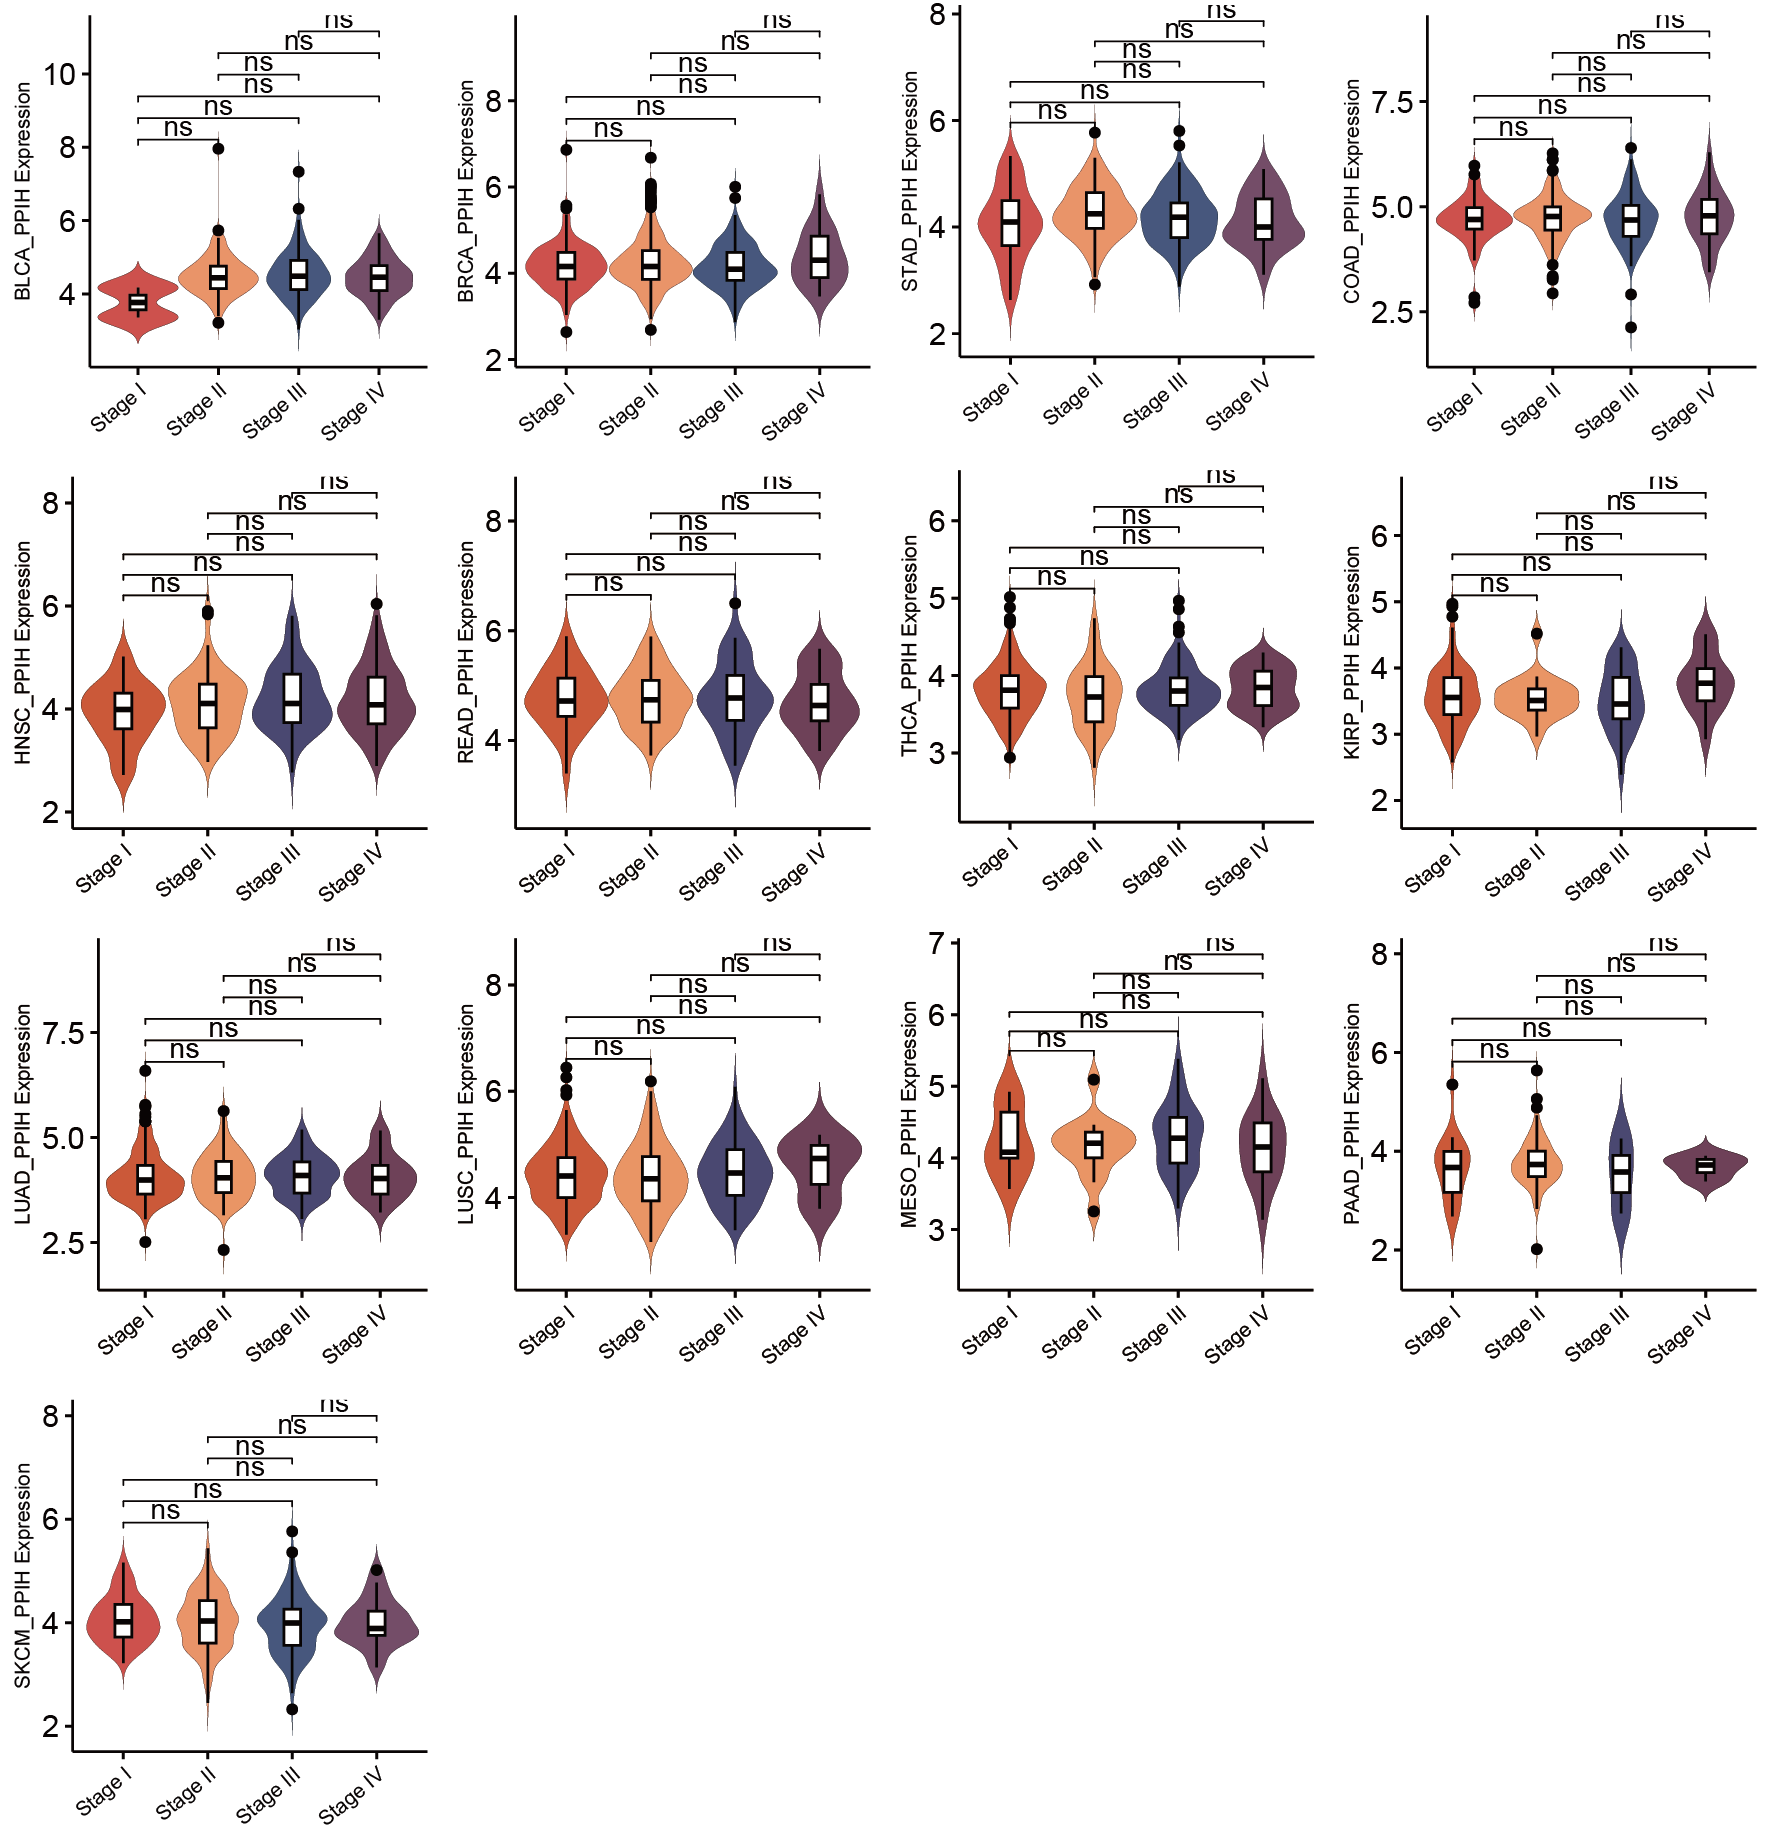
Supplementary Figure 1.** Differences in PPIH expression between different pathological stages of different cancers.

**
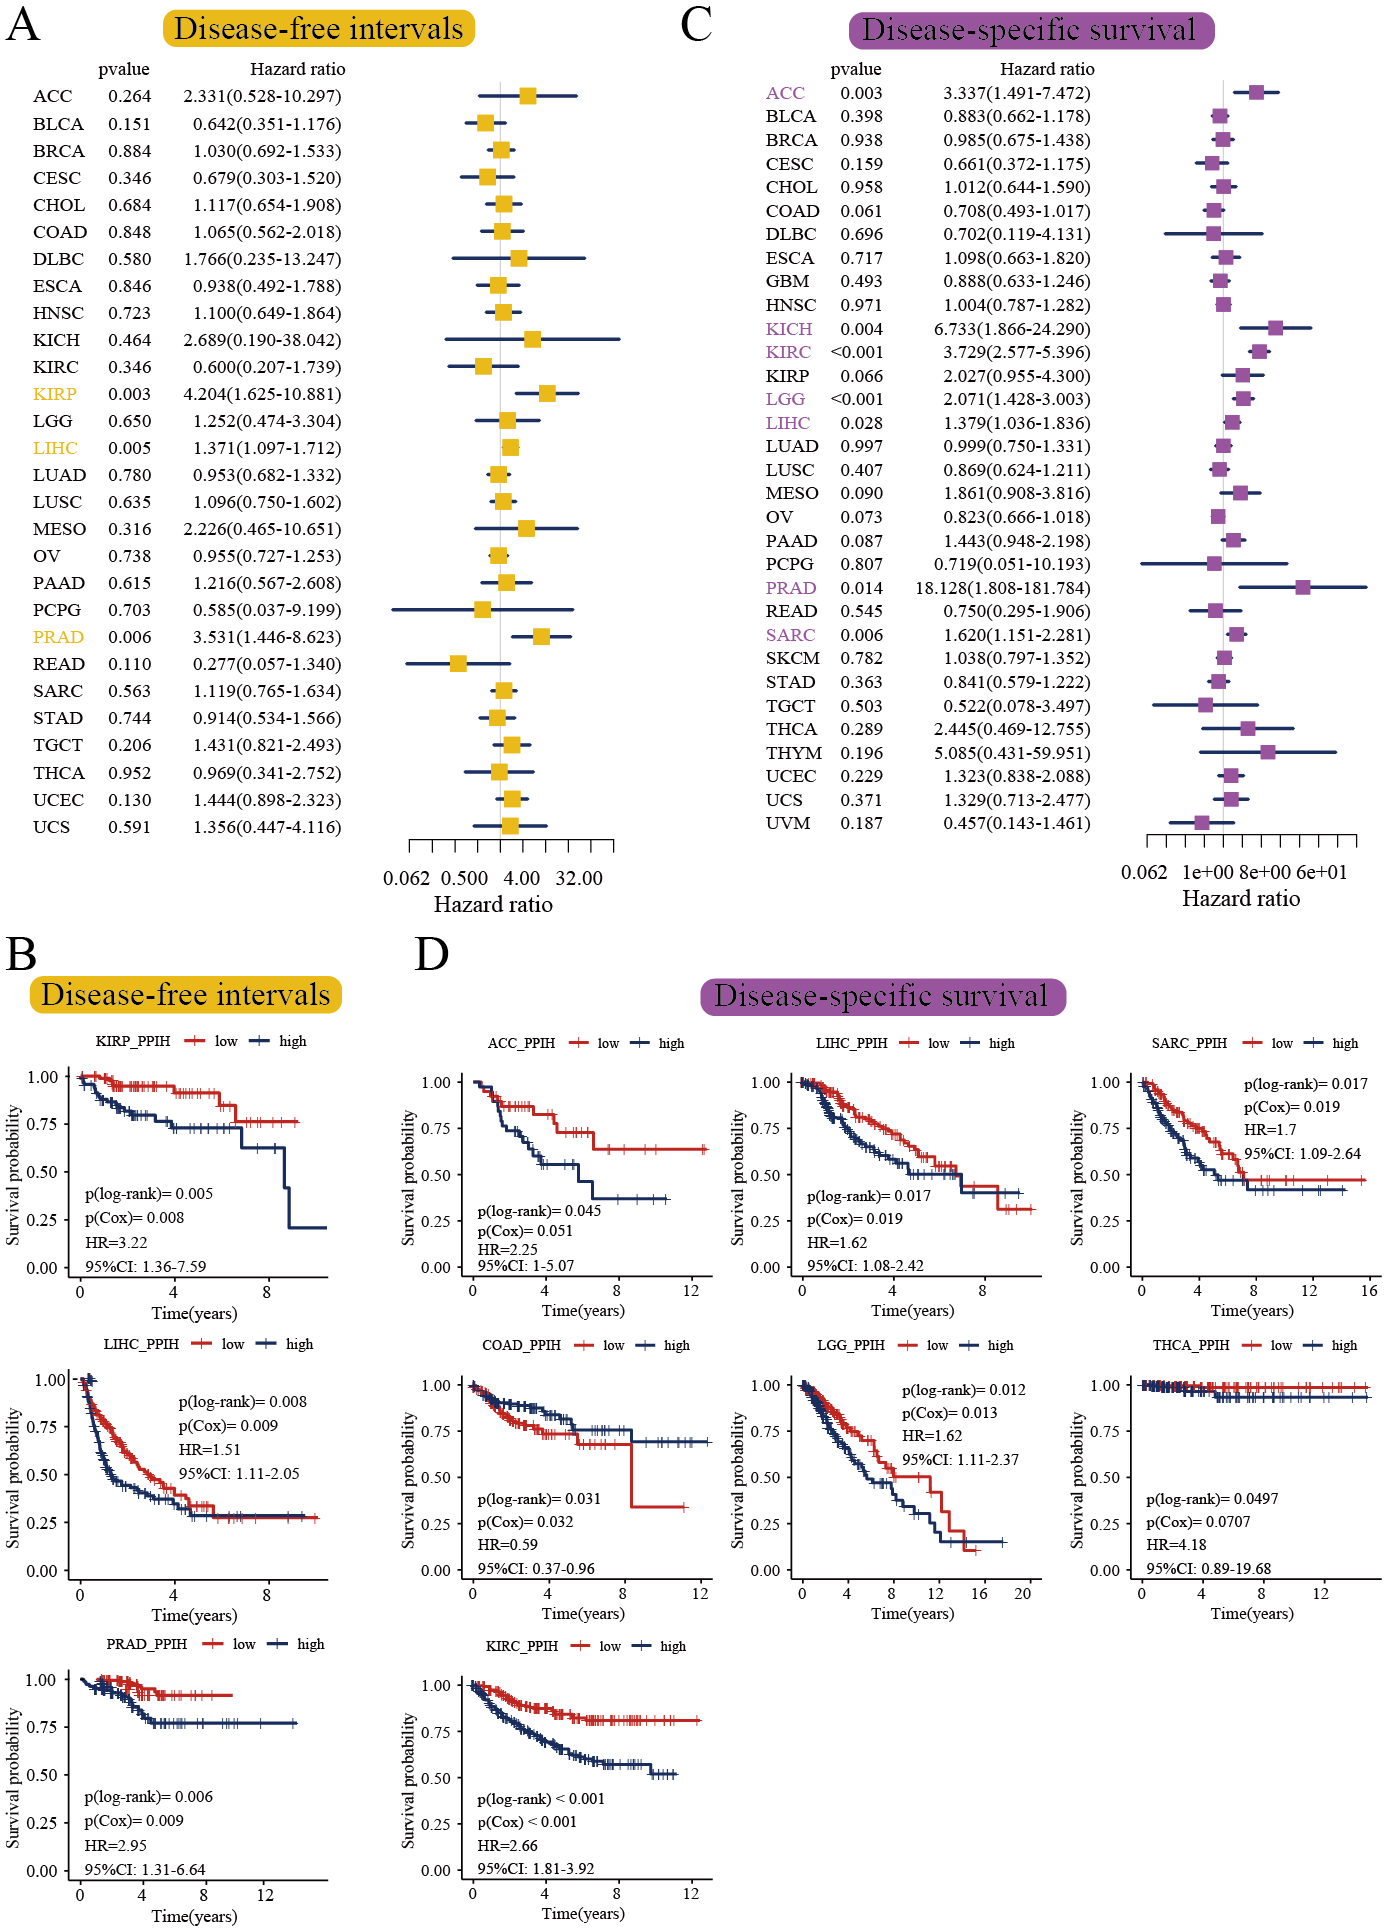
Supplementary Figure 2.** Associations between PPIH and DFI or DSS in the TCGA-HCC cohort. (A) Cox regression was used to analyse the expression levels of PPIH and DFI in a univariate manner in the TCGA cohort. (B) Correlation between PPIH expression levels and the DFI. (C) Analysis of the correlation between PPIH expression levels and DSS using univariate Cox regression. (D) Correlation between PPIH expression levels and DSS.

**
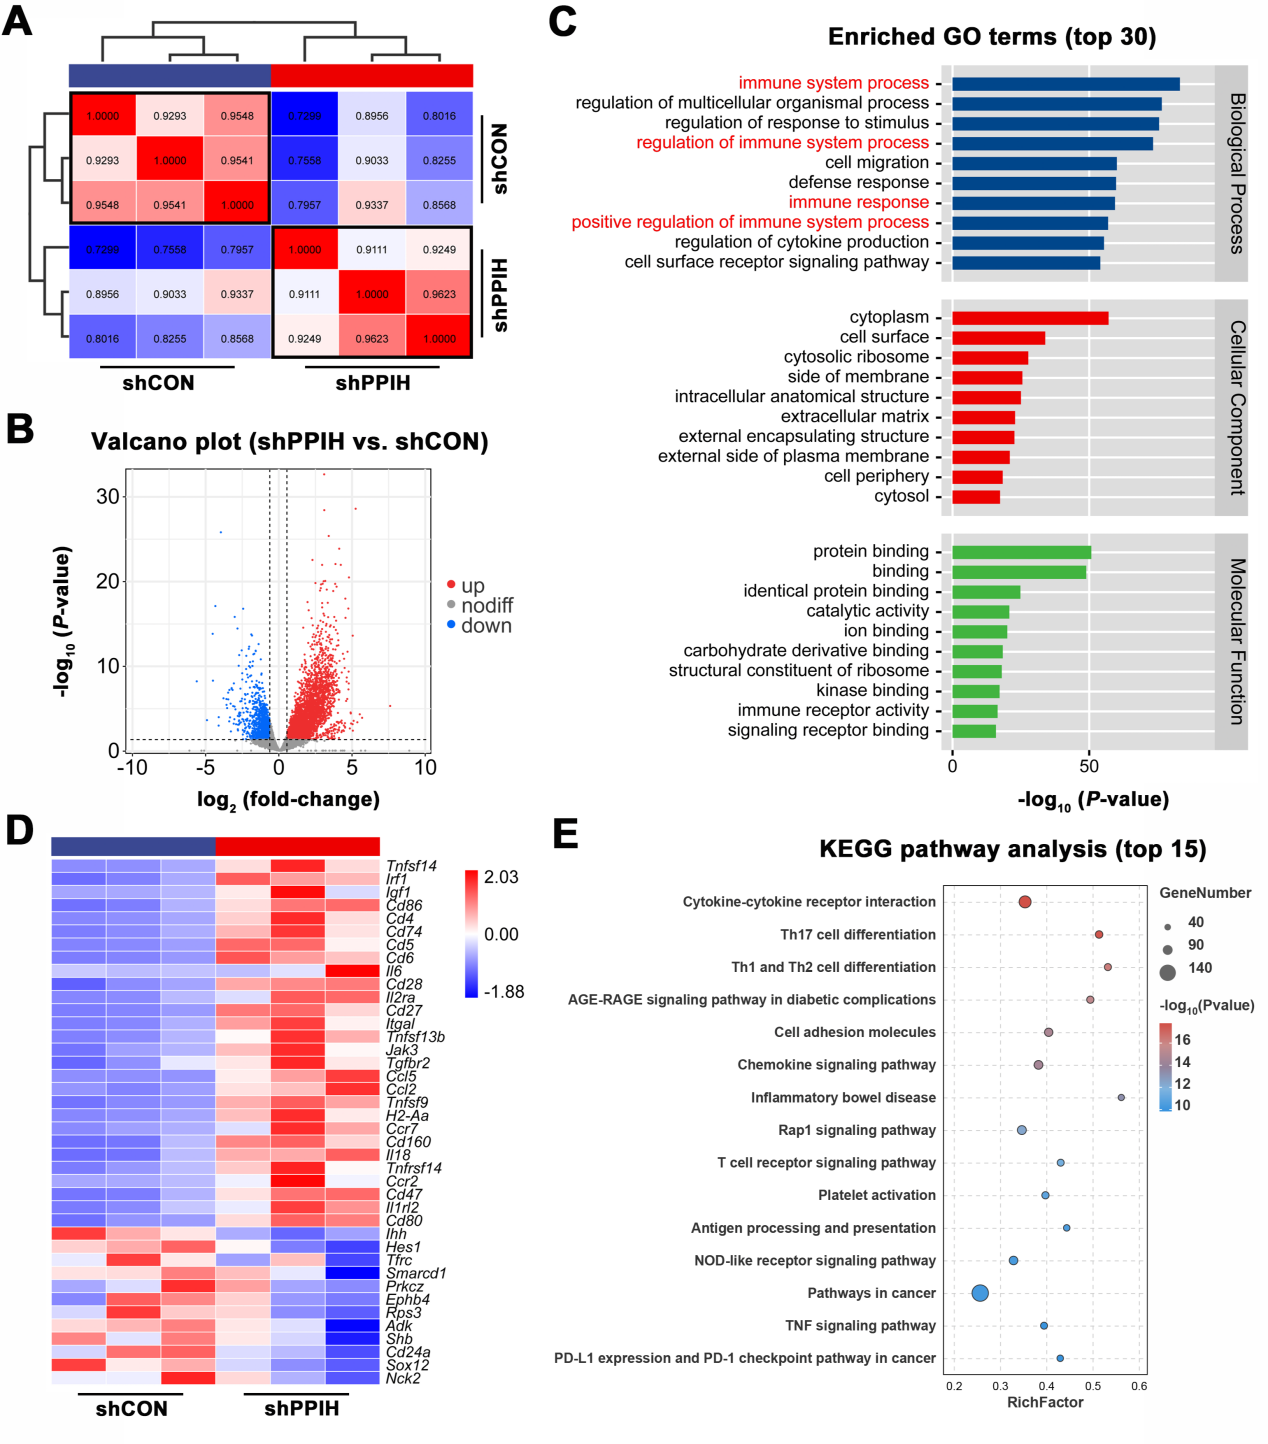
Supplementary Figure 3.** Transcriptomic analysis of wild-type and PPIH-knockdown Hepa1-6 tumors from subcutaneous tumor-bearing mouse model.(A) Heatmap of Pearson’s correlation coefficient matrix for gene expression from all testing samples based on RNA-seq. n = 3. (B) A volcano plot depicting differential gene expression in PPIH-knockdown versus wild-type tumors. n = 3, fold change ≥ 1.5, *P* < 0.05, and false discovery rate < 0.05. (C) Top 30 enriched Gene Ontology (GO) terms for differentially expressed genes in the shPPIH group relative to the shCON group. (D) Heat map showing the expression patterns of differentially expressed genes associated with T cell differentiation, activation and proliferation. n = 3. (E) KEGG pathway enrichment analysis of the up-regulated genes after PPIH knockdown.

| **Supplementary Table 1. Pathways regulating Cell Death.** | |
| --- | --- |
| **Symbol** | **Type** |
| ABCC1 | pyroptosis |
| ACE | pyroptosis |
| ADSL | pyroptosis |
| AHCY | pyroptosis |
| ANXA1 | pyroptosis |
| ARNT | pyroptosis |
| ARPC1B | pyroptosis |
| BCL6 | pyroptosis |
| BTG3 | pyroptosis |
| CCL28 | pyroptosis |
| CCN2 | pyroptosis |
| CCR2 | pyroptosis |
| CD53 | pyroptosis |
| CD69 | pyroptosis |
| CD86 | pyroptosis |
| CD8A | pyroptosis |
| CXCL2 | pyroptosis |
| CXCR4 | pyroptosis |
| CYBB | pyroptosis |
| CYCS | pyroptosis |
| DUSP5 | pyroptosis |
| EBI3 | pyroptosis |
| EGFR | pyroptosis |
| ENTPD1 | pyroptosis |
| ERBB2 | pyroptosis |
| FGF2 | pyroptosis |
| FN1 | pyroptosis |
| FOLH1 | pyroptosis |
| FOXP3 | pyroptosis |
| FRZB | pyroptosis |
| GBP1 | pyroptosis |
| GCLC | pyroptosis |
| GOLPH3 | pyroptosis |
| HAVCR2 | pyroptosis |
| HGF | pyroptosis |
| HK1 | pyroptosis |
| HLA-DQA1 | pyroptosis |
| HLA-DRB1 | pyroptosis |
| HLA-DRB3 | pyroptosis |
| HMGB1 | pyroptosis |
| HNRNPC | pyroptosis |
| HSPB8 | pyroptosis |
| IFNGR2 | pyroptosis |
| IGF1 | pyroptosis |
| IGFBP3 | pyroptosis |
| IL10RB | pyroptosis |
| IL16 | pyroptosis |
| IL18 | pyroptosis |
| IL18R1 | pyroptosis |
| IL1R1 | pyroptosis |
| IL23A | pyroptosis |
| IL33 | pyroptosis |
| IL4 | pyroptosis |
| IL6 | pyroptosis |
| ITGAL | pyroptosis |
| LCN2 | pyroptosis |
| LDHD | pyroptosis |
| LRBA | pyroptosis |
| LRP1 | pyroptosis |
| LZTFL1 | pyroptosis |
| MARK3 | pyroptosis |
| MET | pyroptosis |
| MOK | pyroptosis |
| MSX2 | pyroptosis |
| MYD88 | pyroptosis |
| NGF | pyroptosis |
| NLRP3 | pyroptosis |
| OSBP | pyroptosis |
| PDE4DIP | pyroptosis |
| PPA1 | pyroptosis |
| PRKAB1 | pyroptosis |
| PTH | pyroptosis |
| RAB9A | pyroptosis |
| RARA | pyroptosis |
| RBM5 | pyroptosis |
| RELB | pyroptosis |
| RHOD | pyroptosis |
| RPS6KB1 | pyroptosis |
| S1PR1 | pyroptosis |
| SAA1 | pyroptosis |
| SCD | pyroptosis |
| SGPL1 | pyroptosis |
| SIRT5 | pyroptosis |
| SLC11A1 | pyroptosis |
| SLC6A1 | pyroptosis |
| SLTM | pyroptosis |
| SOD1 | pyroptosis |
| SOS1 | pyroptosis |
| SOX9 | pyroptosis |
| STAT1 | pyroptosis |
| STAT3 | pyroptosis |
| STAT5B | pyroptosis |
| SYK | pyroptosis |
| TBCA | pyroptosis |
| TFDP2 | pyroptosis |
| TLE1 | pyroptosis |
| TLR4 | pyroptosis |
| UGCG | pyroptosis |
| USP9X | pyroptosis |
| VCAM1 | pyroptosis |
| VIM | pyroptosis |
| WNT5A | pyroptosis |
| XCL1 | pyroptosis |
| MMP7 | pyroptosis |
| CIB2 | pyroptosis |
| DAXX | pyroptosis |
| ATRX | pyroptosis |
| CHGB | pyroptosis |
| FGFR4 | pyroptosis |
| SLC6A2 | pyroptosis |
| CCND1 | pyroptosis |
| TPM1 | pyroptosis |
| HRAS | pyroptosis |
| BAP1 | pyroptosis |
| CREBBP | pyroptosis |
| EIF4E | pyroptosis |
| DAB2 | pyroptosis |
| MYB | pyroptosis |
| ATP7A | pyroptosis |
| PSG2 | pyroptosis |
| RNF2 | pyroptosis |
| RORA | pyroptosis |
| TLR6 | pyroptosis |
| WWOX | pyroptosis |
| FUT4 | pyroptosis |
| PCNA | pyroptosis |
| EGR1 | pyroptosis |
| PRLR | pyroptosis |
| ACTN4 | pyroptosis |
| CCNH | pyroptosis |
| RBP4 | pyroptosis |
| TIE1 | pyroptosis |
| FGF13 | pyroptosis |
| ITGB1 | pyroptosis |
| TAL1 | pyroptosis |
| KIF14 | pyroptosis |
| KIFC1 | pyroptosis |
| CDCA7 | pyroptosis |
| ETS1 | pyroptosis |
| HBEGF | pyroptosis |
| RAB7A | pyroptosis |
| RIPK2 | pyroptosis |
| SMAD4 | pyroptosis |
| TXNRD2 | pyroptosis |
| RPS6KA3 | pyroptosis |
| CEBPB | pyroptosis |
| DHRS3 | pyroptosis |
| ARF1 | pyroptosis |
| BCL3 | pyroptosis |
| GADD45A | pyroptosis |
| MDM4 | pyroptosis |
| PRMT1 | pyroptosis |
| ADAM12 | pyroptosis |
| BNIP3L | pyroptosis |
| C1D | pyroptosis |
| CRYAB | pyroptosis |
| CTNND1 | pyroptosis |
| CXADR | pyroptosis |
| CXCL13 | pyroptosis |
| CYP19A1 | pyroptosis |
| EPHA1 | pyroptosis |
| GDF11 | pyroptosis |
| HCLS1 | pyroptosis |
| ITGB5 | pyroptosis |
| MECOM | pyroptosis |
| MTA1 | pyroptosis |
| NRP2 | pyroptosis |
| PCSK5 | pyroptosis |
| PFN1 | pyroptosis |
| POLR2A | pyroptosis |
| PRKD2 | pyroptosis |
| RAB1B | pyroptosis |
| RAB6A | pyroptosis |
| RBM3 | pyroptosis |
| SERPINB2 | pyroptosis |
| SIAH1 | pyroptosis |
| TFPI2 | pyroptosis |
| TNFRSF10B | pyroptosis |
| IL23R | pyroptosis |
| CLASP2 | pyroptosis |
| FLOT1 | pyroptosis |
| NNMT | pyroptosis |
| PLCL1 | pyroptosis |
| SUOX | pyroptosis |
| HSF2 | pyroptosis |
| ID1 | pyroptosis |
| LOX | pyroptosis |
| NDRG1 | pyroptosis |
| TPR | pyroptosis |
| CPSF2 | pyroptosis |
| CTDSPL | pyroptosis |
| ENDOU | pyroptosis |
| ERCC5 | pyroptosis |
| GPD2 | pyroptosis |
| HNRNPD | pyroptosis |
| HOOK1 | pyroptosis |
| IGFBP1 | pyroptosis |
| IQGAP1 | pyroptosis |
| LIG4 | pyroptosis |
| NRCAM | pyroptosis |
| SLC1A3 | pyroptosis |
| UBE2N | pyroptosis |
| WDR11 | pyroptosis |
| ZNF331 | pyroptosis |
| ST6GALNAC2 | pyroptosis |
| HOXD9 | pyroptosis |
| SERPINB6 | pyroptosis |
| RESF1 | pyroptosis |
| ZNF638 | pyroptosis |
| CTCF | pyroptosis |
| ELF4 | pyroptosis |
| LMO2 | pyroptosis |
| OSTM1 | pyroptosis |
| CCNA2 | pyroptosis |
| CKS2 | pyroptosis |
| DLGAP5 | pyroptosis |
| FADS1 | pyroptosis |
| HNRNPA2B1 | pyroptosis |
| PDCD5 | pyroptosis |
| PHLDA1 | pyroptosis |
| SOX7 | pyroptosis |
| HCRT | pyroptosis |
| EGR2 | pyroptosis |
| MYO5B | pyroptosis |
| SOCS4 | pyroptosis |
| TRAF6 | pyroptosis |
| CD80 | pyroptosis |
| IL12RB1 | pyroptosis |
| IL27 | pyroptosis |
| IL4R | pyroptosis |
| PRKCZ | pyroptosis |
| ACTR3 | pyroptosis |
| ADAMTS1 | pyroptosis |
| ADH6 | pyroptosis |
| AKAP12 | pyroptosis |
| ARNT2 | pyroptosis |
| ATF7 | pyroptosis |
| C1QTNF6 | pyroptosis |
| CAB39 | pyroptosis |
| CD36 | pyroptosis |
| COPB2 | pyroptosis |
| COPS7A | pyroptosis |
| DSC2 | pyroptosis |
| EFNB1 | pyroptosis |
| EIF4A1 | pyroptosis |
| FBLN1 | pyroptosis |
| FBLN2 | pyroptosis |
| GALNT2 | pyroptosis |
| HLA-DQB1 | pyroptosis |
| IFNGR1 | pyroptosis |
| IL17D | pyroptosis |
| IL1RL1 | pyroptosis |
| IRF2 | pyroptosis |
| KAT6B | pyroptosis |
| KLHL6 | pyroptosis |
| KLHL7 | pyroptosis |
| LEF1 | pyroptosis |
| MITF | pyroptosis |
| MYDGF | pyroptosis |
| NDUFB6 | pyroptosis |
| NET1 | pyroptosis |
| PAWR | pyroptosis |
| PBX1 | pyroptosis |
| PDCD2 | pyroptosis |
| PDHA1 | pyroptosis |
| PGAP3 | pyroptosis |
| PITPNC1 | pyroptosis |
| PON2 | pyroptosis |
| PPME1 | pyroptosis |
| PPP2CA | pyroptosis |
| PRSS23 | pyroptosis |
| PTGER4 | pyroptosis |
| PTPN14 | pyroptosis |
| PTPRCAP | pyroptosis |
| RBBP6 | pyroptosis |
| RHOB | pyroptosis |
| RUFY1 | pyroptosis |
| RUFY3 | pyroptosis |
| SEM1 | pyroptosis |
| SEMA3B | pyroptosis |
| SEMA4D | pyroptosis |
| SERPINE2 | pyroptosis |
| SGCB | pyroptosis |
| SLCO2A1 | pyroptosis |
| SOCS6 | pyroptosis |
| STAT6 | pyroptosis |
| TCF4 | pyroptosis |
| TCF7L2 | pyroptosis |
| TGFB3 | pyroptosis |
| TIA1 | pyroptosis |
| TOX | pyroptosis |
| UBR2 | pyroptosis |
| VASP | pyroptosis |
| EIF3L | pyroptosis |
| CDC25A | pyroptosis |
| CYP39A1 | pyroptosis |
| LPP | pyroptosis |
| ST8SIA4 | pyroptosis |
| MAST2 | pyroptosis |
| JAK3 | pyroptosis |
| CCL19 | pyroptosis |
| CSDE1 | pyroptosis |
| PAFAH1B3 | pyroptosis |
| PER1 | pyroptosis |
| AP1G1 | pyroptosis |
| CRABP2 | pyroptosis |
| KRT13 | pyroptosis |
| PRDX4 | pyroptosis |
| PTPRK | pyroptosis |
| STAMBP | pyroptosis |
| COL17A1 | pyroptosis |
| IRF4 | pyroptosis |
| INPP5A | pyroptosis |
| PRPF38B | pyroptosis |
| SLC6A5 | pyroptosis |
| EML4 | pyroptosis |
| TWF1 | pyroptosis |
| CHL1 | pyroptosis |
| CHRNA7 | pyroptosis |
| DSC3 | pyroptosis |
| LCK | pyroptosis |
| LINC-PINT | pyroptosis |
| MORF4L1 | pyroptosis |
| MYH10 | pyroptosis |
| VDAC3 | pyroptosis |
| ZMAT3 | pyroptosis |
| ADAM11 | pyroptosis |
| CDK14 | pyroptosis |
| DCTD | pyroptosis |
| DLG1 | pyroptosis |
| DNAJB6 | pyroptosis |
| ESD | pyroptosis |
| SLAMF1 | pyroptosis |
| SPTBN1 | pyroptosis |
| GLRX | pyroptosis |
| NMT1 | pyroptosis |
| GALC | pyroptosis |
| ANKRD11 | pyroptosis |
| DLX4 | pyroptosis |
| IRS2 | pyroptosis |
| LIMS1 | pyroptosis |
| MT1X | pyroptosis |
| PDGFRL | pyroptosis |
| PUDP | pyroptosis |
| QPCT | pyroptosis |
| RAB2A | pyroptosis |
| RBL1 | pyroptosis |
| SEMA4A | pyroptosis |
| TNFSF4 | pyroptosis |
| MEMO1 | pyroptosis |
| AVPR1A | pyroptosis |
| BCL2L2 | pyroptosis |
| CACNA1A | pyroptosis |
| GABBR1 | pyroptosis |
| PPP3CA | pyroptosis |
| RIT2 | pyroptosis |
| HPCA | pyroptosis |
| CNN1 | pyroptosis |
| MT1H | pyroptosis |
| MAGI1 | pyroptosis |
| ALDH9A1 | pyroptosis |
| CCNC | pyroptosis |
| CHI3L2 | pyroptosis |
| COL3A1 | pyroptosis |
| CRHBP | pyroptosis |
| ITGB8 | pyroptosis |
| LDHC | pyroptosis |
| NELL2 | pyroptosis |
| NRK | pyroptosis |
| PPP1R12C | pyroptosis |
| STK39 | pyroptosis |
| USP1 | pyroptosis |
| CALU | pyroptosis |
| PCK2 | pyroptosis |
| RAB11B | pyroptosis |
| APPBP2 | pyroptosis |
| OAZ1 | pyroptosis |
| PSG1 | pyroptosis |
| PTPRN2 | pyroptosis |
| SLC18A2 | pyroptosis |
| AP1S2 | pyroptosis |
| ATOX1 | pyroptosis |
| CD84 | pyroptosis |
| DHRS7 | pyroptosis |
| DOCK2 | pyroptosis |
| ELL2 | pyroptosis |
| GSTA2 | pyroptosis |
| HNMT | pyroptosis |
| HPRT1 | pyroptosis |
| IL11RA | pyroptosis |
| NCOR1 | pyroptosis |
| NT5C3A | pyroptosis |
| PDCD10 | pyroptosis |
| PPP1R14A | pyroptosis |
| PRG2 | pyroptosis |
| PRKACA | pyroptosis |
| PTGFRN | pyroptosis |
| PXDN | pyroptosis |
| RBM6 | pyroptosis |
| SEC23A | pyroptosis |
| THOC1 | pyroptosis |
| TMBIM4 | pyroptosis |
| USP12 | pyroptosis |
| TMEM64 | pyroptosis |
| BEX3 | pyroptosis |
| DCT | pyroptosis |
| CYP51A1 | pyroptosis |
| SOCS5 | pyroptosis |
| AGPAT1 | pyroptosis |
| CNKSR1 | pyroptosis |
| IL18BP | pyroptosis |
| PRELP | pyroptosis |
| SEMA7A | pyroptosis |
| TCEA2 | pyroptosis |
| TMEM158 | pyroptosis |
| TOPBP1 | pyroptosis |
| SKAP1 | pyroptosis |
| BDH2 | pyroptosis |
| PAPPA | pyroptosis |
| SLC31A2 | pyroptosis |
| RNF168 | pyroptosis |
| RYBP | pyroptosis |
| IL12B | pyroptosis |
| EFNB3 | pyroptosis |
| INSL4 | pyroptosis |
| LIPC | pyroptosis |
| NCKAP1 | pyroptosis |
| PHACTR2 | pyroptosis |
| ROPN1L | pyroptosis |
| PPP2R2B | pyroptosis |
| DBT | pyroptosis |
| POFUT1 | pyroptosis |
| DIS3 | pyroptosis |
| CDC37L1 | pyroptosis |
| HLA-DRB4 | pyroptosis |
| IL27RA | pyroptosis |
| SP140 | pyroptosis |
| CCNL2 | pyroptosis |
| FEM1B | pyroptosis |
| HEXB | pyroptosis |
| AMPD3 | pyroptosis |
| CSNK1A1 | pyroptosis |
| CYB5A | pyroptosis |
| PPOX | pyroptosis |
| RAB43 | pyroptosis |
| SLC22A5 | pyroptosis |
| EVI2A | pyroptosis |
| RPL7A | pyroptosis |
| HELZ | pyroptosis |
| MEF2C | pyroptosis |
| GGA3 | pyroptosis |
| HLX | pyroptosis |
| DNALI1 | pyroptosis |
| MOGAT2 | pyroptosis |
| POU2AF1 | pyroptosis |
| PTPN18 | pyroptosis |
| PWAR5 | pyroptosis |
| RIN2 | pyroptosis |
| SP3 | pyroptosis |
| SSR3 | pyroptosis |
| SVIL | pyroptosis |
| TP53I11 | pyroptosis |
| ADAMTS3 | pyroptosis |
| CNKSR2 | pyroptosis |
| PRKACB | pyroptosis |
| ATP5ME | pyroptosis |
| LRRFIP2 | pyroptosis |
| SNX8 | pyroptosis |
| MINK1 | pyroptosis |
| AKAP6 | pyroptosis |
| ZFP36L1 | pyroptosis |
| ERMP1 | pyroptosis |
| DNAJA1 | pyroptosis |
| ATP6V0A1 | pyroptosis |
| CYBRD1 | pyroptosis |
| DDX11 | pyroptosis |
| DUSP8 | pyroptosis |
| ERICH1 | pyroptosis |
| HIBCH | pyroptosis |
| INPP1 | pyroptosis |
| MPP3 | pyroptosis |
| NFYB | pyroptosis |
| PHIP | pyroptosis |
| POLR2F | pyroptosis |
| SLC26A10 | pyroptosis |
| SLC6A12 | pyroptosis |
| SPIDR | pyroptosis |
| TAF1C | pyroptosis |
| CSF2RB | pyroptosis |
| MAN1A1 | pyroptosis |
| N4BP1 | pyroptosis |
| GM2A | pyroptosis |
| CIR1 | pyroptosis |
| GYPB | pyroptosis |
| CCL13 | pyroptosis |
| ITPKB | pyroptosis |
| PPP2CB | pyroptosis |
| LCP2 | pyroptosis |
| POMP | pyroptosis |
| TNFSF18 | pyroptosis |
| APBA3 | pyroptosis |
| CACNA1I | pyroptosis |
| CASD1 | pyroptosis |
| DOCK4 | pyroptosis |
| HLA-DRB5 | pyroptosis |
| ITIH2 | pyroptosis |
| KCNK1 | pyroptosis |
| LRMDA | pyroptosis |
| SH2D1A | pyroptosis |
| TEFM | pyroptosis |
| POLR2D | pyroptosis |
| HSD17B10 | pyroptosis |
| GNPNAT1 | pyroptosis |
| KSR2 | pyroptosis |
| SLC9A6 | pyroptosis |
| ALDH3B2 | pyroptosis |
| AP3B2 | pyroptosis |
| RHOBTB3 | pyroptosis |
| TAF10 | pyroptosis |
| ZNF507 | pyroptosis |
| DSCAM | pyroptosis |
| ATP6V0B | pyroptosis |
| C3AR1 | pyroptosis |
| RC3H1 | pyroptosis |
| ACSM2A | pyroptosis |
| ALDH8A1 | pyroptosis |
| ARPC3 | pyroptosis |
| ASMTL | pyroptosis |
| CEPT1 | pyroptosis |
| CHRNE | pyroptosis |
| COG6 | pyroptosis |
| CREBL2 | pyroptosis |
| DDX18 | pyroptosis |
| DIPK1A | pyroptosis |
| ENPP5 | pyroptosis |
| EPS8L1 | pyroptosis |
| FMO4 | pyroptosis |
| GIMAP4 | pyroptosis |
| GOLGA4 | pyroptosis |
| GTF2H2C | pyroptosis |
| GTF3C4 | pyroptosis |
| HIBADH | pyroptosis |
| KCNA4 | pyroptosis |
| LINS1 | pyroptosis |
| LRRTM3 | pyroptosis |
| MED17 | pyroptosis |
| MFSD6 | pyroptosis |
| MGAT2 | pyroptosis |
| MTMR10 | pyroptosis |
| NDEL1 | pyroptosis |
| NLRP10 | pyroptosis |
| PCDH1 | pyroptosis |
| PCYT2 | pyroptosis |
| PHF3 | pyroptosis |
| PLD6 | pyroptosis |
| PLPPR3 | pyroptosis |
| PPIEL | pyroptosis |
| PPP1CC | pyroptosis |
| PPP3CB | pyroptosis |
| PRKAB2 | pyroptosis |
| RABGGTB | pyroptosis |
| RAP1GAP2 | pyroptosis |
| RPL23AP7 | pyroptosis |
| SEC22A | pyroptosis |
| SH3D19 | pyroptosis |
| SLC25A46 | pyroptosis |
| SLC30A5 | pyroptosis |
| SLC35B1 | pyroptosis |
| SLC35F5 | pyroptosis |
| SLC7A6OS | pyroptosis |
| SNAPC3 | pyroptosis |
| SNX17 | pyroptosis |
| STAU2 | pyroptosis |
| SYNC | pyroptosis |
| TBC1D4 | pyroptosis |
| UBTD2 | pyroptosis |
| UTP3 | pyroptosis |
| VDAC1P5 | pyroptosis |
| ZNF518A | pyroptosis |
| BAK1 | pyroptosis |
| BAX | pyroptosis |
| CASP1 | pyroptosis |
| CASP3 | pyroptosis |
| CASP4 | pyroptosis |
| CASP5 | pyroptosis |
| CHMP2A | pyroptosis |
| CHMP2B | pyroptosis |
| CHMP3 | pyroptosis |
| CHMP4A | pyroptosis |
| CHMP4B | pyroptosis |
| CHMP4C | pyroptosis |
| CHMP6 | pyroptosis |
| CHMP7 | pyroptosis |
| ELANE | pyroptosis |
| GSDMD | pyroptosis |
| GSDME | pyroptosis |
| GZMB | pyroptosis |
| IL1A | pyroptosis |
| IL1B | pyroptosis |
| IRF1 | pyroptosis |
| TP53 | pyroptosis |
| TP63 | pyroptosis |
| CASP6 | pyroptosis |
| CASP8 | pyroptosis |
| CASP9 | pyroptosis |
| GPX4 | pyroptosis |
| GSDMB | pyroptosis |
| GSDMC | pyroptosis |
| NLRC4 | pyroptosis |
| NLRP1 | pyroptosis |
| NLRP2 | pyroptosis |
| NLRP6 | pyroptosis |
| NLRP7 | pyroptosis |
| NOD1 | pyroptosis |
| PLCG1 | pyroptosis |
| PJVK | pyroptosis |
| PYCARD | pyroptosis |
| SCAF11 | pyroptosis |
| TINAP | pyroptosis |
| TNF | pyroptosis |
| AIM2 | pyroptosis |
| GSDMA | pyroptosis |
| NOD2 | pyroptosis |
| TIRAP | pyroptosis |
| ABL1 | parthanatos |
| ACKR3 | parthanatos |
| APEX1 | parthanatos |
| ATM | parthanatos |
| ATR | parthanatos |
| BCL2 | parthanatos |
| BCL2L1 | parthanatos |
| BID | parthanatos |
| BRCA1 | parthanatos |
| BRCA2 | parthanatos |
| BRD4 | parthanatos |
| CD74 | parthanatos |
| CDKN2A | parthanatos |
| CENPJ | parthanatos |
| CXCL12 | parthanatos |
| EGFR | parthanatos |
| EPHA2 | parthanatos |
| GIGYF2 | parthanatos |
| GML | parthanatos |
| HMGA2 | parthanatos |
| HMGB1 | parthanatos |
| HMOX1 | parthanatos |
| HNRNPK | parthanatos |
| HTRA2 | parthanatos |
| KAT5 | parthanatos |
| KDM1A | parthanatos |
| MAPK14 | parthanatos |
| MAPKAPK2 | parthanatos |
| MCL1 | parthanatos |
| MDM2 | parthanatos |
| MGMT | parthanatos |
| MUC1 | parthanatos |
| NBN | parthanatos |
| NPM1 | parthanatos |
| PARP1 | parthanatos |
| PLK3 | parthanatos |
| PMAIP1 | parthanatos |
| POLD1 | parthanatos |
| PYCARD | parthanatos |
| S100A9 | parthanatos |
| SIRT1 | parthanatos |
| TFAP4 | parthanatos |
| TFDP1 | parthanatos |
| TFDP2 | parthanatos |
| TNF | parthanatos |
| TNFRSF1A | parthanatos |
| TP53 | parthanatos |
| TP63 | parthanatos |
| ZBTB32 | parthanatos |
| MYC | parthanatos |
| ATRX | parthanatos |
| CCND1 | parthanatos |
| AURKA | parthanatos |
| UBB | parthanatos |
| SOX4 | parthanatos |
| SNAI2 | parthanatos |
| PIK3R1 | parthanatos |
| CDKN1B | parthanatos |
| CHEK1 | parthanatos |
| FOXM1 | parthanatos |
| PLK1 | parthanatos |
| BAX | parthanatos |
| CDKN1A | parthanatos |
| CHEK2 | parthanatos |
| PCBP4 | parthanatos |
| BOK | parthanatos |
| CBX8 | parthanatos |
| CCAR2 | parthanatos |
| CD44 | parthanatos |
| MLH1 | parthanatos |
| MSH2 | parthanatos |
| USP28 | parthanatos |
| MSH6 | parthanatos |
| PCNA | parthanatos |
| CDK2 | parthanatos |
| MIF | parthanatos |
| PLK2 | parthanatos |
| NUPR1 | parthanatos |
| TPT1 | parthanatos |
| ANTXR1 | parthanatos |
| MRE11 | parthanatos |
| CCNB1 | parthanatos |
| CDK1 | parthanatos |
| E2F1 | parthanatos |
| FANCI | parthanatos |
| FBXO5 | parthanatos |
| GTSE1 | parthanatos |
| BCL2A1 | parthanatos |
| BRCC3 | parthanatos |
| EP300 | parthanatos |
| RFC3 | parthanatos |
| RPA1 | parthanatos |
| TNFRSF1B | parthanatos |
| BAD | parthanatos |
| BAK1 | parthanatos |
| CASP9 | parthanatos |
| BCL3 | parthanatos |
| BTG2 | parthanatos |
| CDC25C | parthanatos |
| CNOT9 | parthanatos |
| FOXO3 | parthanatos |
| GADD45A | parthanatos |
| MDM4 | parthanatos |
| PML | parthanatos |
| PRMT1 | parthanatos |
| SMC1A | parthanatos |
| TP73 | parthanatos |
| WNT1 | parthanatos |
| ANKRD1 | parthanatos |
| BABAM1 | parthanatos |
| BABAM2 | parthanatos |
| BCL2L12 | parthanatos |
| CLU | parthanatos |
| DDX5 | parthanatos |
| DYRK2 | parthanatos |
| EYA3 | parthanatos |
| FOXO4 | parthanatos |
| H2AX | parthanatos |
| HIC1 | parthanatos |
| IKBKE | parthanatos |
| ING2 | parthanatos |
| RNF8 | parthanatos |
| SFRP2 | parthanatos |
| SNAI1 | parthanatos |
| UBE2B | parthanatos |
| UIMC1 | parthanatos |
| DDIT4 | parthanatos |
| POLD2 | parthanatos |
| RBX1 | parthanatos |
| PRKDC | parthanatos |
| NDRG1 | parthanatos |
| PRKCD | parthanatos |
| HIPK2 | parthanatos |
| RGCC | parthanatos |
| BLM | parthanatos |
| CRIP1 | parthanatos |
| PLA2R1 | parthanatos |
| UBE2N | parthanatos |
| RFWD3 | parthanatos |
| CDKN2D | parthanatos |
| CCNA2 | parthanatos |
| DTL | parthanatos |
| RPA3 | parthanatos |
| FBXO31 | parthanatos |
| MSX1 | parthanatos |
| SYF2 | parthanatos |
| ING4 | parthanatos |
| MYO6 | parthanatos |
| PLAGL1 | parthanatos |
| SFN | parthanatos |
| UBA52 | parthanatos |
| USP10 | parthanatos |
| BCL2L10 | parthanatos |
| BCL2L11 | parthanatos |
| CDK5RAP3 | parthanatos |
| CLSPN | parthanatos |
| CUL4A | parthanatos |
| CUL4B | parthanatos |
| ERCC6 | parthanatos |
| ERCC8 | parthanatos |
| EYA1 | parthanatos |
| FZR1 | parthanatos |
| HIPK1 | parthanatos |
| MAEL | parthanatos |
| POLB | parthanatos |
| RBBP8 | parthanatos |
| RFC1 | parthanatos |
| RIF1 | parthanatos |
| SLC19A1 | parthanatos |
| TAOK2 | parthanatos |
| TIGAR | parthanatos |
| TRIM28 | parthanatos |
| TRIM32 | parthanatos |
| USP47 | parthanatos |
| XPA | parthanatos |
| CNOT7 | parthanatos |
| CNOT8 | parthanatos |
| IFI16 | parthanatos |
| E2F7 | parthanatos |
| RBL2 | parthanatos |
| DDB1 | parthanatos |
| POLD3 | parthanatos |
| ARTN | parthanatos |
| FGF10 | parthanatos |
| RAD18 | parthanatos |
| CNOT6 | parthanatos |
| RFC4 | parthanatos |
| RFC2 | parthanatos |
| MAD2L2 | parthanatos |
| MOAP1 | parthanatos |
| PHLDA3 | parthanatos |
| E2F4 | parthanatos |
| PIDD1 | parthanatos |
| NKX3-1 | parthanatos |
| SKIL | parthanatos |
| BCL2L2 | parthanatos |
| BCLAF1 | parthanatos |
| POLD4 | parthanatos |
| TAOK3 | parthanatos |
| USP32 | parthanatos |
| SNW1 | parthanatos |
| CASP2 | parthanatos |
| CRADD | parthanatos |
| CNOT2 | parthanatos |
| GRB2 | parthanatos |
| RBM38 | parthanatos |
| RPS6KA6 | parthanatos |
| FNIP2 | parthanatos |
| USP1 | parthanatos |
| NPAS2 | parthanatos |
| ARID3A | parthanatos |
| UBC | parthanatos |
| FOXN3 | parthanatos |
| RAD9A | parthanatos |
| CARM1 | parthanatos |
| CDC5L | parthanatos |
| DGKZ | parthanatos |
| RPS27A | parthanatos |
| TRIAP1 | parthanatos |
| CRY1 | parthanatos |
| DDX39B | parthanatos |
| DEPDC1B | parthanatos |
| KDM4D | parthanatos |
| NEK6 | parthanatos |
| NSMCE1 | parthanatos |
| RNASEH2B | parthanatos |
| SERPINA2 | parthanatos |
| SPRED1 | parthanatos |
| SPRED2 | parthanatos |
| THOC1 | parthanatos |
| TOPORS | parthanatos |
| PPP2R5C | parthanatos |
| CDC14B | parthanatos |
| PIAS4 | parthanatos |
| RNF168 | parthanatos |
| BATF | parthanatos |
| CNOT3 | parthanatos |
| BAG6 | parthanatos |
| EEF1E1 | parthanatos |
| RPS3 | parthanatos |
| ST20 | parthanatos |
| MRPS28 | parthanatos |
| FEM1B | parthanatos |
| PNKP | parthanatos |
| CNOT4 | parthanatos |
| MRPS11 | parthanatos |
| PRPF19 | parthanatos |
| TAF9 | parthanatos |
| CNOT1 | parthanatos |
| PAXIP1 | parthanatos |
| THOC5 | parthanatos |
| BRSK1 | parthanatos |
| SETMAR | parthanatos |
| RPA2 | parthanatos |
| RINT1 | parthanatos |
| ABRAXAS1 | parthanatos |
| PLK5 | parthanatos |
| DNAJA1 | parthanatos |
| CNRIP1 | parthanatos |
| RPS27L | parthanatos |
| WAC | parthanatos |
| NEK11 | parthanatos |
| SPIDR | parthanatos |
| TAOK1 | parthanatos |
| CEP63 | parthanatos |
| RFC5 | parthanatos |
| CEBPG | parthanatos |
| APBB1 | parthanatos |
| FBH1 | parthanatos |
| NFATC4 | parthanatos |
| UBE2V2 | parthanatos |
| TNKS1BP1 | parthanatos |
| REXO2 | parthanatos |
| LRIF1 | parthanatos |
| PGAP2 | parthanatos |
| TMEM109 | parthanatos |
| CNOT10 | parthanatos |
| CNOT11 | parthanatos |
| CNOT6L | parthanatos |
| SP100 | parthanatos |
| ZNF385A | parthanatos |
| AEN | parthanatos |
| CDIP1 | parthanatos |
| CIDEB | parthanatos |
| ELL3 | parthanatos |
| INGX | parthanatos |
| INSL6 | parthanatos |
| MRPS26 | parthanatos |
| MRPS35 | parthanatos |
| MRPS9 | parthanatos |
| NACC2 | parthanatos |
| NSMCE4A | parthanatos |
| NUDT16 | parthanatos |
| POLR1A | parthanatos |
| POLR1B | parthanatos |
| PRKCG | parthanatos |
| SHISA5 | parthanatos |
| SLF1 | parthanatos |
| SLF2 | parthanatos |
| TAF9B | parthanatos |
| TMEM161A | parthanatos |
| PARP | parthanatos |
| AIFM1 | parthanatos |
| HSP70 | parthanatos |
| PAAN | parthanatos |
| ARH3 | parthanatos |
| RNF146 | parthanatos |
| ADPRHL2 | parthanatos |
| OGG1 | parthanatos |
| PGAM5 | oxeiptosis |
| KEAP1 | oxeiptosis |
| AIFM1 | oxeiptosis |
| AIRE | oxeiptosis |
| NRF2 | oxeiptosis |
| ELANE | netotic_cd |
| MMP1 | netotic_cd |
| MPO | netotic_cd |
| CAMP | netotic_cd |
| PADI4 | netotic_cd |
| EIPA | netotic_cd |
| NCX1 | netotic_cd |
| MIA | netotic_cd |
| ACOD1 | necroptosis |
| ADAM17 | necroptosis |
| AGFG1 | necroptosis |
| AKT1 | necroptosis |
| ATF2 | necroptosis |
| BCL2 | necroptosis |
| BID | necroptosis |
| BRAF | necroptosis |
| BTK | necroptosis |
| CAD | necroptosis |
| CASP3 | necroptosis |
| CASP6 | necroptosis |
| CASP8 | necroptosis |
| CAV1 | necroptosis |
| CHUK | necroptosis |
| CREB1 | necroptosis |
| CXCL8 | necroptosis |
| CYCS | necroptosis |
| EGF | necroptosis |
| EGFR | necroptosis |
| EPHB2 | necroptosis |
| EZR | necroptosis |
| FAIM2 | necroptosis |
| FAS | necroptosis |
| FASLG | necroptosis |
| FASN | necroptosis |
| FOS | necroptosis |
| HSPB1 | necroptosis |
| IKBKG | necroptosis |
| IL1A | necroptosis |
| JUN | necroptosis |
| MAP2K7 | necroptosis |
| MAPK1 | necroptosis |
| MAPK14 | necroptosis |
| MAPK3 | necroptosis |
| MAPK8 | necroptosis |
| MAPKAPK2 | necroptosis |
| MAX | necroptosis |
| MDM2 | necroptosis |
| MET | necroptosis |
| NFKB1 | necroptosis |
| NFKB2 | necroptosis |
| NFKBIA | necroptosis |
| PAK1 | necroptosis |
| PARP1 | necroptosis |
| PIK3CA | necroptosis |
| PIK3CB | necroptosis |
| PIK3CD | necroptosis |
| PRKCB | necroptosis |
| PSEN1 | necroptosis |
| RAF1 | necroptosis |
| RASA1 | necroptosis |
| RB1 | necroptosis |
| RELA | necroptosis |
| RIPK1 | necroptosis |
| RNASE1 | necroptosis |
| RPS6KA1 | necroptosis |
| RPS6KB1 | necroptosis |
| SHC1 | necroptosis |
| SLTM | necroptosis |
| SMPD1 | necroptosis |
| SP1 | necroptosis |
| STAT1 | necroptosis |
| SYK | necroptosis |
| TAB1 | necroptosis |
| TAB2 | necroptosis |
| TGFB1 | necroptosis |
| TNF | necroptosis |
| TNFAIP3 | necroptosis |
| TNFRSF1A | necroptosis |
| TNFRSF25 | necroptosis |
| TNFRSF6B | necroptosis |
| TNFSF10 | necroptosis |
| TP53 | necroptosis |
| TXN | necroptosis |
| PTPN13 | necroptosis |
| MYC | necroptosis |
| DAXX | necroptosis |
| RNASE3 | necroptosis |
| HRAS | necroptosis |
| PIK3R1 | necroptosis |
| PTK2 | necroptosis |
| CREBBP | necroptosis |
| TGFB2 | necroptosis |
| BAX | necroptosis |
| HDAC3 | necroptosis |
| CEBPA | necroptosis |
| DEDD | necroptosis |
| ELK1 | necroptosis |
| GSN | necroptosis |
| LMNA | necroptosis |
| NUMA1 | necroptosis |
| TGFBR1 | necroptosis |
| MAP3K1 | necroptosis |
| ACTG1 | necroptosis |
| CYLD | necroptosis |
| MAP3K7 | necroptosis |
| RALBP1 | necroptosis |
| DFFB | necroptosis |
| PIK3R3 | necroptosis |
| MAPK13 | necroptosis |
| TPX2 | necroptosis |
| EP300 | necroptosis |
| ETS1 | necroptosis |
| BIRC2 | necroptosis |
| BIRC3 | necroptosis |
| TNFRSF1B | necroptosis |
| MAP2K1 | necroptosis |
| MAPK7 | necroptosis |
| PRKCA | necroptosis |
| RPS6KA2 | necroptosis |
| RPS6KA3 | necroptosis |
| BAK1 | necroptosis |
| CASP9 | necroptosis |
| DIABLO | necroptosis |
| XIAP | necroptosis |
| SRC | necroptosis |
| CDK11B | necroptosis |
| KCNH4 | necroptosis |
| MAP2K5 | necroptosis |
| MAP3K11 | necroptosis |
| MAP3K2 | necroptosis |
| MAPK8IP2 | necroptosis |
| MAPK9 | necroptosis |
| MKNK1 | necroptosis |
| NR0B2 | necroptosis |
| PFN1 | necroptosis |
| RAC1 | necroptosis |
| RACK1 | necroptosis |
| SQSTM1 | necroptosis |
| TNFRSF10B | necroptosis |
| TNFSF12 | necroptosis |
| TNIK | necroptosis |
| APAF1 | necroptosis |
| PSEN2 | necroptosis |
| PRKDC | necroptosis |
| FADD | necroptosis |
| PRKCD | necroptosis |
| PRKCQ | necroptosis |
| MAP3K8 | necroptosis |
| ARAF | necroptosis |
| CASP10 | necroptosis |
| ETFA | necroptosis |
| GDNF | necroptosis |
| MADD | necroptosis |
| MAP4K4 | necroptosis |
| MAPK4 | necroptosis |
| PDPK1 | necroptosis |
| CFLAR | necroptosis |
| TRAF2 | necroptosis |
| ETS2 | necroptosis |
| MEF2D | necroptosis |
| RPS6KB2 | necroptosis |
| BAG4 | necroptosis |
| NFKBIB | necroptosis |
| PRKCH | necroptosis |
| PRKCI | necroptosis |
| CASP7 | necroptosis |
| IKBKB | necroptosis |
| TRAF6 | necroptosis |
| PRKCZ | necroptosis |
| ARHGDIB | necroptosis |
| FAF1 | necroptosis |
| MAP3K5 | necroptosis |
| MAP4K1 | necroptosis |
| MAPK8IP1 | necroptosis |
| PPP2CA | necroptosis |
| RFC1 | necroptosis |
| ROCK1 | necroptosis |
| SLC19A1 | necroptosis |
| SPTAN1 | necroptosis |
| TGFB3 | necroptosis |
| TNFRSF10A | necroptosis |
| MAP2K4 | necroptosis |
| MAP2K2 | necroptosis |
| MAPK10 | necroptosis |
| MAP3K13 | necroptosis |
| PFN2 | necroptosis |
| MAP3K4 | necroptosis |
| MAP3K9 | necroptosis |
| PIK3R2 | necroptosis |
| MAP4K3 | necroptosis |
| NCS1 | necroptosis |
| DFFA | necroptosis |
| MAPK6 | necroptosis |
| RPS6KA4 | necroptosis |
| RPS6KA5 | necroptosis |
| CDK2AP1 | necroptosis |
| HOXA7 | necroptosis |
| PAK2 | necroptosis |
| TRAF1 | necroptosis |
| MAPKAPK5 | necroptosis |
| CASP2 | necroptosis |
| CRADD | necroptosis |
| GRB2 | necroptosis |
| CLTC | necroptosis |
| MAPK12 | necroptosis |
| NRK | necroptosis |
| TUFM | necroptosis |
| LMNB1 | necroptosis |
| MAP3K3 | necroptosis |
| PRKCE | necroptosis |
| PKN1 | necroptosis |
| MAP3K14 | necroptosis |
| MAP4K5 | necroptosis |
| MAP3K10 | necroptosis |
| MEF2A | necroptosis |
| NFAT5 | necroptosis |
| LMNB2 | necroptosis |
| MAP2K3 | necroptosis |
| MKNK2 | necroptosis |
| MAP3K12 | necroptosis |
| MAP2K6 | necroptosis |
| TANK | necroptosis |
| CASP8AP2 | necroptosis |
| CSNK1A1 | necroptosis |
| TONSL | necroptosis |
| TRADD | necroptosis |
| MEF2C | necroptosis |
| CDK11A | necroptosis |
| GAS2 | necroptosis |
| MAPK11 | necroptosis |
| SMPD2 | necroptosis |
| MAP3K6 | necroptosis |
| B4GALNT2 | necroptosis |
| MAPKAPK3 | necroptosis |
| ALG2 | necroptosis |
| BFAR | necroptosis |
| NFKBIE | necroptosis |
| NFKBIL1 | necroptosis |
| BORCS8-MEF2B | necroptosis |
| CD7 | necroptosis |
| DEDD2 | necroptosis |
| MAP4K2 | necroptosis |
| MAPK8IP3 | necroptosis |
| NSMAF | necroptosis |
| PRKCG | necroptosis |
| RAPGEF2 | necroptosis |
| RFFL | necroptosis |
| MLKL | necroptosis |
| RIPK3 | necroptosis |
| TLR3 | necroptosis |
| GLUD1 | necroptosis |
| GLUD2 | necroptosis |
| ALOX15 | necroptosis |
| FTH1 | necroptosis |
| PYG | necroptosis |
| CAPN1 | necroptosis |
| CASP1 | necroptosis |
| GLNA | necroptosis |
| PPIA | necroptosis |
| CAPN2 | necroptosis |
| HSP90A | necroptosis |
| TNFSF6 | necroptosis |
| TNFRSF6 | necroptosis |
| JNK | necroptosis |
| JAK2 | necroptosis |
| CAMK2 | necroptosis |
| IL1B | necroptosis |
| IFNG | necroptosis |
| STAT3 | necroptosis |
| IRF9 | necroptosis |
| AIFM1 | necroptosis |
| TRPM7 | necroptosis |
| IFNAR1 | necroptosis |
| IFNAR2 | necroptosis |
| IFNGR1 | necroptosis |
| IFNGR2 | necroptosis |
| TIRP | necroptosis |
| IFNA | necroptosis |
| IFNB | necroptosis |
| TRIF | necroptosis |
| VDAC1 | necroptosis |
| SLC25A4S | necroptosis |
| PPID | necroptosis |
| TRAF5 | necroptosis |
| TLR4 | necroptosis |
| RBCK1 | necroptosis |
| HMGB1 | necroptosis |
| JAK1 | necroptosis |
| JAK3 | necroptosis |
| TYK2 | necroptosis |
| STAT2 | necroptosis |
| STAT4 | necroptosis |
| STAT5A | necroptosis |
| STAT5B | necroptosis |
| STAT6 | necroptosis |
| H2A | necroptosis |
| RNF31 | necroptosis |
| CHMP2A | necroptosis |
| CHMP2B | necroptosis |
| VPS24 | necroptosis |
| CHMP4A | necroptosis |
| CHMP4B | necroptosis |
| CHMP6 | necroptosis |
| VPS4 | necroptosis |
| CHMP1 | necroptosis |
| CHMP5 | necroptosis |
| PYCARD | necroptosis |
| NLRP3 | necroptosis |
| ZBP1 | necroptosis |
| IL33 | necroptosis |
| FTL | necroptosis |
| VDAC2 | necroptosis |
| VDAC3 | necroptosis |
| CHMP7 | necroptosis |
| PGAM5 | necroptosis |
| EIF2AK2 | necroptosis |
| PLA2G4 | necroptosis |
| DNM1L | necroptosis |
| SPATA2 | necroptosis |
| SHARPIN | necroptosis |
| NOX2 | necroptosis |
| USP21 | necroptosis |
| CHMP4C | necroptosis |
| ABCB6 | mpt |
| ACADM | mpt |
| APP | mpt |
| ATF2 | mpt |
| B2M | mpt |
| BCL2 | mpt |
| BID | mpt |
| CASP8 | mpt |
| CCK | mpt |
| DECR1 | mpt |
| EIF2AK1 | mpt |
| F3 | mpt |
| FLVCR1 | mpt |
| FXN | mpt |
| GCLC | mpt |
| GZMB | mpt |
| HAMP | mpt |
| HIF1A | mpt |
| HMOX1 | mpt |
| HMOX2 | mpt |
| KDR | mpt |
| LCN2 | mpt |
| LTF | mpt |
| MAPK8 | mpt |
| MT2A | mpt |
| P2RX7 | mpt |
| PMAIP1 | mpt |
| PRKN | mpt |
| S100A8 | mpt |
| S100A9 | mpt |
| SLC11A1 | mpt |
| SLC11A2 | mpt |
| SOD1 | mpt |
| SRI | mpt |
| TF | mpt |
| TFDP1 | mpt |
| TFRC | mpt |
| TP53 | mpt |
| TP63 | mpt |
| TSPO | mpt |
| YWHAE | mpt |
| YWHAQ | mpt |
| MYC | mpt |
| SLC39A6 | mpt |
| BAX | mpt |
| ATP7A | mpt |
| DCN | mpt |
| MMUT | mpt |
| SFXN1 | mpt |
| BNIP3 | mpt |
| ATP7B | mpt |
| YWHAZ | mpt |
| E2F1 | mpt |
| GCLM | mpt |
| HYAL2 | mpt |
| SMAD4 | mpt |
| CP | mpt |
| BAD | mpt |
| BBC3 | mpt |
| XIAP | mpt |
| ARF1 | mpt |
| SRC | mpt |
| TP73 | mpt |
| ABCG2 | mpt |
| ANXA6 | mpt |
| BCAP31 | mpt |
| BNIP3L | mpt |
| EPAS1 | mpt |
| FTH1 | mpt |
| NGFR | mpt |
| NOL3 | mpt |
| RACK1 | mpt |
| SLC22A17 | mpt |
| SLC9A1 | mpt |
| TMPRSS6 | mpt |
| FIS1 | mpt |
| ALOX12 | mpt |
| EIF2AK2 | mpt |
| GDNF | mpt |
| LRRK2 | mpt |
| DYNLL1 | mpt |
| TP53BP2 | mpt |
| ECHS1 | mpt |
| PCCA | mpt |
| SFN | mpt |
| BCL2L11 | mpt |
| FBXL5 | mpt |
| GDF2 | mpt |
| HFE | mpt |
| MELTF | mpt |
| MT3 | mpt |
| NAIF1 | mpt |
| NEO1 | mpt |
| PRNP | mpt |
| SCO2 | mpt |
| SLC25A37 | mpt |
| TGM2 | mpt |
| COMMD1 | mpt |
| FTL | mpt |
| MICU1 | mpt |
| THEM4 | mpt |
| TMC8 | mpt |
| BTBD9 | mpt |
| HJV | mpt |
| LCK | mpt |
| ACADL | mpt |
| SLC30A7 | mpt |
| YWHAG | mpt |
| BMF | mpt |
| BMP6 | mpt |
| EYA2 | mpt |
| MOAP1 | mpt |
| SCARA5 | mpt |
| SLC39A5 | mpt |
| NMT1 | mpt |
| CAMK2A | mpt |
| MLLT11 | mpt |
| RTL10 | mpt |
| PPP1R13B | mpt |
| SLC39A10 | mpt |
| STEAP3 | mpt |
| DYNLL2 | mpt |
| RHAG | mpt |
| STEAP1 | mpt |
| YWHAH | mpt |
| SLC39A4 | mpt |
| HADHA | mpt |
| HADHB | mpt |
| ATOX1 | mpt |
| IMMT | mpt |
| IREB2 | mpt |
| RAP1GDS1 | mpt |
| SLC30A1 | mpt |
| SLC30A4 | mpt |
| SLC31A1 | mpt |
| STEAP2 | mpt |
| STEAP4 | mpt |
| TTC7A | mpt |
| SLC8B1 | mpt |
| ACADS | mpt |
| ACO1 | mpt |
| BDH2 | mpt |
| SLC31A2 | mpt |
| ATP2C1 | mpt |
| DISC1 | mpt |
| SLC46A1 | mpt |
| ECI1 | mpt |
| MTCH2 | mpt |
| SLC39A7 | mpt |
| ALAS2 | mpt |
| HPX | mpt |
| TFR2 | mpt |
| ACAA2 | mpt |
| ISCU | mpt |
| MCUR1 | mpt |
| NDFIP1 | mpt |
| SLC39A14 | mpt |
| PCCB | mpt |
| CYBRD1 | mpt |
| NUBP1 | mpt |
| SLC39A8 | mpt |
| FTHL17 | mpt |
| HEBP2 | mpt |
| HADH | mpt |
| PPP3CC | mpt |
| ABCB7 | mpt |
| SLC40A1 | mpt |
| PPP3R1 | mpt |
| HEPH | mpt |
| IFI6 | mpt |
| MCU | mpt |
| YWHAB | mpt |
| REXO2 | mpt |
| MCUB | mpt |
| CUTC | mpt |
| ATP2A1 | mpt |
| MCEE | mpt |
| ACADVL | mpt |
| BLOC1S2 | mpt |
| CCDC22 | mpt |
| EPB42 | mpt |
| ERFE | mpt |
| FTH1P19 | mpt |
| FTMT | mpt |
| HSH2D | mpt |
| MICU2 | mpt |
| MYOC | mpt |
| PICALM | mpt |
| PPP2R3C | mpt |
| PRND | mpt |
| RHOT1 | mpt |
| RHOT2 | mpt |
| SCO1 | mpt |
| SFXN2 | mpt |
| SFXN3 | mpt |
| SFXN4 | mpt |
| SFXN5 | mpt |
| SLC25A28 | mpt |
| SLC30A5 | mpt |
| SLC30A8 | mpt |
| SLC39A12 | mpt |
| SLC39A13 | mpt |
| SLC8A3 | mpt |
| SMDT1 | mpt |
| AAAS | mitotic_cd |
| ABCB1 | mitotic_cd |
| ABCC2 | mitotic_cd |
| ABL1 | mitotic_cd |
| ADAM17 | mitotic_cd |
| AGFG1 | mitotic_cd |
| AHI1 | mitotic_cd |
| AKAP13 | mitotic_cd |
| AKT1 | mitotic_cd |
| ANXA1 | mitotic_cd |
| AOC3 | mitotic_cd |
| APC | mitotic_cd |
| APEX1 | mitotic_cd |
| APEX2 | mitotic_cd |
| APP | mitotic_cd |
| ASIP | mitotic_cd |
| ASXL1 | mitotic_cd |
| ATF2 | mitotic_cd |
| ATM | mitotic_cd |
| ATR | mitotic_cd |
| BCL2 | mitotic_cd |
| BCL2L1 | mitotic_cd |
| BID | mitotic_cd |
| BMP2 | mitotic_cd |
| BRCA1 | mitotic_cd |
| BRCA2 | mitotic_cd |
| BRD4 | mitotic_cd |
| BTG3 | mitotic_cd |
| CADM1 | mitotic_cd |
| CALD1 | mitotic_cd |
| CASP3 | mitotic_cd |
| CCDC88A | mitotic_cd |
| CD28 | mitotic_cd |
| CD2AP | mitotic_cd |
| CDC42 | mitotic_cd |
| CDCA7L | mitotic_cd |
| CDK4 | mitotic_cd |
| CDK7 | mitotic_cd |
| CDK9 | mitotic_cd |
| CDKN2A | mitotic_cd |
| CDKN3 | mitotic_cd |
| CENPJ | mitotic_cd |
| CEP250 | mitotic_cd |
| CFD | mitotic_cd |
| CFH | mitotic_cd |
| CIITA | mitotic_cd |
| CIT | mitotic_cd |
| CSNK2A1 | mitotic_cd |
| CSNK2A2 | mitotic_cd |
| CTNNB1 | mitotic_cd |
| CWC15 | mitotic_cd |
| DAPK3 | mitotic_cd |
| DNMT3A | mitotic_cd |
| DR1 | mitotic_cd |
| DSP | mitotic_cd |
| DUSP4 | mitotic_cd |
| EBI3 | mitotic_cd |
| ECD | mitotic_cd |
| EDN1 | mitotic_cd |
| EDN3 | mitotic_cd |
| EGF | mitotic_cd |
| EGFR | mitotic_cd |
| EIF4EBP1 | mitotic_cd |
| EMP1 | mitotic_cd |
| ERCC2 | mitotic_cd |
| EZH2 | mitotic_cd |
| FAP | mitotic_cd |
| FGF2 | mitotic_cd |
| FRZB | mitotic_cd |
| GADD45B | mitotic_cd |
| GDF15 | mitotic_cd |
| GEN1 | mitotic_cd |
| GIGYF2 | mitotic_cd |
| GML | mitotic_cd |
| GOT1 | mitotic_cd |
| GPNMB | mitotic_cd |
| GRK6 | mitotic_cd |
| GSK3B | mitotic_cd |
| HDAC2 | mitotic_cd |
| HGF | mitotic_cd |
| HIF1A | mitotic_cd |
| HLA-DOA | mitotic_cd |
| HMGA2 | mitotic_cd |
| HMGCR | mitotic_cd |
| HNF4A | mitotic_cd |
| HSP90AA1 | mitotic_cd |
| HSPB8 | mitotic_cd |
| IDO1 | mitotic_cd |
| IFIT1 | mitotic_cd |
| IFIT2 | mitotic_cd |
| IGF1 | mitotic_cd |
| IL1A | mitotic_cd |
| IL1B | mitotic_cd |
| IL6 | mitotic_cd |
| INS | mitotic_cd |
| IVNS1ABP | mitotic_cd |
| JTB | mitotic_cd |
| KDM5B | mitotic_cd |
| KRAS | mitotic_cd |
| LNPK | mitotic_cd |
| MAX | mitotic_cd |
| MCIDAS | mitotic_cd |
| MDM2 | mitotic_cd |
| MET | mitotic_cd |
| MKI67 | mitotic_cd |
| MNAT1 | mitotic_cd |
| MNT | mitotic_cd |
| MUC1 | mitotic_cd |
| MYCBP2 | mitotic_cd |
| NBN | mitotic_cd |
| NBPF10 | mitotic_cd |
| NCAPG2 | mitotic_cd |
| NFE2L2 | mitotic_cd |
| NFIA | mitotic_cd |
| NINL | mitotic_cd |
| NLRP2 | mitotic_cd |
| NOS1 | mitotic_cd |
| NPAT | mitotic_cd |
| NPM1 | mitotic_cd |
| NR3C1 | mitotic_cd |
| NUP35 | mitotic_cd |
| NUSAP1 | mitotic_cd |
| PAFAH1B1 | mitotic_cd |
| PAK1 | mitotic_cd |
| PANK2 | mitotic_cd |
| PDGFB | mitotic_cd |
| PHB2 | mitotic_cd |
| PIK3CD | mitotic_cd |
| PLAU | mitotic_cd |
| PLK3 | mitotic_cd |
| POC1A | mitotic_cd |
| POLD1 | mitotic_cd |
| PPP1CA | mitotic_cd |
| PPP1R10 | mitotic_cd |
| PRCC | mitotic_cd |
| PRKCB | mitotic_cd |
| PSEN1 | mitotic_cd |
| PSMB5 | mitotic_cd |
| PSMB7 | mitotic_cd |
| PSMD1 | mitotic_cd |
| PSMD2 | mitotic_cd |
| PSMD8 | mitotic_cd |
| PSME3 | mitotic_cd |
| PTEN | mitotic_cd |
| PTPA | mitotic_cd |
| PTPN11 | mitotic_cd |
| PTPN6 | mitotic_cd |
| RAB11A | mitotic_cd |
| RAB1A | mitotic_cd |
| RASA1 | mitotic_cd |
| RB1 | mitotic_cd |
| RERE | mitotic_cd |
| RNPC3 | mitotic_cd |
| RPS6KB1 | mitotic_cd |
| RRM2 | mitotic_cd |
| RUNX1 | mitotic_cd |
| SDC1 | mitotic_cd |
| SDCBP | mitotic_cd |
| SERTAD2 | mitotic_cd |
| SH2B1 | mitotic_cd |
| SHC1 | mitotic_cd |
| SIK1 | mitotic_cd |
| SINHCAF | mitotic_cd |
| SIRT1 | mitotic_cd |
| SIRT2 | mitotic_cd |
| SIRT7 | mitotic_cd |
| SLTM | mitotic_cd |
| SMARCB1 | mitotic_cd |
| SMC2 | mitotic_cd |
| SOS1 | mitotic_cd |
| SP1 | mitotic_cd |
| SPAG5 | mitotic_cd |
| SRF | mitotic_cd |
| STAT1 | mitotic_cd |
| STAT5B | mitotic_cd |
| STIL | mitotic_cd |
| STK26 | mitotic_cd |
| TFDP1 | mitotic_cd |
| TFDP2 | mitotic_cd |
| TGFB1 | mitotic_cd |
| TIMP1 | mitotic_cd |
| TLE3 | mitotic_cd |
| TP53 | mitotic_cd |
| TP63 | mitotic_cd |
| TXNRD1 | mitotic_cd |
| TYMS | mitotic_cd |
| UBXN11 | mitotic_cd |
| UNG | mitotic_cd |
| UQCC1 | mitotic_cd |
| USP13 | mitotic_cd |
| USP9X | mitotic_cd |
| VCAM1 | mitotic_cd |
| XPO1 | mitotic_cd |
| YWHAE | mitotic_cd |
| YWHAQ | mitotic_cd |
| ZBTB17 | mitotic_cd |
| KIF20B | mitotic_cd |
| KPNA2 | mitotic_cd |
| SPRY2 | mitotic_cd |
| INTS13 | mitotic_cd |
| NES | mitotic_cd |
| SLC22A3 | mitotic_cd |
| UVRAG | mitotic_cd |
| MYC | mitotic_cd |
| CDKN1C | mitotic_cd |
| INSR | mitotic_cd |
| ATRX | mitotic_cd |
| DCTN6 | mitotic_cd |
| IGF2 | mitotic_cd |
| INSM1 | mitotic_cd |
| MEN1 | mitotic_cd |
| PSMD9 | mitotic_cd |
| TICAM2 | mitotic_cd |
| CCND1 | mitotic_cd |
| MCM2 | mitotic_cd |
| CDK6 | mitotic_cd |
| LRIG1 | mitotic_cd |
| MCM7 | mitotic_cd |
| TGFA | mitotic_cd |
| AURKA | mitotic_cd |
| BIRC5 | mitotic_cd |
| RACGAP1 | mitotic_cd |
| UBB | mitotic_cd |
| SOX4 | mitotic_cd |
| POLE | mitotic_cd |
| SMAD2 | mitotic_cd |
| XRCC2 | mitotic_cd |
| HRAS | mitotic_cd |
| PPP2R1A | mitotic_cd |
| BARD1 | mitotic_cd |
| INHBA | mitotic_cd |
| HSPA8 | mitotic_cd |
| CDKN1B | mitotic_cd |
| RHOU | mitotic_cd |
| SMAD3 | mitotic_cd |
| XRCC3 | mitotic_cd |
| BUB1B | mitotic_cd |
| CDC20 | mitotic_cd |
| CHEK1 | mitotic_cd |
| FOXM1 | mitotic_cd |
| MAD2L1 | mitotic_cd |
| MCM10 | mitotic_cd |
| PLK1 | mitotic_cd |
| CCNE1 | mitotic_cd |
| CREBBP | mitotic_cd |
| EIF4E | mitotic_cd |
| HDAC1 | mitotic_cd |
| HSPA2 | mitotic_cd |
| NCOA3 | mitotic_cd |
| SKP2 | mitotic_cd |
| STAG2 | mitotic_cd |
| TGFB2 | mitotic_cd |
| BAX | mitotic_cd |
| SH3GL2 | mitotic_cd |
| CDKN1A | mitotic_cd |
| CHEK2 | mitotic_cd |
| PCBP4 | mitotic_cd |
| ARHGEF7 | mitotic_cd |
| BRINP1 | mitotic_cd |
| CCAR2 | mitotic_cd |
| CCN4 | mitotic_cd |
| CD24 | mitotic_cd |
| CKS1B | mitotic_cd |
| CUL1 | mitotic_cd |
| DEPDC1 | mitotic_cd |
| DUSP1 | mitotic_cd |
| FOXA1 | mitotic_cd |
| GEM | mitotic_cd |
| KAT2A | mitotic_cd |
| KAT2B | mitotic_cd |
| LMLN | mitotic_cd |
| LMNA | mitotic_cd |
| MALAT1 | mitotic_cd |
| MSH2 | mitotic_cd |
| NEAT1 | mitotic_cd |
| NUMA1 | mitotic_cd |
| PDGFRB | mitotic_cd |
| PINX1 | mitotic_cd |
| PRMT5 | mitotic_cd |
| RING1 | mitotic_cd |
| RNF2 | mitotic_cd |
| STMN1 | mitotic_cd |
| TOMM34 | mitotic_cd |
| SMARCA4 | mitotic_cd |
| PSMB9 | mitotic_cd |
| PCNA | mitotic_cd |
| TSC22D1 | mitotic_cd |
| G0S2 | mitotic_cd |
| PTCH1 | mitotic_cd |
| CDK2 | mitotic_cd |
| PLK2 | mitotic_cd |
| ADGRE5 | mitotic_cd |
| CCNH | mitotic_cd |
| CYLD | mitotic_cd |
| EMD | mitotic_cd |
| ID4 | mitotic_cd |
| PDGFA | mitotic_cd |
| PSMA4 | mitotic_cd |
| PSME1 | mitotic_cd |
| RAN | mitotic_cd |
| RHOA | mitotic_cd |
| UBE2I | mitotic_cd |
| YWHAZ | mitotic_cd |
| ANTXR1 | mitotic_cd |
| FGF13 | mitotic_cd |
| C6 | mitotic_cd |
| CTC1 | mitotic_cd |
| ITGB1 | mitotic_cd |
| TIMP2 | mitotic_cd |
| MRE11 | mitotic_cd |
| ATF7IP | mitotic_cd |
| DMRT1 | mitotic_cd |
| ERCC4 | mitotic_cd |
| PSMD12 | mitotic_cd |
| RTEL1 | mitotic_cd |
| TAL1 | mitotic_cd |
| CDH13 | mitotic_cd |
| AKIRIN2 | mitotic_cd |
| ZBTB7A | mitotic_cd |
| ANP32E | mitotic_cd |
| ATAD2 | mitotic_cd |
| CCNB1 | mitotic_cd |
| CCNE2 | mitotic_cd |
| CDK1 | mitotic_cd |
| CENPA | mitotic_cd |
| CENPU | mitotic_cd |
| E2F1 | mitotic_cd |
| ERCC6L | mitotic_cd |
| FANCI | mitotic_cd |
| FBXO5 | mitotic_cd |
| GMNN | mitotic_cd |
| GTSE1 | mitotic_cd |
| KIF11 | mitotic_cd |
| KIF14 | mitotic_cd |
| KIF15 | mitotic_cd |
| KIF4A | mitotic_cd |
| KIFC1 | mitotic_cd |
| MAPK13 | mitotic_cd |
| MELK | mitotic_cd |
| NCAPG | mitotic_cd |
| NEK2 | mitotic_cd |
| PTTG1 | mitotic_cd |
| RAD51AP1 | mitotic_cd |
| TACC3 | mitotic_cd |
| TOP2A | mitotic_cd |
| TPX2 | mitotic_cd |
| TTK | mitotic_cd |
| BHLHE40 | mitotic_cd |
| BRCC3 | mitotic_cd |
| BRIP1 | mitotic_cd |
| CCND2 | mitotic_cd |
| CCNG2 | mitotic_cd |
| CDCA7 | mitotic_cd |
| EP300 | mitotic_cd |
| FANCA | mitotic_cd |
| GCLM | mitotic_cd |
| GINS2 | mitotic_cd |
| HES1 | mitotic_cd |
| JAG2 | mitotic_cd |
| PIM1 | mitotic_cd |
| PIMREG | mitotic_cd |
| PKD1 | mitotic_cd |
| RFC3 | mitotic_cd |
| RPA1 | mitotic_cd |
| RSRC2 | mitotic_cd |
| SFPQ | mitotic_cd |
| SMAD4 | mitotic_cd |
| TCF3 | mitotic_cd |
| BIRC2 | mitotic_cd |
| BIRC3 | mitotic_cd |
| PRKCA | mitotic_cd |
| BAG3 | mitotic_cd |
| FOXC1 | mitotic_cd |
| NUP62 | mitotic_cd |
| SMARCD3 | mitotic_cd |
| XIAP | mitotic_cd |
| CTSD | mitotic_cd |
| CDC27 | mitotic_cd |
| BTG2 | mitotic_cd |
| CDC25C | mitotic_cd |
| CNOT9 | mitotic_cd |
| GADD45A | mitotic_cd |
| MDM4 | mitotic_cd |
| PML | mitotic_cd |
| PRMT1 | mitotic_cd |
| SMC1A | mitotic_cd |
| TP73 | mitotic_cd |
| ACVR1 | mitotic_cd |
| ACVR1B | mitotic_cd |
| ARHGEF2 | mitotic_cd |
| ASPM | mitotic_cd |
| BABAM1 | mitotic_cd |
| BABAM2 | mitotic_cd |
| BECN1 | mitotic_cd |
| BMI1 | mitotic_cd |
| BRD7 | mitotic_cd |
| BTRC | mitotic_cd |
| CBX3 | mitotic_cd |
| CCNG1 | mitotic_cd |
| CDC25B | mitotic_cd |
| CDC7 | mitotic_cd |
| CDK11B | mitotic_cd |
| CDK13 | mitotic_cd |
| CDKN2B | mitotic_cd |
| CENPK | mitotic_cd |
| CHMP2B | mitotic_cd |
| CHMP3 | mitotic_cd |
| CIB1 | mitotic_cd |
| CIP2A | mitotic_cd |
| CRK | mitotic_cd |
| CTNND1 | mitotic_cd |
| DEK | mitotic_cd |
| DIAPH3 | mitotic_cd |
| E2F2 | mitotic_cd |
| E2F6 | mitotic_cd |
| ECT2 | mitotic_cd |
| EREG | mitotic_cd |
| FANCD2 | mitotic_cd |
| FLNA | mitotic_cd |
| FOXO4 | mitotic_cd |
| GAS1 | mitotic_cd |
| GAS6 | mitotic_cd |
| GLI1 | mitotic_cd |
| GORASP1 | mitotic_cd |
| H2AX | mitotic_cd |
| KDM8 | mitotic_cd |
| KHDRBS1 | mitotic_cd |
| KIF22 | mitotic_cd |
| LATS1 | mitotic_cd |
| LIN9 | mitotic_cd |
| LINC00339 | mitotic_cd |
| LONP1 | mitotic_cd |
| LPIN1 | mitotic_cd |
| LRP5 | mitotic_cd |
| MAP3K2 | mitotic_cd |
| MTBP | mitotic_cd |
| MZF1 | mitotic_cd |
| NCAPD2 | mitotic_cd |
| NEDD9 | mitotic_cd |
| NFIB | mitotic_cd |
| NUP98 | mitotic_cd |
| PAK4 | mitotic_cd |
| PARD3 | mitotic_cd |
| PDPN | mitotic_cd |
| PIN1 | mitotic_cd |
| PKD2 | mitotic_cd |
| PKN2 | mitotic_cd |
| PRKD2 | mitotic_cd |
| PSMD14 | mitotic_cd |
| PTPN3 | mitotic_cd |
| PTTG3P | mitotic_cd |
| RAD51 | mitotic_cd |
| RAD51B | mitotic_cd |
| RECQL5 | mitotic_cd |
| RGS3 | mitotic_cd |
| RNF8 | mitotic_cd |
| RPS27 | mitotic_cd |
| RRM1 | mitotic_cd |
| SENP2 | mitotic_cd |
| SIN3A | mitotic_cd |
| SKA1 | mitotic_cd |
| SLC9A3R1 | mitotic_cd |
| SPDYA | mitotic_cd |
| SPHK1 | mitotic_cd |
| SPRY1 | mitotic_cd |
| SRD5A1 | mitotic_cd |
| SRSF3 | mitotic_cd |
| TIPIN | mitotic_cd |
| TNKS | mitotic_cd |
| TRA2A | mitotic_cd |
| TRIM59 | mitotic_cd |
| UBR7 | mitotic_cd |
| USP2 | mitotic_cd |
| WEE1 | mitotic_cd |
| WNT10B | mitotic_cd |
| WWC1 | mitotic_cd |
| XPC | mitotic_cd |
| ZFX | mitotic_cd |
| BUB1 | mitotic_cd |
| CEP55 | mitotic_cd |
| PBK | mitotic_cd |
| UBE2C | mitotic_cd |
| CCND3 | mitotic_cd |
| MCM5 | mitotic_cd |
| ANLN | mitotic_cd |
| CEP72 | mitotic_cd |
| CLASP2 | mitotic_cd |
| CYP1A1 | mitotic_cd |
| NNMT | mitotic_cd |
| PLAG1 | mitotic_cd |
| POLD2 | mitotic_cd |
| PPM1D | mitotic_cd |
| RBX1 | mitotic_cd |
| RHEB | mitotic_cd |
| UHRF1 | mitotic_cd |
| PRKDC | mitotic_cd |
| SKP1 | mitotic_cd |
| MAU2 | mitotic_cd |
| FADD | mitotic_cd |
| CENPH | mitotic_cd |
| SLC44A2 | mitotic_cd |
| CDKN2C | mitotic_cd |
| CHFR | mitotic_cd |
| AURKB | mitotic_cd |
| TRIP13 | mitotic_cd |
| BMP4 | mitotic_cd |
| HSF2 | mitotic_cd |
| RCAN1 | mitotic_cd |
| RRS1 | mitotic_cd |
| TPR | mitotic_cd |
| PRKCQ | mitotic_cd |
| HIPK2 | mitotic_cd |
| BUB3 | mitotic_cd |
| CDC23 | mitotic_cd |
| RGCC | mitotic_cd |
| AFAP1L2 | mitotic_cd |
| AKAP9 | mitotic_cd |
| BLM | mitotic_cd |
| CBX5 | mitotic_cd |
| CDC73 | mitotic_cd |
| CETN1 | mitotic_cd |
| CTDSPL | mitotic_cd |
| FSD1 | mitotic_cd |
| FYN | mitotic_cd |
| GADD45G | mitotic_cd |
| GDNF | mitotic_cd |
| LTBP2 | mitotic_cd |
| MASTL | mitotic_cd |
| NCOA5 | mitotic_cd |
| PPP6C | mitotic_cd |
| PTMS | mitotic_cd |
| RAP1GAP | mitotic_cd |
| RBBP4 | mitotic_cd |
| RCC1 | mitotic_cd |
| SEC62 | mitotic_cd |
| SPC24 | mitotic_cd |
| STK17B | mitotic_cd |
| TCF7L1 | mitotic_cd |
| TFF3 | mitotic_cd |
| TSG101 | mitotic_cd |
| TTF2 | mitotic_cd |
| YY1 | mitotic_cd |
| ZFAS1 | mitotic_cd |
| ZNF367 | mitotic_cd |
| CFLAR | mitotic_cd |
| LNPEP | mitotic_cd |
| PBRM1 | mitotic_cd |
| TUBB3 | mitotic_cd |
| PAK3 | mitotic_cd |
| CENPE | mitotic_cd |
| HMMR | mitotic_cd |
| RAD51C | mitotic_cd |
| RFWD3 | mitotic_cd |
| ADGRG6 | mitotic_cd |
| CALM1 | mitotic_cd |
| CALM2 | mitotic_cd |
| CALM3 | mitotic_cd |
| ENTPD5 | mitotic_cd |
| GSPT1 | mitotic_cd |
| MAD1L1 | mitotic_cd |
| PSMD10 | mitotic_cd |
| TEX14 | mitotic_cd |
| ZWILCH | mitotic_cd |
| CTCF | mitotic_cd |
| CDKN2D | mitotic_cd |
| FGF8 | mitotic_cd |
| PKNOX1 | mitotic_cd |
| PSMD7 | mitotic_cd |
| ASCL1 | mitotic_cd |
| DYNLL1 | mitotic_cd |
| ASNS | mitotic_cd |
| CCNA2 | mitotic_cd |
| CCNB2 | mitotic_cd |
| CDC6 | mitotic_cd |
| CDCA3 | mitotic_cd |
| CENPF | mitotic_cd |
| CKS2 | mitotic_cd |
| DLGAP5 | mitotic_cd |
| DTL | mitotic_cd |
| FEN1 | mitotic_cd |
| GINS4 | mitotic_cd |
| HELLS | mitotic_cd |
| HMGB2 | mitotic_cd |
| KIF20A | mitotic_cd |
| KIF23 | mitotic_cd |
| KIF2C | mitotic_cd |
| MYBL2 | mitotic_cd |
| NDC80 | mitotic_cd |
| OIP5 | mitotic_cd |
| PRC1 | mitotic_cd |
| RPA3 | mitotic_cd |
| SHCBP1 | mitotic_cd |
| TMPO | mitotic_cd |
| AMD1 | mitotic_cd |
| CDK10 | mitotic_cd |
| CTNNA1 | mitotic_cd |
| DCP1A | mitotic_cd |
| FBXO31 | mitotic_cd |
| GOLGA2 | mitotic_cd |
| GSE1 | mitotic_cd |
| HOXA10 | mitotic_cd |
| KANK2 | mitotic_cd |
| KDM4A | mitotic_cd |
| KLF9 | mitotic_cd |
| NASP | mitotic_cd |
| PHLDA1 | mitotic_cd |
| SRSF7 | mitotic_cd |
| SYF2 | mitotic_cd |
| TERF1 | mitotic_cd |
| VANGL1 | mitotic_cd |
| MAPRE1 | mitotic_cd |
| NEDD1 | mitotic_cd |
| FGA | mitotic_cd |
| RPRM | mitotic_cd |
| ANAPC1 | mitotic_cd |
| EPGN | mitotic_cd |
| PLAGL1 | mitotic_cd |
| SFN | mitotic_cd |
| UBA52 | mitotic_cd |
| ADAMTS1 | mitotic_cd |
| ADH4 | mitotic_cd |
| AFAP1 | mitotic_cd |
| AIF1 | mitotic_cd |
| ALKBH1 | mitotic_cd |
| ANP32B | mitotic_cd |
| ARHGDIB | mitotic_cd |
| ARHGEF39 | mitotic_cd |
| AURKC | mitotic_cd |
| BANF1 | mitotic_cd |
| BCAT1 | mitotic_cd |
| BIRC7 | mitotic_cd |
| BRINP3 | mitotic_cd |
| BTC | mitotic_cd |
| BTG4 | mitotic_cd |
| CACUL1 | mitotic_cd |
| CCDC8 | mitotic_cd |
| CCNY | mitotic_cd |
| CDCA5 | mitotic_cd |
| CDK5RAP3 | mitotic_cd |
| CENPO | mitotic_cd |
| CENPX | mitotic_cd |
| CERS6 | mitotic_cd |
| CHAF1A | mitotic_cd |
| CLSPN | mitotic_cd |
| CNN2 | mitotic_cd |
| COASY | mitotic_cd |
| COP1 | mitotic_cd |
| CREBRF | mitotic_cd |
| CREBZF | mitotic_cd |
| CTR9 | mitotic_cd |
| CUL4A | mitotic_cd |
| CUL4B | mitotic_cd |
| CXCL14 | mitotic_cd |
| DACT1 | mitotic_cd |
| DONSON | mitotic_cd |
| E2F3 | mitotic_cd |
| E2F5 | mitotic_cd |
| ENOSF1 | mitotic_cd |
| ERCC3 | mitotic_cd |
| ESCO2 | mitotic_cd |
| EXO1 | mitotic_cd |
| EYA1 | mitotic_cd |
| FAM83D | mitotic_cd |
| FBXL7 | mitotic_cd |
| FBXW5 | mitotic_cd |
| FHL1 | mitotic_cd |
| FLAD1 | mitotic_cd |
| FOXK2 | mitotic_cd |
| FZD3 | mitotic_cd |
| FZD9 | mitotic_cd |
| FZR1 | mitotic_cd |
| G3BP1 | mitotic_cd |
| GATA2 | mitotic_cd |
| HMGB3 | mitotic_cd |
| HORMAD1 | mitotic_cd |
| HSPA13 | mitotic_cd |
| IFNAR1 | mitotic_cd |
| ILF2 | mitotic_cd |
| INCENP | mitotic_cd |
| INPP5K | mitotic_cd |
| IQGAP3 | mitotic_cd |
| KIF2A | mitotic_cd |
| KLF11 | mitotic_cd |
| KLF6 | mitotic_cd |
| KMT5A | mitotic_cd |
| KNL1 | mitotic_cd |
| KNTC1 | mitotic_cd |
| LARP7 | mitotic_cd |
| LATS2 | mitotic_cd |
| LMO4 | mitotic_cd |
| MDC1 | mitotic_cd |
| MIIP | mitotic_cd |
| MITF | mitotic_cd |
| MTSS1 | mitotic_cd |
| NAB1 | mitotic_cd |
| NEK3 | mitotic_cd |
| NR5A2 | mitotic_cd |
| NUCKS1 | mitotic_cd |
| NUP37 | mitotic_cd |
| OGT | mitotic_cd |
| PAK5 | mitotic_cd |
| PAX6 | mitotic_cd |
| PBX1 | mitotic_cd |
| PCDH7 | mitotic_cd |
| PDXP | mitotic_cd |
| PHF8 | mitotic_cd |
| PIBF1 | mitotic_cd |
| PIM2 | mitotic_cd |
| PIM3 | mitotic_cd |
| PKMYT1 | mitotic_cd |
| PLK4 | mitotic_cd |
| PLS3 | mitotic_cd |
| PMEPA1 | mitotic_cd |
| PPAT | mitotic_cd |
| PPP1R12A | mitotic_cd |
| PPP2CA | mitotic_cd |
| PPP2R5E | mitotic_cd |
| PRR11 | mitotic_cd |
| PSMA1 | mitotic_cd |
| PSMA7 | mitotic_cd |
| PSMB8 | mitotic_cd |
| PSMC3 | mitotic_cd |
| PSMD4 | mitotic_cd |
| PTGER3 | mitotic_cd |
| PTPN9 | mitotic_cd |
| RAB23 | mitotic_cd |
| RANGAP1 | mitotic_cd |
| RBBP8 | mitotic_cd |
| RDX | mitotic_cd |
| RPS6 | mitotic_cd |
| SEM1 | mitotic_cd |
| SGO1 | mitotic_cd |
| SNX9 | mitotic_cd |
| STK24 | mitotic_cd |
| SUGT1 | mitotic_cd |
| TDG | mitotic_cd |
| TFAP2A | mitotic_cd |
| TGFB3 | mitotic_cd |
| TMEM8B | mitotic_cd |
| TNFAIP8L1 | mitotic_cd |
| TRIM32 | mitotic_cd |
| TROAP | mitotic_cd |
| TUBGCP5 | mitotic_cd |
| UBE2T | mitotic_cd |
| UNC5CL | mitotic_cd |
| USP22 | mitotic_cd |
| USP3 | mitotic_cd |
| USP44 | mitotic_cd |
| USP47 | mitotic_cd |
| VCL | mitotic_cd |
| VTA1 | mitotic_cd |
| WDR62 | mitotic_cd |
| WNT9A | mitotic_cd |
| YEATS4 | mitotic_cd |
| ZMYM1 | mitotic_cd |
| ZNF217 | mitotic_cd |
| ZNFX1 | mitotic_cd |
| NEK7 | mitotic_cd |
| CDC25A | mitotic_cd |
| LPP | mitotic_cd |
| MBD1 | mitotic_cd |
| NSUN2 | mitotic_cd |
| TOP1 | mitotic_cd |
| CHAF1B | mitotic_cd |
| CNOT7 | mitotic_cd |
| CNOT8 | mitotic_cd |
| CDC42EP4 | mitotic_cd |
| CDC45 | mitotic_cd |
| CDT1 | mitotic_cd |
| CEP135 | mitotic_cd |
| TOP2B | mitotic_cd |
| CCNA1 | mitotic_cd |
| FXR1 | mitotic_cd |
| NIPBL | mitotic_cd |
| RAD17 | mitotic_cd |
| PWP1 | mitotic_cd |
| E2F7 | mitotic_cd |
| RBL2 | mitotic_cd |
| ABCC5 | mitotic_cd |
| AJUBA | mitotic_cd |
| BMP7 | mitotic_cd |
| CUL3 | mitotic_cd |
| DCTN3 | mitotic_cd |
| DDB1 | mitotic_cd |
| DDX3X | mitotic_cd |
| DYNC1H1 | mitotic_cd |
| DYRK1A | mitotic_cd |
| ID2 | mitotic_cd |
| NFYA | mitotic_cd |
| POLD3 | mitotic_cd |
| RAD21 | mitotic_cd |
| RHPN1 | mitotic_cd |
| SDCCAG8 | mitotic_cd |
| SERPINB3 | mitotic_cd |
| SH3BP4 | mitotic_cd |
| SLC38A2 | mitotic_cd |
| SLFN11 | mitotic_cd |
| SMARCD1 | mitotic_cd |
| STAMBP | mitotic_cd |
| TUBB4B | mitotic_cd |
| POLQ | mitotic_cd |
| ARTN | mitotic_cd |
| COL7A1 | mitotic_cd |
| FGF10 | mitotic_cd |
| KNSTRN | mitotic_cd |
| OVOL1 | mitotic_cd |
| TAF15 | mitotic_cd |
| USP8 | mitotic_cd |
| AATF | mitotic_cd |
| RAD18 | mitotic_cd |
| EML4 | mitotic_cd |
| SPC25 | mitotic_cd |
| KIF5B | mitotic_cd |
| TTN | mitotic_cd |
| ANAPC11 | mitotic_cd |
| CNOT6 | mitotic_cd |
| BIRC6 | mitotic_cd |
| CENPP | mitotic_cd |
| MYH10 | mitotic_cd |
| NCS1 | mitotic_cd |
| PDS5B | mitotic_cd |
| PRDM5 | mitotic_cd |
| RFC4 | mitotic_cd |
| E2F8 | mitotic_cd |
| MCM4 | mitotic_cd |
| UBE2S | mitotic_cd |
| RFC2 | mitotic_cd |
| MAP4 | mitotic_cd |
| MISP | mitotic_cd |
| PTP4A1 | mitotic_cd |
| YWHAG | mitotic_cd |
| MAD2L2 | mitotic_cd |
| ABRAXAS2 | mitotic_cd |
| ARL6IP1 | mitotic_cd |
| CAPS | mitotic_cd |
| CAV2 | mitotic_cd |
| CDC34 | mitotic_cd |
| CDK14 | mitotic_cd |
| CDR2 | mitotic_cd |
| CEP126 | mitotic_cd |
| DLG1 | mitotic_cd |
| DNAJB6 | mitotic_cd |
| ESD | mitotic_cd |
| LTBP3 | mitotic_cd |
| LTO1 | mitotic_cd |
| MAGI2 | mitotic_cd |
| MBD4 | mitotic_cd |
| NABP1 | mitotic_cd |
| NRDC | mitotic_cd |
| PDCD6IP | mitotic_cd |
| PDS5A | mitotic_cd |
| PLRG1 | mitotic_cd |
| PSME2 | mitotic_cd |
| PTTG2 | mitotic_cd |
| RNF113A | mitotic_cd |
| SPTBN1 | mitotic_cd |
| TOM1L1 | mitotic_cd |
| VRK1 | mitotic_cd |
| WASL | mitotic_cd |
| MCM3 | mitotic_cd |
| NOLC1 | mitotic_cd |
| HRH1 | mitotic_cd |
| KIF3B | mitotic_cd |
| SLC6A4 | mitotic_cd |
| AP4B1 | mitotic_cd |
| ANAPC10 | mitotic_cd |
| E2F4 | mitotic_cd |
| PIDD1 | mitotic_cd |
| BRD8 | mitotic_cd |
| CAMK2A | mitotic_cd |
| CDCA2 | mitotic_cd |
| CETN3 | mitotic_cd |
| CUL2 | mitotic_cd |
| DKC1 | mitotic_cd |
| EPS8 | mitotic_cd |
| KCNH5 | mitotic_cd |
| LBR | mitotic_cd |
| MAPRE2 | mitotic_cd |
| MCPH1 | mitotic_cd |
| MPLKIP | mitotic_cd |
| NKX3-1 | mitotic_cd |
| PAK2 | mitotic_cd |
| PAK6 | mitotic_cd |
| PMS1 | mitotic_cd |
| POM121 | mitotic_cd |
| RAB8A | mitotic_cd |
| RBL1 | mitotic_cd |
| RECQL4 | mitotic_cd |
| SOCS2 | mitotic_cd |
| SRSF5 | mitotic_cd |
| STAG1 | mitotic_cd |
| UBE2D3 | mitotic_cd |
| UBE2D1 | mitotic_cd |
| SMTN | mitotic_cd |
| PNN | mitotic_cd |
| NMB | mitotic_cd |
| BCLAF1 | mitotic_cd |
| BRSK2 | mitotic_cd |
| CUL5 | mitotic_cd |
| DCLRE1A | mitotic_cd |
| FBXW11 | mitotic_cd |
| FER | mitotic_cd |
| GFI1 | mitotic_cd |
| MACF1 | mitotic_cd |
| OPN3 | mitotic_cd |
| POLD4 | mitotic_cd |
| PPP3CA | mitotic_cd |
| SKA2 | mitotic_cd |
| TAOK3 | mitotic_cd |
| TIMELESS | mitotic_cd |
| ITGB3BP | mitotic_cd |
| CASP2 | mitotic_cd |
| CUL7 | mitotic_cd |
| CRADD | mitotic_cd |
| FAM111B | mitotic_cd |
| CNOT2 | mitotic_cd |
| JADE1 | mitotic_cd |
| CLTC | mitotic_cd |
| RBM38 | mitotic_cd |
| ACD | mitotic_cd |
| ANAPC16 | mitotic_cd |
| BBS2 | mitotic_cd |
| CHMP1A | mitotic_cd |
| CHMP1B | mitotic_cd |
| CSNK1E | mitotic_cd |
| DNAJB1 | mitotic_cd |
| GABPB1 | mitotic_cd |
| GPSM2 | mitotic_cd |
| HAUS8 | mitotic_cd |
| HOXB4 | mitotic_cd |
| ITPR1 | mitotic_cd |
| LIG1 | mitotic_cd |
| MCM6 | mitotic_cd |
| NEK1 | mitotic_cd |
| NFIC | mitotic_cd |
| NUF2 | mitotic_cd |
| OPTN | mitotic_cd |
| PLIN3 | mitotic_cd |
| PSMB6 | mitotic_cd |
| SETDB2 | mitotic_cd |
| SLC39A10 | mitotic_cd |
| USP1 | mitotic_cd |
| PSMA5 | mitotic_cd |
| USH1C | mitotic_cd |
| ARID3A | mitotic_cd |
| UBC | mitotic_cd |
| RCC2 | mitotic_cd |
| SELENON | mitotic_cd |
| FOXN3 | mitotic_cd |
| ASF1B | mitotic_cd |
| CDCA8 | mitotic_cd |
| DTYMK | mitotic_cd |
| GINS1 | mitotic_cd |
| HJURP | mitotic_cd |
| JPT1 | mitotic_cd |
| LMNB1 | mitotic_cd |
| NCAPH | mitotic_cd |
| SMC4 | mitotic_cd |
| ZWINT | mitotic_cd |
| ATRIP | mitotic_cd |
| CCNK | mitotic_cd |
| PPP2R2A | mitotic_cd |
| RAD9A | mitotic_cd |
| YWHAH | mitotic_cd |
| TTC28 | mitotic_cd |
| DNM2 | mitotic_cd |
| CARM1 | mitotic_cd |
| CDC5L | mitotic_cd |
| DGKZ | mitotic_cd |
| RPS27A | mitotic_cd |
| TRIAP1 | mitotic_cd |
| BACH1 | mitotic_cd |
| CDK20 | mitotic_cd |
| CEP57 | mitotic_cd |
| CEP70 | mitotic_cd |
| CHMP4C | mitotic_cd |
| CYB5R2 | mitotic_cd |
| DEPDC1B | mitotic_cd |
| DLG5 | mitotic_cd |
| DUSP3 | mitotic_cd |
| EIF2S1 | mitotic_cd |
| EIF4EBP2 | mitotic_cd |
| FRS2 | mitotic_cd |
| GADD45GIP1 | mitotic_cd |
| HAUS6 | mitotic_cd |
| HCFC1 | mitotic_cd |
| HSD17B11 | mitotic_cd |
| HSPA1L | mitotic_cd |
| INTS7 | mitotic_cd |
| JMJD1C | mitotic_cd |
| KCNA5 | mitotic_cd |
| KIF18A | mitotic_cd |
| KIF2B | mitotic_cd |
| KPNB1 | mitotic_cd |
| LARP1 | mitotic_cd |
| LZTS2 | mitotic_cd |
| MAEA | mitotic_cd |
| MAP9 | mitotic_cd |
| MCM8 | mitotic_cd |
| MID1 | mitotic_cd |
| MNX1 | mitotic_cd |
| MRI1 | mitotic_cd |
| NCAPD3 | mitotic_cd |
| NEK6 | mitotic_cd |
| NUP153 | mitotic_cd |
| NUP43 | mitotic_cd |
| OLR1 | mitotic_cd |
| PCNT | mitotic_cd |
| PIF1 | mitotic_cd |
| PKN1 | mitotic_cd |
| POLA1 | mitotic_cd |
| PPP1CB | mitotic_cd |
| PPP1R2 | mitotic_cd |
| PPP5C | mitotic_cd |
| PRKACA | mitotic_cd |
| PRKAR2B | mitotic_cd |
| PSMB1 | mitotic_cd |
| PSMC6 | mitotic_cd |
| RCBTB2 | mitotic_cd |
| RCCD1 | mitotic_cd |
| RIDA | mitotic_cd |
| RMI1 | mitotic_cd |
| RNASEH2B | mitotic_cd |
| RNF20 | mitotic_cd |
| RNF40 | mitotic_cd |
| RNPS1 | mitotic_cd |
| SCRIB | mitotic_cd |
| SERPINA2 | mitotic_cd |
| SKA3 | mitotic_cd |
| SMC3 | mitotic_cd |
| SUCLG2 | mitotic_cd |
| SUN2 | mitotic_cd |
| SV2B | mitotic_cd |
| TFDP3 | mitotic_cd |
| TXNDC9 | mitotic_cd |
| ZPR1 | mitotic_cd |
| SLC25A15 | mitotic_cd |
| WSB1 | mitotic_cd |
| NEIL3 | mitotic_cd |
| NEUROG1 | mitotic_cd |
| THRAP3 | mitotic_cd |
| HUS1 | mitotic_cd |
| PPP2R5C | mitotic_cd |
| CDC14B | mitotic_cd |
| LIPH | mitotic_cd |
| NUP93 | mitotic_cd |
| PCM1 | mitotic_cd |
| THAP1 | mitotic_cd |
| ARHGEF10 | mitotic_cd |
| PSMD11 | mitotic_cd |
| TGIF1 | mitotic_cd |
| FANCG | mitotic_cd |
| DNA2 | mitotic_cd |
| SLC25A36 | mitotic_cd |
| CTDSP1 | mitotic_cd |
| HASPIN | mitotic_cd |
| INSIG2 | mitotic_cd |
| ME3 | mitotic_cd |
| NAE1 | mitotic_cd |
| OIT3 | mitotic_cd |
| PNPT1 | mitotic_cd |
| PSRC1 | mitotic_cd |
| RAD54L | mitotic_cd |
| RUVBL1 | mitotic_cd |
| TOPBP1 | mitotic_cd |
| TRIM69 | mitotic_cd |
| USP21 | mitotic_cd |
| ZNF281 | mitotic_cd |
| CDKL5 | mitotic_cd |
| PRPSAP1 | mitotic_cd |
| WEE2 | mitotic_cd |
| KCNC4 | mitotic_cd |
| CDK3 | mitotic_cd |
| CENPI | mitotic_cd |
| ANKLE2 | mitotic_cd |
| PRMT2 | mitotic_cd |
| TADA3 | mitotic_cd |
| ZNF365 | mitotic_cd |
| DHFR | mitotic_cd |
| ESPL1 | mitotic_cd |
| PHTF2 | mitotic_cd |
| POLA2 | mitotic_cd |
| LMNB2 | mitotic_cd |
| RBM8A | mitotic_cd |
| RPL13A | mitotic_cd |
| TUBB | mitotic_cd |
| TUBB2A | mitotic_cd |
| ADAM22 | mitotic_cd |
| CAMK2D | mitotic_cd |
| DNAJB4 | mitotic_cd |
| TPD52L1 | mitotic_cd |
| CNOT3 | mitotic_cd |
| AZI2 | mitotic_cd |
| C4BPB | mitotic_cd |
| CHAMP1 | mitotic_cd |
| CKAP5 | mitotic_cd |
| CRLS1 | mitotic_cd |
| DDIAS | mitotic_cd |
| ELP3 | mitotic_cd |
| FBXO7 | mitotic_cd |
| HLA-DRA | mitotic_cd |
| INO80 | mitotic_cd |
| NAA50 | mitotic_cd |
| NDC1 | mitotic_cd |
| NEK4 | mitotic_cd |
| NKTR | mitotic_cd |
| POLK | mitotic_cd |
| RPS3 | mitotic_cd |
| SHTN1 | mitotic_cd |
| TDP1 | mitotic_cd |
| TRIM45 | mitotic_cd |
| TRIM71 | mitotic_cd |
| TSN | mitotic_cd |
| TUBA4A | mitotic_cd |
| USP17L2 | mitotic_cd |
| PSMC5 | mitotic_cd |
| PHOX2B | mitotic_cd |
| DIS3 | mitotic_cd |
| DIS3L2 | mitotic_cd |
| ARHGAP42 | mitotic_cd |
| LUC7L3 | mitotic_cd |
| MAP2K6 | mitotic_cd |
| NIN | mitotic_cd |
| SAPCD2 | mitotic_cd |
| TICRR | mitotic_cd |
| UBE2E2 | mitotic_cd |
| TUBGCP3 | mitotic_cd |
| RDH11 | mitotic_cd |
| TNPO1 | mitotic_cd |
| UBE2J2 | mitotic_cd |
| GPR132 | mitotic_cd |
| MRPL19 | mitotic_cd |
| PPP1R12B | mitotic_cd |
| RANBP2 | mitotic_cd |
| PLCB1 | mitotic_cd |
| AFDN | mitotic_cd |
| CASP8AP2 | mitotic_cd |
| CEP131 | mitotic_cd |
| CHMP5 | mitotic_cd |
| CNIH4 | mitotic_cd |
| CSGALNACT1 | mitotic_cd |
| CSNK1A1 | mitotic_cd |
| DBF4B | mitotic_cd |
| DSCC1 | mitotic_cd |
| FAN1 | mitotic_cd |
| GINS3 | mitotic_cd |
| KATNB1 | mitotic_cd |
| MRPL36 | mitotic_cd |
| MYO16 | mitotic_cd |
| NME6 | mitotic_cd |
| ORC6 | mitotic_cd |
| PPP2R1B | mitotic_cd |
| SAC3D1 | mitotic_cd |
| CENPM | mitotic_cd |
| SMC5 | mitotic_cd |
| PID1 | mitotic_cd |
| PSMB10 | mitotic_cd |
| PSMB4 | mitotic_cd |
| SRSF10 | mitotic_cd |
| TENT4A | mitotic_cd |
| ZNF268 | mitotic_cd |
| SS18 | mitotic_cd |
| CCNF | mitotic_cd |
| KIF18B | mitotic_cd |
| ARPP19 | mitotic_cd |
| CNOT4 | mitotic_cd |
| CYTH2 | mitotic_cd |
| PPP2R2D | mitotic_cd |
| TAF9 | mitotic_cd |
| WDR76 | mitotic_cd |
| ZNF24 | mitotic_cd |
| RAB3A | mitotic_cd |
| DNAJC6 | mitotic_cd |
| CDC16 | mitotic_cd |
| CDC26 | mitotic_cd |
| CNOT1 | mitotic_cd |
| ACTR1A | mitotic_cd |
| B4GALT1 | mitotic_cd |
| BTBD3 | mitotic_cd |
| CDC123 | mitotic_cd |
| CDK11A | mitotic_cd |
| CENPW | mitotic_cd |
| CHMP4B | mitotic_cd |
| CKAP2L | mitotic_cd |
| CLIP1 | mitotic_cd |
| CYTH3 | mitotic_cd |
| DNAJC3 | mitotic_cd |
| DSN1 | mitotic_cd |
| ERN2 | mitotic_cd |
| FAM189B | mitotic_cd |
| FAM72B | mitotic_cd |
| HAUS3 | mitotic_cd |
| HECA | mitotic_cd |
| INTS3 | mitotic_cd |
| INTS8 | mitotic_cd |
| KIF4B | mitotic_cd |
| KLHL21 | mitotic_cd |
| LIN52 | mitotic_cd |
| LIX1L | mitotic_cd |
| MAD2L1BP | mitotic_cd |
| MAN1A2 | mitotic_cd |
| MARK4 | mitotic_cd |
| MATN2 | mitotic_cd |
| MOGAT2 | mitotic_cd |
| MRPS18B | mitotic_cd |
| NABP2 | mitotic_cd |
| NLRC4 | mitotic_cd |
| NUP155 | mitotic_cd |
| NUP88 | mitotic_cd |
| ORC1 | mitotic_cd |
| PCNAP1 | mitotic_cd |
| PPP1R9B | mitotic_cd |
| PSMA6 | mitotic_cd |
| PSMB2 | mitotic_cd |
| PSMG2 | mitotic_cd |
| RAE1 | mitotic_cd |
| SLBP | mitotic_cd |
| SNHG10 | mitotic_cd |
| SOGA1 | mitotic_cd |
| SSR3 | mitotic_cd |
| TMOD3 | mitotic_cd |
| TOB2 | mitotic_cd |
| TRAIP | mitotic_cd |
| TREX1 | mitotic_cd |
| TRIM35 | mitotic_cd |
| UACA | mitotic_cd |
| UBA3 | mitotic_cd |
| USP16 | mitotic_cd |
| VPS4A | mitotic_cd |
| WIPF2 | mitotic_cd |
| XPO4 | mitotic_cd |
| ZMYND19 | mitotic_cd |
| ENSA | mitotic_cd |
| RNASE7 | mitotic_cd |
| DEPDC7 | mitotic_cd |
| ANKRD17 | mitotic_cd |
| CENPN | mitotic_cd |
| PPP2R5A | mitotic_cd |
| CNTROB | mitotic_cd |
| RNF126 | mitotic_cd |
| SETMAR | mitotic_cd |
| DCTN1 | mitotic_cd |
| ZNF521 | mitotic_cd |
| RPA2 | mitotic_cd |
| CPNE8 | mitotic_cd |
| RINT1 | mitotic_cd |
| ZNF593 | mitotic_cd |
| DHX8 | mitotic_cd |
| TK2 | mitotic_cd |
| KANSL1 | mitotic_cd |
| WDR43 | mitotic_cd |
| AKAP8 | mitotic_cd |
| CSNK1D | mitotic_cd |
| NDE1 | mitotic_cd |
| PHF13 | mitotic_cd |
| DYNC1I2 | mitotic_cd |
| ZC3H12D | mitotic_cd |
| RRP1B | mitotic_cd |
| ANAPC7 | mitotic_cd |
| CEP78 | mitotic_cd |
| CCNB3 | mitotic_cd |
| ORC2 | mitotic_cd |
| PLK5 | mitotic_cd |
| DNAJA1 | mitotic_cd |
| SEPHS1 | mitotic_cd |
| ZSCAN5A | mitotic_cd |
| ANAPC4 | mitotic_cd |
| RPS27L | mitotic_cd |
| B9D2 | mitotic_cd |
| CADPS | mitotic_cd |
| CDC14A | mitotic_cd |
| CDH24 | mitotic_cd |
| CKAP2 | mitotic_cd |
| L3MBTL1 | mitotic_cd |
| NEK11 | mitotic_cd |
| NUP210 | mitotic_cd |
| PHIP | mitotic_cd |
| PRR5 | mitotic_cd |
| PSMA2 | mitotic_cd |
| PSMA8 | mitotic_cd |
| PSMC2 | mitotic_cd |
| SNRPB2 | mitotic_cd |
| SORL1 | mitotic_cd |
| SPIN3 | mitotic_cd |
| TAOK1 | mitotic_cd |
| TMEM140 | mitotic_cd |
| TRIOBP | mitotic_cd |
| TSKU | mitotic_cd |
| USP6NL | mitotic_cd |
| FBXL20 | mitotic_cd |
| STOX1 | mitotic_cd |
| ZNHIT2 | mitotic_cd |
| PSMA3 | mitotic_cd |
| PPP1R1C | mitotic_cd |
| PSMC1 | mitotic_cd |
| RMI2 | mitotic_cd |
| WAPL | mitotic_cd |
| NUP107 | mitotic_cd |
| TMCC1 | mitotic_cd |
| CEP63 | mitotic_cd |
| CRLF3 | mitotic_cd |
| ZRANB2 | mitotic_cd |
| ABCA7 | mitotic_cd |
| DYNLT3 | mitotic_cd |
| KATNA1 | mitotic_cd |
| ADM5 | mitotic_cd |
| PMF1 | mitotic_cd |
| RFC5 | mitotic_cd |
| ANKRD18A | mitotic_cd |
| CCP110 | mitotic_cd |
| CTDP1 | mitotic_cd |
| GOLT1A | mitotic_cd |
| HMG20B | mitotic_cd |
| MTURN | mitotic_cd |
| NUP205 | mitotic_cd |
| NUP58 | mitotic_cd |
| VCPIP1 | mitotic_cd |
| ZCCHC10 | mitotic_cd |
| ZW10 | mitotic_cd |
| PPP2CB | mitotic_cd |
| AOC2 | mitotic_cd |
| PARP3 | mitotic_cd |
| CETN2 | mitotic_cd |
| HTT | mitotic_cd |
| PSMD3 | mitotic_cd |
| RAD1 | mitotic_cd |
| GNB1 | mitotic_cd |
| ANK3 | mitotic_cd |
| ARGLU1 | mitotic_cd |
| BIRC8 | mitotic_cd |
| BOD1 | mitotic_cd |
| CUL9 | mitotic_cd |
| DMXL2 | mitotic_cd |
| DRD3 | mitotic_cd |
| EIF2A | mitotic_cd |
| KLHL22 | mitotic_cd |
| KMT5B | mitotic_cd |
| MTPN | mitotic_cd |
| NANOS1 | mitotic_cd |
| NSMCE2 | mitotic_cd |
| NUP214 | mitotic_cd |
| PRIM1 | mitotic_cd |
| PRIM2 | mitotic_cd |
| RHNO1 | mitotic_cd |
| SLC25A27 | mitotic_cd |
| TTYH1 | mitotic_cd |
| TUBG1 | mitotic_cd |
| USP37 | mitotic_cd |
| VPS4B | mitotic_cd |
| STAG3L1 | mitotic_cd |
| POLE2 | mitotic_cd |
| YWHAB | mitotic_cd |
| TNKS1BP1 | mitotic_cd |
| MORF4L2 | mitotic_cd |
| NSUN3 | mitotic_cd |
| REXO2 | mitotic_cd |
| LIN54 | mitotic_cd |
| DBF4 | mitotic_cd |
| SPDL1 | mitotic_cd |
| ANKRD10 | mitotic_cd |
| BIN3 | mitotic_cd |
| CDKN2AIP | mitotic_cd |
| DCTN2 | mitotic_cd |
| DYNC1LI1 | mitotic_cd |
| HINFP | mitotic_cd |
| LRIF1 | mitotic_cd |
| OSER1 | mitotic_cd |
| PHTF1 | mitotic_cd |
| PPP2R5B | mitotic_cd |
| PRR16 | mitotic_cd |
| RHOBTB3 | mitotic_cd |
| TUBA1A | mitotic_cd |
| USB1 | mitotic_cd |
| DYNLT1 | mitotic_cd |
| KCTD9 | mitotic_cd |
| PATJ | mitotic_cd |
| SVIP | mitotic_cd |
| TUBB4A | mitotic_cd |
| AP3D1 | mitotic_cd |
| CLTCL1 | mitotic_cd |
| POMZP3 | mitotic_cd |
| ANAPC2 | mitotic_cd |
| ANAPC5 | mitotic_cd |
| FBXO43 | mitotic_cd |
| UBE2E1 | mitotic_cd |
| CNOT10 | mitotic_cd |
| CNOT11 | mitotic_cd |
| CNOT6L | mitotic_cd |
| ZNF385A | mitotic_cd |
| IGHA1 | mitotic_cd |
| ABHD10 | mitotic_cd |
| ACTR8 | mitotic_cd |
| ACYP1 | mitotic_cd |
| ADCK2 | mitotic_cd |
| ADCY6 | mitotic_cd |
| ADGB | mitotic_cd |
| AGPAT3 | mitotic_cd |
| AHCTF1 | mitotic_cd |
| AKAP8L | mitotic_cd |
| ALMS1 | mitotic_cd |
| ANAPC13 | mitotic_cd |
| ANAPC15 | mitotic_cd |
| ANGEL2 | mitotic_cd |
| ANKRD36 | mitotic_cd |
| ANKRD40 | mitotic_cd |
| ARHGAP11B | mitotic_cd |
| ARHGAP19 | mitotic_cd |
| ARL4A | mitotic_cd |
| ARL8A | mitotic_cd |
| ARMC1 | mitotic_cd |
| ASPHD2 | mitotic_cd |
| ATL2 | mitotic_cd |
| ATXN1L | mitotic_cd |
| AURKAIP1 | mitotic_cd |
| BAIAP2 | mitotic_cd |
| BBS4 | mitotic_cd |
| BIVM | mitotic_cd |
| BOD1L2 | mitotic_cd |
| BORA | mitotic_cd |
| BRINP2 | mitotic_cd |
| BTNL9 | mitotic_cd |
| C2orf69 | mitotic_cd |
| C3orf62 | mitotic_cd |
| C4A | mitotic_cd |
| C5orf49 | mitotic_cd |
| CAMK2G | mitotic_cd |
| CAPN7 | mitotic_cd |
| CCDC107 | mitotic_cd |
| CCDC14 | mitotic_cd |
| CCDC150 | mitotic_cd |
| CCDC180 | mitotic_cd |
| CCDC90B | mitotic_cd |
| CCSAP | mitotic_cd |
| CDC42EP1 | mitotic_cd |
| CDK5RAP2 | mitotic_cd |
| CENPC | mitotic_cd |
| CENPL | mitotic_cd |
| CENPQ | mitotic_cd |
| CENPS | mitotic_cd |
| CENPT | mitotic_cd |
| CENPV | mitotic_cd |
| CEP152 | mitotic_cd |
| CEP164 | mitotic_cd |
| CEP192 | mitotic_cd |
| CEP290 | mitotic_cd |
| CEP350 | mitotic_cd |
| CEP41 | mitotic_cd |
| CEP57L1 | mitotic_cd |
| CEP76 | mitotic_cd |
| CEP85 | mitotic_cd |
| CHML | mitotic_cd |
| CHMP2A | mitotic_cd |
| CHMP4A | mitotic_cd |
| CHMP6 | mitotic_cd |
| CHMP7 | mitotic_cd |
| CLASP1 | mitotic_cd |
| CNEP1R1 | mitotic_cd |
| CNTRL | mitotic_cd |
| COQ9 | mitotic_cd |
| CPLANE1 | mitotic_cd |
| CRYBA1 | mitotic_cd |
| CTDNEP1 | mitotic_cd |
| CTDSP2 | mitotic_cd |
| DCAF16 | mitotic_cd |
| DCAF7 | mitotic_cd |
| DCUN1D3 | mitotic_cd |
| DDX12P | mitotic_cd |
| DET1 | mitotic_cd |
| DEXI | mitotic_cd |
| DHFR2 | mitotic_cd |
| DHFRP1 | mitotic_cd |
| DNAJB9 | mitotic_cd |
| DUSP12 | mitotic_cd |
| DYNC1LI2 | mitotic_cd |
| DZIP3 | mitotic_cd |
| E4F1 | mitotic_cd |
| EFHC1 | mitotic_cd |
| EML1 | mitotic_cd |
| EXTL2 | mitotic_cd |
| FAM110A | mitotic_cd |
| FBXL15 | mitotic_cd |
| FIGN | mitotic_cd |
| G2E3 | mitotic_cd |
| GABPAP | mitotic_cd |
| GAS2L1 | mitotic_cd |
| GAS2L3 | mitotic_cd |
| GBF1 | mitotic_cd |
| GOLGA6L5P | mitotic_cd |
| GOLGA8A | mitotic_cd |
| GOLGA8B | mitotic_cd |
| GOLT1B | mitotic_cd |
| GON7 | mitotic_cd |
| GRPEL1 | mitotic_cd |
| GTF3C4 | mitotic_cd |
| GTPBP8 | mitotic_cd |
| HAUS1 | mitotic_cd |
| HAUS2 | mitotic_cd |
| HAUS4 | mitotic_cd |
| HAUS5 | mitotic_cd |
| HAUS7 | mitotic_cd |
| HEPACAM2 | mitotic_cd |
| HERPUD2 | mitotic_cd |
| HINT3 | mitotic_cd |
| HP1BP3 | mitotic_cd |
| HPS4 | mitotic_cd |
| HS2ST1 | mitotic_cd |
| HUS1B | mitotic_cd |
| IDI2 | mitotic_cd |
| JADE2 | mitotic_cd |
| KAT14 | mitotic_cd |
| KATNBL1 | mitotic_cd |
| KBTBD2 | mitotic_cd |
| KCTD2 | mitotic_cd |
| KIAA0586 | mitotic_cd |
| KIAA1586 | mitotic_cd |
| KIF25 | mitotic_cd |
| KIFC2 | mitotic_cd |
| KLHDC9 | mitotic_cd |
| KLHL13 | mitotic_cd |
| KLHL42 | mitotic_cd |
| KLHL9 | mitotic_cd |
| LCMT1 | mitotic_cd |
| LENG8 | mitotic_cd |
| LIN37 | mitotic_cd |
| LNP1 | mitotic_cd |
| LRRC17 | mitotic_cd |
| LRRCC1 | mitotic_cd |
| LSM10 | mitotic_cd |
| LSM11 | mitotic_cd |
| LTN1 | mitotic_cd |
| LYAR | mitotic_cd |
| LYRM7 | mitotic_cd |
| MAP10 | mitotic_cd |
| MAPRE3 | mitotic_cd |
| MBOAT1 | mitotic_cd |
| MCMBP | mitotic_cd |
| MDM1 | mitotic_cd |
| MED31 | mitotic_cd |
| MEPCE | mitotic_cd |
| MGAT2 | mitotic_cd |
| MIS12 | mitotic_cd |
| MIS18A | mitotic_cd |
| MIS18BP1 | mitotic_cd |
| MITD1 | mitotic_cd |
| MLLT6 | mitotic_cd |
| MND1 | mitotic_cd |
| MRPS2 | mitotic_cd |
| MSL1 | mitotic_cd |
| MTCL1 | mitotic_cd |
| MZT1 | mitotic_cd |
| NACC2 | mitotic_cd |
| NDEL1 | mitotic_cd |
| NDUFAF6 | mitotic_cd |
| NEK9 | mitotic_cd |
| NLE1 | mitotic_cd |
| NPM2 | mitotic_cd |
| NSL1 | mitotic_cd |
| NSUN5P2 | mitotic_cd |
| NT5DC1 | mitotic_cd |
| NUDC | mitotic_cd |
| NUDT4 | mitotic_cd |
| NUFIP2 | mitotic_cd |
| NUP133 | mitotic_cd |
| NUP160 | mitotic_cd |
| NUP188 | mitotic_cd |
| NUP50 | mitotic_cd |
| NUP54 | mitotic_cd |
| NUP85 | mitotic_cd |
| OBSL1 | mitotic_cd |
| ODF2 | mitotic_cd |
| OFD1 | mitotic_cd |
| ORC3 | mitotic_cd |
| ORC4 | mitotic_cd |
| ORC5 | mitotic_cd |
| OSBPL6 | mitotic_cd |
| OSGIN2 | mitotic_cd |
| OTULIN | mitotic_cd |
| PAK1IP1 | mitotic_cd |
| PASK | mitotic_cd |
| PCDHGA5 | mitotic_cd |
| PCED1A | mitotic_cd |
| PCF11 | mitotic_cd |
| PCID2 | mitotic_cd |
| PET117 | mitotic_cd |
| PHOSPHO2 | mitotic_cd |
| PILRB | mitotic_cd |
| PKIA | mitotic_cd |
| PLCXD1 | mitotic_cd |
| POGLUT2 | mitotic_cd |
| POGZ | mitotic_cd |
| POLR1A | mitotic_cd |
| POLR1B | mitotic_cd |
| POM121C | mitotic_cd |
| PPP1CC | mitotic_cd |
| PPP2R3B | mitotic_cd |
| PPP2R5D | mitotic_cd |
| PPP6R3 | mitotic_cd |
| PRPF38A | mitotic_cd |
| PSMB11 | mitotic_cd |
| PSMB3 | mitotic_cd |
| PSMC4 | mitotic_cd |
| PSMD13 | mitotic_cd |
| PSMD5 | mitotic_cd |
| PSMD6 | mitotic_cd |
| PSME4 | mitotic_cd |
| PSMF1 | mitotic_cd |
| PSMG3 | mitotic_cd |
| PTAR1 | mitotic_cd |
| PYM1 | mitotic_cd |
| QRICH1 | mitotic_cd |
| RAD9B | mitotic_cd |
| RANBP1 | mitotic_cd |
| RASGEF1A | mitotic_cd |
| RBBP4P1 | mitotic_cd |
| REEP1 | mitotic_cd |
| REEP3 | mitotic_cd |
| REEP4 | mitotic_cd |
| RGS14 | mitotic_cd |
| RHEBP1 | mitotic_cd |
| RNASE6 | mitotic_cd |
| RNF141 | mitotic_cd |
| RNF32 | mitotic_cd |
| RPA4 | mitotic_cd |
| RPS27AP11 | mitotic_cd |
| RRP1 | mitotic_cd |
| RSRP1 | mitotic_cd |
| SAE1 | mitotic_cd |
| SAP30 | mitotic_cd |
| SAP30BP | mitotic_cd |
| SBDS | mitotic_cd |
| SEC13 | mitotic_cd |
| SEH1L | mitotic_cd |
| SFI1 | mitotic_cd |
| SGCD | mitotic_cd |
| SGO2 | mitotic_cd |
| SKA2P1 | mitotic_cd |
| SLC17A2 | mitotic_cd |
| SLC34A1 | mitotic_cd |
| SLF1 | mitotic_cd |
| SLF2 | mitotic_cd |
| SMC1B | mitotic_cd |
| SNUPN | mitotic_cd |
| SNX18 | mitotic_cd |
| SNX33 | mitotic_cd |
| SPAST | mitotic_cd |
| SPICE1 | mitotic_cd |
| SPIN4 | mitotic_cd |
| SRGAP2C | mitotic_cd |
| SSNA1 | mitotic_cd |
| SYNCRIP | mitotic_cd |
| SYNE4 | mitotic_cd |
| TAF2 | mitotic_cd |
| TCERG1 | mitotic_cd |
| TEDC1 | mitotic_cd |
| TENT4B | mitotic_cd |
| TMCO4 | mitotic_cd |
| TMEM138 | mitotic_cd |
| TMEM243 | mitotic_cd |
| TNPO2 | mitotic_cd |
| TOM1L2 | mitotic_cd |
| TPRA1 | mitotic_cd |
| TRIM73 | mitotic_cd |
| TRMT2A | mitotic_cd |
| TSPEAR-AS2 | mitotic_cd |
| TTC14 | mitotic_cd |
| TTC31 | mitotic_cd |
| TTC38 | mitotic_cd |
| TTLL7 | mitotic_cd |
| TUBBP2 | mitotic_cd |
| TUBD1 | mitotic_cd |
| TUBG2 | mitotic_cd |
| TUBGCP2 | mitotic_cd |
| TUBGCP4 | mitotic_cd |
| TUBGCP6 | mitotic_cd |
| TULP4 | mitotic_cd |
| TXNL4A | mitotic_cd |
| TYSND1 | mitotic_cd |
| UBL3 | mitotic_cd |
| USP53 | mitotic_cd |
| VPS25 | mitotic_cd |
| VPS37C | mitotic_cd |
| VPS72 | mitotic_cd |
| WDR81 | mitotic_cd |
| WDR90 | mitotic_cd |
| ZBED5 | mitotic_cd |
| ZC3HC1 | mitotic_cd |
| ZNF141 | mitotic_cd |
| ZNF207 | mitotic_cd |
| ZNF414 | mitotic_cd |
| ZNF587 | mitotic_cd |
| ZNF655 | mitotic_cd |
| ZNF830 | mitotic_cd |
| ZNF852 | mitotic_cd |
| ZNF98 | mitotic_cd |
| ZPBP | mitotic_cd |
| ACP5 | lysosomal_cd |
| ARSB | lysosomal_cd |
| ATP6V0C | lysosomal_cd |
| CD68 | lysosomal_cd |
| CLTA | lysosomal_cd |
| CTSB | lysosomal_cd |
| CTSC | lysosomal_cd |
| CTSF | lysosomal_cd |
| CTSK | lysosomal_cd |
| CTSL | lysosomal_cd |
| GALNS | lysosomal_cd |
| GLA | lysosomal_cd |
| GLB1 | lysosomal_cd |
| GUSB | lysosomal_cd |
| HGS | lysosomal_cd |
| IGF2R | lysosomal_cd |
| KIT | lysosomal_cd |
| LAMP3 | lysosomal_cd |
| LAT | lysosomal_cd |
| MAP6 | lysosomal_cd |
| MCOLN1 | lysosomal_cd |
| NAPSA | lysosomal_cd |
| NEU1 | lysosomal_cd |
| NPC1 | lysosomal_cd |
| NPC2 | lysosomal_cd |
| P2RX7 | lysosomal_cd |
| PCSK9 | lysosomal_cd |
| PIK3CD | lysosomal_cd |
| PIK3CG | lysosomal_cd |
| PLA2G15 | lysosomal_cd |
| SGSH | lysosomal_cd |
| SLC11A1 | lysosomal_cd |
| SLC11A2 | lysosomal_cd |
| SLURP1 | lysosomal_cd |
| SMPD1 | lysosomal_cd |
| VPS51 | lysosomal_cd |
| CDX2 | lysosomal_cd |
| CHGA | lysosomal_cd |
| HSPA8 | lysosomal_cd |
| SH3GL2 | lysosomal_cd |
| HDAC6 | lysosomal_cd |
| CORO1A | lysosomal_cd |
| VAMP8 | lysosomal_cd |
| ADRB2 | lysosomal_cd |
| RAB7A | lysosomal_cd |
| RASGRP1 | lysosomal_cd |
| ARRB1 | lysosomal_cd |
| AP1S3 | lysosomal_cd |
| ARF1 | lysosomal_cd |
| ARSA | lysosomal_cd |
| CTSD | lysosomal_cd |
| CTSS | lysosomal_cd |
| IDUA | lysosomal_cd |
| LAPTM4B | lysosomal_cd |
| NEDD4 | lysosomal_cd |
| PRICKLE1 | lysosomal_cd |
| ASAH1 | lysosomal_cd |
| CD63 | lysosomal_cd |
| FUCA1 | lysosomal_cd |
| SORT1 | lysosomal_cd |
| HOOK1 | lysosomal_cd |
| TSG101 | lysosomal_cd |
| UBE2Z | lysosomal_cd |
| USE1 | lysosomal_cd |
| NR4A3 | lysosomal_cd |
| CTSE | lysosomal_cd |
| AGA | lysosomal_cd |
| CLTB | lysosomal_cd |
| CTSZ | lysosomal_cd |
| LGMN | lysosomal_cd |
| NAGLU | lysosomal_cd |
| PSAP | lysosomal_cd |
| TXNDC5 | lysosomal_cd |
| CD81 | lysosomal_cd |
| GATA2 | lysosomal_cd |
| LYN | lysosomal_cd |
| RAB12 | lysosomal_cd |
| RAB14 | lysosomal_cd |
| RHOB | lysosomal_cd |
| SYT7 | lysosomal_cd |
| VPS52 | lysosomal_cd |
| S100A13 | lysosomal_cd |
| SLC17A5 | lysosomal_cd |
| AP1G1 | lysosomal_cd |
| CTSH | lysosomal_cd |
| HYAL1 | lysosomal_cd |
| LAMP1 | lysosomal_cd |
| VAMP7 | lysosomal_cd |
| SH3BP4 | lysosomal_cd |
| CD164 | lysosomal_cd |
| LIPA | lysosomal_cd |
| LAMP2 | lysosomal_cd |
| HOOK2 | lysosomal_cd |
| LAMTOR5 | lysosomal_cd |
| RNF128 | lysosomal_cd |
| AP4B1 | lysosomal_cd |
| ATP6V0D1 | lysosomal_cd |
| GALC | lysosomal_cd |
| TGFBRAP1 | lysosomal_cd |
| SRPX | lysosomal_cd |
| ABCA2 | lysosomal_cd |
| M6PR | lysosomal_cd |
| CLTC | lysosomal_cd |
| CTSG | lysosomal_cd |
| AP1M2 | lysosomal_cd |
| CLN3 | lysosomal_cd |
| ACD | lysosomal_cd |
| SPNS1 | lysosomal_cd |
| AP1S2 | lysosomal_cd |
| DNM2 | lysosomal_cd |
| PPT1 | lysosomal_cd |
| SCARB2 | lysosomal_cd |
| HOOK3 | lysosomal_cd |
| VPS53 | lysosomal_cd |
| LAT2 | lysosomal_cd |
| CCL14 | lysosomal_cd |
| RAB20 | lysosomal_cd |
| SLC7A8 | lysosomal_cd |
| ABCB9 | lysosomal_cd |
| DNASE2 | lysosomal_cd |
| LAMTOR1 | lysosomal_cd |
| TMEM106B | lysosomal_cd |
| CTSV | lysosomal_cd |
| ATG14 | lysosomal_cd |
| VPS33B | lysosomal_cd |
| TRAK1 | lysosomal_cd |
| ARSG | lysosomal_cd |
| VPS39 | lysosomal_cd |
| HEXB | lysosomal_cd |
| CHMP5 | lysosomal_cd |
| MTM1 | lysosomal_cd |
| PLA2G3 | lysosomal_cd |
| VPS41 | lysosomal_cd |
| AKTIP | lysosomal_cd |
| RAB39A | lysosomal_cd |
| SNAP23 | lysosomal_cd |
| SNAPIN | lysosomal_cd |
| DNAJC6 | lysosomal_cd |
| GBA | lysosomal_cd |
| GGA2 | lysosomal_cd |
| GGA3 | lysosomal_cd |
| TCIRG1 | lysosomal_cd |
| TPP1 | lysosomal_cd |
| EHD3 | lysosomal_cd |
| RAB34 | lysosomal_cd |
| VPS54 | lysosomal_cd |
| AP1M1 | lysosomal_cd |
| BECN2 | lysosomal_cd |
| CTSA | lysosomal_cd |
| SNX27 | lysosomal_cd |
| ATP6V0D2 | lysosomal_cd |
| ATP6AP1 | lysosomal_cd |
| IDS | lysosomal_cd |
| ATP6V0A4 | lysosomal_cd |
| GNPTAB | lysosomal_cd |
| AP3B1 | lysosomal_cd |
| ATP6V0A1 | lysosomal_cd |
| MANBA | lysosomal_cd |
| SORL1 | lysosomal_cd |
| VPS18 | lysosomal_cd |
| GM2A | lysosomal_cd |
| KIF13A | lysosomal_cd |
| MYO7A | lysosomal_cd |
| LAPTM5 | lysosomal_cd |
| VAMP2 | lysosomal_cd |
| ATP6V0A2 | lysosomal_cd |
| CTSO | lysosomal_cd |
| SUMF1 | lysosomal_cd |
| MGRN1 | lysosomal_cd |
| VPS11 | lysosomal_cd |
| VPS4B | lysosomal_cd |
| GAA | lysosomal_cd |
| GCC2 | lysosomal_cd |
| SCYL2 | lysosomal_cd |
| AP3B2 | lysosomal_cd |
| AP3M2 | lysosomal_cd |
| AP3S2 | lysosomal_cd |
| CLN5 | lysosomal_cd |
| CTNS | lysosomal_cd |
| NAGA | lysosomal_cd |
| GPRASP1 | lysosomal_cd |
| VPS33A | lysosomal_cd |
| ACP2 | lysosomal_cd |
| AP1B1 | lysosomal_cd |
| AP1S1 | lysosomal_cd |
| AP3D1 | lysosomal_cd |
| AP3M1 | lysosomal_cd |
| AP3S1 | lysosomal_cd |
| AP4E1 | lysosomal_cd |
| AP4M1 | lysosomal_cd |
| AP4S1 | lysosomal_cd |
| ATP6V0B | lysosomal_cd |
| ATP6V1H | lysosomal_cd |
| BLOC1S1 | lysosomal_cd |
| CLTCL1 | lysosomal_cd |
| CTSW | lysosomal_cd |
| DNASE2B | lysosomal_cd |
| ENTPD4 | lysosomal_cd |
| GGA1 | lysosomal_cd |
| GNPTG | lysosomal_cd |
| GNS | lysosomal_cd |
| HEXA | lysosomal_cd |
| HGSNAT | lysosomal_cd |
| LAPTM4A | lysosomal_cd |
| MAN2B1 | lysosomal_cd |
| MFSD8 | lysosomal_cd |
| NAGPA | lysosomal_cd |
| PPT2 | lysosomal_cd |
| CPLX2 | lysosomal_cd |
| ANKFY1 | lysosomal_cd |
| DENND3 | lysosomal_cd |
| HMGXB4 | lysosomal_cd |
| IFT46 | lysosomal_cd |
| LAMTOR4 | lysosomal_cd |
| LYST | lysosomal_cd |
| MILR1 | lysosomal_cd |
| MRGPRX2 | lysosomal_cd |
| MTCH1 | lysosomal_cd |
| NAT8 | lysosomal_cd |
| PCDHGA3 | lysosomal_cd |
| PSAPL1 | lysosomal_cd |
| RBSN | lysosomal_cd |
| RILP | lysosomal_cd |
| SCGB1D1 | lysosomal_cd |
| SNX16 | lysosomal_cd |
| SPTBN5 | lysosomal_cd |
| STX8 | lysosomal_cd |
| TMEM175 | lysosomal_cd |
| VIPAS39 | lysosomal_cd |
| VPS16 | lysosomal_cd |
| WASH3P | lysosomal_cd |
| ZFYVE16 | lysosomal_cd |
| ADGRE2 | lysosomal_cd |
| ARL8B | lysosomal_cd |
| ATP10B | lysosomal_cd |
| ATP13A2 | lysosomal_cd |
| BLK | lysosomal_cd |
| BLOC1S2 | lysosomal_cd |
| BORCS5 | lysosomal_cd |
| BORCS6 | lysosomal_cd |
| BTK | lysosomal_cd |
| C12orf4 | lysosomal_cd |
| CBL | lysosomal_cd |
| CD300A | lysosomal_cd |
| CD84 | lysosomal_cd |
| CLNK | lysosomal_cd |
| CLU | lysosomal_cd |
| DEF8 | lysosomal_cd |
| FAM98A | lysosomal_cd |
| FER | lysosomal_cd |
| FES | lysosomal_cd |
| FGR | lysosomal_cd |
| FLCN | lysosomal_cd |
| FOXF1 | lysosomal_cd |
| FTH1 | lysosomal_cd |
| FTL | lysosomal_cd |
| GAB2 | lysosomal_cd |
| HMOX1 | lysosomal_cd |
| HPS6 | lysosomal_cd |
| IL13 | lysosomal_cd |
| IL13RA2 | lysosomal_cd |
| IL4 | lysosomal_cd |
| IL4R | lysosomal_cd |
| KIF1B | lysosomal_cd |
| KXD1 | lysosomal_cd |
| LGALS9 | lysosomal_cd |
| LRRK2 | lysosomal_cd |
| MAP1LC3A | lysosomal_cd |
| MT3 | lysosomal_cd |
| MYH9 | lysosomal_cd |
| NCOA4 | lysosomal_cd |
| NDEL1 | lysosomal_cd |
| PDPK1 | lysosomal_cd |
| PIK3C3 | lysosomal_cd |
| PIP4K2A | lysosomal_cd |
| PIP4K2B | lysosomal_cd |
| PIP4P1 | lysosomal_cd |
| PLEKHM1 | lysosomal_cd |
| PLEKHM2 | lysosomal_cd |
| PTGDR | lysosomal_cd |
| PTGDS | lysosomal_cd |
| RAB3A | lysosomal_cd |
| RAC2 | lysosomal_cd |
| RUBCNL | lysosomal_cd |
| SNX4 | lysosomal_cd |
| SPAG9 | lysosomal_cd |
| SPHK2 | lysosomal_cd |
| SQSTM1 | lysosomal_cd |
| STXBP1 | lysosomal_cd |
| STXBP2 | lysosomal_cd |
| SYK | lysosomal_cd |
| SYTL4 | lysosomal_cd |
| TFEB | lysosomal_cd |
| UNC13D | lysosomal_cd |
| VPS4A | lysosomal_cd |
| ABCB1 | immunogenic |
| ABCC1 | immunogenic |
| ABHD6 | immunogenic |
| ACCS | immunogenic |
| ACE2 | immunogenic |
| ACP5 | immunogenic |
| ACSS2 | immunogenic |
| ADAM17 | immunogenic |
| ADGRL4 | immunogenic |
| ADIPOQ | immunogenic |
| ADM | immunogenic |
| ADSL | immunogenic |
| AHR | immunogenic |
| AHSG | immunogenic |
| AICDA | immunogenic |
| AKR1C1 | immunogenic |
| AKT1 | immunogenic |
| AKT1S1 | immunogenic |
| ANGPT2 | immunogenic |
| ANGPTL2 | immunogenic |
| ANGPTL4 | immunogenic |
| ANPEP | immunogenic |
| ANXA1 | immunogenic |
| ANXA13 | immunogenic |
| AOX1 | immunogenic |
| APP | immunogenic |
| ARIH1 | immunogenic |
| ARNTL | immunogenic |
| ARPP21 | immunogenic |
| ARSB | immunogenic |
| ASL | immunogenic |
| ASPRV1 | immunogenic |
| ASPSCR1 | immunogenic |
| ATP6AP2 | immunogenic |
| ATP6V0C | immunogenic |
| B3GALNT1 | immunogenic |
| BCAR3 | immunogenic |
| BCL10 | immunogenic |
| BCL2 | immunogenic |
| BCL6 | immunogenic |
| BCR | immunogenic |
| BCS1L | immunogenic |
| BID | immunogenic |
| BLNK | immunogenic |
| BMP2K | immunogenic |
| BMPER | immunogenic |
| BMPR2 | immunogenic |
| BTG3 | immunogenic |
| BTK | immunogenic |
| BZW1 | immunogenic |
| C1S | immunogenic |
| C3 | immunogenic |
| C5 | immunogenic |
| C5AR1 | immunogenic |
| C8G | immunogenic |
| CA1 | immunogenic |
| CADM1 | immunogenic |
| CALD1 | immunogenic |
| CAPG | immunogenic |
| CASP6 | immunogenic |
| CASP8 | immunogenic |
| CAST | immunogenic |
| CAT | immunogenic |
| CAV1 | immunogenic |
| CCK | immunogenic |
| CCL2 | immunogenic |
| CCL21 | immunogenic |
| CCL27 | immunogenic |
| CCL7 | immunogenic |
| CCN2 | immunogenic |
| CCRL2 | immunogenic |
| CD19 | immunogenic |
| CD2 | immunogenic |
| CD27 | immunogenic |
| CD274 | immunogenic |
| CD28 | immunogenic |
| CD2AP | immunogenic |
| CD38 | immunogenic |
| CD4 | immunogenic |
| CD40 | immunogenic |
| CD40LG | immunogenic |
| CD46 | immunogenic |
| CD47 | immunogenic |
| CD48 | immunogenic |
| CD69 | immunogenic |
| CD74 | immunogenic |
| CD8A | immunogenic |
| CDC42 | immunogenic |
| CDH1 | immunogenic |
| CDK4 | immunogenic |
| CDK9 | immunogenic |
| CEL | immunogenic |
| CFI | immunogenic |
| CGA | immunogenic |
| CHPT1 | immunogenic |
| CHUK | immunogenic |
| CISH | immunogenic |
| CMA1 | immunogenic |
| CMAS | immunogenic |
| CMIP | immunogenic |
| COL11A2 | immunogenic |
| COL4A2 | immunogenic |
| COL4A5 | immunogenic |
| CPB2 | immunogenic |
| CPE | immunogenic |
| CPOX | immunogenic |
| CPQ | immunogenic |
| CR2 | immunogenic |
| CREM | immunogenic |
| CRIP2 | immunogenic |
| CRISPLD2 | immunogenic |
| CRTAP | immunogenic |
| CRYGC | immunogenic |
| CSF2 | immunogenic |
| CSNK2A1 | immunogenic |
| CSNK2A2 | immunogenic |
| CTF1 | immunogenic |
| CTLA4 | immunogenic |
| CTSC | immunogenic |
| CTSF | immunogenic |
| CUX1 | immunogenic |
| CX3CL1 | immunogenic |
| CXCL10 | immunogenic |
| CXCR6 | immunogenic |
| CYGB | immunogenic |
| CYP11A1 | immunogenic |
| CYP1A2 | immunogenic |
| CYP4F3 | immunogenic |
| CYTIP | immunogenic |
| DBNL | immunogenic |
| DDC | immunogenic |
| DDIT3 | immunogenic |
| DDR1 | immunogenic |
| DDX19A | immunogenic |
| DDX41 | immunogenic |
| DES | immunogenic |
| DHODH | immunogenic |
| DMD | immunogenic |
| DMTN | immunogenic |
| DPEP1 | immunogenic |
| DUSP28 | immunogenic |
| DYNAP | immunogenic |
| DYRK3 | immunogenic |
| EAF2 | immunogenic |
| EBI3 | immunogenic |
| EDNRA | immunogenic |
| EEF1A2 | immunogenic |
| EHMT1 | immunogenic |
| ELANE | immunogenic |
| ELK3 | immunogenic |
| EMB | immunogenic |
| ENTPD1 | immunogenic |
| EPHA2 | immunogenic |
| EPHA3 | immunogenic |
| EPX | immunogenic |
| ERAP1 | immunogenic |
| ERCC2 | immunogenic |
| ERG | immunogenic |
| EVA1C | immunogenic |
| EZH2 | immunogenic |
| F3 | immunogenic |
| FABP1 | immunogenic |
| FAS | immunogenic |
| FASN | immunogenic |
| FBF1 | immunogenic |
| FCER2 | immunogenic |
| FCGR2B | immunogenic |
| FDXR | immunogenic |
| FGF1 | immunogenic |
| FKBP1A | immunogenic |
| FLT1 | immunogenic |
| FN1 | immunogenic |
| FNDC5 | immunogenic |
| FOS | immunogenic |
| FOSB | immunogenic |
| FOXP3 | immunogenic |
| FYCO1 | immunogenic |
| G6PD | immunogenic |
| GADD45B | immunogenic |
| GATA3 | immunogenic |
| GATM | immunogenic |
| GDF10 | immunogenic |
| GDF15 | immunogenic |
| GJB6 | immunogenic |
| GLA | immunogenic |
| GLYAT | immunogenic |
| GPR84 | immunogenic |
| GSDMD | immunogenic |
| GSK3B | immunogenic |
| GTF2F2 | immunogenic |
| GZMA | immunogenic |
| HAT1 | immunogenic |
| HDAC2 | immunogenic |
| HDGFL2 | immunogenic |
| HK1 | immunogenic |
| HLA-DPA1 | immunogenic |
| HLA-DRB1 | immunogenic |
| HLA-DRB3 | immunogenic |
| HMGA2 | immunogenic |
| HMGB1 | immunogenic |
| HMOX2 | immunogenic |
| HPD | immunogenic |
| HSPA14 | immunogenic |
| HSPB2 | immunogenic |
| HSPD1 | immunogenic |
| HTRA2 | immunogenic |
| HYLS1 | immunogenic |
| ICAM1 | immunogenic |
| IFI44L | immunogenic |
| IFITM1 | immunogenic |
| IFITM3 | immunogenic |
| IFNG | immunogenic |
| IGF1R | immunogenic |
| IGHE | immunogenic |
| IGHG3 | immunogenic |
| IGHV3-23 | immunogenic |
| IKBKG | immunogenic |
| IL10 | immunogenic |
| IL10RB | immunogenic |
| IL15 | immunogenic |
| IL17A | immunogenic |
| IL18 | immunogenic |
| IL18R1 | immunogenic |
| IL2 | immunogenic |
| IL2RA | immunogenic |
| IL31RA | immunogenic |
| IL3RA | immunogenic |
| IL4 | immunogenic |
| IL5 | immunogenic |
| IL5RA | immunogenic |
| IL6 | immunogenic |
| IMPA1 | immunogenic |
| IP6K2 | immunogenic |
| IRF7 | immunogenic |
| ISG20 | immunogenic |
| ITGA2B | immunogenic |
| ITGA5 | immunogenic |
| ITGAL | immunogenic |
| ITK | immunogenic |
| JAG1 | immunogenic |
| JAK2 | immunogenic |
| JUN | immunogenic |
| KCNA3 | immunogenic |
| KCNE1 | immunogenic |
| KCNJ2 | immunogenic |
| KCNMA1 | immunogenic |
| KDM1A | immunogenic |
| KIT | immunogenic |
| KLKB1 | immunogenic |
| KLRC2 | immunogenic |
| KRAS | immunogenic |
| KRT12 | immunogenic |
| KRT20 | immunogenic |
| KRT23 | immunogenic |
| LAT | immunogenic |
| LCN2 | immunogenic |
| LDLR | immunogenic |
| LGALS3 | immunogenic |
| LIX1 | immunogenic |
| LRP1 | immunogenic |
| LRP2 | immunogenic |
| LXN | immunogenic |
| LYVE1 | immunogenic |
| MAG | immunogenic |
| MALT1 | immunogenic |
| MAOA | immunogenic |
| MAP1A | immunogenic |
| MAP2K7 | immunogenic |
| MAPK1 | immunogenic |
| MAPK14 | immunogenic |
| MAPK3 | immunogenic |
| MARK3 | immunogenic |
| MASP2 | immunogenic |
| MBL2 | immunogenic |
| MC4R | immunogenic |
| MCF2L | immunogenic |
| MCL1 | immunogenic |
| MED1 | immunogenic |
| MFGE8 | immunogenic |
| MGP | immunogenic |
| MIA | immunogenic |
| MIB1 | immunogenic |
| MMP19 | immunogenic |
| MMP3 | immunogenic |
| MNAT1 | immunogenic |
| MOK | immunogenic |
| MPV17 | immunogenic |
| MRAP | immunogenic |
| MSX2 | immunogenic |
| MTOR | immunogenic |
| MUC16 | immunogenic |
| MVP | immunogenic |
| MYD88 | immunogenic |
| NAAA | immunogenic |
| NBN | immunogenic |
| NDP | immunogenic |
| NDUFAF3 | immunogenic |
| NECTIN1 | immunogenic |
| NELFE | immunogenic |
| NFKB1 | immunogenic |
| NFKB2 | immunogenic |
| NFKBIA | immunogenic |
| NGF | immunogenic |
| NOCT | immunogenic |
| NPC1 | immunogenic |
| NPM1 | immunogenic |
| NR1I2 | immunogenic |
| NR2E3 | immunogenic |
| NR3C1 | immunogenic |
| NR4A1 | immunogenic |
| OCA2 | immunogenic |
| P2RY12 | immunogenic |
| P4HB | immunogenic |
| PAGR1 | immunogenic |
| PAK1 | immunogenic |
| PAOX | immunogenic |
| PCSK1N | immunogenic |
| PCTP | immunogenic |
| PDCD1 | immunogenic |
| PDF | immunogenic |
| PDXK | immunogenic |
| PECAM1 | immunogenic |
| PFKFB3 | immunogenic |
| PGF | immunogenic |
| PIAS2 | immunogenic |
| PIGF | immunogenic |
| PIK3CA | immunogenic |
| PIK3CB | immunogenic |
| PIK3CD | immunogenic |
| PIK3CG | immunogenic |
| PIKFYVE | immunogenic |
| PITX1 | immunogenic |
| PLA2G2D | immunogenic |
| PLA2G4A | immunogenic |
| PLAC8 | immunogenic |
| PLAT | immunogenic |
| PLAUR | immunogenic |
| PLK3 | immunogenic |
| PLXNA2 | immunogenic |
| PMAIP1 | immunogenic |
| PNP | immunogenic |
| PRKCB | immunogenic |
| PRL | immunogenic |
| PRSS1 | immunogenic |
| PRTN3 | immunogenic |
| PSEN1 | immunogenic |
| PSMB7 | immunogenic |
| PSMG1 | immunogenic |
| PSPH | immunogenic |
| PTCRA | immunogenic |
| PTEN | immunogenic |
| PTGS1 | immunogenic |
| PTGS2 | immunogenic |
| PTN | immunogenic |
| PTPMT1 | immunogenic |
| PTPN11 | immunogenic |
| PTPN6 | immunogenic |
| PTPRC | immunogenic |
| QKI | immunogenic |
| RAB18 | immunogenic |
| RAF1 | immunogenic |
| RAG2 | immunogenic |
| RARA | immunogenic |
| RBMS3 | immunogenic |
| RELA | immunogenic |
| RELB | immunogenic |
| REM1 | immunogenic |
| RHOH | immunogenic |
| RIOX1 | immunogenic |
| RNASE1 | immunogenic |
| ROBO3 | immunogenic |
| RORC | immunogenic |
| RPS20 | immunogenic |
| RRAD | immunogenic |
| RTN2 | immunogenic |
| S100A4 | immunogenic |
| S100A6 | immunogenic |
| SAT1 | immunogenic |
| SCN11A | immunogenic |
| SCPEP1 | immunogenic |
| SDC2 | immunogenic |
| SELENOP | immunogenic |
| SELP | immunogenic |
| SERPINA1 | immunogenic |
| SERPINE1 | immunogenic |
| SERPING1 | immunogenic |
| SERPINH1 | immunogenic |
| SFTPC | immunogenic |
| SGCE | immunogenic |
| SHC1 | immunogenic |
| SLA2 | immunogenic |
| SLC11A1 | immunogenic |
| SLC25A20 | immunogenic |
| SLC7A9 | immunogenic |
| SLURP1 | immunogenic |
| SMPD1 | immunogenic |
| SNCA | immunogenic |
| SOCS3 | immunogenic |
| SOS1 | immunogenic |
| SPAG5 | immunogenic |
| SPP1 | immunogenic |
| SREBF2 | immunogenic |
| SRRM2 | immunogenic |
| SRY | immunogenic |
| ST3GAL4 | immunogenic |
| STOML2 | immunogenic |
| STT3A | immunogenic |
| SULT1E1 | immunogenic |
| SYK | immunogenic |
| TAPBP | immunogenic |
| TFDP2 | immunogenic |
| TFRC | immunogenic |
| TGFB1 | immunogenic |
| THBD | immunogenic |
| TLE1 | immunogenic |
| TLR4 | immunogenic |
| TLR5 | immunogenic |
| TLR8 | immunogenic |
| TNF | immunogenic |
| TNFSF13B | immunogenic |
| TNNT1 | immunogenic |
| TPI1 | immunogenic |
| TRIB3 | immunogenic |
| TRIM21 | immunogenic |
| TRPV4 | immunogenic |
| TSPAN33 | immunogenic |
| TSPO | immunogenic |
| UBE3A | immunogenic |
| USF2 | immunogenic |
| VCAM1 | immunogenic |
| VPS51 | immunogenic |
| WNT11 | immunogenic |
| WNT5A | immunogenic |
| XCL1 | immunogenic |
| XPO1 | immunogenic |
| SPRY2 | immunogenic |
| GDF3 | immunogenic |
| INTS13 | immunogenic |
| RUNX3 | immunogenic |
| SLC22A3 | immunogenic |
| SOX17 | immunogenic |
| TNFSF8 | immunogenic |
| UVRAG | immunogenic |
| LPAR3 | immunogenic |
| CHGA | immunogenic |
| SST | immunogenic |
| SSTR2 | immunogenic |
| ATRX | immunogenic |
| HSF1 | immunogenic |
| MEG3 | immunogenic |
| PDCD1LG2 | immunogenic |
| PPY | immunogenic |
| STK11 | immunogenic |
| TMED7 | immunogenic |
| MCM2 | immunogenic |
| RASSF1 | immunogenic |
| RNASE3 | immunogenic |
| LRIG1 | immunogenic |
| MCM7 | immunogenic |
| NOTCH4 | immunogenic |
| TGFA | immunogenic |
| RNH1 | immunogenic |
| KLK5 | immunogenic |
| TPM1 | immunogenic |
| UBB | immunogenic |
| ARID1A | immunogenic |
| GSTT1 | immunogenic |
| HRAS | immunogenic |
| PIK3R1 | immunogenic |
| INHBA | immunogenic |
| CLDN3 | immunogenic |
| FOXA2 | immunogenic |
| PTK2 | immunogenic |
| SPA17 | immunogenic |
| APOBEC3B | immunogenic |
| CCNE1 | immunogenic |
| CREBBP | immunogenic |
| CYP1B1 | immunogenic |
| DAPK1 | immunogenic |
| HDAC1 | immunogenic |
| IMP3 | immunogenic |
| KDM6A | immunogenic |
| NCOA3 | immunogenic |
| NOTCH1 | immunogenic |
| STAG2 | immunogenic |
| CTHRC1 | immunogenic |
| DAB2 | immunogenic |
| ELAVL3 | immunogenic |
| FGF19 | immunogenic |
| GSTM2 | immunogenic |
| ISYNA1 | immunogenic |
| PAG1 | immunogenic |
| TNC | immunogenic |
| SH3GL2 | immunogenic |
| CHEK2 | immunogenic |
| ARHGEF7 | immunogenic |
| ATG7 | immunogenic |
| BRINP1 | immunogenic |
| CCAR2 | immunogenic |
| CCN4 | immunogenic |
| CD44 | immunogenic |
| CSTF2 | immunogenic |
| DLL1 | immunogenic |
| DUSP1 | immunogenic |
| EMP2 | immunogenic |
| ERCC1 | immunogenic |
| FGF7 | immunogenic |
| FOXA1 | immunogenic |
| GDE1 | immunogenic |
| GEM | immunogenic |
| GRIK2 | immunogenic |
| GSTO2 | immunogenic |
| HDAC9 | immunogenic |
| HLA-DMA | immunogenic |
| HNF1A-AS1 | immunogenic |
| HSPA1A | immunogenic |
| HSPA1B | immunogenic |
| KAT2A | immunogenic |
| KAT2B | immunogenic |
| MALAT1 | immunogenic |
| MLH1 | immunogenic |
| MSH2 | immunogenic |
| MYOG | immunogenic |
| NEAT1 | immunogenic |
| NFATC1 | immunogenic |
| NID2 | immunogenic |
| NOTCH3 | immunogenic |
| PIAS1 | immunogenic |
| PINX1 | immunogenic |
| RORA | immunogenic |
| SGSM3 | immunogenic |
| SULT1A1 | immunogenic |
| SYP | immunogenic |
| TARBP2 | immunogenic |
| TGFBI | immunogenic |
| TLR6 | immunogenic |
| TMSB4X | immunogenic |
| TNFRSF12A | immunogenic |
| TOMM34 | immunogenic |
| TSC2 | immunogenic |
| WWOX | immunogenic |
| XRCC1 | immunogenic |
| ATIC | immunogenic |
| MSH6 | immunogenic |
| AMACR | immunogenic |
| GALNT14 | immunogenic |
| MAP3K1 | immunogenic |
| NQO1 | immunogenic |
| SCGB3A1 | immunogenic |
| ACTB | immunogenic |
| EPHX1 | immunogenic |
| MAP1LC3B | immunogenic |
| SPARC | immunogenic |
| TGFBR2 | immunogenic |
| NRAS | immunogenic |
| FOSL1 | immunogenic |
| G0S2 | immunogenic |
| PRLR | immunogenic |
| PTCH1 | immunogenic |
| UCP2 | immunogenic |
| ACTG1 | immunogenic |
| AKR1B10 | immunogenic |
| CCDC6 | immunogenic |
| CCNH | immunogenic |
| COL5A1 | immunogenic |
| DUSP6 | immunogenic |
| EMSY | immunogenic |
| GAPDH | immunogenic |
| GSS | immunogenic |
| KRT71 | immunogenic |
| NSMF | immunogenic |
| PSMA4 | immunogenic |
| RBP4 | immunogenic |
| RCN1 | immunogenic |
| RHOA | immunogenic |
| SERPINB5 | immunogenic |
| SLC12A2 | immunogenic |
| SLC12A9 | immunogenic |
| SNRPD3 | immunogenic |
| TFF1 | immunogenic |
| VTN | immunogenic |
| XDH | immunogenic |
| MAP3K7 | immunogenic |
| AIMP1 | immunogenic |
| ANTXR1 | immunogenic |
| ARC | immunogenic |
| ATF3 | immunogenic |
| CD248 | immunogenic |
| CRISP2 | immunogenic |
| DFFB | immunogenic |
| VAV3 | immunogenic |
| ALPL | immunogenic |
| C6 | immunogenic |
| COL1A1 | immunogenic |
| SLC20A2 | immunogenic |
| TIMP2 | immunogenic |
| ETV5 | immunogenic |
| MRE11 | immunogenic |
| CHM | immunogenic |
| PSMD12 | immunogenic |
| PIK3R3 | immunogenic |
| AKIRIN2 | immunogenic |
| VSIR | immunogenic |
| CCNE2 | immunogenic |
| CDK1 | immunogenic |
| CENPU | immunogenic |
| E2F1 | immunogenic |
| FBXO5 | immunogenic |
| GMNN | immunogenic |
| KIF15 | immunogenic |
| MAPK13 | immunogenic |
| PTTG1 | immunogenic |
| ADRB2 | immunogenic |
| BCL2A1 | immunogenic |
| BHLHE40 | immunogenic |
| BRCC3 | immunogenic |
| CCND2 | immunogenic |
| DKK1 | immunogenic |
| EP300 | immunogenic |
| ETS1 | immunogenic |
| FANCA | immunogenic |
| GCLM | immunogenic |
| HBEGF | immunogenic |
| HES1 | immunogenic |
| HYAL2 | immunogenic |
| ITGB4 | immunogenic |
| JAG2 | immunogenic |
| KIN | immunogenic |
| PDCD4 | immunogenic |
| PKD1 | immunogenic |
| POR | immunogenic |
| RAB27A | immunogenic |
| RFC3 | immunogenic |
| RPA1 | immunogenic |
| TARDBP | immunogenic |
| TNFRSF11B | immunogenic |
| ZEB2 | immunogenic |
| LTB4R2 | immunogenic |
| MAP2K1 | immunogenic |
| NTSR1 | immunogenic |
| PRKCA | immunogenic |
| RASGRP1 | immunogenic |
| ADORA2B | immunogenic |
| AKT3 | immunogenic |
| ARRB1 | immunogenic |
| BAG3 | immunogenic |
| CEBPB | immunogenic |
| CEMIP | immunogenic |
| DHRS3 | immunogenic |
| ENPP1 | immunogenic |
| ERO1A | immunogenic |
| FOXC1 | immunogenic |
| GREM1 | immunogenic |
| ITGA9 | immunogenic |
| LIMK1 | immunogenic |
| LIPG | immunogenic |
| NUP62 | immunogenic |
| PRRX2 | immunogenic |
| SMARCD3 | immunogenic |
| TEAD1 | immunogenic |
| TLR1 | immunogenic |
| WIF1 | immunogenic |
| WNT3 | immunogenic |
| C1QBP | immunogenic |
| DIABLO | immunogenic |
| LAPTM4B | immunogenic |
| BCL3 | immunogenic |
| BTG2 | immunogenic |
| SLPI | immunogenic |
| ABCG1 | immunogenic |
| ACSL4 | immunogenic |
| ACVR1 | immunogenic |
| AHNAK | immunogenic |
| AKT2 | immunogenic |
| ANKRD1 | immunogenic |
| ANXA3 | immunogenic |
| ANXA6 | immunogenic |
| BMI1 | immunogenic |
| BTN3A2 | immunogenic |
| C1D | immunogenic |
| CAPN1 | immunogenic |
| CENPK | immunogenic |
| CHMP3 | immunogenic |
| CLU | immunogenic |
| CPA4 | immunogenic |
| CRABP1 | immunogenic |
| CRMP1 | immunogenic |
| CXADR | immunogenic |
| CXCL13 | immunogenic |
| DHX40 | immunogenic |
| DKK2 | immunogenic |
| DLL4 | immunogenic |
| DNM1L | immunogenic |
| DVL1 | immunogenic |
| DYRK2 | immunogenic |
| E2F6 | immunogenic |
| ECT2 | immunogenic |
| ELOVL1 | immunogenic |
| ELOVL5 | immunogenic |
| EPHA1 | immunogenic |
| EREG | immunogenic |
| FABP5 | immunogenic |
| GGCX | immunogenic |
| GHR | immunogenic |
| GRAP2 | immunogenic |
| H2AX | immunogenic |
| HIC1 | immunogenic |
| HOXD13 | immunogenic |
| IGF2BP3 | immunogenic |
| IGKV1-5 | immunogenic |
| IKBKE | immunogenic |
| IMMP2L | immunogenic |
| INF2 | immunogenic |
| IRAK1 | immunogenic |
| KCNH8 | immunogenic |
| LAMA4 | immunogenic |
| LATS1 | immunogenic |
| LGALS8 | immunogenic |
| LGR5 | immunogenic |
| LOXL2 | immunogenic |
| LPIN1 | immunogenic |
| MAFK | immunogenic |
| MAPK9 | immunogenic |
| MAT2B | immunogenic |
| MECOM | immunogenic |
| MMAB | immunogenic |
| MMP14 | immunogenic |
| MTTP | immunogenic |
| NCAPD2 | immunogenic |
| NEDD4 | immunogenic |
| NOL3 | immunogenic |
| NOTCH2 | immunogenic |
| NTF3 | immunogenic |
| OC90 | immunogenic |
| P4HA1 | immunogenic |
| PAK4 | immunogenic |
| PARVA | immunogenic |
| PAX5 | immunogenic |
| PDGFRA | immunogenic |
| PDPN | immunogenic |
| PEX14 | immunogenic |
| PHGDH | immunogenic |
| PIWIL1 | immunogenic |
| PLIN4 | immunogenic |
| PLXNA1 | immunogenic |
| PRKAR1A | immunogenic |
| PSAT1 | immunogenic |
| PSMD14 | immunogenic |
| PTK7 | immunogenic |
| PTPN12 | immunogenic |
| PTPN22 | immunogenic |
| PTPRZ1 | immunogenic |
| RAB25 | immunogenic |
| RAC1 | immunogenic |
| RAD51 | immunogenic |
| RASA4 | immunogenic |
| RBM3 | immunogenic |
| REST | immunogenic |
| RNF8 | immunogenic |
| SARNP | immunogenic |
| SEMA3A | immunogenic |
| SERPINB2 | immunogenic |
| SFRP1 | immunogenic |
| SIN3B | immunogenic |
| SLC22A23 | immunogenic |
| SLC25A16 | immunogenic |
| SLC4A7 | immunogenic |
| SLN | immunogenic |
| SMAD7 | immunogenic |
| SMURF2 | immunogenic |
| SPOP | immunogenic |
| SQSTM1 | immunogenic |
| SSBP1 | immunogenic |
| ST3GAL6 | immunogenic |
| ST6GAL1 | immunogenic |
| TBK1 | immunogenic |
| TEX9 | immunogenic |
| TFCP2L1 | immunogenic |
| TFPI2 | immunogenic |
| TGFBR3 | immunogenic |
| THBS2 | immunogenic |
| THY1 | immunogenic |
| TINAGL1 | immunogenic |
| TIPIN | immunogenic |
| TLN1 | immunogenic |
| TMEM88 | immunogenic |
| TNFRSF10B | immunogenic |
| TNFSF12 | immunogenic |
| TRIM13 | immunogenic |
| TRIM59 | immunogenic |
| TRIP10 | immunogenic |
| TUFT1 | immunogenic |
| TXNIP | immunogenic |
| UBAP2 | immunogenic |
| UBE2B | immunogenic |
| UCHL3 | immunogenic |
| UIMC1 | immunogenic |
| ULK1 | immunogenic |
| UTRN | immunogenic |
| VDAC1 | immunogenic |
| WARS2 | immunogenic |
| WWTR1 | immunogenic |
| ZNF326 | immunogenic |
| MCM5 | immunogenic |
| CYP4B1 | immunogenic |
| MMP13 | immunogenic |
| APAF1 | immunogenic |
| AAGAB | immunogenic |
| CD99 | immunogenic |
| COMMD10 | immunogenic |
| FOXQ1 | immunogenic |
| HTATIP2 | immunogenic |
| NNMT | immunogenic |
| PPM1D | immunogenic |
| PSEN2 | immunogenic |
| RBX1 | immunogenic |
| RIN1 | immunogenic |
| TRPM2 | immunogenic |
| IER3 | immunogenic |
| MYBPH | immunogenic |
| FRMD4A | immunogenic |
| MFAP5 | immunogenic |
| MTA3 | immunogenic |
| NANS | immunogenic |
| RBPJ | immunogenic |
| SLC44A1 | immunogenic |
| LOXL1 | immunogenic |
| LOX | immunogenic |
| NDRG1 | immunogenic |
| TPR | immunogenic |
| GRK2 | immunogenic |
| PRKCD | immunogenic |
| PRKCQ | immunogenic |
| CNTN1 | immunogenic |
| DKK3 | immunogenic |
| HIPK2 | immunogenic |
| HOPX | immunogenic |
| IFT88 | immunogenic |
| MAP3K8 | immunogenic |
| MIEF1 | immunogenic |
| PDZK1IP1 | immunogenic |
| PRDM2 | immunogenic |
| RASIP1 | immunogenic |
| SDF4 | immunogenic |
| SOX11 | immunogenic |
| ASAH1 | immunogenic |
| FUCA1 | immunogenic |
| BUB3 | immunogenic |
| AGK | immunogenic |
| ARAF | immunogenic |
| ARG2 | immunogenic |
| ATG9B | immunogenic |
| BMP1 | immunogenic |
| BTG1 | immunogenic |
| C14orf93 | immunogenic |
| CARD11 | immunogenic |
| CCDC80 | immunogenic |
| CD3D | immunogenic |
| CITED1 | immunogenic |
| CITED2 | immunogenic |
| CTDSPL | immunogenic |
| EIF1AX | immunogenic |
| ERCC5 | immunogenic |
| EXOSC6 | immunogenic |
| FAM107B | immunogenic |
| FYN | immunogenic |
| GADD45G | immunogenic |
| GAP43 | immunogenic |
| GATAD2A | immunogenic |
| GGCT | immunogenic |
| GJB3 | immunogenic |
| GPX3 | immunogenic |
| GRB14 | immunogenic |
| HEMGN | immunogenic |
| HOOK1 | immunogenic |
| IL13RA2 | immunogenic |
| LAMB3 | immunogenic |
| LIG4 | immunogenic |
| LTBP2 | immunogenic |
| MICA | immunogenic |
| MVD | immunogenic |
| NFIL3 | immunogenic |
| NOVA1 | immunogenic |
| NRARP | immunogenic |
| PA2G4 | immunogenic |
| PDPK1 | immunogenic |
| PTPN2 | immunogenic |
| RAC2 | immunogenic |
| RASSF5 | immunogenic |
| SDC4 | immunogenic |
| SEC62 | immunogenic |
| SHC3 | immunogenic |
| SLC16A2 | immunogenic |
| SLIT2 | immunogenic |
| SLIT3 | immunogenic |
| SMURF1 | immunogenic |
| SNX5 | immunogenic |
| STK4 | immunogenic |
| TAF1 | immunogenic |
| TBX15 | immunogenic |
| TEK | immunogenic |
| TIAM1 | immunogenic |
| TIMM44 | immunogenic |
| TIMP4 | immunogenic |
| TOMM20 | immunogenic |
| TSG101 | immunogenic |
| TSPAN13 | immunogenic |
| UBE2Z | immunogenic |
| USE1 | immunogenic |
| VASN | immunogenic |
| VEGFC | immunogenic |
| YES1 | immunogenic |
| ZCCHC12 | immunogenic |
| SPINT1 | immunogenic |
| EVPL | immunogenic |
| GTF2IRD1 | immunogenic |
| MAML2 | immunogenic |
| CFLAR | immunogenic |
| SALL3 | immunogenic |
| CAP1 | immunogenic |
| HACD1 | immunogenic |
| SORBS1 | immunogenic |
| PAK3 | immunogenic |
| UCK2 | immunogenic |
| TRAF2 | immunogenic |
| GPR160 | immunogenic |
| KRIT1 | immunogenic |
| MYOZ2 | immunogenic |
| AGO2 | immunogenic |
| ALOX5 | immunogenic |
| APOBEC1 | immunogenic |
| CALM2 | immunogenic |
| CALM3 | immunogenic |
| CAMKMT | immunogenic |
| CDA | immunogenic |
| JUP | immunogenic |
| MSH5 | immunogenic |
| PSMD10 | immunogenic |
| RAP2B | immunogenic |
| RLN1 | immunogenic |
| STK10 | immunogenic |
| TEX14 | immunogenic |
| ZFP64 | immunogenic |
| ZFPM1 | immunogenic |
| SPTLC2 | immunogenic |
| CTSE | immunogenic |
| PBX2 | immunogenic |
| WNT10A | immunogenic |
| CDKN2D | immunogenic |
| CLEC10A | immunogenic |
| EBNA1BP2 | immunogenic |
| REXO1 | immunogenic |
| RPSA | immunogenic |
| ASCL1 | immunogenic |
| DNAJC15 | immunogenic |
| DLGAP5 | immunogenic |
| GINS4 | immunogenic |
| OIP5 | immunogenic |
| SLC38A1 | immunogenic |
| APBA2 | immunogenic |
| CD55 | immunogenic |
| EBAG9 | immunogenic |
| FADS1 | immunogenic |
| HSPH1 | immunogenic |
| IL11 | immunogenic |
| KDM4B | immunogenic |
| KLF12 | immunogenic |
| KLF9 | immunogenic |
| KRT8 | immunogenic |
| NASP | immunogenic |
| POU2F1 | immunogenic |
| RHBDF1 | immunogenic |
| TOB1 | immunogenic |
| TRIM16 | immunogenic |
| NFKBIB | immunogenic |
| ITPR3 | immunogenic |
| RGS18 | immunogenic |
| ANGPTL6 | immunogenic |
| APPL1 | immunogenic |
| ASIC2 | immunogenic |
| CA8 | immunogenic |
| CD247 | immunogenic |
| CLDN11 | immunogenic |
| CLIC4 | immunogenic |
| DOCK6 | immunogenic |
| EGFL8 | immunogenic |
| EGR2 | immunogenic |
| FEZF1 | immunogenic |
| FLNC | immunogenic |
| FRAT1 | immunogenic |
| GIPC2 | immunogenic |
| GLDC | immunogenic |
| GPR155 | immunogenic |
| HAS1 | immunogenic |
| HMBOX1 | immunogenic |
| HOXD3 | immunogenic |
| HSD11B2 | immunogenic |
| HSD17B7 | immunogenic |
| ICAM2 | immunogenic |
| ITGB6 | immunogenic |
| KMT2C | immunogenic |
| LMAN2 | immunogenic |
| MAPRE1 | immunogenic |
| MED15 | immunogenic |
| MLKL | immunogenic |
| MYO5B | immunogenic |
| MZB1 | immunogenic |
| NEDD1 | immunogenic |
| NOC3L | immunogenic |
| NTRK2 | immunogenic |
| PAX3 | immunogenic |
| PLXND1 | immunogenic |
| PRDM16 | immunogenic |
| PRKCI | immunogenic |
| RAB31 | immunogenic |
| RASSF8 | immunogenic |
| RNF180 | immunogenic |
| RNF6 | immunogenic |
| SEMA5A | immunogenic |
| SOCS4 | immunogenic |
| TCAP | immunogenic |
| TRAF5 | immunogenic |
| TSPAN9 | immunogenic |
| VSX1 | immunogenic |
| WNT6 | immunogenic |
| ZBTB20 | immunogenic |
| COL4A1 | immunogenic |
| RPRM | immunogenic |
| AGA | immunogenic |
| CLTB | immunogenic |
| IKBKB | immunogenic |
| TRAF6 | immunogenic |
| MYO6 | immunogenic |
| IL4R | immunogenic |
| ADAM23 | immunogenic |
| ADAMTS8 | immunogenic |
| ADAMTS9 | immunogenic |
| ADH5 | immunogenic |
| AEBP1 | immunogenic |
| AHRR | immunogenic |
| AKIP1 | immunogenic |
| ANO1 | immunogenic |
| ANP32B | immunogenic |
| AREG | immunogenic |
| ASPN | immunogenic |
| AZIN1 | immunogenic |
| BANF1 | immunogenic |
| BCL9 | immunogenic |
| C4BPA | immunogenic |
| CAB39 | immunogenic |
| CACUL1 | immunogenic |
| CBS | immunogenic |
| CCDC125 | immunogenic |
| CCDC134 | immunogenic |
| CCN3 | immunogenic |
| CD81 | immunogenic |
| CD8B | immunogenic |
| CHAF1A | immunogenic |
| CLDN2 | immunogenic |
| CMTM3 | immunogenic |
| CMTM6 | immunogenic |
| COASY | immunogenic |
| COL10A1 | immunogenic |
| COL11A1 | immunogenic |
| COL12A1 | immunogenic |
| COL1A2 | immunogenic |
| COL5A2 | immunogenic |
| COL6A3 | immunogenic |
| CPEB1 | immunogenic |
| CPXM2 | immunogenic |
| CREBZF | immunogenic |
| CST6 | immunogenic |
| CSTB | immunogenic |
| CTBP1 | immunogenic |
| CTBP2 | immunogenic |
| CXCL14 | immunogenic |
| CXCR5 | immunogenic |
| CXXC1 | immunogenic |
| DCBLD2 | immunogenic |
| DDAH1 | immunogenic |
| DDX21 | immunogenic |
| DDX6 | immunogenic |
| DESI2 | immunogenic |
| DIXDC1 | immunogenic |
| DLL3 | immunogenic |
| DMAP1 | immunogenic |
| DONSON | immunogenic |
| DTX1 | immunogenic |
| E2F3 | immunogenic |
| EBF3 | immunogenic |
| EFNA2 | immunogenic |
| EFS | immunogenic |
| EIF3A | immunogenic |
| EIF3D | immunogenic |
| EIF6 | immunogenic |
| EPHB3 | immunogenic |
| ETV4 | immunogenic |
| EXO1 | immunogenic |
| FADS2 | immunogenic |
| FAM83D | immunogenic |
| FBXO32 | immunogenic |
| FBXO8 | immunogenic |
| FES | immunogenic |
| FGF18 | immunogenic |
| FOXK2 | immunogenic |
| FSTL1 | immunogenic |
| FTO | immunogenic |
| FUBP1 | immunogenic |
| FZR1 | immunogenic |
| GALNT2 | immunogenic |
| GEMIN2 | immunogenic |
| GJB4 | immunogenic |
| GKN1 | immunogenic |
| GNAT1 | immunogenic |
| GPC4 | immunogenic |
| GSDME | immunogenic |
| GSTZ1 | immunogenic |
| GTF2A1 | immunogenic |
| GTPBP4 | immunogenic |
| HFE | immunogenic |
| HIKESHI | immunogenic |
| HLA-DQB1 | immunogenic |
| HNRNPDL | immunogenic |
| ICOS | immunogenic |
| IFRD1 | immunogenic |
| IL17RA | immunogenic |
| IL1RL1 | immunogenic |
| IPO4 | immunogenic |
| IRGM | immunogenic |
| KCNH2 | immunogenic |
| KDM5D | immunogenic |
| KDM7A | immunogenic |
| KIF26B | immunogenic |
| KLF16 | immunogenic |
| KLF6 | immunogenic |
| KLHL6 | immunogenic |
| KLHL7 | immunogenic |
| KRT1 | immunogenic |
| LEF1 | immunogenic |
| LIF | immunogenic |
| LYN | immunogenic |
| LYPD5 | immunogenic |
| MAML3 | immunogenic |
| MAP3K20 | immunogenic |
| MAPK8IP1 | immunogenic |
| MARVELD2 | immunogenic |
| MFSD2A | immunogenic |
| MICB | immunogenic |
| MMP10 | immunogenic |
| MOS | immunogenic |
| MRPL33 | immunogenic |
| MSI2 | immunogenic |
| MTAP | immunogenic |
| MUC13 | immunogenic |
| MUS81 | immunogenic |
| MYCL | immunogenic |
| MYT1L | immunogenic |
| NAB1 | immunogenic |
| NBAS | immunogenic |
| NDRG4 | immunogenic |
| NEIL1 | immunogenic |
| NMI | immunogenic |
| NPTX1 | immunogenic |
| NQO2 | immunogenic |
| NTHL1 | immunogenic |
| NUAK2 | immunogenic |
| NUP37 | immunogenic |
| OLFML2B | immunogenic |
| OSMR | immunogenic |
| PAIP1 | immunogenic |
| PAK5 | immunogenic |
| PCDH8 | immunogenic |
| PDRG1 | immunogenic |
| PGAP3 | immunogenic |
| PHF10 | immunogenic |
| PIK3AP1 | immunogenic |
| PITPNC1 | immunogenic |
| PLS3 | immunogenic |
| PMEPA1 | immunogenic |
| PNMT | immunogenic |
| POU2F2 | immunogenic |
| PPAT | immunogenic |
| PPBP | immunogenic |
| PPFIA3 | immunogenic |
| PPP1R12A | immunogenic |
| PRNP | immunogenic |
| PRSS23 | immunogenic |
| PSMA1 | immunogenic |
| PSMA7 | immunogenic |
| PSMD4 | immunogenic |
| PTGR1 | immunogenic |
| PTPRG | immunogenic |
| PTX3 | immunogenic |
| RAB22A | immunogenic |
| RAB23 | immunogenic |
| RAB3IP | immunogenic |
| RABEP1 | immunogenic |
| RAI14 | immunogenic |
| RASSF7 | immunogenic |
| RBM47 | immunogenic |
| RHOB | immunogenic |
| RNF138 | immunogenic |
| RNF31 | immunogenic |
| ROCK2 | immunogenic |
| RPL10 | immunogenic |
| RPS12 | immunogenic |
| RSRC1 | immunogenic |
| RTKN | immunogenic |
| RUFY1 | immunogenic |
| RUFY3 | immunogenic |
| S100A14 | immunogenic |
| SEMA3E | immunogenic |
| SERPINE2 | immunogenic |
| SETD7 | immunogenic |
| SEZ6L2 | immunogenic |
| SGCB | immunogenic |
| SHMT2 | immunogenic |
| SLC17A9 | immunogenic |
| SLC1A2 | immunogenic |
| SLC22A16 | immunogenic |
| SLC23A2 | immunogenic |
| SLC52A2 | immunogenic |
| SLC8A1 | immunogenic |
| SND1 | immunogenic |
| SNHG20 | immunogenic |
| SNX1 | immunogenic |
| SNX9 | immunogenic |
| SOCS6 | immunogenic |
| SOX1 | immunogenic |
| SPPL2A | immunogenic |
| SRCIN1 | immunogenic |
| STAMBPL1 | immunogenic |
| STAT6 | immunogenic |
| STK33 | immunogenic |
| SUGT1 | immunogenic |
| TCF21 | immunogenic |
| TCF4 | immunogenic |
| TCF7L2 | immunogenic |
| TEAD4 | immunogenic |
| TES | immunogenic |
| THEG | immunogenic |
| TINF2 | immunogenic |
| TMEM41A | immunogenic |
| TNFRSF4 | immunogenic |
| TNIP1 | immunogenic |
| TRIM3 | immunogenic |
| TWIST2 | immunogenic |
| TWSG1 | immunogenic |
| UBA2 | immunogenic |
| UBE2T | immunogenic |
| UBQLN1 | immunogenic |
| UFM1 | immunogenic |
| ULBP1 | immunogenic |
| UNC5CL | immunogenic |
| USP14 | immunogenic |
| USP47 | immunogenic |
| VAV1 | immunogenic |
| VAV2 | immunogenic |
| VPS37A | immunogenic |
| VPS50 | immunogenic |
| VTA1 | immunogenic |
| WDR5 | immunogenic |
| ZBTB4 | immunogenic |
| ZC3H13 | immunogenic |
| ZFPL1 | immunogenic |
| ZNF3 | immunogenic |
| ZNRD1ASP | immunogenic |
| ANKRD22 | immunogenic |
| DCXR | immunogenic |
| ZIC4 | immunogenic |
| PLEK2 | immunogenic |
| ABCG8 | immunogenic |
| RNF125 | immunogenic |
| TENM4 | immunogenic |
| CR1 | immunogenic |
| SSBP2 | immunogenic |
| TPD52 | immunogenic |
| NCR1 | immunogenic |
| UCHL5 | immunogenic |
| MMP23B | immunogenic |
| MACROD2 | immunogenic |
| ASPH | immunogenic |
| JAK3 | immunogenic |
| PLXDC2 | immunogenic |
| CHAF1B | immunogenic |
| ITGA7 | immunogenic |
| ASAP1 | immunogenic |
| ATG4B | immunogenic |
| CDC45 | immunogenic |
| CDT1 | immunogenic |
| CXCL6 | immunogenic |
| PGPEP1 | immunogenic |
| INPP5D | immunogenic |
| CCNA1 | immunogenic |
| FXR1 | immunogenic |
| GCC1 | immunogenic |
| NAB2 | immunogenic |
| NIPBL | immunogenic |
| PER1 | immunogenic |
| MAP2K2 | immunogenic |
| NMU | immunogenic |
| ATG2B | immunogenic |
| BCL11B | immunogenic |
| CSTA | immunogenic |
| DOCK5 | immunogenic |
| DSPP | immunogenic |
| DST | immunogenic |
| KRT16 | immunogenic |
| MAPK10 | immunogenic |
| MYO1B | immunogenic |
| P2RX1 | immunogenic |
| PLEC | immunogenic |
| PWP1 | immunogenic |
| SELENBP1 | immunogenic |
| SH3KBP1 | immunogenic |
| WNT5B | immunogenic |
| CTSH | immunogenic |
| VAMP7 | immunogenic |
| RBL2 | immunogenic |
| ACTA1 | immunogenic |
| AJUBA | immunogenic |
| CBL | immunogenic |
| CHP1 | immunogenic |
| CKMT1B | immunogenic |
| CYP26A1 | immunogenic |
| DDX3X | immunogenic |
| DYNC1H1 | immunogenic |
| DYRK1A | immunogenic |
| EXT1 | immunogenic |
| FBXO4 | immunogenic |
| FTL | immunogenic |
| GZMM | immunogenic |
| IVL | immunogenic |
| KRT13 | immunogenic |
| MAML1 | immunogenic |
| NCOR2 | immunogenic |
| P2RX3 | immunogenic |
| P2RX4 | immunogenic |
| P2RX6 | immunogenic |
| PBXIP1 | immunogenic |
| PTPRK | immunogenic |
| TALDO1 | immunogenic |
| TBP | immunogenic |
| TENM2 | immunogenic |
| TRAF4 | immunogenic |
| TUBB4B | immunogenic |
| POLQ | immunogenic |
| COL17A1 | immunogenic |
| KYNU | immunogenic |
| MAP3K4 | immunogenic |
| PTPRD | immunogenic |
| RMDN3 | immunogenic |
| CFDP1 | immunogenic |
| IRF4 | immunogenic |
| ARTN | immunogenic |
| CDK16 | immunogenic |
| COL7A1 | immunogenic |
| FAM114A2 | immunogenic |
| KPNA4 | immunogenic |
| PPP1R11 | immunogenic |
| RMDN1 | immunogenic |
| RSPO1 | immunogenic |
| SERPINB9 | immunogenic |
| SPRR1A | immunogenic |
| TP53RK | immunogenic |
| UBA5 | immunogenic |
| AATF | immunogenic |
| RAD18 | immunogenic |
| NID1 | immunogenic |
| CD164 | immunogenic |
| DEFB1 | immunogenic |
| PGRMC1 | immunogenic |
| CITED4 | immunogenic |
| STK32B | immunogenic |
| PIK3R2 | immunogenic |
| APOM | immunogenic |
| COBL | immunogenic |
| KIF5B | immunogenic |
| NEB | immunogenic |
| POU3F2 | immunogenic |
| TTN | immunogenic |
| TWF1 | immunogenic |
| BTN3A3 | immunogenic |
| LCK | immunogenic |
| LRRC8D | immunogenic |
| MORN5 | immunogenic |
| MS4A3 | immunogenic |
| MYH10 | immunogenic |
| NFYC | immunogenic |
| NPAS3 | immunogenic |
| PARN | immunogenic |
| PDIA6 | immunogenic |
| PRDM5 | immunogenic |
| RFC4 | immunogenic |
| SH2B3 | immunogenic |
| TRIM15 | immunogenic |
| TRIM26 | immunogenic |
| MCM4 | immunogenic |
| KLF10 | immunogenic |
| DGKA | immunogenic |
| CSRP1 | immunogenic |
| GPRC5C | immunogenic |
| GRHL1 | immunogenic |
| LMOD1 | immunogenic |
| MAP4 | immunogenic |
| MISP | immunogenic |
| PTP4A1 | immunogenic |
| PYGO2 | immunogenic |
| RND3 | immunogenic |
| SLC30A7 | immunogenic |
| WDR1 | immunogenic |
| YWHAG | immunogenic |
| MAD2L2 | immunogenic |
| ACP6 | immunogenic |
| AIFM1 | immunogenic |
| AMDHD1 | immunogenic |
| ATP1B2 | immunogenic |
| BTF3P11 | immunogenic |
| CACNA1C | immunogenic |
| CAV2 | immunogenic |
| CCDC34 | immunogenic |
| CD3E | immunogenic |
| CHRNA6 | immunogenic |
| CRCT1 | immunogenic |
| CTNND2 | immunogenic |
| DCK | immunogenic |
| DFFA | immunogenic |
| DHRS2 | immunogenic |
| DLG1 | immunogenic |
| DRG1 | immunogenic |
| DVL2 | immunogenic |
| DVL3 | immunogenic |
| ESD | immunogenic |
| EYA4 | immunogenic |
| FBXW4 | immunogenic |
| FGFRL1 | immunogenic |
| GCH1 | immunogenic |
| HECTD3 | immunogenic |
| HOOK2 | immunogenic |
| IL15RA | immunogenic |
| KRT4 | immunogenic |
| LTBP3 | immunogenic |
| MBD4 | immunogenic |
| MYL9 | immunogenic |
| NABP1 | immunogenic |
| NECTIN2 | immunogenic |
| NFATC2 | immunogenic |
| NKX2-8 | immunogenic |
| NUMB | immunogenic |
| OPRPN | immunogenic |
| PDS5A | immunogenic |
| POLM | immunogenic |
| RAB10 | immunogenic |
| RAB3D | immunogenic |
| RABGAP1L | immunogenic |
| RASGRP3 | immunogenic |
| RNF128 | immunogenic |
| RRAS2 | immunogenic |
| RTRAF | immunogenic |
| SLAMF1 | immunogenic |
| TCEAL1 | immunogenic |
| TGFB1I1 | immunogenic |
| THUMPD2 | immunogenic |
| TMEM176A | immunogenic |
| TOM1L1 | immunogenic |
| TPM2 | immunogenic |
| TTC17 | immunogenic |
| TUSC3 | immunogenic |
| UBE2K | immunogenic |
| ZAP70 | immunogenic |
| CELSR3 | immunogenic |
| LYPD3 | immunogenic |
| MCM3 | immunogenic |
| TNFSF9 | immunogenic |
| ADAM15 | immunogenic |
| BMP5 | immunogenic |
| CMTM5 | immunogenic |
| COX7A2L | immunogenic |
| EGFL6 | immunogenic |
| FETUB | immunogenic |
| HGD | immunogenic |
| KIF3B | immunogenic |
| LIN7C | immunogenic |
| MAPK6 | immunogenic |
| MYO5A | immunogenic |
| NNAT | immunogenic |
| RPS6KA4 | immunogenic |
| RPS6KA5 | immunogenic |
| SLC6A4 | immunogenic |
| NMT1 | immunogenic |
| ATP6V0D1 | immunogenic |
| PIDD1 | immunogenic |
| ADAM28 | immunogenic |
| ANKRD11 | immunogenic |
| ART1 | immunogenic |
| AUNIP | immunogenic |
| DCAF4 | immunogenic |
| EPS8 | immunogenic |
| FILIP1L | immunogenic |
| GJB5 | immunogenic |
| GRB10 | immunogenic |
| GSTA4 | immunogenic |
| GTF2E2 | immunogenic |
| HAS2 | immunogenic |
| ICAM5 | immunogenic |
| LTBP4 | immunogenic |
| LYNX1 | immunogenic |
| MAP2 | immunogenic |
| MCPH1 | immunogenic |
| METAP2 | immunogenic |
| MGST1 | immunogenic |
| MPLKIP | immunogenic |
| NCK1 | immunogenic |
| NFATC3 | immunogenic |
| NPRL2 | immunogenic |
| ONECUT1 | immunogenic |
| OTUD4 | immunogenic |
| PAK2 | immunogenic |
| PAK6 | immunogenic |
| PDE3A | immunogenic |
| PGP | immunogenic |
| PKP2 | immunogenic |
| PLCG1 | immunogenic |
| PSENEN | immunogenic |
| PSTPIP1 | immunogenic |
| RAB2A | immunogenic |
| RALA | immunogenic |
| SEMA4A | immunogenic |
| SLK | immunogenic |
| SMAD6 | immunogenic |
| SOCS2 | immunogenic |
| SOS2 | immunogenic |
| SPAM1 | immunogenic |
| TBX20 | immunogenic |
| TCF19 | immunogenic |
| TGFBRAP1 | immunogenic |
| TMC5 | immunogenic |
| UBA1 | immunogenic |
| UCN3 | immunogenic |
| MEMO1 | immunogenic |
| CDYL | immunogenic |
| COL22A1 | immunogenic |
| DAD1 | immunogenic |
| RAB38 | immunogenic |
| SRPX | immunogenic |
| ADGRV1 | immunogenic |
| BRSK2 | immunogenic |
| CACNA1A | immunogenic |
| FBXW11 | immunogenic |
| FER | immunogenic |
| FMOD | immunogenic |
| GFI1 | immunogenic |
| PIK3IP1 | immunogenic |
| POLD4 | immunogenic |
| PPP3CA | immunogenic |
| SETDB1 | immunogenic |
| SKA2 | immunogenic |
| SLC44A4 | immunogenic |
| SRRM4 | immunogenic |
| TAOK3 | immunogenic |
| TAP2 | immunogenic |
| USP32 | immunogenic |
| CYP27A1 | immunogenic |
| SNW1 | immunogenic |
| SPHKAP | immunogenic |
| ITGB3BP | immunogenic |
| ARX | immunogenic |
| QRSL1 | immunogenic |
| HSD17B3 | immunogenic |
| HPCA | immunogenic |
| CASP2 | immunogenic |
| PDXDC1 | immunogenic |
| RYR1 | immunogenic |
| SYNE2 | immunogenic |
| CSMD3 | immunogenic |
| ELOC | immunogenic |
| MLLT10 | immunogenic |
| PNKD | immunogenic |
| UNC5C | immunogenic |
| ZNF536 | immunogenic |
| GRB2 | immunogenic |
| LRRC4 | immunogenic |
| CNN1 | immunogenic |
| PGBD5 | immunogenic |
| RHD | immunogenic |
| JADE1 | immunogenic |
| MTHFD2 | immunogenic |
| NCOA6 | immunogenic |
| WTAP | immunogenic |
| ITPR2 | immunogenic |
| ACVR2B | immunogenic |
| ALDOB | immunogenic |
| ANKRD2 | immunogenic |
| CLTC | immunogenic |
| CTSG | immunogenic |
| DPF3 | immunogenic |
| ELF5 | immunogenic |
| GNAO1 | immunogenic |
| MAGI1 | immunogenic |
| PDGFC | immunogenic |
| CLN3 | immunogenic |
| RBM38 | immunogenic |
| ACTA2 | immunogenic |
| AGMAT | immunogenic |
| ALDH3B1 | immunogenic |
| APH1A | immunogenic |
| APLP2 | immunogenic |
| C19orf48 | immunogenic |
| CDH8 | immunogenic |
| CDHR5 | immunogenic |
| CHMP1A | immunogenic |
| CHMP1B | immunogenic |
| CISD3 | immunogenic |
| CORO6 | immunogenic |
| DAAM2 | immunogenic |
| DEF6 | immunogenic |
| DNAJB1 | immunogenic |
| ENPP3 | immunogenic |
| HAUS8 | immunogenic |
| HILPDA | immunogenic |
| HIVEP3 | immunogenic |
| HOXB3 | immunogenic |
| HSPB7 | immunogenic |
| LRRFIP1 | immunogenic |
| MAPK12 | immunogenic |
| MBNL2 | immunogenic |
| P3H4 | immunogenic |
| PDZK1 | immunogenic |
| PLIN3 | immunogenic |
| POGLUT3 | immunogenic |
| PPP1R13B | immunogenic |
| PYCR1 | immunogenic |
| RNASEH2A | immunogenic |
| RNF121 | immunogenic |
| RPAIN | immunogenic |
| SAG | immunogenic |
| SARS2 | immunogenic |
| SCUBE1 | immunogenic |
| SFMBT1 | immunogenic |
| SLC4A4 | immunogenic |
| SLC50A1 | immunogenic |
| SPAG4 | immunogenic |
| SPEN | immunogenic |
| SPTLC1 | immunogenic |
| SRXN1 | immunogenic |
| ST3GAL2 | immunogenic |
| STEAP3 | immunogenic |
| TEC | immunogenic |
| TMEM127 | immunogenic |
| TMIGD1 | immunogenic |
| TRAM1 | immunogenic |
| UBE2QL1 | immunogenic |
| NR1D2 | immunogenic |
| ATG16L2 | immunogenic |
| CREB3L4 | immunogenic |
| PSMA5 | immunogenic |
| CALU | immunogenic |
| OSBPL5 | immunogenic |
| RUNDC3A | immunogenic |
| BMPR1B | immunogenic |
| CERS4 | immunogenic |
| EIF1 | immunogenic |
| EPHA4 | immunogenic |
| MSRB1 | immunogenic |
| RENBP | immunogenic |
| SPNS1 | immunogenic |
| TMBIM6 | immunogenic |
| TXNRD3 | immunogenic |
| RHAG | immunogenic |
| ASF1B | immunogenic |
| LMNB1 | immunogenic |
| ZWINT | immunogenic |
| ALDH1B1 | immunogenic |
| ARL8B | immunogenic |
| CCNK | immunogenic |
| CD302 | immunogenic |
| GATA1 | immunogenic |
| PPP2R2A | immunogenic |
| RBM25 | immunogenic |
| STEAP1 | immunogenic |
| TTLL12 | immunogenic |
| ALOXE3 | immunogenic |
| APOA5 | immunogenic |
| ASB2 | immunogenic |
| B3GNT2 | immunogenic |
| BNIP2 | immunogenic |
| CACNA1D | immunogenic |
| CACNA2D2 | immunogenic |
| CLGN | immunogenic |
| FGD4 | immunogenic |
| GGPS1 | immunogenic |
| GPC5 | immunogenic |
| GPR31 | immunogenic |
| MYO1C | immunogenic |
| MYO1E | immunogenic |
| NOG | immunogenic |
| NPL | immunogenic |
| OR51E2 | immunogenic |
| OSBPL10 | immunogenic |
| RAC3 | immunogenic |
| RASA2 | immunogenic |
| SIGMAR1 | immunogenic |
| SLC39A4 | immunogenic |
| STK38 | immunogenic |
| XRN1 | immunogenic |
| SCARB2 | immunogenic |
| ABHD5 | immunogenic |
| ADGRA2 | immunogenic |
| AMOTL1 | immunogenic |
| ARHGEF1 | immunogenic |
| ARMC2 | immunogenic |
| ARVCF | immunogenic |
| ATOX1 | immunogenic |
| BCAS2 | immunogenic |
| C17orf49 | immunogenic |
| C17orf80 | immunogenic |
| CCDC181 | immunogenic |
| CD84 | immunogenic |
| CFL2 | immunogenic |
| CHMP4C | immunogenic |
| COL6A1 | immunogenic |
| COPB1 | immunogenic |
| DEPDC1B | immunogenic |
| DGAT1 | immunogenic |
| DOCK2 | immunogenic |
| DOHH | immunogenic |
| DUSP10 | immunogenic |
| DUSP16 | immunogenic |
| EAF1 | immunogenic |
| EFEMP2 | immunogenic |
| ELOVL7 | immunogenic |
| ENDOD1 | immunogenic |
| EPS8L3 | immunogenic |
| EXO5 | immunogenic |
| FBRS | immunogenic |
| FKBP7 | immunogenic |
| FOXB2 | immunogenic |
| FRG1 | immunogenic |
| GALNT4 | immunogenic |
| GPS2 | immunogenic |
| HES5 | immunogenic |
| HPRT1 | immunogenic |
| HSD17B11 | immunogenic |
| HSPBAP1 | immunogenic |
| IGHG1 | immunogenic |
| IREB2 | immunogenic |
| IRX4 | immunogenic |
| KCNA5 | immunogenic |
| KCNK2 | immunogenic |
| KIF3A | immunogenic |
| KLF13 | immunogenic |
| LIMK2 | immunogenic |
| LMTK2 | immunogenic |
| LPCAT1 | immunogenic |
| LPXN | immunogenic |
| LRIG3 | immunogenic |
| LRRC58 | immunogenic |
| LSM1 | immunogenic |
| MAN2C1 | immunogenic |
| MEAF6 | immunogenic |
| MLH3 | immunogenic |
| MYH11 | immunogenic |
| MYH6 | immunogenic |
| NR2C1 | immunogenic |
| NR6A1 | immunogenic |
| NSMCE1 | immunogenic |
| NUMBL | immunogenic |
| NUP43 | immunogenic |
| OLR1 | immunogenic |
| PARM1 | immunogenic |
| PCNT | immunogenic |
| PDCD10 | immunogenic |
| PDK4 | immunogenic |
| PICK1 | immunogenic |
| PKN1 | immunogenic |
| POLA1 | immunogenic |
| POLR3G | immunogenic |
| PPP1CB | immunogenic |
| PRG2 | immunogenic |
| PRKAR2A | immunogenic |
| PRUNE2 | immunogenic |
| PSMC6 | immunogenic |
| PTP4A2 | immunogenic |
| PTPRS | immunogenic |
| PXDN | immunogenic |
| QSOX1 | immunogenic |
| RBM6 | immunogenic |
| RGS17 | immunogenic |
| RNF41 | immunogenic |
| RNF7 | immunogenic |
| ROM1 | immunogenic |
| RPL22L1 | immunogenic |
| SAP30L | immunogenic |
| SLC30A1 | immunogenic |
| SLC30A6 | immunogenic |
| SLC31A1 | immunogenic |
| SLC35A2 | immunogenic |
| SMC3 | immunogenic |
| SNORD7 | immunogenic |
| SRCAP | immunogenic |
| SRD5A3 | immunogenic |
| STEAP2 | immunogenic |
| SWAP70 | immunogenic |
| TBATA | immunogenic |
| TMEM41B | immunogenic |
| TRIM11 | immunogenic |
| TRIP4 | immunogenic |
| TTC7A | immunogenic |
| USP12 | immunogenic |
| VPS36 | immunogenic |
| YIPF6 | immunogenic |
| ZMYND8 | immunogenic |
| RGS8 | immunogenic |
| CNTNAP4 | immunogenic |
| BPIFA1 | immunogenic |
| CHPF | immunogenic |
| CBLB | immunogenic |
| BCAS3 | immunogenic |
| DNAJC5 | immunogenic |
| APOA4 | immunogenic |
| CRLF1 | immunogenic |
| AGRN | immunogenic |
| DCSTAMP | immunogenic |
| ADAT2 | immunogenic |
| BEX3 | immunogenic |
| CDC14B | immunogenic |
| GABRB2 | immunogenic |
| HSDL2 | immunogenic |
| MAP3K14 | immunogenic |
| MYO1G | immunogenic |
| NUP93 | immunogenic |
| PGM1 | immunogenic |
| UBAC2 | immunogenic |
| ACOT9 | immunogenic |
| SLC6A14 | immunogenic |
| TULP3 | immunogenic |
| TGIF1 | immunogenic |
| UBL4A | immunogenic |
| CTPS1 | immunogenic |
| ICMT | immunogenic |
| LTB4R | immunogenic |
| ARPC4 | immunogenic |
| CYP51A1 | immunogenic |
| ENTPD2 | immunogenic |
| ENTPD8 | immunogenic |
| ERO1B | immunogenic |
| KCNJ11 | immunogenic |
| LAT2 | immunogenic |
| MSTO1 | immunogenic |
| PIP5K1B | immunogenic |
| RABIF | immunogenic |
| SOCS5 | immunogenic |
| ANO9 | immunogenic |
| ANXA8L1 | immunogenic |
| B3GALT5 | immunogenic |
| BICD1 | immunogenic |
| C16orf74 | immunogenic |
| C1GALT1C1 | immunogenic |
| C9 | immunogenic |
| CEP85L | immunogenic |
| CTRC | immunogenic |
| GCNT3 | immunogenic |
| GRIA3 | immunogenic |
| HASPIN | immunogenic |
| IL18BP | immunogenic |
| INSIG2 | immunogenic |
| KCMF1 | immunogenic |
| KIFAP3 | immunogenic |
| LFNG | immunogenic |
| MACROD1 | immunogenic |
| MOB4 | immunogenic |
| NCSTN | immunogenic |
| NECTIN3 | immunogenic |
| NFAT5 | immunogenic |
| NKD1 | immunogenic |
| PAPOLA | immunogenic |
| PRPF40A | immunogenic |
| RAB20 | immunogenic |
| RAD54L | immunogenic |
| RGS16 | immunogenic |
| RUVBL1 | immunogenic |
| SEMA3D | immunogenic |
| SEMA7A | immunogenic |
| SH3D21 | immunogenic |
| SLC32A1 | immunogenic |
| SLC7A8 | immunogenic |
| SLCO3A1 | immunogenic |
| SNHG9 | immunogenic |
| TCEA3 | immunogenic |
| ZNF281 | immunogenic |
| CBR4 | immunogenic |
| MYO3A | immunogenic |
| WNK4 | immunogenic |
| AATK | immunogenic |
| MRPS22 | immunogenic |
| DPH1 | immunogenic |
| BDH2 | immunogenic |
| DPP8 | immunogenic |
| PAPPA | immunogenic |
| PDZRN3 | immunogenic |
| PHF19 | immunogenic |
| PSD3 | immunogenic |
| SLC31A2 | immunogenic |
| EPC1 | immunogenic |
| FBXL22 | immunogenic |
| CPA1 | immunogenic |
| FKBPL | immunogenic |
| RNF168 | immunogenic |
| SLC20A1 | immunogenic |
| TADA3 | immunogenic |
| CCNT1 | immunogenic |
| ALDH3A2 | immunogenic |
| DOK4 | immunogenic |
| PUM1 | immunogenic |
| SIK3 | immunogenic |
| ADAM22 | immunogenic |
| CAMK2D | immunogenic |
| CD93 | immunogenic |
| CHODL | immunogenic |
| CMYA5 | immunogenic |
| DNAJB4 | immunogenic |
| KIF16B | immunogenic |
| LECT2 | immunogenic |
| PDIA2 | immunogenic |
| PNOC | immunogenic |
| RNF187 | immunogenic |
| YKT6 | immunogenic |
| TPD52L1 | immunogenic |
| BATF | immunogenic |
| IL12B | immunogenic |
| ASPA | immunogenic |
| ATG3 | immunogenic |
| ATP6V1E1 | immunogenic |
| ATP8A1 | immunogenic |
| ATXN7 | immunogenic |
| C4BPB | immunogenic |
| CBLC | immunogenic |
| CNKSR3 | immunogenic |
| COMMD9 | immunogenic |
| DISP1 | immunogenic |
| DLG3 | immunogenic |
| DNTTIP1 | immunogenic |
| DTX3 | immunogenic |
| DUT | immunogenic |
| EPG5 | immunogenic |
| FBLN5 | immunogenic |
| FBXL3 | immunogenic |
| FBXO17 | immunogenic |
| FBXO6 | immunogenic |
| FBXO7 | immunogenic |
| FDX1 | immunogenic |
| IGKC | immunogenic |
| KCTD20 | immunogenic |
| MAP2K3 | immunogenic |
| MSRA | immunogenic |
| MT4 | immunogenic |
| NCALD | immunogenic |
| NIT1 | immunogenic |
| NKTR | immunogenic |
| NME4 | immunogenic |
| OGN | immunogenic |
| PCDHB13 | immunogenic |
| POLK | immunogenic |
| RALGPS2 | immunogenic |
| RHOV | immunogenic |
| RNF111 | immunogenic |
| RNF38 | immunogenic |
| RPLP0 | immunogenic |
| SERINC1 | immunogenic |
| SHQ1 | immunogenic |
| SIVA1 | immunogenic |
| SLC46A1 | immunogenic |
| SNAI3 | immunogenic |
| STXBP5 | immunogenic |
| TBC1D7 | immunogenic |
| TIAM2 | immunogenic |
| TM4SF4 | immunogenic |
| TMEM106B | immunogenic |
| TRMO | immunogenic |
| TRMT11 | immunogenic |
| USP17L2 | immunogenic |
| USP27X | immunogenic |
| YAF2 | immunogenic |
| ZNF264 | immunogenic |
| UQCRC2 | immunogenic |
| NPDC1 | immunogenic |
| SYN2 | immunogenic |
| ALDH5A1 | immunogenic |
| CELSR1 | immunogenic |
| PPP2R2B | immunogenic |
| OLIG2 | immunogenic |
| NOSIP | immunogenic |
| UBE2L6 | immunogenic |
| CA13 | immunogenic |
| CD79A | immunogenic |
| COX7B2 | immunogenic |
| HLA-DRB4 | immunogenic |
| MLYCD | immunogenic |
| PLCD3 | immunogenic |
| PLSCR1 | immunogenic |
| RAET1E | immunogenic |
| SGSM1 | immunogenic |
| CRTC3 | immunogenic |
| LTBP1 | immunogenic |
| SULT4A1 | immunogenic |
| TRAK1 | immunogenic |
| LMAN1 | immunogenic |
| PRDM4 | immunogenic |
| CACNA1G | immunogenic |
| DTX3L | immunogenic |
| VAC14 | immunogenic |
| GPR65 | immunogenic |
| NTM | immunogenic |
| MTCH2 | immunogenic |
| MRPS28 | immunogenic |
| ALKBH8 | immunogenic |
| B4GAT1 | immunogenic |
| CMC2 | immunogenic |
| CTU1 | immunogenic |
| KLHDC10 | immunogenic |
| LBX1 | immunogenic |
| METTL6 | immunogenic |
| NDUFS3 | immunogenic |
| PPP1R12B | immunogenic |
| RMND1 | immunogenic |
| RNF115 | immunogenic |
| SLC10A6 | immunogenic |
| TANK | immunogenic |
| UBLCP1 | immunogenic |
| AMOTL2 | immunogenic |
| ATXN3 | immunogenic |
| CCNL2 | immunogenic |
| DHCR7 | immunogenic |
| FEM1B | immunogenic |
| IPP | immunogenic |
| DGKE | immunogenic |
| ACAN | immunogenic |
| FMO5 | immunogenic |
| SRPRB | immunogenic |
| ACAD8 | immunogenic |
| ACTRT3 | immunogenic |
| AFDN | immunogenic |
| ARHGAP17 | immunogenic |
| ASCC2 | immunogenic |
| BICC1 | immunogenic |
| BOC | immunogenic |
| BVES | immunogenic |
| CASP8AP2 | immunogenic |
| CBLN2 | immunogenic |
| CCNDBP1 | immunogenic |
| CEP131 | immunogenic |
| CLUAP1 | immunogenic |
| CYFIP2 | immunogenic |
| DDHD1 | immunogenic |
| DSCC1 | immunogenic |
| ECT2L | immunogenic |
| EIF3G | immunogenic |
| HNRNPLL | immunogenic |
| LAMA5 | immunogenic |
| MALL | immunogenic |
| MBP | immunogenic |
| MS4A12 | immunogenic |
| MTM1 | immunogenic |
| MYO1A | immunogenic |
| NLRP5 | immunogenic |
| NME6 | immunogenic |
| PDE4B | immunogenic |
| PNKP | immunogenic |
| PRKG2 | immunogenic |
| PTPRM | immunogenic |
| REEP6 | immunogenic |
| RPE | immunogenic |
| RYR3 | immunogenic |
| SAC3D1 | immunogenic |
| SASS6 | immunogenic |
| SGMS2 | immunogenic |
| SMOC2 | immunogenic |
| TADA2A | immunogenic |
| TEKT5 | immunogenic |
| TMBIM1 | immunogenic |
| UTP23 | immunogenic |
| WHRN | immunogenic |
| SMC5 | immunogenic |
| KLC4 | immunogenic |
| LHFPL4 | immunogenic |
| B4GALT3 | immunogenic |
| CCDC3 | immunogenic |
| EMC6 | immunogenic |
| ITPKC | immunogenic |
| LRRC8E | immunogenic |
| SNAP23 | immunogenic |
| SNCB | immunogenic |
| ST6GALNAC5 | immunogenic |
| TCL1A | immunogenic |
| TENT4A | immunogenic |
| IRX2 | immunogenic |
| SH3PXD2A | immunogenic |
| SS18 | immunogenic |
| UHMK1 | immunogenic |
| TOR4A | immunogenic |
| APCS | immunogenic |
| ABCB11 | immunogenic |
| GLOD4 | immunogenic |
| OXCT1 | immunogenic |
| PPP2R2D | immunogenic |
| SLC25A12 | immunogenic |
| HPX | immunogenic |
| LPAR6 | immunogenic |
| PLCB2 | immunogenic |
| BCL2L13 | immunogenic |
| C2 | immunogenic |
| CACNA1S | immunogenic |
| FRMD5 | immunogenic |
| GLIPR2 | immunogenic |
| GNPAT | immunogenic |
| GOSR1 | immunogenic |
| GUCD1 | immunogenic |
| HELZ | immunogenic |
| HSF4 | immunogenic |
| KCTD10 | immunogenic |
| LDB2 | immunogenic |
| MEF2C | immunogenic |
| MYL12A | immunogenic |
| NCAN | immunogenic |
| NPAS1 | immunogenic |
| NRBP2 | immunogenic |
| RAB3A | immunogenic |
| SENP7 | immunogenic |
| SH2D4A | immunogenic |
| SLC46A3 | immunogenic |
| SNAPIN | immunogenic |
| TFR2 | immunogenic |
| XPOT | immunogenic |
| GBA | immunogenic |
| MPV17L | immunogenic |
| ABCB4 | immunogenic |
| ACADSB | immunogenic |
| ACOX2 | immunogenic |
| ACY3 | immunogenic |
| APOF | immunogenic |
| ARHGEF10L | immunogenic |
| ARMC10 | immunogenic |
| ATF5 | immunogenic |
| ATOH8 | immunogenic |
| B4GALT1 | immunogenic |
| BLVRA | immunogenic |
| CBX6 | immunogenic |
| CCDC178 | immunogenic |
| CD22 | immunogenic |
| CD3G | immunogenic |
| CDC40 | immunogenic |
| CHST11 | immunogenic |
| CLIP1 | immunogenic |
| DHX33 | immunogenic |
| DNAJC10 | immunogenic |
| DNMBP | immunogenic |
| DPY30 | immunogenic |
| DRAM1 | immunogenic |
| DSN1 | immunogenic |
| ECHDC2 | immunogenic |
| FAH | immunogenic |
| FRMD6 | immunogenic |
| GAS8 | immunogenic |
| GNAZ | immunogenic |
| GON4L | immunogenic |
| HPCAL1 | immunogenic |
| HRH3 | immunogenic |
| INMT | immunogenic |
| INTS3 | immunogenic |
| KANK3 | immunogenic |
| KBTBD11 | immunogenic |
| KLHL21 | immunogenic |
| KPNA3 | immunogenic |
| LHB | immunogenic |
| LNX1 | immunogenic |
| LRRC28 | immunogenic |
| LY9 | immunogenic |
| MAPK11 | immunogenic |
| MATN2 | immunogenic |
| MATR3 | immunogenic |
| METTL1 | immunogenic |
| MIF4GD | immunogenic |
| MOGAT2 | immunogenic |
| MRPS18B | immunogenic |
| MXRA8 | immunogenic |
| MYADM | immunogenic |
| NUDT21 | immunogenic |
| OCIAD2 | immunogenic |
| PDE6D | immunogenic |
| PLCG2 | immunogenic |
| PLOD3 | immunogenic |
| PLVAP | immunogenic |
| PPIL3 | immunogenic |
| PPM1F | immunogenic |
| PRPS1 | immunogenic |
| PSMG2 | immunogenic |
| RPS17 | immunogenic |
| RSU1 | immunogenic |
| SIX3 | immunogenic |
| SLC1A1 | immunogenic |
| SLC35A1 | immunogenic |
| SP6 | immunogenic |
| SPRYD4 | immunogenic |
| STAM2 | immunogenic |
| STX17 | immunogenic |
| SUMO2 | immunogenic |
| TCAM1P | immunogenic |
| TEX101 | immunogenic |
| TEX35 | immunogenic |
| TIPRL | immunogenic |
| TJP2 | immunogenic |
| TLN2 | immunogenic |
| TLNRD1 | immunogenic |
| TREX1 | immunogenic |
| TSHB | immunogenic |
| TTC23 | immunogenic |
| TUBB6 | immunogenic |
| TXNDC12 | immunogenic |
| XPO4 | immunogenic |
| ZCCHC4 | immunogenic |
| ZCRB1 | immunogenic |
| B9D1 | immunogenic |
| DEPDC7 | immunogenic |
| FHL3 | immunogenic |
| PGM5 | immunogenic |
| SNX10 | immunogenic |
| SVEP1 | immunogenic |
| VRK3 | immunogenic |
| ATP6V1C1 | immunogenic |
| CENPN | immunogenic |
| DIAPH2 | immunogenic |
| ENO3 | immunogenic |
| ALPK3 | immunogenic |
| NAT9 | immunogenic |
| PWWP3A | immunogenic |
| FMO2 | immunogenic |
| PNPO | immunogenic |
| ATP2B1 | immunogenic |
| CTSA | immunogenic |
| ITFG1 | immunogenic |
| SNX27 | immunogenic |
| TJP3 | immunogenic |
| DDAH2 | immunogenic |
| ERAL1 | immunogenic |
| OVGP1 | immunogenic |
| NFKBIZ | immunogenic |
| LRRFIP2 | immunogenic |
| STN1 | immunogenic |
| GMPR2 | immunogenic |
| TMEM63A | immunogenic |
| PLPP1 | immunogenic |
| RAD23A | immunogenic |
| URM1 | immunogenic |
| ZNF593 | immunogenic |
| ABRAXAS1 | immunogenic |
| HOXC4 | immunogenic |
| GPN3 | immunogenic |
| SH3GL1 | immunogenic |
| HCFC2 | immunogenic |
| RP9 | immunogenic |
| ZNF436 | immunogenic |
| CNFN | immunogenic |
| PORCN | immunogenic |
| DMRTB1 | immunogenic |
| TK2 | immunogenic |
| MATN3 | immunogenic |
| CFC1 | immunogenic |
| CBFA2T3 | immunogenic |
| BET1L | immunogenic |
| RFTN1 | immunogenic |
| SETD6 | immunogenic |
| INHBB | immunogenic |
| DEGS1 | immunogenic |
| GTF2F1 | immunogenic |
| STAG3 | immunogenic |
| AHCYL1 | immunogenic |
| ARHGAP27 | immunogenic |
| CALCRL | immunogenic |
| CHP2 | immunogenic |
| UGT2A1 | immunogenic |
| GNA11 | immunogenic |
| ADD2 | immunogenic |
| PDE7A | immunogenic |
| CGRRF1 | immunogenic |
| COPZ2 | immunogenic |
| ETF1 | immunogenic |
| GPCPD1 | immunogenic |
| SLC12A4 | immunogenic |
| TOX4 | immunogenic |
| TRDC | immunogenic |
| SPAG1 | immunogenic |
| UBE3B | immunogenic |
| DYSF | immunogenic |
| PACRG | immunogenic |
| DMAC2L | immunogenic |
| FCER1G | immunogenic |
| IMPA2 | immunogenic |
| KDSR | immunogenic |
| NUDT5 | immunogenic |
| PNCK | immunogenic |
| SMIM5 | immunogenic |
| LAS1L | immunogenic |
| BEND5 | immunogenic |
| COL27A1 | immunogenic |
| DCHS1 | immunogenic |
| DNAAF4 | immunogenic |
| EPDR1 | immunogenic |
| FXYD1 | immunogenic |
| ISLR | immunogenic |
| NME3 | immunogenic |
| PCCB | immunogenic |
| SUPT4H1 | immunogenic |
| WAC | immunogenic |
| DEFA6 | immunogenic |
| ABCD3 | immunogenic |
| ABCD4 | immunogenic |
| APPL2 | immunogenic |
| ARL6IP6 | immunogenic |
| C1orf21 | immunogenic |
| C1R | immunogenic |
| CCDC93 | immunogenic |
| CHPF2 | immunogenic |
| CSRNP3 | immunogenic |
| CYP46A1 | immunogenic |
| EXOSC8 | immunogenic |
| FN3K | immunogenic |
| HPS1 | immunogenic |
| INPP1 | immunogenic |
| LNX2 | immunogenic |
| MECR | immunogenic |
| MFAP3L | immunogenic |
| MPP3 | immunogenic |
| NDUFA1 | immunogenic |
| NUBPL | immunogenic |
| NXF2 | immunogenic |
| P2RY14 | immunogenic |
| PARP6 | immunogenic |
| PBX4 | immunogenic |
| PHACTR3 | immunogenic |
| PIK3R5 | immunogenic |
| PSMC2 | immunogenic |
| RAB21 | immunogenic |
| RASD2 | immunogenic |
| RNF216 | immunogenic |
| SDCBP2 | immunogenic |
| SLC22A15 | immunogenic |
| SLC25A24 | immunogenic |
| SLIT1 | immunogenic |
| SMAGP | immunogenic |
| SMAP1 | immunogenic |
| SORCS1 | immunogenic |
| TAF1B | immunogenic |
| TPST1 | immunogenic |
| TSC22D2 | immunogenic |
| VAMP5 | immunogenic |
| VPS26C | immunogenic |
| WDR54 | immunogenic |
| ZNF560 | immunogenic |
| TPMT | immunogenic |
| EHD4 | immunogenic |
| EPS8L2 | immunogenic |
| SCHIP1 | immunogenic |
| LGALS13 | immunogenic |
| SPATA9 | immunogenic |
| TAX1BP3 | immunogenic |
| GABRB1 | immunogenic |
| PPP1R1C | immunogenic |
| PSMC1 | immunogenic |
| CHD6 | immunogenic |
| RAB33A | immunogenic |
| ZRANB2 | immunogenic |
| DTX4 | immunogenic |
| ACTN3 | immunogenic |
| CHD2 | immunogenic |
| DYNLT3 | immunogenic |
| ECHDC1 | immunogenic |
| FAM210B | immunogenic |
| MAN1A1 | immunogenic |
| NCK2 | immunogenic |
| SNAP29 | immunogenic |
| GM2A | immunogenic |
| CD79B | immunogenic |
| SPRR1B | immunogenic |
| RSPH9 | immunogenic |
| CIR1 | immunogenic |
| CAMSAP3 | immunogenic |
| ERP44 | immunogenic |
| CAMKK1 | immunogenic |
| CASTOR1 | immunogenic |
| CTDP1 | immunogenic |
| DDX59 | immunogenic |
| GASK1B | immunogenic |
| GIT2 | immunogenic |
| GPR19 | immunogenic |
| MIPEP | immunogenic |
| MRPL17 | immunogenic |
| MYO7A | immunogenic |
| NINJ1 | immunogenic |
| P3H3 | immunogenic |
| RAB15 | immunogenic |
| SEC14L3 | immunogenic |
| STK11IP | immunogenic |
| TMEM132C | immunogenic |
| XRN2 | immunogenic |
| ZW10 | immunogenic |
| SNRPD1 | immunogenic |
| COL13A1 | immunogenic |
| LCP2 | immunogenic |
| STRN3 | immunogenic |
| VAMP2 | immunogenic |
| APLF | immunogenic |
| NTNG2 | immunogenic |
| PCMT1 | immunogenic |
| PPP3CC | immunogenic |
| TEF | immunogenic |
| DUSP14 | immunogenic |
| PSORS1C2 | immunogenic |
| GPX7 | immunogenic |
| ATP6V0A2 | immunogenic |
| BDH1 | immunogenic |
| CHORDC1 | immunogenic |
| GCSH | immunogenic |
| PGM3 | immunogenic |
| RASGRP2 | immunogenic |
| ANK3 | immunogenic |
| CA5A | immunogenic |
| CACNG2 | immunogenic |
| CCDC88C | immunogenic |
| EMID1 | immunogenic |
| MPHOSPH10 | immunogenic |
| MYL3 | immunogenic |
| NOL9 | immunogenic |
| PTPN5 | immunogenic |
| RAB11FIP1 | immunogenic |
| SEC16B | immunogenic |
| SIGIRR | immunogenic |
| TAAR1 | immunogenic |
| PPP3R1 | immunogenic |
| ACKR1 | immunogenic |
| AFF3 | immunogenic |
| APBA3 | immunogenic |
| ARHGDIG | immunogenic |
| C10orf88 | immunogenic |
| C1QA | immunogenic |
| CAMLG | immunogenic |
| CISD1 | immunogenic |
| CMC1 | immunogenic |
| CPXM1 | immunogenic |
| DMXL2 | immunogenic |
| DOCK4 | immunogenic |
| DUSP23 | immunogenic |
| EID3 | immunogenic |
| EIF2B1 | immunogenic |
| ENHO | immunogenic |
| FIG4 | immunogenic |
| GJC2 | immunogenic |
| GPATCH2 | immunogenic |
| HLA-DRB5 | immunogenic |
| KRT2 | immunogenic |
| LEPROT | immunogenic |
| LOXL3 | immunogenic |
| MAGEF1 | immunogenic |
| MFAP4 | immunogenic |
| MRPS18A | immunogenic |
| MRPS18C | immunogenic |
| MUSTN1 | immunogenic |
| NEFM | immunogenic |
| NFATC4 | immunogenic |
| NOS1AP | immunogenic |
| NSMCE2 | immunogenic |
| P3H1 | immunogenic |
| POLR2J | immunogenic |
| PPCDC | immunogenic |
| PPIL2 | immunogenic |
| PPP1R15B | immunogenic |
| PRIM1 | immunogenic |
| PRPF3 | immunogenic |
| PRR5L | immunogenic |
| RCAN3 | immunogenic |
| SCN1B | immunogenic |
| SGCG | immunogenic |
| SIL1 | immunogenic |
| SLC48A1 | immunogenic |
| SMC6 | immunogenic |
| STX18 | immunogenic |
| SUSD4 | immunogenic |
| TMEM126A | immunogenic |
| TTYH1 | immunogenic |
| TUBG1 | immunogenic |
| UBE2E3 | immunogenic |
| UCMA | immunogenic |
| UNC13D | immunogenic |
| USP38 | immunogenic |
| ZDHHC3 | immunogenic |
| ZNF131 | immunogenic |
| DTX2 | immunogenic |
| NENF | immunogenic |
| KIFC3 | immunogenic |
| MOSPD3 | immunogenic |
| TRAF3IP2 | immunogenic |
| POLR2D | immunogenic |
| RIOK3 | immunogenic |
| ACOT13 | immunogenic |
| POLE2 | immunogenic |
| GNG11 | immunogenic |
| YWHAB | immunogenic |
| CNTFR | immunogenic |
| GNPNAT1 | immunogenic |
| GCC2 | immunogenic |
| MX2 | immunogenic |
| NFS1 | immunogenic |
| THAP7 | immunogenic |
| ZCCHC8 | immunogenic |
| PHKG1 | immunogenic |
| RBM43 | immunogenic |
| MSANTD3 | immunogenic |
| FAF2 | immunogenic |
| GLP2R | immunogenic |
| GPR85 | immunogenic |
| MCUB | immunogenic |
| PRELID3B | immunogenic |
| AP3S2 | immunogenic |
| ATXN10 | immunogenic |
| C6orf120 | immunogenic |
| CCDC28B | immunogenic |
| EMC9 | immunogenic |
| GEMIN6 | immunogenic |
| HDHD5 | immunogenic |
| MRPS34 | immunogenic |
| MSRB2 | immunogenic |
| NAGA | immunogenic |
| NRGN | immunogenic |
| PHTF1 | immunogenic |
| PTCD2 | immunogenic |
| RIPOR1 | immunogenic |
| SEC24B | immunogenic |
| SIDT2 | immunogenic |
| STBD1 | immunogenic |
| TCTN3 | immunogenic |
| TGDS | immunogenic |
| TMEM223 | immunogenic |
| TUBA1A | immunogenic |
| ZBTB25 | immunogenic |
| CABP1 | immunogenic |
| NFKBIE | immunogenic |
| GNG10 | immunogenic |
| GNG3 | immunogenic |
| GNG5 | immunogenic |
| GNGT2 | immunogenic |
| ACER2 | immunogenic |
| ACTL6B | immunogenic |
| AGTRAP | immunogenic |
| AKAP5 | immunogenic |
| ARHGEF26 | immunogenic |
| ARHGEF3 | immunogenic |
| ART3 | immunogenic |
| ATG101 | immunogenic |
| ATP2A1 | immunogenic |
| C4orf19 | immunogenic |
| CABCOCO1 | immunogenic |
| CACNG4 | immunogenic |
| CALML5 | immunogenic |
| CALY | immunogenic |
| CAV3 | immunogenic |
| CCDC186 | immunogenic |
| CIB4 | immunogenic |
| CKMT2 | immunogenic |
| CLIP3 | immunogenic |
| CLPS | immunogenic |
| CMBL | immunogenic |
| CRLF2 | immunogenic |
| CRYGA | immunogenic |
| DBNDD1 | immunogenic |
| DCAF11 | immunogenic |
| DCAKD | immunogenic |
| DDX25 | immunogenic |
| DHRS7C | immunogenic |
| DNAJB12 | immunogenic |
| DOCK7 | immunogenic |
| DSCAM | immunogenic |
| DTD2 | immunogenic |
| DYNLT1 | immunogenic |
| ECEL1 | immunogenic |
| EVI5L | immunogenic |
| FADS3 | immunogenic |
| FBLN7 | immunogenic |
| FNBP1 | immunogenic |
| FXYD2 | immunogenic |
| GABRA2 | immunogenic |
| GABRG1 | immunogenic |
| GP9 | immunogenic |
| GPIHBP1 | immunogenic |
| GPR108 | immunogenic |
| GPRASP1 | immunogenic |
| HESX1 | immunogenic |
| IGSF5 | immunogenic |
| IL1RL2 | immunogenic |
| ILDR2 | immunogenic |
| IPPK | immunogenic |
| ISL2 | immunogenic |
| KCNMB4 | immunogenic |
| KCNN1 | immunogenic |
| KCTD4 | immunogenic |
| KCTD9 | immunogenic |
| KIRREL3 | immunogenic |
| KNDC1 | immunogenic |
| KREMEN2 | immunogenic |
| KRT34 | immunogenic |
| KRT85 | immunogenic |
| LAMP5 | immunogenic |
| LCA5 | immunogenic |
| LRRN3 | immunogenic |
| LYSMD2 | immunogenic |
| LYZL4 | immunogenic |
| MAP7D2 | immunogenic |
| MB21D2 | immunogenic |
| MCOLN2 | immunogenic |
| MGST3 | immunogenic |
| MRPL10 | immunogenic |
| MXD3 | immunogenic |
| MYL7 | immunogenic |
| MYO5C | immunogenic |
| MYOZ1 | immunogenic |
| NAT8L | immunogenic |
| NCMAP | immunogenic |
| NECAB2 | immunogenic |
| NFATC2IP | immunogenic |
| NHSL1 | immunogenic |
| NHSL2 | immunogenic |
| NPR2 | immunogenic |
| NUDT12 | immunogenic |
| OCSTAMP | immunogenic |
| PATJ | immunogenic |
| PCOLCE | immunogenic |
| PI4K2B | immunogenic |
| PIGW | immunogenic |
| PLCL2 | immunogenic |
| PTGIR | immunogenic |
| RIPOR2 | immunogenic |
| RNF220 | immunogenic |
| RRH | immunogenic |
| SEZ6 | immunogenic |
| SIAE | immunogenic |
| SLC17A6 | immunogenic |
| SLC25A23 | immunogenic |
| SLC35D3 | immunogenic |
| SLIRP | immunogenic |
| SLITRK1 | immunogenic |
| SMIM3 | immunogenic |
| SNAP91 | immunogenic |
| SPATA24 | immunogenic |
| SPATS2L | immunogenic |
| SVIP | immunogenic |
| TBC1D5 | immunogenic |
| THEM5 | immunogenic |
| TMEM150A | immunogenic |
| TMEM160 | immunogenic |
| TMEM161B | immunogenic |
| TMEM86B | immunogenic |
| TRAPPC12 | immunogenic |
| TRAPPC3 | immunogenic |
| TSR3 | immunogenic |
| TTC1 | immunogenic |
| TTYH3 | immunogenic |
| TUBB4A | immunogenic |
| U2SURP | immunogenic |
| UBN1 | immunogenic |
| UNCX | immunogenic |
| UNKL | immunogenic |
| VPS33A | immunogenic |
| ZDHHC13 | immunogenic |
| ZNF2 | immunogenic |
| ZNF467 | immunogenic |
| ZZEF1 | immunogenic |
| ATP6V1H | immunogenic |
| BLOC1S1 | immunogenic |
| C3AR1 | immunogenic |
| HGSNAT | immunogenic |
| FBXO43 | immunogenic |
| SPATC1 | immunogenic |
| C19orf44 | immunogenic |
| CALML4 | immunogenic |
| CNOT10 | immunogenic |
| MOBP | immunogenic |
| ODF2L | immunogenic |
| IGHA1 | immunogenic |
| IGHA2 | immunogenic |
| IGHM | immunogenic |
| IGKV3-20 | immunogenic |
| AAMDC | immunogenic |
| AARSD1 | immunogenic |
| ABCB8 | immunogenic |
| ABHD18 | immunogenic |
| ABHD4 | immunogenic |
| ACTR8 | immunogenic |
| AEN | immunogenic |
| AGBL3 | immunogenic |
| AGPAT5 | immunogenic |
| AIFM2 | immunogenic |
| AIRN | immunogenic |
| AKAP8L | immunogenic |
| AKIRIN1 | immunogenic |
| AKR1B15 | immunogenic |
| ALDH8A1 | immunogenic |
| ALG5 | immunogenic |
| ALS2 | immunogenic |
| AMIGO1 | immunogenic |
| AMMECR1L | immunogenic |
| ANAPC15 | immunogenic |
| ANKRD24 | immunogenic |
| ANKRD33B | immunogenic |
| ANKS6 | immunogenic |
| AP5S1 | immunogenic |
| APLP1 | immunogenic |
| AQP11 | immunogenic |
| ARHGAP45 | immunogenic |
| ARHGEF18 | immunogenic |
| ARL3 | immunogenic |
| ARL4D | immunogenic |
| ARL6 | immunogenic |
| ARPC5L | immunogenic |
| ARRDC2 | immunogenic |
| ART4 | immunogenic |
| ASB9 | immunogenic |
| ATL3 | immunogenic |
| ATP23 | immunogenic |
| ATP6V1D | immunogenic |
| ATP6V1G2 | immunogenic |
| ATPSCKMT | immunogenic |
| AVPI1 | immunogenic |
| AXDND1 | immunogenic |
| B3GALT1 | immunogenic |
| BCL2L15 | immunogenic |
| BET1 | immunogenic |
| BHMT2 | immunogenic |
| BICDL1 | immunogenic |
| BLK | immunogenic |
| BLOC1S2 | immunogenic |
| BOLA1 | immunogenic |
| BORCS6 | immunogenic |
| BPIFA3 | immunogenic |
| BTBD11 | immunogenic |
| BTF3L4 | immunogenic |
| C11orf24 | immunogenic |
| C11orf49 | immunogenic |
| C11orf52 | immunogenic |
| C11orf86 | immunogenic |
| C11orf98 | immunogenic |
| C12orf29 | immunogenic |
| C12orf4 | immunogenic |
| C14orf119 | immunogenic |
| C15orf39 | immunogenic |
| C15orf40 | immunogenic |
| C16orf72 | immunogenic |
| C16orf87 | immunogenic |
| C16orf90 | immunogenic |
| C16orf95 | immunogenic |
| C17orf75 | immunogenic |
| C19orf18 | immunogenic |
| C19orf25 | immunogenic |
| C1orf122 | immunogenic |
| C1orf131 | immunogenic |
| C1orf35 | immunogenic |
| C1QB | immunogenic |
| C1QC | immunogenic |
| C1RL | immunogenic |
| C20orf144 | immunogenic |
| C20orf27 | immunogenic |
| C22orf23 | immunogenic |
| C22orf39 | immunogenic |
| C2orf72 | immunogenic |
| C3orf62 | immunogenic |
| C3orf70 | immunogenic |
| C4A | immunogenic |
| C4B | immunogenic |
| C5orf47 | immunogenic |
| C5orf63 | immunogenic |
| C6orf118 | immunogenic |
| C7 | immunogenic |
| C7orf31 | immunogenic |
| C8A | immunogenic |
| C8B | immunogenic |
| C8orf82 | immunogenic |
| C9orf24 | immunogenic |
| C9orf64 | immunogenic |
| C9orf85 | immunogenic |
| CADM3 | immunogenic |
| CAMK2N2 | immunogenic |
| CAPN5 | immunogenic |
| CCDC103 | immunogenic |
| CCDC124 | immunogenic |
| CCDC127 | immunogenic |
| CCDC198 | immunogenic |
| CCDC22 | immunogenic |
| CCDC47 | immunogenic |
| CCDC57 | immunogenic |
| CCDC86 | immunogenic |
| CCDC90B | immunogenic |
| CCPG1 | immunogenic |
| CCSER2 | immunogenic |
| CD2BP2 | immunogenic |
| CD72 | immunogenic |
| CDAN1 | immunogenic |
| CDH20 | immunogenic |
| CDK5RAP1 | immunogenic |
| CDPF1 | immunogenic |
| CECR2 | immunogenic |
| CENPV | immunogenic |
| CFAP126 | immunogenic |
| CFAP298 | immunogenic |
| CFAP410 | immunogenic |
| CFAP61 | immunogenic |
| CGREF1 | immunogenic |
| CHCHD3 | immunogenic |
| CHCHD6 | immunogenic |
| CHIA | immunogenic |
| CHRNE | immunogenic |
| CHRNG | immunogenic |
| CHST14 | immunogenic |
| CHST5 | immunogenic |
| CIAO1 | immunogenic |
| CIDEB | immunogenic |
| CLCNKB | immunogenic |
| CLN8 | immunogenic |
| CLNS1A | immunogenic |
| CLPB | immunogenic |
| CLPP | immunogenic |
| CNNM2 | immunogenic |
| COA3 | immunogenic |
| COCH | immunogenic |
| COG1 | immunogenic |
| COL5A3 | immunogenic |
| COL6A4P1 | immunogenic |
| COLEC12 | immunogenic |
| COPG2IT1 | immunogenic |
| COPS4 | immunogenic |
| COQ10B | immunogenic |
| COQ7 | immunogenic |
| CRTAM | immunogenic |
| CRYAA | immunogenic |
| CRYBA2 | immunogenic |
| CSNK1G3 | immunogenic |
| CSTF3 | immunogenic |
| CYS1 | immunogenic |
| CZIB | immunogenic |
| DAPP1 | immunogenic |
| DBIL5P | immunogenic |
| DBX1 | immunogenic |
| DCAF7 | immunogenic |
| DDX18 | immunogenic |
| DDX55 | immunogenic |
| DENND1B | immunogenic |
| DHRS7B | immunogenic |
| DKKL1 | immunogenic |
| DMGDH | immunogenic |
| DNAAF2 | immunogenic |
| DNAJA4 | immunogenic |
| DNAJC17 | immunogenic |
| DNAJC18 | immunogenic |
| DNAJC22 | immunogenic |
| DNAJC24 | immunogenic |
| DNAJC7 | immunogenic |
| DPEP3 | immunogenic |
| DPH5 | immunogenic |
| DPM1 | immunogenic |
| DRAP1 | immunogenic |
| DTWD1 | immunogenic |
| DUSP11 | immunogenic |
| DUSP12 | immunogenic |
| DUSP19 | immunogenic |
| EARS2 | immunogenic |
| ECHDC3 | immunogenic |
| EDEM1 | immunogenic |
| EFCAB1 | immunogenic |
| ELMO2 | immunogenic |
| EMC2 | immunogenic |
| EMC8 | immunogenic |
| ENPP5 | immunogenic |
| ENTPD6 | immunogenic |
| EPYC | immunogenic |
| ERC2 | immunogenic |
| ERI1 | immunogenic |
| ETNK1 | immunogenic |
| EXOC3L4 | immunogenic |
| EXOC6B | immunogenic |
| EXOSC3 | immunogenic |
| EXOSC7 | immunogenic |
| EXTL2 | immunogenic |
| FABP5P1 | immunogenic |
| FAHD2A | immunogenic |
| FAM114A1 | immunogenic |
| FAM117B | immunogenic |
| FAM151B | immunogenic |
| FAM162B | immunogenic |
| FAM20A | immunogenic |
| FAM217A | immunogenic |
| FAM219A | immunogenic |
| FAM220A | immunogenic |
| FAM228A | immunogenic |
| FAM241B | immunogenic |
| FAM78A | immunogenic |
| FAM83G | immunogenic |
| FAM86B2 | immunogenic |
| FAM89A | immunogenic |
| FANCD2OS | immunogenic |
| FARP1 | immunogenic |
| FASTKD3 | immunogenic |
| FBXO21 | immunogenic |
| FBXO25 | immunogenic |
| FBXO42 | immunogenic |
| FCHO1 | immunogenic |
| FCHSD1 | immunogenic |
| FGD6 | immunogenic |
| FGFBP3 | immunogenic |
| FHAD1 | immunogenic |
| FLVCR2 | immunogenic |
| FLYWCH2 | immunogenic |
| FMC1 | immunogenic |
| FMO4 | immunogenic |
| FNDC4 | immunogenic |
| FNDC8 | immunogenic |
| FNTA | immunogenic |
| FRA10AC1 | immunogenic |
| FXYD7 | immunogenic |
| GABRA5 | immunogenic |
| GALNTL6 | immunogenic |
| GAPT | immunogenic |
| GAS2L3 | immunogenic |
| GFRA4 | immunogenic |
| GGTA2P | immunogenic |
| GIMAP1 | immunogenic |
| GIMAP4 | immunogenic |
| GINM1 | immunogenic |
| GKAP1 | immunogenic |
| GMIP | immunogenic |
| GNB1L | immunogenic |
| GNL1 | immunogenic |
| GNPDA1 | immunogenic |
| GOLGA7 | immunogenic |
| GRHPR | immunogenic |
| GRIK5 | immunogenic |
| GRIN2D | immunogenic |
| GSDMA | immunogenic |
| GTF2IRD2 | immunogenic |
| GUCY1B2 | immunogenic |
| GYG1 | immunogenic |
| GZMH | immunogenic |
| HACD4 | immunogenic |
| HAUS4 | immunogenic |
| HCN3 | immunogenic |
| HDHD2 | immunogenic |
| HEMK1 | immunogenic |
| HERC6 | immunogenic |
| HERPUD2 | immunogenic |
| HEXIM2 | immunogenic |
| HHATL | immunogenic |
| HINT3 | immunogenic |
| HMCES | immunogenic |
| HMG20A | immunogenic |
| HMGCL | immunogenic |
| HMGN3 | immunogenic |
| HS3ST1 | immunogenic |
| HSD17B7P2 | immunogenic |
| HSD3B7 | immunogenic |
| HSPB11 | immunogenic |
| HSPBP1 | immunogenic |
| IDI1 | immunogenic |
| IER3IP1 | immunogenic |
| IFI35 | immunogenic |
| IFT27 | immunogenic |
| IFT43 | immunogenic |
| IFT46 | immunogenic |
| IGHD | immunogenic |
| IGHG2 | immunogenic |
| IGHG4 | immunogenic |
| IGHV1OR21-1 | immunogenic |
| IGHV2-70 | immunogenic |
| IGHV4OR15-8 | immunogenic |
| IGKV1D-33 | immunogenic |
| IGKV2-40 | immunogenic |
| IGKV3D-11 | immunogenic |
| IGKV3D-20 | immunogenic |
| IGKV4-1 | immunogenic |
| IGLC1 | immunogenic |
| IGLC2 | immunogenic |
| IGLC3 | immunogenic |
| IGLC6 | immunogenic |
| IGLC7 | immunogenic |
| IGLL1 | immunogenic |
| IGLL5 | immunogenic |
| IGLV7-43 | immunogenic |
| IKBIP | immunogenic |
| ILVBL | immunogenic |
| INAFM1 | immunogenic |
| INSL6 | immunogenic |
| INSM2 | immunogenic |
| IQCH | immunogenic |
| IZUMO3 | immunogenic |
| JPH2 | immunogenic |
| KCNA4 | immunogenic |
| KCNAB3 | immunogenic |
| KCNE3 | immunogenic |
| KCNK16 | immunogenic |
| KCNQ4 | immunogenic |
| KDELR2 | immunogenic |
| KDELR3 | immunogenic |
| KEL | immunogenic |
| KERA | immunogenic |
| KIAA0040 | immunogenic |
| KIAA0895L | immunogenic |
| KLHDC8A | immunogenic |
| KLHL13 | immunogenic |
| KLHL42 | immunogenic |
| KLHL8 | immunogenic |
| KNOP1 | immunogenic |
| KRT78 | immunogenic |
| KRT84 | immunogenic |
| L3HYPDH | immunogenic |
| LBHD1 | immunogenic |
| LCE1D | immunogenic |
| LCE2B | immunogenic |
| LCMT1 | immunogenic |
| LCN10 | immunogenic |
| LEAP2 | immunogenic |
| LENEP | immunogenic |
| LENG9 | immunogenic |
| LHFPL3 | immunogenic |
| LIAS | immunogenic |
| LILRB3 | immunogenic |
| LLCFC1 | immunogenic |
| LMBRD1 | immunogenic |
| LMNTD1 | immunogenic |
| LRCH3 | immunogenic |
| LRR1 | immunogenic |
| LRRC15 | immunogenic |
| LRRC17 | immunogenic |
| LRRC27 | immunogenic |
| LRRC3 | immunogenic |
| LRRC46 | immunogenic |
| LRRIQ4 | immunogenic |
| LUC7L2 | immunogenic |
| LURAP1L | immunogenic |
| LY6G6E | immunogenic |
| LYPD2 | immunogenic |
| LYSMD3 | immunogenic |
| MAGOHB | immunogenic |
| MCFD2 | immunogenic |
| MED10 | immunogenic |
| MED26 | immunogenic |
| MED6 | immunogenic |
| MEP1B | immunogenic |
| METAP1 | immunogenic |
| METRN | immunogenic |
| METTL21A | immunogenic |
| METTL5 | immunogenic |
| MFNG | immunogenic |
| MFSD5 | immunogenic |
| MFSD6 | immunogenic |
| MGAT2 | immunogenic |
| MICOS13 | immunogenic |
| MID1IP1 | immunogenic |
| MITD1 | immunogenic |
| MMACHC | immunogenic |
| MOCOS | immunogenic |
| MORN1 | immunogenic |
| MRM1 | immunogenic |
| MRNIP | immunogenic |
| MRPL15 | immunogenic |
| MRPL18 | immunogenic |
| MRPL49 | immunogenic |
| MRPS12 | immunogenic |
| MRPS31 | immunogenic |
| MRPS35 | immunogenic |
| MRPS9 | immunogenic |
| MS4A10 | immunogenic |
| MTCH1 | immunogenic |
| MTERF4 | immunogenic |
| MTIF2 | immunogenic |
| MTMR9 | immunogenic |
| MTX2 | immunogenic |
| MVB12B | immunogenic |
| MXRA7 | immunogenic |
| MYL6 | immunogenic |
| MYMK | immunogenic |
| MYO1H | immunogenic |
| MYOM1 | immunogenic |
| MZT1 | immunogenic |
| NAA30 | immunogenic |
| NADK2 | immunogenic |
| NAT8 | immunogenic |
| NATD1 | immunogenic |
| NCBP3 | immunogenic |
| NCLN | immunogenic |
| NDFIP2 | immunogenic |
| NDOR1 | immunogenic |
| NDUFAF6 | immunogenic |
| NDUFAF7 | immunogenic |
| NFU1 | immunogenic |
| NIP7 | immunogenic |
| NKAIN4 | immunogenic |
| NKIRAS1 | immunogenic |
| NKX1-2 | immunogenic |
| NMNAT3 | immunogenic |
| NMT2 | immunogenic |
| NRDE2 | immunogenic |
| NRXN1 | immunogenic |
| NSMCE3 | immunogenic |
| NT5DC2 | immunogenic |
| NTN3 | immunogenic |
| NUDT14 | immunogenic |
| NUDT16L1 | immunogenic |
| NUDT19 | immunogenic |
| NUDT4 | immunogenic |
| NUDT7 | immunogenic |
| NXPH3 | immunogenic |
| OCEL1 | immunogenic |
| OFD1 | immunogenic |
| OGFOD3 | immunogenic |
| OR10J5 | immunogenic |
| OR2A7 | immunogenic |
| OR2S2 | immunogenic |
| OR51B2 | immunogenic |
| OR51B6 | immunogenic |
| OR56A5 | immunogenic |
| ORMDL1 | immunogenic |
| OSBPL3 | immunogenic |
| OSBPL6 | immunogenic |
| OSBPL9 | immunogenic |
| OSGEPL1 | immunogenic |
| OSTC | immunogenic |
| PACRGL | immunogenic |
| PACSIN1 | immunogenic |
| PACSIN2 | immunogenic |
| PACSIN3 | immunogenic |
| PATE4 | immunogenic |
| PBX2P1 | immunogenic |
| PCDH12 | immunogenic |
| PCDHGB4 | immunogenic |
| PCGF5 | immunogenic |
| PCGF6 | immunogenic |
| PCNX4 | immunogenic |
| PDIA5 | immunogenic |
| PEX3 | immunogenic |
| PEX7 | immunogenic |
| PFKFB1 | immunogenic |
| PFN4 | immunogenic |
| PGLYRP1 | immunogenic |
| PGM2 | immunogenic |
| PHACTR1 | immunogenic |
| PHF3 | immunogenic |
| PHKA1 | immunogenic |
| PHKA2 | immunogenic |
| PHYHD1 | immunogenic |
| PHYKPL | immunogenic |
| PICALM | immunogenic |
| PIGM | immunogenic |
| PIGP | immunogenic |
| PIGQ | immunogenic |
| PIN4 | immunogenic |
| PIP4P2 | immunogenic |
| PITX3 | immunogenic |
| PLA2G2E | immunogenic |
| PLBD2 | immunogenic |
| PLD3 | immunogenic |
| PLEKHA3 | immunogenic |
| PLEKHB2 | immunogenic |
| PLET1 | immunogenic |
| PLSCR3 | immunogenic |
| PMFBP1 | immunogenic |
| PMVK | immunogenic |
| POLR1A | immunogenic |
| POLR1E | immunogenic |
| POLR3GL | immunogenic |
| POU5F2 | immunogenic |
| PPIC | immunogenic |
| PPM1M | immunogenic |
| PPP1R3F | immunogenic |
| PPP2R5D | immunogenic |
| PPP3CB | immunogenic |
| PPP3R2 | immunogenic |
| PPP6R3 | immunogenic |
| PREB | immunogenic |
| PRELID2 | immunogenic |
| PRICKLE2 | immunogenic |
| PRSS36 | immunogenic |
| PRSS41 | immunogenic |
| PRSS44P | immunogenic |
| PTCD1 | immunogenic |
| PTER | immunogenic |
| PTPN21 | immunogenic |
| PUS3 | immunogenic |
| RAB3C | immunogenic |
| RASGEF1C | immunogenic |
| RBM18 | immunogenic |
| RBM20 | immunogenic |
| RBM34 | immunogenic |
| RBMS1 | immunogenic |
| RBPJL | immunogenic |
| RESP18 | immunogenic |
| RETSAT | immunogenic |
| RFLNA | immunogenic |
| RFLNB | immunogenic |
| RFNG | immunogenic |
| RFX4 | immunogenic |
| RGS7 | immunogenic |
| RGS7BP | immunogenic |
| RHBG | immunogenic |
| RILPL1 | immunogenic |
| RIMS1 | immunogenic |
| RINL | immunogenic |
| RMND5B | immunogenic |
| RNASEH1P1 | immunogenic |
| RNF122 | immunogenic |
| RNF151 | immunogenic |
| RNF165 | immunogenic |
| RNF208 | immunogenic |
| ROGDI | immunogenic |
| RP2 | immunogenic |
| RPAP3 | immunogenic |
| RPF2 | immunogenic |
| RPP21 | immunogenic |
| RPP30 | immunogenic |
| RPTN | immunogenic |
| RSL24D1 | immunogenic |
| RWDD1 | immunogenic |
| S100A11P1 | immunogenic |
| S100G | immunogenic |
| SAMD8 | immunogenic |
| SAP30 | immunogenic |
| SAP30BP | immunogenic |
| SAPCD1 | immunogenic |
| SCAMP5 | immunogenic |
| SCAPER | immunogenic |
| SCNM1 | immunogenic |
| SDHAF3 | immunogenic |
| SDR39U1 | immunogenic |
| SEC22A | immunogenic |
| SEC24D | immunogenic |
| SEC61B | immunogenic |
| SEMA5B | immunogenic |
| SEMA6C | immunogenic |
| SERINC3 | immunogenic |
| SERP2 | immunogenic |
| SERPINB12 | immunogenic |
| SERPINB8 | immunogenic |
| SGCD | immunogenic |
| SGF29 | immunogenic |
| SH2D1B | immunogenic |
| SH2D4B | immunogenic |
| SH3BGR | immunogenic |
| SH3BP5L | immunogenic |
| SH3YL1 | immunogenic |
| SHD | immunogenic |
| SHISA5 | immunogenic |
| SHISA9 | immunogenic |
| SHISAL1 | immunogenic |
| SHISAL2B | immunogenic |
| SHKBP1 | immunogenic |
| SLAMF6 | immunogenic |
| SLC16A13 | immunogenic |
| SLC23A1 | immunogenic |
| SLC25A14 | immunogenic |
| SLC25A30 | immunogenic |
| SLC25A53 | immunogenic |
| SLC35B1 | immunogenic |
| SLC35E3 | immunogenic |
| SLC35F4 | immunogenic |
| SLC4A1AP | immunogenic |
| SLC7A6OS | immunogenic |
| SLC9A2 | immunogenic |
| SLCO1C1 | immunogenic |
| SLX1B | immunogenic |
| SLX4IP | immunogenic |
| SMG9 | immunogenic |
| SMIM12 | immunogenic |
| SMIM15 | immunogenic |
| SMIM20 | immunogenic |
| SMIM23 | immunogenic |
| SMIM8 | immunogenic |
| SNAPC1 | immunogenic |
| SNORA64 | immunogenic |
| SNORC | immunogenic |
| SNORD55 | immunogenic |
| SNRPD2 | immunogenic |
| SNX24 | immunogenic |
| SNX7 | immunogenic |
| SOBP | immunogenic |
| SORCS2 | immunogenic |
| SP5 | immunogenic |
| SPACA1 | immunogenic |
| SPAST | immunogenic |
| SPATA17 | immunogenic |
| SPECC1L | immunogenic |
| SPEF1 | immunogenic |
| SPEM1 | immunogenic |
| SPINK9 | immunogenic |
| SPOPL | immunogenic |
| SPRYD7 | immunogenic |
| SRPK3 | immunogenic |
| SRRD | immunogenic |
| SSB | immunogenic |
| SSU72 | immunogenic |
| STAC | immunogenic |
| STIMATE | immunogenic |
| STK19B | immunogenic |
| STRADA | immunogenic |
| STX12 | immunogenic |
| STX4 | immunogenic |
| STX8 | immunogenic |
| SUDS3 | immunogenic |
| SURF2 | immunogenic |
| SYNC | immunogenic |
| SYNPO2L | immunogenic |
| SYPL2 | immunogenic |
| SYTL1 | immunogenic |
| TAS1R2 | immunogenic |
| TBC1D1 | immunogenic |
| TBC1D8B | immunogenic |
| TBCD | immunogenic |
| TCEANC2 | immunogenic |
| TEAD3 | immunogenic |
| TECTA | immunogenic |
| TEPP | immunogenic |
| TEPSIN | immunogenic |
| TEX2 | immunogenic |
| TEX261 | immunogenic |
| TEX30 | immunogenic |
| TIMM21 | immunogenic |
| TM4SF20 | immunogenic |
| TMCC2 | immunogenic |
| TMEM123 | immunogenic |
| TMEM126B | immunogenic |
| TMEM163 | immunogenic |
| TMEM170A | immunogenic |
| TMEM175 | immunogenic |
| TMEM183A | immunogenic |
| TMEM192 | immunogenic |
| TMEM216 | immunogenic |
| TMEM238 | immunogenic |
| TMEM248 | immunogenic |
| TMEM35A | immunogenic |
| TMEM53 | immunogenic |
| TMEM65 | immunogenic |
| TOLLIP | immunogenic |
| TOM1 | immunogenic |
| TOMM5 | immunogenic |
| TPRKB | immunogenic |
| TRAPPC2 | immunogenic |
| TRAPPC2B | immunogenic |
| TRAPPC5 | immunogenic |
| TRAPPC6B | immunogenic |
| TRDN | immunogenic |
| TRIM6 | immunogenic |
| TRMT10B | immunogenic |
| TRMT13 | immunogenic |
| TRPC2 | immunogenic |
| TSEN15 | immunogenic |
| TSPAN17 | immunogenic |
| TSPAN5 | immunogenic |
| TTC39C | immunogenic |
| TTC9 | immunogenic |
| TTC9B | immunogenic |
| TUBD1 | immunogenic |
| TXNDC16 | immunogenic |
| UBE2G1 | immunogenic |
| UBE2J1 | immunogenic |
| UBE2O | immunogenic |
| UBE2R2 | immunogenic |
| UBE2W | immunogenic |
| UBE3D | immunogenic |
| UBXN6 | immunogenic |
| UFSP2 | immunogenic |
| UNC80 | immunogenic |
| UNK | immunogenic |
| UPF3A | immunogenic |
| UTP11 | immunogenic |
| UVSSA | immunogenic |
| UXS1 | immunogenic |
| VAMP4 | immunogenic |
| VPS26B | immunogenic |
| VPS37B | immunogenic |
| VSTM2B | immunogenic |
| VXN | immunogenic |
| WASH2P | immunogenic |
| WASHC3 | immunogenic |
| WDR31 | immunogenic |
| WDR33 | immunogenic |
| WDR64 | immunogenic |
| WDR73 | immunogenic |
| WDR86 | immunogenic |
| WDR89 | immunogenic |
| WDR90 | immunogenic |
| WDSUB1 | immunogenic |
| WFIKKN2 | immunogenic |
| WFS1 | immunogenic |
| WIPI2 | immunogenic |
| XIRP2 | immunogenic |
| YARS2 | immunogenic |
| ZBTB22 | immunogenic |
| ZBTB41 | immunogenic |
| ZBTB49 | immunogenic |
| ZBTB8A | immunogenic |
| ZBTB9 | immunogenic |
| ZC3H6 | immunogenic |
| ZC3HC1 | immunogenic |
| ZCCHC14 | immunogenic |
| ZCCHC17 | immunogenic |
| ZCCHC3 | immunogenic |
| ZCWPW2 | immunogenic |
| ZFAND1 | immunogenic |
| ZFAND2A | immunogenic |
| ZFAND6 | immunogenic |
| ZFP14 | immunogenic |
| ZFP92 | immunogenic |
| ZFR2 | immunogenic |
| ZFYVE21 | immunogenic |
| ZGRF1 | immunogenic |
| ZNF235 | immunogenic |
| ZNF263 | immunogenic |
| ZNF358 | immunogenic |
| ZNF622 | immunogenic |
| ZNF688 | immunogenic |
| ZNF700 | immunogenic |
| ZNF773 | immunogenic |
| ZNF777 | immunogenic |
| ZNF81 | immunogenic |
| ZNF821 | immunogenic |
| ZNF841 | immunogenic |
| ZP3 | immunogenic |
| ZSCAN29 | immunogenic |
| ZXDC | immunogenic |
| ATG5 | immunogenic |
| BAX | immunogenic |
| CALR | immunogenic |
| CASP1 | immunogenic |
| CXCR3 | immunogenic |
| EIF2AK3 | immunogenic |
| HSP90AA1 | immunogenic |
| IFNA1 | immunogenic |
| IFNB1 | immunogenic |
| IFNGR1 | immunogenic |
| IL1B | immunogenic |
| IL1R1 | immunogenic |
| LY96 | immunogenic |
| NLRP3 | immunogenic |
| NT5E | immunogenic |
| P2RX7 | immunogenic |
| PDIA3 | immunogenic |
| PRF1 | immunogenic |
| ACP5 | ferroptosis |
| ACSM3 | ferroptosis |
| ADM | ferroptosis |
| AHR | ferroptosis |
| ARNT | ferroptosis |
| BRCA2 | ferroptosis |
| BRD2 | ferroptosis |
| CALR | ferroptosis |
| CDC42 | ferroptosis |
| CDV3 | ferroptosis |
| CKB | ferroptosis |
| CST7 | ferroptosis |
| CTSB | ferroptosis |
| CTSK | ferroptosis |
| CYP1A2 | ferroptosis |
| DDIT3 | ferroptosis |
| EBP | ferroptosis |
| ELANE | ferroptosis |
| ERAP1 | ferroptosis |
| ERN1 | ferroptosis |
| GALT | ferroptosis |
| GLB1 | ferroptosis |
| GLP1R | ferroptosis |
| HAMP | ferroptosis |
| HK1 | ferroptosis |
| HSPD1 | ferroptosis |
| IL10RB | ferroptosis |
| INSIG1 | ferroptosis |
| ISG15 | ferroptosis |
| JUN | ferroptosis |
| LCN2 | ferroptosis |
| MAOA | ferroptosis |
| MAPKAPK2 | ferroptosis |
| MAX | ferroptosis |
| MCL1 | ferroptosis |
| MPO | ferroptosis |
| MS4A1 | ferroptosis |
| MT2A | ferroptosis |
| MXD1 | ferroptosis |
| MYLIP | ferroptosis |
| NOCT | ferroptosis |
| OSTF1 | ferroptosis |
| PDXK | ferroptosis |
| PLEKHM1 | ferroptosis |
| PNO1 | ferroptosis |
| PPIA | ferroptosis |
| PSPH | ferroptosis |
| PTCRA | ferroptosis |
| RNASE2 | ferroptosis |
| SKAP2 | ferroptosis |
| SLC11A1 | ferroptosis |
| SNRPE | ferroptosis |
| SRR | ferroptosis |
| TBC1D8 | ferroptosis |
| TBXA2R | ferroptosis |
| TFRC | ferroptosis |
| TNFRSF25 | ferroptosis |
| TRIB3 | ferroptosis |
| VWF | ferroptosis |
| CDKN1C | ferroptosis |
| RET | ferroptosis |
| RNASE3 | ferroptosis |
| XRCC2 | ferroptosis |
| SMAD3 | ferroptosis |
| PLK1 | ferroptosis |
| FGFR1 | ferroptosis |
| BAX | ferroptosis |
| MYB | ferroptosis |
| CASP4 | ferroptosis |
| CD44 | ferroptosis |
| CYP2E1 | ferroptosis |
| GSN | ferroptosis |
| NME5 | ferroptosis |
| ABCA5 | ferroptosis |
| NQO1 | ferroptosis |
| BNIP3 | ferroptosis |
| CAPZB | ferroptosis |
| EPHB4 | ferroptosis |
| ERCC4 | ferroptosis |
| PIK3R3 | ferroptosis |
| RAB27A | ferroptosis |
| TCF3 | ferroptosis |
| CP | ferroptosis |
| RPS6KA2 | ferroptosis |
| CDC27 | ferroptosis |
| AIMP2 | ferroptosis |
| ANXA3 | ferroptosis |
| ARR3 | ferroptosis |
| ATG5 | ferroptosis |
| DCTN4 | ferroptosis |
| DOCK1 | ferroptosis |
| ELOVL5 | ferroptosis |
| H2AX | ferroptosis |
| HNRNPM | ferroptosis |
| IKBKE | ferroptosis |
| INF2 | ferroptosis |
| KIF22 | ferroptosis |
| LGALS1 | ferroptosis |
| LGALS8 | ferroptosis |
| NOTCH2 | ferroptosis |
| PCGF2 | ferroptosis |
| PEA15 | ferroptosis |
| PSIP1 | ferroptosis |
| RECQL | ferroptosis |
| SENP2 | ferroptosis |
| TMPRSS6 | ferroptosis |
| TMSB15A | ferroptosis |
| WARS2 | ferroptosis |
| WEE1 | ferroptosis |
| WNK1 | ferroptosis |
| WWC1 | ferroptosis |
| XRCC4 | ferroptosis |
| DMBT1 | ferroptosis |
| ACTR2 | ferroptosis |
| AURKB | ferroptosis |
| ALOX12 | ferroptosis |
| ARG2 | ferroptosis |
| BCAT2 | ferroptosis |
| BTG1 | ferroptosis |
| CCL15 | ferroptosis |
| GADD45G | ferroptosis |
| HOOK1 | ferroptosis |
| HSPA9 | ferroptosis |
| LINC00312 | ferroptosis |
| MICA | ferroptosis |
| MMRN1 | ferroptosis |
| MR1 | ferroptosis |
| REG3A | ferroptosis |
| RPL29 | ferroptosis |
| TCF7L1 | ferroptosis |
| THRA | ferroptosis |
| UBE2Z | ferroptosis |
| UNC5B | ferroptosis |
| USE1 | ferroptosis |
| CFLAR | ferroptosis |
| KRIT1 | ferroptosis |
| A1CF | ferroptosis |
| APOLD1 | ferroptosis |
| MCM3AP | ferroptosis |
| NNT | ferroptosis |
| PAQR4 | ferroptosis |
| KANK1 | ferroptosis |
| KDM4B | ferroptosis |
| SRSF7 | ferroptosis |
| PSAP | ferroptosis |
| ACYP2 | ferroptosis |
| AIF1 | ferroptosis |
| CAMKK2 | ferroptosis |
| CANX | ferroptosis |
| CLEC1B | ferroptosis |
| CPT1A | ferroptosis |
| DCLRE1C | ferroptosis |
| DESI1 | ferroptosis |
| HFE | ferroptosis |
| MFN2 | ferroptosis |
| MTAP | ferroptosis |
| MYCT1 | ferroptosis |
| NDRG3 | ferroptosis |
| NTHL1 | ferroptosis |
| PHF8 | ferroptosis |
| PITPNC1 | ferroptosis |
| PPBP | ferroptosis |
| PPP1R12A | ferroptosis |
| RDX | ferroptosis |
| RHOB | ferroptosis |
| RSRC1 | ferroptosis |
| SDAD1 | ferroptosis |
| SNHG20 | ferroptosis |
| SNHG3 | ferroptosis |
| TDG | ferroptosis |
| TMEM8B | ferroptosis |
| TNFRSF14 | ferroptosis |
| UPF1 | ferroptosis |
| YPEL1 | ferroptosis |
| FAM30A | ferroptosis |
| MPG | ferroptosis |
| SSBP2 | ferroptosis |
| TPD52 | ferroptosis |
| MAP7 | ferroptosis |
| CLDN10 | ferroptosis |
| NMU | ferroptosis |
| DST | ferroptosis |
| ACACB | ferroptosis |
| BMP7 | ferroptosis |
| DCTN3 | ferroptosis |
| ID2 | ferroptosis |
| NCOR2 | ferroptosis |
| NFYA | ferroptosis |
| RPL14 | ferroptosis |
| SRPK2 | ferroptosis |
| RHOBTB1 | ferroptosis |
| LAMTOR2 | ferroptosis |
| ZNF248 | ferroptosis |
| APOM | ferroptosis |
| GAS7 | ferroptosis |
| TPM4 | ferroptosis |
| MAP4 | ferroptosis |
| ADAMTS12 | ferroptosis |
| ARFRP1 | ferroptosis |
| CAPN3 | ferroptosis |
| COL2A1 | ferroptosis |
| FLII | ferroptosis |
| ITGA4 | ferroptosis |
| EEF1D | ferroptosis |
| HEATR3 | ferroptosis |
| RAB2A | ferroptosis |
| ZMYM4 | ferroptosis |
| NUDT6 | ferroptosis |
| CUL5 | ferroptosis |
| MTHFS | ferroptosis |
| RRBP1 | ferroptosis |
| F13A1 | ferroptosis |
| CTSG | ferroptosis |
| MAGT1 | ferroptosis |
| ST3GAL2 | ferroptosis |
| TRAM1 | ferroptosis |
| ALOX5AP | ferroptosis |
| EIF1 | ferroptosis |
| RBM25 | ferroptosis |
| SLC39A4 | ferroptosis |
| CDC5L | ferroptosis |
| DDX39B | ferroptosis |
| DNASE1L1 | ferroptosis |
| EFNA5 | ferroptosis |
| ENDOD1 | ferroptosis |
| FBXL4 | ferroptosis |
| ICA1 | ferroptosis |
| LPIN2 | ferroptosis |
| MID1 | ferroptosis |
| MYO9B | ferroptosis |
| NCOR1 | ferroptosis |
| NR2C1 | ferroptosis |
| PRG2 | ferroptosis |
| PXDN | ferroptosis |
| RNF40 | ferroptosis |
| SAP30L | ferroptosis |
| VGF | ferroptosis |
| ZNF32 | ferroptosis |
| ARHGEF10 | ferroptosis |
| PAFAH1B2 | ferroptosis |
| BICD1 | ferroptosis |
| BPHL | ferroptosis |
| PSRC1 | ferroptosis |
| SLC7A8 | ferroptosis |
| USP34 | ferroptosis |
| TAX1BP1 | ferroptosis |
| SGSM2 | ferroptosis |
| TADA3 | ferroptosis |
| ADAM22 | ferroptosis |
| ANK1 | ferroptosis |
| AZI2 | ferroptosis |
| DHX29 | ferroptosis |
| EEF1E1 | ferroptosis |
| EFNB3 | ferroptosis |
| FAM13A | ferroptosis |
| MTERF1 | ferroptosis |
| PPIP5K1 | ferroptosis |
| SIVA1 | ferroptosis |
| NUDT2 | ferroptosis |
| DIS3 | ferroptosis |
| IL27RA | ferroptosis |
| SUN1 | ferroptosis |
| RMND1 | ferroptosis |
| FEM1B | ferroptosis |
| FMO5 | ferroptosis |
| ASF1A | ferroptosis |
| CYFIP2 | ferroptosis |
| EFCAB2 | ferroptosis |
| EIF3M | ferroptosis |
| PLEKHA8P1 | ferroptosis |
| RPL28 | ferroptosis |
| TADA2A | ferroptosis |
| ZNF91 | ferroptosis |
| AHDC1 | ferroptosis |
| ITPKC | ferroptosis |
| LONP2 | ferroptosis |
| TENT4A | ferroptosis |
| PGLS | ferroptosis |
| CYTH2 | ferroptosis |
| HPX | ferroptosis |
| GGA3 | ferroptosis |
| COL8A2 | ferroptosis |
| EIF5B | ferroptosis |
| FKBP11 | ferroptosis |
| GIMAP5 | ferroptosis |
| INTS3 | ferroptosis |
| MXRA8 | ferroptosis |
| PSG9 | ferroptosis |
| RPS3A | ferroptosis |
| SUMO3 | ferroptosis |
| TOR1AIP1 | ferroptosis |
| TREX1 | ferroptosis |
| TRIM52 | ferroptosis |
| ATP8B1 | ferroptosis |
| DIAPH2 | ferroptosis |
| HTR4 | ferroptosis |
| RPL18 | ferroptosis |
| ZNF177 | ferroptosis |
| AOC1 | ferroptosis |
| TAC3 | ferroptosis |
| PURA | ferroptosis |
| GSTM4 | ferroptosis |
| NDE1 | ferroptosis |
| GNA11 | ferroptosis |
| WDR45 | ferroptosis |
| ZNF492 | ferroptosis |
| NME3 | ferroptosis |
| GLTP | ferroptosis |
| LYRM2 | ferroptosis |
| PIGN | ferroptosis |
| POLR2F | ferroptosis |
| RPAP1 | ferroptosis |
| RPL27A | ferroptosis |
| SCYL3 | ferroptosis |
| TRAF3IP3 | ferroptosis |
| TRIOBP | ferroptosis |
| ZNF232 | ferroptosis |
| ZNF43 | ferroptosis |
| ZHX3 | ferroptosis |
| PRRC2C | ferroptosis |
| DTX4 | ferroptosis |
| MRPL23 | ferroptosis |
| SPATA7 | ferroptosis |
| ZNF318 | ferroptosis |
| CIR1 | ferroptosis |
| RFC5 | ferroptosis |
| MS4A2 | ferroptosis |
| SECISBP2L | ferroptosis |
| ZNF93 | ferroptosis |
| ZNF614 | ferroptosis |
| CEBPG | ferroptosis |
| BTD | ferroptosis |
| PGM3 | ferroptosis |
| RAD1 | ferroptosis |
| RASGRP2 | ferroptosis |
| SLC40A1 | ferroptosis |
| C10orf88 | ferroptosis |
| CELSR2 | ferroptosis |
| DBR1 | ferroptosis |
| ECPAS | ferroptosis |
| EDAR | ferroptosis |
| GRK4 | ferroptosis |
| SLC24A3 | ferroptosis |
| ZFYVE26 | ferroptosis |
| POLR2D | ferroptosis |
| ZNF142 | ferroptosis |
| MX2 | ferroptosis |
| SUPT7L | ferroptosis |
| GPR12 | ferroptosis |
| CCDC28B | ferroptosis |
| CLN5 | ferroptosis |
| DCUN1D2 | ferroptosis |
| EML3 | ferroptosis |
| FBXO9 | ferroptosis |
| LMBR1L | ferroptosis |
| MED22 | ferroptosis |
| MID2 | ferroptosis |
| NAGA | ferroptosis |
| UGGT2 | ferroptosis |
| ZC2HC1A | ferroptosis |
| ZNF394 | ferroptosis |
| ZNF473 | ferroptosis |
| KCNN1 | ferroptosis |
| RIPOR2 | ferroptosis |
| TMEM160 | ferroptosis |
| AP4S1 | ferroptosis |
| BLOC1S1 | ferroptosis |
| AHCTF1 | ferroptosis |
| AOAH | ferroptosis |
| AP5S1 | ferroptosis |
| ARIH2 | ferroptosis |
| ARL4D | ferroptosis |
| ASMTL | ferroptosis |
| ATPAF2 | ferroptosis |
| C1orf50 | ferroptosis |
| C1orf54 | ferroptosis |
| C6orf62 | ferroptosis |
| CHST5 | ferroptosis |
| CIAO1 | ferroptosis |
| CIDEB | ferroptosis |
| CLASRP | ferroptosis |
| CLCN7 | ferroptosis |
| CMAHP | ferroptosis |
| CPA2 | ferroptosis |
| DALRD3 | ferroptosis |
| DAO | ferroptosis |
| DCAF10 | ferroptosis |
| DNAJC16 | ferroptosis |
| DPH5 | ferroptosis |
| DSTNP2 | ferroptosis |
| DTWD1 | ferroptosis |
| ENPP4 | ferroptosis |
| FAM89B | ferroptosis |
| GBF1 | ferroptosis |
| GID4 | ferroptosis |
| GOSR2 | ferroptosis |
| GPR153 | ferroptosis |
| HEMK1 | ferroptosis |
| HLA-F-AS1 | ferroptosis |
| HMCES | ferroptosis |
| HMGB3P1 | ferroptosis |
| HPS4 | ferroptosis |
| HYI | ferroptosis |
| IER3IP1 | ferroptosis |
| IFT27 | ferroptosis |
| IGLL1 | ferroptosis |
| IQCK | ferroptosis |
| IRGQ | ferroptosis |
| KCNA4 | ferroptosis |
| KCTD15 | ferroptosis |
| KIZ | ferroptosis |
| KLHL20 | ferroptosis |
| KLHL5 | ferroptosis |
| MAGOH2P | ferroptosis |
| MED14 | ferroptosis |
| MFSD11 | ferroptosis |
| MTCH1 | ferroptosis |
| MTERF4 | ferroptosis |
| MTMR12 | ferroptosis |
| MXD4 | ferroptosis |
| MYO15B | ferroptosis |
| NT5M | ferroptosis |
| NUDT3 | ferroptosis |
| OBSL1 | ferroptosis |
| OR1F1 | ferroptosis |
| ORAI2 | ferroptosis |
| OSGIN2 | ferroptosis |
| PAM16 | ferroptosis |
| PCIF1 | ferroptosis |
| PEX1 | ferroptosis |
| PHKA2 | ferroptosis |
| PICALM | ferroptosis |
| PLPPR3 | ferroptosis |
| PNPLA4 | ferroptosis |
| PTH2R | ferroptosis |
| RAB4A | ferroptosis |
| RANBP17 | ferroptosis |
| RAPGEF2 | ferroptosis |
| RBMS1 | ferroptosis |
| RC3H2 | ferroptosis |
| REX1BD | ferroptosis |
| RMND5B | ferroptosis |
| RNASE6 | ferroptosis |
| RPL10L | ferroptosis |
| RPL18A | ferroptosis |
| RPL23AP32 | ferroptosis |
| RPL23AP7 | ferroptosis |
| RPL7 | ferroptosis |
| RPS28 | ferroptosis |
| SCMH1 | ferroptosis |
| SDHAF1 | ferroptosis |
| SEL1L3 | ferroptosis |
| SFI1 | ferroptosis |
| SGF29 | ferroptosis |
| SH3BGR | ferroptosis |
| SH3D19 | ferroptosis |
| SLC35A3 | ferroptosis |
| SLC49A3 | ferroptosis |
| SMG7 | ferroptosis |
| SUPT6H | ferroptosis |
| SYNE3 | ferroptosis |
| TAF12 | ferroptosis |
| TAF1A | ferroptosis |
| TAF9B | ferroptosis |
| TBC1D9B | ferroptosis |
| THAP4 | ferroptosis |
| TMCO6 | ferroptosis |
| TMEM120B | ferroptosis |
| TMEM134 | ferroptosis |
| TMEM254 | ferroptosis |
| TMPRSS15 | ferroptosis |
| TOGARAM1 | ferroptosis |
| TSPAN5 | ferroptosis |
| TSR1 | ferroptosis |
| TUBAL3 | ferroptosis |
| TWF2 | ferroptosis |
| UBE2D4 | ferroptosis |
| UBFD1 | ferroptosis |
| UTP20 | ferroptosis |
| WIZ | ferroptosis |
| ZCCHC24 | ferroptosis |
| ZDHHC18 | ferroptosis |
| ZNF117 | ferroptosis |
| ZNF133 | ferroptosis |
| ZNF137P | ferroptosis |
| ZNF16 | ferroptosis |
| ZNF250 | ferroptosis |
| ZNF33B | ferroptosis |
| ZNF451 | ferroptosis |
| ZNF571 | ferroptosis |
| ZNF589 | ferroptosis |
| ZNF669 | ferroptosis |
| ZNF74 | ferroptosis |
| RPL8 | ferroptosis |
| IREB2 | ferroptosis |
| ATP5MC3 | ferroptosis |
| CS | ferroptosis |
| EMC2 | ferroptosis |
| ACSF2 | ferroptosis |
| NOX1 | ferroptosis |
| CYBB | ferroptosis |
| NOX3 | ferroptosis |
| NOX4 | ferroptosis |
| NOX5 | ferroptosis |
| DUOX1 | ferroptosis |
| DUOX2 | ferroptosis |
| G6PD | ferroptosis |
| PGD | ferroptosis |
| VDAC2 | ferroptosis |
| PIK3CA | ferroptosis |
| FLT3 | ferroptosis |
| SCP2 | ferroptosis |
| TP53 | ferroptosis |
| ACSL4 | ferroptosis |
| LPCAT3 | ferroptosis |
| NRAS | ferroptosis |
| KRAS | ferroptosis |
| HRAS | ferroptosis |
| TF | ferroptosis |
| TFR2 | ferroptosis |
| SLC38A1 | ferroptosis |
| SLC1A5 | ferroptosis |
| GLS2 | ferroptosis |
| GOT1 | ferroptosis |
| CARS1 | ferroptosis |
| ALOX5 | ferroptosis |
| KEAP1 | ferroptosis |
| HMOX1 | ferroptosis |
| ATG7 | ferroptosis |
| NCOA4 | ferroptosis |
| ALOX12B | ferroptosis |
| ALOX15 | ferroptosis |
| ALOX15B | ferroptosis |
| ALOXE3 | ferroptosis |
| PHKG2 | ferroptosis |
| ACO1 | ferroptosis |
| ULK1 | ferroptosis |
| ATG3 | ferroptosis |
| ATG4D | ferroptosis |
| BECN1 | ferroptosis |
| MAP1LC3A | ferroptosis |
| GABARAPL2 | ferroptosis |
| GABARAPL1 | ferroptosis |
| ATG16L1 | ferroptosis |
| WIPI1 | ferroptosis |
| WIPI2 | ferroptosis |
| SNX4 | ferroptosis |
| ATG13 | ferroptosis |
| ULK2 | ferroptosis |
| SAT1 | ferroptosis |
| EGFR | ferroptosis |
| MAPK3 | ferroptosis |
| MAPK1 | ferroptosis |
| BID | ferroptosis |
| ZEB1 | ferroptosis |
| DPP4 | ferroptosis |
| CDKN2A | ferroptosis |
| PEBP1 | ferroptosis |
| SOCS1 | ferroptosis |
| CDO1 | ferroptosis |
| MAPK8 | ferroptosis |
| MAPK9 | ferroptosis |
| CHAC1 | ferroptosis |
| MAPK14 | ferroptosis |
| LINC00472 | ferroptosis |
| PRKAA2 | ferroptosis |
| PRKAA1 | ferroptosis |
| ELAVL1 | ferroptosis |
| BAP1 | ferroptosis |
| ABCC1 | ferroptosis |
| MIR6852 | ferroptosis |
| ACVR1B | ferroptosis |
| TGFBR1 | ferroptosis |
| EPAS1 | ferroptosis |
| HILPDA | ferroptosis |
| HIF1A | ferroptosis |
| IFNG | ferroptosis |
| ANO6 | ferroptosis |
| LPIN1 | ferroptosis |
| HMGB1 | ferroptosis |
| TNFAIP3 | ferroptosis |
| TLR4 | ferroptosis |
| ATF3 | ferroptosis |
| ATM | ferroptosis |
| YY1AP1 | ferroptosis |
| EGLN2 | ferroptosis |
| MIOX | ferroptosis |
| TAFAZZIN | ferroptosis |
| MTDH | ferroptosis |
| IDH1 | ferroptosis |
| SIRT1 | ferroptosis |
| FBXW7 | ferroptosis |
| PANX1 | ferroptosis |
| DNAJB6 | ferroptosis |
| BACH1 | ferroptosis |
| LONP1 | ferroptosis |
| CD82 | ferroptosis |
| IL1B | ferroptosis |
| POR | ferroptosis |
| CYB5R1 | ferroptosis |
| FADS1 | ferroptosis |
| PTEN | ferroptosis |
| NR1D1 | ferroptosis |
| NR1D2 | ferroptosis |
| TBK1 | ferroptosis |
| IL6 | ferroptosis |
| USP7 | ferroptosis |
| ATF4 | ferroptosis |
| AQP3 | ferroptosis |
| AQP5 | ferroptosis |
| AQP8 | ferroptosis |
| LINC00618 | ferroptosis |
| MT1DP | ferroptosis |
| PEX10 | ferroptosis |
| AGPAT3 | ferroptosis |
| PEX12 | ferroptosis |
| CHP1 | ferroptosis |
| GPAT4 | ferroptosis |
| BRPF1 | ferroptosis |
| OSBPL9 | ferroptosis |
| INTS2 | ferroptosis |
| MMD | ferroptosis |
| CYP4F8 | ferroptosis |
| MLLT1 | ferroptosis |
| TTPA | ferroptosis |
| GRIA3 | ferroptosis |
| POM121L12 | ferroptosis |
| LIG3 | ferroptosis |
| AEBP2 | ferroptosis |
| AGPS | ferroptosis |
| CDCA3 | ferroptosis |
| PEX2 | ferroptosis |
| PEX6 | ferroptosis |
| TIMM9 | ferroptosis |
| DCAF7 | ferroptosis |
| LCE2C | ferroptosis |
| FAR1 | ferroptosis |
| PHF21A | ferroptosis |
| SMAD7 | ferroptosis |
| LYRM1 | ferroptosis |
| AMN | ferroptosis |
| PEX3 | ferroptosis |
| ACADSB | ferroptosis |
| PVT1 | ferroptosis |
| SLC39A14 | ferroptosis |
| MAP3K11 | ferroptosis |
| GSK3B | ferroptosis |
| BRD7 | ferroptosis |
| SLC25A28 | ferroptosis |
| SLC11A2 | ferroptosis |
| ZFAS1 | ferroptosis |
| TSC1 | ferroptosis |
| TGFB1 | ferroptosis |
| SNCA | ferroptosis |
| SIRT3 | ferroptosis |
| CGAS | ferroptosis |
| STING1 | ferroptosis |
| HDDC3 | ferroptosis |
| MIR761 | ferroptosis |
| MDM2 | ferroptosis |
| MDM4 | ferroptosis |
| MIR214 | ferroptosis |
| DLD | ferroptosis |
| WWTR1 | ferroptosis |
| PRKCA | ferroptosis |
| LGMN | ferroptosis |
| SMPD1 | ferroptosis |
| MYCN | ferroptosis |
| IFNA1 | ferroptosis |
| IFNA2 | ferroptosis |
| IFNA4 | ferroptosis |
| IFNA5 | ferroptosis |
| IFNA6 | ferroptosis |
| IFNA7 | ferroptosis |
| IFNA8 | ferroptosis |
| IFNA10 | ferroptosis |
| IFNA13 | ferroptosis |
| IFNA14 | ferroptosis |
| IFNA16 | ferroptosis |
| IFNA17 | ferroptosis |
| IFNA21 | ferroptosis |
| SMG9 | ferroptosis |
| PPARG | ferroptosis |
| MIR335 | ferroptosis |
| SNX5 | ferroptosis |
| PAQR3 | ferroptosis |
| MICU1 | ferroptosis |
| TOR2A | ferroptosis |
| MIR375 | ferroptosis |
| MAP3K14 | ferroptosis |
| MIR324 | ferroptosis |
| QSOX1 | ferroptosis |
| MIB2 | ferroptosis |
| CLTRN | ferroptosis |
| KLF2 | ferroptosis |
| HOTAIR | ferroptosis |
| H19 | ferroptosis |
| FOXO4 | ferroptosis |
| YTHDC2 | ferroptosis |
| DDR2 | ferroptosis |
| SLC39A7 | ferroptosis |
| TRIM46 | ferroptosis |
| ACSL1 | ferroptosis |
| KDM5A | ferroptosis |
| TRIM21 | ferroptosis |
| DPEP1 | ferroptosis |
| CYGB | ferroptosis |
| IDO1 | ferroptosis |
| GSTZ1 | ferroptosis |
| GJA1 | ferroptosis |
| SLC7A11 | ferroptosis |
| PGRMC1 | ferroptosis |
| CIRBP | ferroptosis |
| USP11 | ferroptosis |
| YAP1 | ferroptosis |
| MIR135B | ferroptosis |
| TRIM26 | ferroptosis |
| NDRG1 | ferroptosis |
| MIR302A | ferroptosis |
| ASMTL-AS1 | ferroptosis |
| FADS2 | ferroptosis |
| PIEZO1 | ferroptosis |
| LIFR | ferroptosis |
| PTPN6 | ferroptosis |
| MIR15A | ferroptosis |
| EGR1 | ferroptosis |
| ADAM23 | ferroptosis |
| ARHGEF26-AS1 | ferroptosis |
| CPEB1 | ferroptosis |
| COX4I2 | ferroptosis |
| TIMP1 | ferroptosis |
| KDM6B | ferroptosis |
| METTL14 | ferroptosis |
| MIB1 | ferroptosis |
| KDM5C | ferroptosis |
| MEG3 | ferroptosis |
| CCDC6 | ferroptosis |
| CFL1 | ferroptosis |
| MIR539 | ferroptosis |
| KMT2D | ferroptosis |
| PTGS2 | ferroptosis |
| FTH1 | ferroptosis |
| GPX4 | ferroptosis |
| HSPB1 | ferroptosis |
| NFE2L2 | ferroptosis |
| ACSL3 | ferroptosis |
| ACSL5 | ferroptosis |
| ACSL6 | ferroptosis |
| AIFM2 | ferroptosis |
| AKR1C1 | ferroptosis |
| AKR1C2 | ferroptosis |
| AKR1C3 | ferroptosis |
| CBS | ferroptosis |
| CHMP5 | ferroptosis |
| CHMP6 | ferroptosis |
| CISD1 | ferroptosis |
| COQ2 | ferroptosis |
| CTH | ferroptosis |
| FDFT1 | ferroptosis |
| FTL | ferroptosis |
| FTMT | ferroptosis |
| GCH1 | ferroptosis |
| GCLC | ferroptosis |
| GCLM | ferroptosis |
| GSS | ferroptosis |
| HMGCR | ferroptosis |
| MAP1LC3B | ferroptosis |
| MAP1LC3C | ferroptosis |
| PCBP1 | ferroptosis |
| PCBP2 | ferroptosis |
| PRNP | ferroptosis |
| SAT2 | ferroptosis |
| SLC39A8 | ferroptosis |
| SLC3A2 | ferroptosis |
| STEAP3 | ferroptosis |
| TXNRD1 | ferroptosis |
| VDAC3 | ferroptosis |
| ACACA | ferroptosis |
| CARS | ferroptosis |
| CRYAB | ferroptosis |
| FANCD2 | ferroptosis |
| HSBP1 | ferroptosis |
| MT1G | ferroptosis |
| NFS1 | ferroptosis |
| NRF2 | ferroptosis |
| OTUB1 | ferroptosis |
| PROM2 | ferroptosis |
| SQLE | ferroptosis |
| AMPK | entotic_cd |
| ATG5 | entotic_cd |
| ATG7 | entotic_cd |
| BECN1 | entotic_cd |
| CDC42 | entotic_cd |
| CDH1 | entotic_cd |
| CTNNA1 | entotic_cd |
| CYBB | entotic_cd |
| MYH14 | entotic_cd |
| PI3KC3 | entotic_cd |
| RHOA | entotic_cd |
| RNF146 | entotic_cd |
| ROCK | entotic_cd |
| RUBCN | entotic_cd |
| UVRAG | entotic_cd |
| SLC7A11 | disulfidptosis |
| NADPH | disulfidptosis |
| INF2 | disulfidptosis |
| CD2AP | disulfidptosis |
| PDLIM1 | disulfidptosis |
| ACTN4 | disulfidptosis |
| MYH9 | disulfidptosis |
| MYH10 | disulfidptosis |
| IQGAP1 | disulfidptosis |
| FLNA | disulfidptosis |
| FLNB | disulfidptosis |
| TLN1 | disulfidptosis |
| MYL6 | disulfidptosis |
| ACTB | disulfidptosis |
| DSTN | disulfidptosis |
| CAPZB | disulfidptosis |
| ABCB6 | cuproptosis |
| ANKRD9 | cuproptosis |
| APP | cuproptosis |
| ARF1 | cuproptosis |
| ATOX1 | cuproptosis |
| ATP7A | cuproptosis |
| ATP7B | cuproptosis |
| CCDC22 | cuproptosis |
| COX19 | cuproptosis |
| MT2A | cuproptosis |
| PRND | cuproptosis |
| PRNP | cuproptosis |
| SCO1 | cuproptosis |
| SCO2 | cuproptosis |
| SLC31A1 | cuproptosis |
| SLC31A2 | cuproptosis |
| AOC1 | cuproptosis |
| AQP1 | cuproptosis |
| AQP2 | cuproptosis |
| BACE1 | cuproptosis |
| BECN1 | cuproptosis |
| CYP1A1 | cuproptosis |
| DAXX | cuproptosis |
| HSF1 | cuproptosis |
| MAP1LC3A | cuproptosis |
| MT1A | cuproptosis |
| MT1B | cuproptosis |
| MT1DP | cuproptosis |
| MT1E | cuproptosis |
| MT1F | cuproptosis |
| MT1G | cuproptosis |
| MT1H | cuproptosis |
| MT1HL1 | cuproptosis |
| MT1M | cuproptosis |
| MT1X | cuproptosis |
| MT3 | cuproptosis |
| MT4 | cuproptosis |
| NFE2L2 | cuproptosis |
| SNCA | cuproptosis |
| COMMD1 | cuproptosis |
| CUTC | cuproptosis |
| XIAP | cuproptosis |
| STEAP2 | cuproptosis |
| STEAP3 | cuproptosis |
| STEAP4 | cuproptosis |
| SLC11A2 | cuproptosis |
| COX17 | cuproptosis |
| CP | cuproptosis |
| FKBP4 | cuproptosis |
| HEPH | cuproptosis |
| HEPHL1 | cuproptosis |
| MMGT1 | cuproptosis |
| PARK7 | cuproptosis |
| FADD | cuproptosis |
| FAS | cuproptosis |
| FASLG | cuproptosis |
| MLKL | cuproptosis |
| RIPK1 | cuproptosis |
| RIPK3 | cuproptosis |
| TLR3 | cuproptosis |
| TNF | cuproptosis |
| FDX1 | cuproptosis |
| LIAS | cuproptosis |
| LIPT1 | cuproptosis |
| DLD | cuproptosis |
| DLAT | cuproptosis |
| PDHA1 | cuproptosis |
| PDHB | cuproptosis |
| MTF1 | cuproptosis |
| GLS | cuproptosis |
| CDKN2A | cuproptosis |
| GCSH | cuproptosis |
| ABCA1 | autosis |
| ABL2 | autosis |
| ADAM10 | autosis |
| ADAM17 | autosis |
| AHI1 | autosis |
| AHR | autosis |
| AKR1C1 | autosis |
| ANXA1 | autosis |
| AP5Z1 | autosis |
| APC | autosis |
| APEX2 | autosis |
| APOL1 | autosis |
| APP | autosis |
| ARIH1 | autosis |
| ARPC1B | autosis |
| ATF2 | autosis |
| ATF4 | autosis |
| ATP12A | autosis |
| ATP1A3 | autosis |
| ATP4A | autosis |
| ATR | autosis |
| BCL2 | autosis |
| BCL2L1 | autosis |
| BCS1L | autosis |
| BDNF | autosis |
| BMP2 | autosis |
| BRAF | autosis |
| BRAP | autosis |
| BRD2 | autosis |
| BRD4 | autosis |
| CADM1 | autosis |
| CALD1 | autosis |
| CCL2 | autosis |
| CCN2 | autosis |
| CCR1 | autosis |
| CD40 | autosis |
| CD47 | autosis |
| CDC42 | autosis |
| CDK9 | autosis |
| CDKN3 | autosis |
| CENPJ | autosis |
| CHUK | autosis |
| CKLF | autosis |
| COL4A2 | autosis |
| COMT | autosis |
| CPE | autosis |
| CREB1 | autosis |
| CSF2 | autosis |
| CSNK2A1 | autosis |
| CSNK2A2 | autosis |
| CTNNB1 | autosis |
| CTSC | autosis |
| CTSL | autosis |
| CUX1 | autosis |
| CXCL2 | autosis |
| CXCL3 | autosis |
| CXCL8 | autosis |
| CYCS | autosis |
| DAAM1 | autosis |
| DDIT3 | autosis |
| DHODH | autosis |
| DNMT3B | autosis |
| DUSP5 | autosis |
| DYRK3 | autosis |
| EBP | autosis |
| EDN1 | autosis |
| EIF2AK3 | autosis |
| EPHA2 | autosis |
| ERBB2 | autosis |
| ERVW-1 | autosis |
| EZH2 | autosis |
| EZR | autosis |
| F2R | autosis |
| FAS | autosis |
| FASN | autosis |
| FASTK | autosis |
| FBN1 | autosis |
| FDXR | autosis |
| FGF2 | autosis |
| FN1 | autosis |
| FOS | autosis |
| GAK | autosis |
| GBP1 | autosis |
| GCLC | autosis |
| GDF15 | autosis |
| GLB1 | autosis |
| GNAS | autosis |
| GOLGB1 | autosis |
| GOLPH3 | autosis |
| GPNMB | autosis |
| GSK3B | autosis |
| GTF2B | autosis |
| H19 | autosis |
| HGF | autosis |
| HGFAC | autosis |
| HHEX | autosis |
| HLA-C | autosis |
| HLA-DPA1 | autosis |
| HLA-DQA1 | autosis |
| HMOX1 | autosis |
| HMOX2 | autosis |
| HNF1B | autosis |
| HNRNPC | autosis |
| HSP90AA1 | autosis |
| HSPB1 | autosis |
| HSPD1 | autosis |
| ICAM1 | autosis |
| IGF1R | autosis |
| IGFBP3 | autosis |
| IKBKG | autosis |
| IL15 | autosis |
| IL18 | autosis |
| IL1A | autosis |
| IL6 | autosis |
| IL6R | autosis |
| IL6ST | autosis |
| IL9 | autosis |
| IP6K1 | autosis |
| IP6K2 | autosis |
| IRF1 | autosis |
| IRF7 | autosis |
| IRF9 | autosis |
| ISG15 | autosis |
| ITGA5 | autosis |
| ITGAL | autosis |
| ITGB3 | autosis |
| IVD | autosis |
| IVNS1ABP | autosis |
| JAG1 | autosis |
| JUN | autosis |
| JUND | autosis |
| KDM5B | autosis |
| KITLG | autosis |
| LGALS3 | autosis |
| MAPK14 | autosis |
| MAPK8 | autosis |
| MARCKSL1 | autosis |
| MARK3 | autosis |
| MAT2A | autosis |
| MBTPS2 | autosis |
| MCAT | autosis |
| MCL1 | autosis |
| MKI67 | autosis |
| MLXIP | autosis |
| MMP1 | autosis |
| MTUS1 | autosis |
| NAAA | autosis |
| NAMPT | autosis |
| NDUFB7 | autosis |
| NEU1 | autosis |
| NFE2L2 | autosis |
| NFKB1 | autosis |
| NFKBIA | autosis |
| NGF | autosis |
| NLRP3 | autosis |
| NPC1 | autosis |
| NR5A1 | autosis |
| NXF1 | autosis |
| OASL | autosis |
| OSBP | autosis |
| OSTF1 | autosis |
| PAFAH1B1 | autosis |
| PAGR1 | autosis |
| PDE4DIP | autosis |
| PDGFB | autosis |
| PFKFB3 | autosis |
| PGF | autosis |
| PHB | autosis |
| PIGF | autosis |
| PIK3CA | autosis |
| PITX1 | autosis |
| PLA2G15 | autosis |
| PLA2G4A | autosis |
| PLAU | autosis |
| PLEKHM1 | autosis |
| PLIN2 | autosis |
| PLK3 | autosis |
| PLXNA2 | autosis |
| PMAIP1 | autosis |
| PMP22 | autosis |
| POLD1 | autosis |
| PPARG | autosis |
| PPP1CA | autosis |
| PSEN1 | autosis |
| PSME3 | autosis |
| PSPH | autosis |
| PTGS1 | autosis |
| PTGS2 | autosis |
| PYCARD | autosis |
| RAB40B | autosis |
| RAB9A | autosis |
| RB1 | autosis |
| REL | autosis |
| RELA | autosis |
| RELB | autosis |
| RHOD | autosis |
| RIPK1 | autosis |
| RIT1 | autosis |
| RNASE1 | autosis |
| RNMT | autosis |
| RRAD | autosis |
| RRM2 | autosis |
| RSAD2 | autosis |
| RTN2 | autosis |
| S100A1 | autosis |
| SAT1 | autosis |
| SDC2 | autosis |
| SERPINE1 | autosis |
| SERPINH1 | autosis |
| SETD2 | autosis |
| SGPL1 | autosis |
| SIK1 | autosis |
| SIM2 | autosis |
| SIRT1 | autosis |
| SIRT7 | autosis |
| SLC25A20 | autosis |
| SLC33A1 | autosis |
| SLC38A7 | autosis |
| SLC3A2 | autosis |
| SLC6A8 | autosis |
| SMOX | autosis |
| SNRPE | autosis |
| SOCS1 | autosis |
| SOD1 | autosis |
| SOD2 | autosis |
| SOS1 | autosis |
| SOX9 | autosis |
| SPAG9 | autosis |
| SRF | autosis |
| ST3GAL4 | autosis |
| SYK | autosis |
| TANC2 | autosis |
| TBCA | autosis |
| TFDP2 | autosis |
| TFPI | autosis |
| THBD | autosis |
| TJP1 | autosis |
| TLE1 | autosis |
| TLE4 | autosis |
| TLR2 | autosis |
| TLR4 | autosis |
| TNF | autosis |
| TNFRSF1A | autosis |
| TP53 | autosis |
| TRIB3 | autosis |
| TSPO | autosis |
| TXNRD1 | autosis |
| UGCG | autosis |
| UNG | autosis |
| USP13 | autosis |
| USP18 | autosis |
| UTP25 | autosis |
| VCAM1 | autosis |
| VEGFA | autosis |
| VIM | autosis |
| WNT5A | autosis |
| ZC3HAV1 | autosis |
| SPRY2 | autosis |
| MYC | autosis |
| CDKN1C | autosis |
| DAXX | autosis |
| INSR | autosis |
| FGFR4 | autosis |
| HSF1 | autosis |
| PAX8 | autosis |
| TSC1 | autosis |
| CCND1 | autosis |
| MCM2 | autosis |
| RASSF1 | autosis |
| MCM7 | autosis |
| RNH1 | autosis |
| PRDX2 | autosis |
| FOXL2 | autosis |
| NCOA1 | autosis |
| AURKA | autosis |
| BIRC5 | autosis |
| HRAS | autosis |
| HMGA1 | autosis |
| BARD1 | autosis |
| INHBA | autosis |
| MDH2 | autosis |
| CDC20 | autosis |
| CHEK1 | autosis |
| MCM10 | autosis |
| PLK1 | autosis |
| CCNE1 | autosis |
| CREBBP | autosis |
| CYP1B1 | autosis |
| DAPK1 | autosis |
| EIF4E | autosis |
| EIF5A2 | autosis |
| FGFR1 | autosis |
| GABPA | autosis |
| HDAC1 | autosis |
| HDAC5 | autosis |
| HSPA2 | autosis |
| IMP3 | autosis |
| KDM6A | autosis |
| NCOA3 | autosis |
| NOTCH1 | autosis |
| PPL | autosis |
| RSF1 | autosis |
| SKP2 | autosis |
| STAG2 | autosis |
| TGFB2 | autosis |
| BAX | autosis |
| CDKN1A | autosis |
| ANXA10 | autosis |
| ARHGEF7 | autosis |
| ATP7A | autosis |
| CDC42EP3 | autosis |
| CEBPD | autosis |
| DDR2 | autosis |
| DUSP1 | autosis |
| ELK1 | autosis |
| GEM | autosis |
| GPX2 | autosis |
| GSTP1 | autosis |
| HSPA1B | autosis |
| IGFBP5 | autosis |
| MLH1 | autosis |
| MXI1 | autosis |
| NFATC1 | autosis |
| PSG2 | autosis |
| RORA | autosis |
| SYP | autosis |
| TGFBI | autosis |
| THBS1 | autosis |
| TIMM8A | autosis |
| TMX1 | autosis |
| TSC2 | autosis |
| TUG1 | autosis |
| UBQLN2 | autosis |
| FUT4 | autosis |
| ZHX2 | autosis |
| GALNT14 | autosis |
| PPARD | autosis |
| PSMB9 | autosis |
| MAP3K1 | autosis |
| NQO1 | autosis |
| ACTB | autosis |
| BNIP3 | autosis |
| CORO1A | autosis |
| EGR1 | autosis |
| FABP4 | autosis |
| ID3 | autosis |
| MAP1LC3B | autosis |
| SPARC | autosis |
| TGFBR2 | autosis |
| TSC22D1 | autosis |
| NRAS | autosis |
| UCP2 | autosis |
| CDK2 | autosis |
| PLK2 | autosis |
| ATP7B | autosis |
| CASK | autosis |
| DBI | autosis |
| EFEMP1 | autosis |
| SPINT2 | autosis |
| IGFBP2 | autosis |
| NR2C2 | autosis |
| ANTXR1 | autosis |
| ATF3 | autosis |
| CCN1 | autosis |
| DFFB | autosis |
| FGF13 | autosis |
| NF2 | autosis |
| ATF7IP | autosis |
| ERCC4 | autosis |
| PSMD12 | autosis |
| HPGD | autosis |
| CDK1 | autosis |
| E2F1 | autosis |
| FBXO5 | autosis |
| GMNN | autosis |
| KIF15 | autosis |
| KIFC1 | autosis |
| LRP8 | autosis |
| NEK2 | autosis |
| TOP2A | autosis |
| ADRB2 | autosis |
| AHSA1 | autosis |
| BCL2A1 | autosis |
| BHLHE40 | autosis |
| BRCC3 | autosis |
| BRIP1 | autosis |
| CCND2 | autosis |
| CCNG2 | autosis |
| CDCA4 | autosis |
| CDCA7 | autosis |
| CDK8 | autosis |
| DKK1 | autosis |
| EGLN2 | autosis |
| EP300 | autosis |
| ETS1 | autosis |
| F2RL1 | autosis |
| FA2H | autosis |
| FANCA | autosis |
| FANCF | autosis |
| FGFBP1 | autosis |
| FHOD1 | autosis |
| GCLM | autosis |
| GINS2 | autosis |
| GTF2H1 | autosis |
| HBEGF | autosis |
| HES1 | autosis |
| HSPA4 | autosis |
| HYAL2 | autosis |
| ITGB4 | autosis |
| JMJD6 | autosis |
| KDM2A | autosis |
| KIN | autosis |
| KLF5 | autosis |
| MYCBP | autosis |
| PDCD4 | autosis |
| PIM1 | autosis |
| PIMREG | autosis |
| PKD1 | autosis |
| POR | autosis |
| RAB27A | autosis |
| RAB7A | autosis |
| RFC3 | autosis |
| RIPK2 | autosis |
| RPA1 | autosis |
| RSRC2 | autosis |
| SFPQ | autosis |
| SLC2A3 | autosis |
| SLC7A11 | autosis |
| SLFN12 | autosis |
| SMAD4 | autosis |
| TARDBP | autosis |
| TCF3 | autosis |
| TNFRSF11B | autosis |
| TUSC2 | autosis |
| TXNRD2 | autosis |
| ZEB2 | autosis |
| MAPK7 | autosis |
| BAG3 | autosis |
| CEBPB | autosis |
| DHRS3 | autosis |
| ERO1A | autosis |
| SMARCD3 | autosis |
| BAD | autosis |
| BAK1 | autosis |
| XIAP | autosis |
| SRC | autosis |
| CDC25C | autosis |
| GADD45A | autosis |
| ACVR1 | autosis |
| ACVR1B | autosis |
| ADAM12 | autosis |
| AKR1C3 | autosis |
| ARHGEF2 | autosis |
| BNIP3L | autosis |
| CDC7 | autosis |
| CDH11 | autosis |
| CDH2 | autosis |
| CDK19 | autosis |
| CDKN2B | autosis |
| CLK1 | autosis |
| CLU | autosis |
| CTNND1 | autosis |
| CYP24A1 | autosis |
| DCTN4 | autosis |
| DOK1 | autosis |
| EFNA4 | autosis |
| ERBB4 | autosis |
| EREG | autosis |
| F11R | autosis |
| FKBP4 | autosis |
| FTH1 | autosis |
| FZD1 | autosis |
| FZD7 | autosis |
| GABARAPL1 | autosis |
| GFPT1 | autosis |
| GGCX | autosis |
| GPR161 | autosis |
| H2AX | autosis |
| IGF2BP3 | autosis |
| ILRUN | autosis |
| ITCH | autosis |
| ITGA6 | autosis |
| ITGB5 | autosis |
| JPT2 | autosis |
| KCNH4 | autosis |
| KHDRBS1 | autosis |
| KLF4 | autosis |
| LONP1 | autosis |
| LOXL2 | autosis |
| LRP6 | autosis |
| MAP2K5 | autosis |
| MAP3K2 | autosis |
| MMAB | autosis |
| MMP11 | autosis |
| MTMR3 | autosis |
| MYLK | autosis |
| NEDD4L | autosis |
| NRF1 | autosis |
| PLCD1 | autosis |
| PLXNA1 | autosis |
| PRKD2 | autosis |
| RAB5A | autosis |
| RAB6A | autosis |
| RAC1 | autosis |
| RARB | autosis |
| RASAL2 | autosis |
| ROR1 | autosis |
| SERPINB2 | autosis |
| SLC4A7 | autosis |
| SMURF2 | autosis |
| SQSTM1 | autosis |
| SRGN | autosis |
| ST3GAL6 | autosis |
| TACSTD2 | autosis |
| TFPI2 | autosis |
| TMSB15B | autosis |
| TNS3 | autosis |
| TRIM13 | autosis |
| TXNIP | autosis |
| UBE2B | autosis |
| UBR7 | autosis |
| ULK1 | autosis |
| UTRN | autosis |
| WWC1 | autosis |
| XBP1 | autosis |
| ZFX | autosis |
| BUB1 | autosis |
| UBE2C | autosis |
| CCND3 | autosis |
| DDIT4 | autosis |
| MCM5 | autosis |
| ZNF165 | autosis |
| MMP13 | autosis |
| FLOT1 | autosis |
| NNMT | autosis |
| NR2F1 | autosis |
| PLAGL2 | autosis |
| SMAD1 | autosis |
| BLCAP | autosis |
| ENDOG | autosis |
| MAU2 | autosis |
| IER3 | autosis |
| CTTN | autosis |
| DAG1 | autosis |
| TSPAN31 | autosis |
| CDKN2C | autosis |
| LOXL1 | autosis |
| AURKB | autosis |
| BMP4 | autosis |
| CDK5 | autosis |
| HSF2 | autosis |
| ID1 | autosis |
| LOX | autosis |
| NDRG1 | autosis |
| NRG1 | autosis |
| PJA2 | autosis |
| RCAN1 | autosis |
| RRS1 | autosis |
| SCG5 | autosis |
| SLC7A5 | autosis |
| STK3 | autosis |
| TPR | autosis |
| ZNF395 | autosis |
| PRKCD | autosis |
| HOPX | autosis |
| FUCA1 | autosis |
| AKAP9 | autosis |
| ATF1 | autosis |
| BMP1 | autosis |
| BTG1 | autosis |
| CITED2 | autosis |
| CTDSPL | autosis |
| ERCC5 | autosis |
| FYN | autosis |
| GDNF | autosis |
| GOLGA5 | autosis |
| IGFBP1 | autosis |
| IL13RA2 | autosis |
| INSL3 | autosis |
| IRS1 | autosis |
| MLF1 | autosis |
| MREG | autosis |
| NFIL3 | autosis |
| PLA2R1 | autosis |
| PPP1R15A | autosis |
| RAC2 | autosis |
| RGS4 | autosis |
| RXRB | autosis |
| SMURF1 | autosis |
| STK17B | autosis |
| TCF7L1 | autosis |
| TMSB10 | autosis |
| TSG101 | autosis |
| UPP1 | autosis |
| VCAN | autosis |
| WRN | autosis |
| TICAM1 | autosis |
| GTF2IRD1 | autosis |
| CFLAR | autosis |
| SORBS1 | autosis |
| RAD51C | autosis |
| TRAF2 | autosis |
| ARF3 | autosis |
| HSPA4L | autosis |
| RESF1 | autosis |
| STK10 | autosis |
| CTCF | autosis |
| HOXA1 | autosis |
| LANCL1 | autosis |
| SPTLC2 | autosis |
| CDKN2D | autosis |
| PKNOX1 | autosis |
| PTHLH | autosis |
| DYNLL1 | autosis |
| CCNA2 | autosis |
| CDC6 | autosis |
| CDCA3 | autosis |
| GINS4 | autosis |
| HELLS | autosis |
| KIF20A | autosis |
| MYBL2 | autosis |
| PAQR4 | autosis |
| RPA3 | autosis |
| SLC38A1 | autosis |
| TRIM25 | autosis |
| ADCY3 | autosis |
| AMD1 | autosis |
| APBA2 | autosis |
| CARD10 | autosis |
| CD55 | autosis |
| CDK10 | autosis |
| CTNNA1 | autosis |
| DCP1A | autosis |
| DLGAP4 | autosis |
| EBAG9 | autosis |
| EHMT2 | autosis |
| ETS2 | autosis |
| FBXO31 | autosis |
| GOLGA2 | autosis |
| GPAA1 | autosis |
| GSE1 | autosis |
| HNRNPA2B1 | autosis |
| HOXA10 | autosis |
| HOXA9 | autosis |
| HSPH1 | autosis |
| IL11 | autosis |
| IL24 | autosis |
| KANK1 | autosis |
| KANK2 | autosis |
| KDM4A | autosis |
| KDM4B | autosis |
| KDM6B | autosis |
| KLF12 | autosis |
| KLF9 | autosis |
| MECP2 | autosis |
| MEF2D | autosis |
| MSX1 | autosis |
| NASP | autosis |
| NUDT1 | autosis |
| PDCD5 | autosis |
| PDYN | autosis |
| PER2 | autosis |
| PHLDA1 | autosis |
| POU2F1 | autosis |
| PTBP3 | autosis |
| RHBDF1 | autosis |
| RPS6KB2 | autosis |
| SIX1 | autosis |
| SLC26A2 | autosis |
| SOX7 | autosis |
| SRSF7 | autosis |
| SUB1 | autosis |
| SYF2 | autosis |
| TAGLN | autosis |
| TCEA1 | autosis |
| TERF1 | autosis |
| TGIF2 | autosis |
| TM7SF2 | autosis |
| TOB1 | autosis |
| TP53BP2 | autosis |
| TRIM16 | autosis |
| TTC33 | autosis |
| VANGL1 | autosis |
| ZFP36 | autosis |
| ADORA1 | autosis |
| HCRT | autosis |
| RGS2 | autosis |
| CLDN11 | autosis |
| HMBOX1 | autosis |
| ITGB6 | autosis |
| RNF6 | autosis |
| SOCS4 | autosis |
| COL4A1 | autosis |
| CLTB | autosis |
| IKBKB | autosis |
| TRAF6 | autosis |
| ABI1 | autosis |
| ADAMTS5 | autosis |
| ADH7 | autosis |
| AKAP12 | autosis |
| AREG | autosis |
| ARHGDIB | autosis |
| ASS1 | autosis |
| ATP4B | autosis |
| AXIN1 | autosis |
| CAPN2 | autosis |
| CCN3 | autosis |
| CCNJ | autosis |
| CDH3 | autosis |
| CELF1 | autosis |
| CLCN3 | autosis |
| CNN2 | autosis |
| CPT1A | autosis |
| CREBZF | autosis |
| CXXC1 | autosis |
| DCTPP1 | autosis |
| DHRS11 | autosis |
| DLEU1 | autosis |
| EFNB1 | autosis |
| EIF3A | autosis |
| EIF6 | autosis |
| ELK4 | autosis |
| EXO1 | autosis |
| FKTN | autosis |
| GALNT2 | autosis |
| GALNT6 | autosis |
| GAREM1 | autosis |
| GPI | autosis |
| GPRC5A | autosis |
| HINT1 | autosis |
| HK2 | autosis |
| HOXB7 | autosis |
| HSP90AB1 | autosis |
| HSPA13 | autosis |
| ITGA2 | autosis |
| JRK | autosis |
| KDM3A | autosis |
| KIF2A | autosis |
| KLF11 | autosis |
| KLF6 | autosis |
| KMT2B | autosis |
| KMT2D | autosis |
| LAMTOR3 | autosis |
| LEF1 | autosis |
| LIF | autosis |
| LTA | autosis |
| LYN | autosis |
| MAP3K5 | autosis |
| MELTF | autosis |
| MMP10 | autosis |
| MPC1 | autosis |
| NCF2 | autosis |
| NME2 | autosis |
| NTHL1 | autosis |
| PAIP1 | autosis |
| PCDH7 | autosis |
| PDLIM5 | autosis |
| PGAP3 | autosis |
| PON2 | autosis |
| PRSS23 | autosis |
| PTX3 | autosis |
| RAB22A | autosis |
| RABEP1 | autosis |
| RABGEF1 | autosis |
| RELN | autosis |
| RHOB | autosis |
| RPL10 | autosis |
| SGCB | autosis |
| SLC16A7 | autosis |
| SLC6A6 | autosis |
| SOCS6 | autosis |
| SPPL2A | autosis |
| STAT6 | autosis |
| STC2 | autosis |
| STK24 | autosis |
| STX1A | autosis |
| TBL1X | autosis |
| TCF7L2 | autosis |
| TGM2 | autosis |
| TRIM14 | autosis |
| TRIM23 | autosis |
| TRIM36 | autosis |
| TSPAN1 | autosis |
| UBR2 | autosis |
| UFM1 | autosis |
| VCL | autosis |
| XPA | autosis |
| YBX3 | autosis |
| ZBTB4 | autosis |
| ZFP36L2 | autosis |
| ZNF143 | autosis |
| TUBA1B | autosis |
| ARAP2 | autosis |
| EIF3L | autosis |
| CHKA | autosis |
| ELP5 | autosis |
| MAP2K4 | autosis |
| CDC25A | autosis |
| HIPK3 | autosis |
| NLK | autosis |
| PGRMC2 | autosis |
| BRF2 | autosis |
| ACVR2A | autosis |
| MFHAS1 | autosis |
| FOSL2 | autosis |
| LSS | autosis |
| SNIP1 | autosis |
| ITGA7 | autosis |
| CDC45 | autosis |
| CSDE1 | autosis |
| PGPEP1 | autosis |
| ING1 | autosis |
| ATP2A2 | autosis |
| CCNA1 | autosis |
| CCNL1 | autosis |
| FANCL | autosis |
| FXR1 | autosis |
| GCC1 | autosis |
| HCFC1R1 | autosis |
| HEY1 | autosis |
| IFI16 | autosis |
| NAB2 | autosis |
| NIPBL | autosis |
| PER1 | autosis |
| PER3 | autosis |
| RAD17 | autosis |
| SLC17A5 | autosis |
| TRIM33 | autosis |
| NMU | autosis |
| DST | autosis |
| SELENBP1 | autosis |
| RBL2 | autosis |
| ABCC5 | autosis |
| AFF4 | autosis |
| ATP2A3 | autosis |
| ATP5MC1 | autosis |
| CHAC1 | autosis |
| CUL3 | autosis |
| FJX1 | autosis |
| FTL | autosis |
| GNA13 | autosis |
| LDOC1 | autosis |
| NCOR2 | autosis |
| NFYA | autosis |
| PRDX4 | autosis |
| SHMT1 | autosis |
| SLC38A2 | autosis |
| COL17A1 | autosis |
| GEMIN4 | autosis |
| RMDN3 | autosis |
| IRF4 | autosis |
| MAP3K9 | autosis |
| PCSK6 | autosis |
| ZMIZ1 | autosis |
| NID1 | autosis |
| P4HA2 | autosis |
| PGRMC1 | autosis |
| EML4 | autosis |
| MIA2 | autosis |
| PIK3R2 | autosis |
| SPC25 | autosis |
| LIPA | autosis |
| BTN3A3 | autosis |
| LCK | autosis |
| MAP4K3 | autosis |
| MRTFA | autosis |
| NFIX | autosis |
| RFC4 | autosis |
| MCM4 | autosis |
| IST1 | autosis |
| KLF10 | autosis |
| RFC2 | autosis |
| SPSB3 | autosis |
| TPM4 | autosis |
| PTP4A1 | autosis |
| RND3 | autosis |
| AADAC | autosis |
| ACP6 | autosis |
| ATP1A1 | autosis |
| ATP1B2 | autosis |
| BTF3P11 | autosis |
| CAPNS1 | autosis |
| CAV2 | autosis |
| CDKL3 | autosis |
| CDR2 | autosis |
| CNPY2 | autosis |
| DEPTOR | autosis |
| DNAJB6 | autosis |
| HOOK2 | autosis |
| IL3 | autosis |
| MYL9 | autosis |
| NUMB | autosis |
| POLM | autosis |
| PTRH2 | autosis |
| RHOF | autosis |
| RRAS2 | autosis |
| SYNJ2BP | autosis |
| THUMPD2 | autosis |
| TSPAN4 | autosis |
| TTC17 | autosis |
| ZC3H12A | autosis |
| ZFHX4 | autosis |
| ANP32A | autosis |
| GLRX | autosis |
| HSPE1 | autosis |
| LYPD3 | autosis |
| MCM3 | autosis |
| N4BP2L1 | autosis |
| SENP5 | autosis |
| SZRD1 | autosis |
| TNFSF9 | autosis |
| WDR77 | autosis |
| HRH1 | autosis |
| RPS6KA5 | autosis |
| SLC6A4 | autosis |
| ARHGDIA | autosis |
| ATRN | autosis |
| FERMT1 | autosis |
| GRB10 | autosis |
| ICAM3 | autosis |
| IRS2 | autosis |
| LRIG2 | autosis |
| MLLT11 | autosis |
| MT1X | autosis |
| PGP | autosis |
| PMS1 | autosis |
| PUDP | autosis |
| RALGDS | autosis |
| RGL1 | autosis |
| SBNO1 | autosis |
| SKIL | autosis |
| SLK | autosis |
| SOS2 | autosis |
| SP2 | autosis |
| TRIB1 | autosis |
| VOPP1 | autosis |
| XBP1P1 | autosis |
| UBE2D1 | autosis |
| SMTN | autosis |
| CDYL | autosis |
| EZH1 | autosis |
| NUDT6 | autosis |
| PNN | autosis |
| RLF | autosis |
| TTBK2 | autosis |
| NMB | autosis |
| RAB38 | autosis |
| ATP1A2 | autosis |
| BTN3A1 | autosis |
| GABBR1 | autosis |
| PPP3CA | autosis |
| RALGAPB | autosis |
| SLCO4A1 | autosis |
| TCEAL9 | autosis |
| TMEM14A | autosis |
| CASP2 | autosis |
| CUL7 | autosis |
| NAV3 | autosis |
| M6PR | autosis |
| CRADD | autosis |
| FPGT | autosis |
| LARP6 | autosis |
| CBFA2T2 | autosis |
| COPS7B | autosis |
| JADE1 | autosis |
| MAP1S | autosis |
| MT1H | autosis |
| MTHFD2 | autosis |
| NCOA6 | autosis |
| RTL10 | autosis |
| SLC25A11 | autosis |
| WTAP | autosis |
| RBM38 | autosis |
| ACD | autosis |
| ATP1B1 | autosis |
| CDH15 | autosis |
| COL3A1 | autosis |
| DNAJB1 | autosis |
| GNAI1 | autosis |
| HILPDA | autosis |
| ITGB8 | autosis |
| MBNL2 | autosis |
| MCM6 | autosis |
| OPTN | autosis |
| PDE10A | autosis |
| PDZD2 | autosis |
| USP1 | autosis |
| NR1D2 | autosis |
| OSGIN1 | autosis |
| CALU | autosis |
| PARP2 | autosis |
| EIF1 | autosis |
| EIF5 | autosis |
| LYPD1 | autosis |
| FAM8A1 | autosis |
| DTYMK | autosis |
| HJURP | autosis |
| LMNB1 | autosis |
| ALDH1B1 | autosis |
| APPBP2 | autosis |
| ARFGAP3 | autosis |
| ARL8B | autosis |
| ATRIP | autosis |
| BAG5 | autosis |
| BAZ2A | autosis |
| CCNK | autosis |
| CD302 | autosis |
| CRIM1 | autosis |
| CTH | autosis |
| ELL | autosis |
| HBP1 | autosis |
| HIVEP1 | autosis |
| IKZF5 | autosis |
| LBH | autosis |
| LCOR | autosis |
| MCCC2 | autosis |
| OAZ1 | autosis |
| PPP1R8 | autosis |
| PPP2R2A | autosis |
| PSG1 | autosis |
| PTPRN2 | autosis |
| RAD9A | autosis |
| RB1CC1 | autosis |
| RBM25 | autosis |
| SCAND1 | autosis |
| TTLL12 | autosis |
| WDR19 | autosis |
| YWHAH | autosis |
| ZBTB18 | autosis |
| ZYX | autosis |
| GNB2 | autosis |
| B3GNT2 | autosis |
| GGPS1 | autosis |
| SLC18A2 | autosis |
| TRIAP1 | autosis |
| ABHD5 | autosis |
| ARID4B | autosis |
| ATP10A | autosis |
| BACH1 | autosis |
| BAZ2B | autosis |
| DEPDC1B | autosis |
| DUSP10 | autosis |
| EFEMP2 | autosis |
| ELF1 | autosis |
| ENDOD1 | autosis |
| ETV3 | autosis |
| FECH | autosis |
| FOXD1 | autosis |
| FRS2 | autosis |
| GCHFR | autosis |
| GLIPR1 | autosis |
| GOLPH3L | autosis |
| HAUS6 | autosis |
| HERPUD1 | autosis |
| HEXIM1 | autosis |
| HSPA6 | autosis |
| HSPBAP1 | autosis |
| IFIT5 | autosis |
| JMJD1C | autosis |
| KCNA5 | autosis |
| KPNB1 | autosis |
| LCP1 | autosis |
| MCM8 | autosis |
| MEIS2 | autosis |
| MLPH | autosis |
| NCOR1 | autosis |
| NT5C3A | autosis |
| PLEKHF1 | autosis |
| POP5 | autosis |
| PRG2 | autosis |
| PSG7 | autosis |
| PXMP4 | autosis |
| QSOX1 | autosis |
| RGS17 | autosis |
| RIDA | autosis |
| SENP6 | autosis |
| SERPINA2 | autosis |
| SETD5 | autosis |
| SLC1A4 | autosis |
| SLC30A1 | autosis |
| STXBP3 | autosis |
| SWAP70 | autosis |
| TMF1 | autosis |
| TOPORS | autosis |
| TSPYL2 | autosis |
| WDR48 | autosis |
| SLC25A15 | autosis |
| FOXJ3 | autosis |
| CBLL1 | autosis |
| WSB1 | autosis |
| NEIL3 | autosis |
| CBLB | autosis |
| OGA | autosis |
| AHNAK2 | autosis |
| CLIP2 | autosis |
| CSNK1G2 | autosis |
| HMBS | autosis |
| HUS1 | autosis |
| MTF1 | autosis |
| BEX3 | autosis |
| CTNNBIP1 | autosis |
| MAP3K14 | autosis |
| SERP1 | autosis |
| CCDC68 | autosis |
| MAP4K5 | autosis |
| TTLL4 | autosis |
| PALLD | autosis |
| DNA2 | autosis |
| CTPS1 | autosis |
| ICMT | autosis |
| PIAS4 | autosis |
| SLC25A36 | autosis |
| TNFAIP1 | autosis |
| RABIF | autosis |
| AGPAT1 | autosis |
| CNKSR1 | autosis |
| ISOC1 | autosis |
| MEF2A | autosis |
| MTPAP | autosis |
| NFAT5 | autosis |
| PIP4K2B | autosis |
| PPIF | autosis |
| PSRC1 | autosis |
| RCBTB1 | autosis |
| SNX6 | autosis |
| RPS6KC1 | autosis |
| BDH2 | autosis |
| SLC31A2 | autosis |
| PHF1 | autosis |
| PPAN | autosis |
| WDFY3 | autosis |
| ADO | autosis |
| CENPI | autosis |
| ERLIN2 | autosis |
| WDR7 | autosis |
| TADA3 | autosis |
| ZNF365 | autosis |
| CCNT1 | autosis |
| DHFR | autosis |
| POLA2 | autosis |
| CCDC85B | autosis |
| DOK4 | autosis |
| LMNB2 | autosis |
| LSM2 | autosis |
| PUM1 | autosis |
| RBM39 | autosis |
| RBM8A | autosis |
| RPL13A | autosis |
| RYBP | autosis |
| SIK3 | autosis |
| TUBB | autosis |
| TUBB2A | autosis |
| DNAJB4 | autosis |
| AMPH | autosis |
| ARMCX3 | autosis |
| ATP2C1 | autosis |
| ATP8A1 | autosis |
| AZI2 | autosis |
| DMTF1 | autosis |
| DUT | autosis |
| FAM13A | autosis |
| GMEB1 | autosis |
| GSTT2 | autosis |
| HERC4 | autosis |
| LZTS3 | autosis |
| MAP2K3 | autosis |
| MKNK2 | autosis |
| NR2F6 | autosis |
| PARD6A | autosis |
| PKP4 | autosis |
| POGLUT1 | autosis |
| PRMT7 | autosis |
| RNF38 | autosis |
| SERINC1 | autosis |
| SHTN1 | autosis |
| TRMO | autosis |
| YPEL5 | autosis |
| ATP1A4 | autosis |
| ALDH5A1 | autosis |
| LARP4 | autosis |
| SSX2IP | autosis |
| ATG14 | autosis |
| ELOF1 | autosis |
| MAP2K6 | autosis |
| MORC3 | autosis |
| TXN2 | autosis |
| UBAP1 | autosis |
| GALNT10 | autosis |
| PRDM4 | autosis |
| ZNF22 | autosis |
| PMPCA | autosis |
| B4GAT1 | autosis |
| ITSN2 | autosis |
| TANK | autosis |
| AMOTL2 | autosis |
| ATXN3 | autosis |
| CAMTA2 | autosis |
| CCNL2 | autosis |
| CNNM4 | autosis |
| FEM1B | autosis |
| IPP | autosis |
| MED13L | autosis |
| NAA40 | autosis |
| SRSF11 | autosis |
| AMPD3 | autosis |
| ATP2B4 | autosis |
| CYB5A | autosis |
| MALL | autosis |
| MBP | autosis |
| MRPL36 | autosis |
| MTM1 | autosis |
| NAV2 | autosis |
| NHLRC2 | autosis |
| NME7 | autosis |
| ORC6 | autosis |
| PCNX1 | autosis |
| PPOX | autosis |
| RAD54B | autosis |
| SAC3D1 | autosis |
| THAP11 | autosis |
| ZNF277 | autosis |
| ZNF91 | autosis |
| GATC | autosis |
| SMC5 | autosis |
| ATP8A2 | autosis |
| CHTOP | autosis |
| LRRC8E | autosis |
| NDUFS6 | autosis |
| PSMB10 | autosis |
| SNAP23 | autosis |
| TIPARP | autosis |
| ZNF84 | autosis |
| CCNF | autosis |
| KIF18B | autosis |
| ARPP19 | autosis |
| BRD1 | autosis |
| CNOT4 | autosis |
| CYTH2 | autosis |
| DARS2 | autosis |
| FBXL18 | autosis |
| MRPL24 | autosis |
| MRPS11 | autosis |
| NFE2L1 | autosis |
| PI4K2A | autosis |
| PIGK | autosis |
| PLXNA3 | autosis |
| PPP2R2D | autosis |
| PSG4 | autosis |
| RPL7A | autosis |
| RSL1D1 | autosis |
| SLC25A12 | autosis |
| TAF9 | autosis |
| TASP1 | autosis |
| TMED5 | autosis |
| TRADD | autosis |
| WDR76 | autosis |
| ZNF24 | autosis |
| SH2D4A | autosis |
| TPP1 | autosis |
| CLDN14 | autosis |
| DEAF1 | autosis |
| DSE | autosis |
| EHD3 | autosis |
| ELOVL6 | autosis |
| ENC1 | autosis |
| GLRX5 | autosis |
| GNAI3 | autosis |
| GON4L | autosis |
| HECA | autosis |
| LCAT | autosis |
| MAFF | autosis |
| MAFG | autosis |
| N4BP2L2 | autosis |
| ORC1 | autosis |
| PNRC1 | autosis |
| PPM1F | autosis |
| PPP1R3C | autosis |
| PSG9 | autosis |
| PTPN18 | autosis |
| SLC37A4 | autosis |
| SLC39A14 | autosis |
| SOAT2 | autosis |
| STAM | autosis |
| TOB2 | autosis |
| TP53I11 | autosis |
| TREX1 | autosis |
| UAP1L1 | autosis |
| UBE2A | autosis |
| UBE2H | autosis |
| WIPF2 | autosis |
| GPR107 | autosis |
| AKAP17A | autosis |
| B3GAT3 | autosis |
| ENSA | autosis |
| ATP8B1 | autosis |
| GJC1 | autosis |
| ATP6V1C1 | autosis |
| TRAM2 | autosis |
| ADAMTS3 | autosis |
| CBY1 | autosis |
| PWWP3A | autosis |
| ATP2B1 | autosis |
| IL13RA1 | autosis |
| ARID3B | autosis |
| ATP2B2 | autosis |
| UGDH | autosis |
| SETMAR | autosis |
| ATP5ME | autosis |
| RPA2 | autosis |
| DDAH2 | autosis |
| N6AMT1 | autosis |
| SLC5A6 | autosis |
| GMPR2 | autosis |
| PLPP1 | autosis |
| POLR3K | autosis |
| DHX8 | autosis |
| COA1 | autosis |
| PORCN | autosis |
| ZNF354A | autosis |
| FAM102A | autosis |
| INHBB | autosis |
| ACSL5 | autosis |
| RNASET2 | autosis |
| VAT1 | autosis |
| ZFP36L1 | autosis |
| ERMP1 | autosis |
| CGRRF1 | autosis |
| TOX4 | autosis |
| ZKSCAN5 | autosis |
| ZNF202 | autosis |
| ANKRD12 | autosis |
| ELOA | autosis |
| ORC2 | autosis |
| ARL5A | autosis |
| COPS2 | autosis |
| DNAJA1 | autosis |
| EXOSC4 | autosis |
| HOXD1 | autosis |
| KLF3 | autosis |
| PTBP2 | autosis |
| SEPHS1 | autosis |
| ZSCAN5A | autosis |
| NME3 | autosis |
| WAC | autosis |
| ADCY8 | autosis |
| ATP11A | autosis |
| ATP11C | autosis |
| B4GALT6 | autosis |
| CA6 | autosis |
| CCDC93 | autosis |
| CHPF2 | autosis |
| FOCAD | autosis |
| GJD3 | autosis |
| NUBPL | autosis |
| PDSS1 | autosis |
| PIGN | autosis |
| PIGO | autosis |
| RHOQ | autosis |
| SLC18A1 | autosis |
| SLC39A8 | autosis |
| SPIDR | autosis |
| TAF1C | autosis |
| TSC22D2 | autosis |
| TTPAL | autosis |
| ZNF442 | autosis |
| MPPE1 | autosis |
| EPS8L2 | autosis |
| ZHX3 | autosis |
| PPP1R7 | autosis |
| WAPL | autosis |
| TMCC1 | autosis |
| ATP11B | autosis |
| N4BP1 | autosis |
| SPSB1 | autosis |
| GM2A | autosis |
| CBR3 | autosis |
| CIR1 | autosis |
| PRRG4 | autosis |
| RFC5 | autosis |
| SNU13 | autosis |
| AK2 | autosis |
| BTN2A1 | autosis |
| ITSN1 | autosis |
| MKLN1 | autosis |
| MPZL2 | autosis |
| NUP58 | autosis |
| RETREG2 | autosis |
| SECISBP2L | autosis |
| UBTF | autosis |
| ZNF93 | autosis |
| ZSCAN31 | autosis |
| HADH | autosis |
| LAPTM5 | autosis |
| PPP2CB | autosis |
| HIC2 | autosis |
| SLC38A6 | autosis |
| CEBPG | autosis |
| ARFGEF2 | autosis |
| ATP6V0A2 | autosis |
| BDH1 | autosis |
| BTD | autosis |
| CHORDC1 | autosis |
| DERA | autosis |
| HTT | autosis |
| MRPL40 | autosis |
| NREP | autosis |
| PGM3 | autosis |
| POMP | autosis |
| PSMD3 | autosis |
| RAD1 | autosis |
| SYNPO | autosis |
| GNB1 | autosis |
| RAB11FIP1 | autosis |
| ACBD3 | autosis |
| AGO3 | autosis |
| AP2A2 | autosis |
| ATP2B3 | autosis |
| ATP2C2 | autosis |
| CISD1 | autosis |
| CSTF1 | autosis |
| EIF2B1 | autosis |
| HIVEP2 | autosis |
| INAVA | autosis |
| IQCC | autosis |
| KCNK1 | autosis |
| KIF3C | autosis |
| MEGF9 | autosis |
| NRBF2 | autosis |
| PRIM1 | autosis |
| RCAN3 | autosis |
| SLC12A7 | autosis |
| STX3 | autosis |
| TCF20 | autosis |
| THAP10 | autosis |
| TRMT12 | autosis |
| USPL1 | autosis |
| VPS4B | autosis |
| ZDHHC3 | autosis |
| SF1 | autosis |
| EN1 | autosis |
| RIOK3 | autosis |
| EFHD2 | autosis |
| ACOT13 | autosis |
| HSD17B10 | autosis |
| POLE2 | autosis |
| WDCP | autosis |
| CLCF1 | autosis |
| GNPNAT1 | autosis |
| AK1 | autosis |
| GABBR2 | autosis |
| TIMM10 | autosis |
| ADAT1 | autosis |
| DBF4 | autosis |
| DNAJB14 | autosis |
| GPR3 | autosis |
| PRRC1 | autosis |
| TM7SF3 | autosis |
| ADNP2 | autosis |
| ALDH3B2 | autosis |
| ALG6 | autosis |
| ALG8 | autosis |
| ANKRD10 | autosis |
| AP3B2 | autosis |
| AP3M2 | autosis |
| AP3S2 | autosis |
| ARSJ | autosis |
| ATP6V0E2 | autosis |
| ATP6V1B2 | autosis |
| ATP9A | autosis |
| ATXN10 | autosis |
| BAHD1 | autosis |
| BIN3 | autosis |
| BRWD1 | autosis |
| BSCL2 | autosis |
| BSDC1 | autosis |
| C11orf71 | autosis |
| C1orf112 | autosis |
| C3orf52 | autosis |
| C6orf120 | autosis |
| CCDC15 | autosis |
| CCDC28B | autosis |
| CCNT2 | autosis |
| CDK17 | autosis |
| CDKN2AIP | autosis |
| CHIC2 | autosis |
| CLCN6 | autosis |
| CLK4 | autosis |
| CLN5 | autosis |
| COX16 | autosis |
| CSNK1G1 | autosis |
| CTNS | autosis |
| DCUN1D2 | autosis |
| DENND4C | autosis |
| DHRS1 | autosis |
| DOLK | autosis |
| DPM2 | autosis |
| DPM3 | autosis |
| DPY19L1 | autosis |
| DYNC1LI1 | autosis |
| EEF1AKMT3 | autosis |
| EMC9 | autosis |
| EML3 | autosis |
| ERG28 | autosis |
| ERLIN1 | autosis |
| FAM189A2 | autosis |
| FAM86B1 | autosis |
| FBXL12 | autosis |
| FBXO38 | autosis |
| FBXO9 | autosis |
| FEM1C | autosis |
| GEMIN6 | autosis |
| HINFP | autosis |
| IBTK | autosis |
| INTS5 | autosis |
| INTS9 | autosis |
| IQCB1 | autosis |
| ISOC2 | autosis |
| KCTD14 | autosis |
| KHNYN | autosis |
| KLHL24 | autosis |
| LAGE3 | autosis |
| LHFPL2 | autosis |
| LIPT1 | autosis |
| LMBR1L | autosis |
| LRIF1 | autosis |
| LUC7L | autosis |
| MED22 | autosis |
| MID2 | autosis |
| MKRN1 | autosis |
| MRPS34 | autosis |
| MSRB2 | autosis |
| MYO9A | autosis |
| NRGN | autosis |
| OSER1 | autosis |
| PEX11B | autosis |
| PGAP2 | autosis |
| PHTF1 | autosis |
| PIGC | autosis |
| POLR2I | autosis |
| POLR2L | autosis |
| PPP2R5B | autosis |
| PRR16 | autosis |
| PSG6 | autosis |
| PTCD2 | autosis |
| PTDSS1 | autosis |
| R3HCC1L | autosis |
| RAB29 | autosis |
| RABGAP1 | autosis |
| RBM48 | autosis |
| RHOBTB3 | autosis |
| RIPOR1 | autosis |
| RPL38 | autosis |
| RRAGA | autosis |
| RRAGC | autosis |
| RRAGD | autosis |
| SEC24B | autosis |
| SFSWAP | autosis |
| SLC25A38 | autosis |
| SNRNP25 | autosis |
| SPTSSA | autosis |
| SRSF8 | autosis |
| STBD1 | autosis |
| TAF10 | autosis |
| TBC1D2 | autosis |
| TBC1D2B | autosis |
| TCTA | autosis |
| TCTN3 | autosis |
| TGDS | autosis |
| THYN1 | autosis |
| TJAP1 | autosis |
| TMEM109 | autosis |
| TMEM223 | autosis |
| TMEM80 | autosis |
| TOR3A | autosis |
| TSEN2 | autosis |
| TUBA1A | autosis |
| TXNL4B | autosis |
| UBXN7 | autosis |
| UGGT2 | autosis |
| UPF2 | autosis |
| UPF3B | autosis |
| UQCR10 | autosis |
| USB1 | autosis |
| VCPKMT | autosis |
| WBP4 | autosis |
| WDR47 | autosis |
| WDR5B | autosis |
| WIPI1 | autosis |
| ZBED8 | autosis |
| ZBTB25 | autosis |
| ZBTB43 | autosis |
| ZC2HC1A | autosis |
| ZC3H7A | autosis |
| ZMYM5 | autosis |
| ZNF140 | autosis |
| ZNF174 | autosis |
| ZNF212 | autosis |
| ZNF239 | autosis |
| ZNF282 | autosis |
| ZNF394 | autosis |
| ZNF473 | autosis |
| ZNF507 | autosis |
| ZNF83 | autosis |
| ARHGEF3 | autosis |
| ATP2A1 | autosis |
| FXYD2 | autosis |
| PLCL2 | autosis |
| TMEM160 | autosis |
| AP1S1 | autosis |
| BLOC1S1 | autosis |
| GMFB | autosis |
| ABHD14A | autosis |
| ABHD3 | autosis |
| ABTB2 | autosis |
| ADCY7 | autosis |
| AGBL5 | autosis |
| AKAP8L | autosis |
| ANAPC13 | autosis |
| ANAPC15 | autosis |
| ANKFY1 | autosis |
| AP1AR | autosis |
| ARHGAP12 | autosis |
| ARHGAP45 | autosis |
| ARMCX2 | autosis |
| ARMCX6 | autosis |
| ART4 | autosis |
| ASTE1 | autosis |
| ATP10B | autosis |
| ATP10D | autosis |
| ATP1B3 | autosis |
| ATP8B3 | autosis |
| ATP8B4 | autosis |
| ATP9B | autosis |
| BCL7C | autosis |
| BET1 | autosis |
| BOLA1 | autosis |
| BPGM | autosis |
| BTN2A2 | autosis |
| C1orf216 | autosis |
| C6orf89 | autosis |
| C9orf40 | autosis |
| CCDC28A | autosis |
| CCSER2 | autosis |
| CDR2L | autosis |
| CENPS | autosis |
| CEP112 | autosis |
| CEPT1 | autosis |
| CHST2 | autosis |
| CLN6 | autosis |
| CMC4 | autosis |
| CNIH3 | autosis |
| COA4 | autosis |
| COQ10B | autosis |
| CSGALNACT2 | autosis |
| CSTF2T | autosis |
| CSTF3 | autosis |
| DCAF8 | autosis |
| DET1 | autosis |
| DHX34 | autosis |
| DNAAF2 | autosis |
| DNAJB2 | autosis |
| DNAJB9 | autosis |
| DNPH1 | autosis |
| DUSP12 | autosis |
| EEF2KMT | autosis |
| EID1 | autosis |
| ETFB | autosis |
| EXOG | autosis |
| EXTL2 | autosis |
| FAM169A | autosis |
| FAM53C | autosis |
| FARSA | autosis |
| FGD6 | autosis |
| FICD | autosis |
| FMO1 | autosis |
| FNBP4 | autosis |
| FNTA | autosis |
| FNTB | autosis |
| GK | autosis |
| GMEB2 | autosis |
| GNPDA1 | autosis |
| GOLGA4 | autosis |
| GPATCH3 | autosis |
| GPATCH8 | autosis |
| GPBP1L1 | autosis |
| GPR137B | autosis |
| GPR176 | autosis |
| GPRC5B | autosis |
| GTF3C2 | autosis |
| GTPBP2 | autosis |
| HDDC2 | autosis |
| HS1BP3 | autosis |
| IFRD2 | autosis |
| INPP5E | autosis |
| KIAA1549L | autosis |
| KIZ | autosis |
| KPNA5 | autosis |
| LCMT2 | autosis |
| LIN37 | autosis |
| LINC01963 | autosis |
| LYST | autosis |
| MANSC1 | autosis |
| MAP4K2 | autosis |
| MDFIC | autosis |
| MDM1 | autosis |
| MEAK7 | autosis |
| MED17 | autosis |
| METTL18 | autosis |
| MGST2 | autosis |
| MPHOSPH9 | autosis |
| MRPL18 | autosis |
| MRPL34 | autosis |
| MRPL57 | autosis |
| MRPS14 | autosis |
| MTMR1 | autosis |
| MXD4 | autosis |
| MYT1 | autosis |
| NDEL1 | autosis |
| NDUFA3 | autosis |
| NDUFA7 | autosis |
| NDUFAF7 | autosis |
| NFRKB | autosis |
| NHP2 | autosis |
| NPIPA1 | autosis |
| NSMAF | autosis |
| NUDT19 | autosis |
| NUDT4 | autosis |
| NUP50 | autosis |
| ORC3 | autosis |
| ORC4 | autosis |
| ORC5 | autosis |
| OSBPL2 | autosis |
| OSBPL3 | autosis |
| PCYOX1L | autosis |
| PELO | autosis |
| PEX12 | autosis |
| PHF3 | autosis |
| PLCXD1 | autosis |
| PLEKHB2 | autosis |
| PLEKHO2 | autosis |
| PLGRKT | autosis |
| PNISR | autosis |
| PNPLA4 | autosis |
| POGLUT2 | autosis |
| POLR1A | autosis |
| POLR1B | autosis |
| PPIC | autosis |
| PRDM10 | autosis |
| PRRC2B | autosis |
| PWP2 | autosis |
| PXMP2 | autosis |
| PYCR3 | autosis |
| RAB8B | autosis |
| RABGGTB | autosis |
| RANBP6 | autosis |
| RGS7 | autosis |
| RMND5A | autosis |
| RNASE6 | autosis |
| RNASEH1P1 | autosis |
| RNF103 | autosis |
| RNF19B | autosis |
| RNF44 | autosis |
| RNFT2 | autosis |
| RP2 | autosis |
| RSAD1 | autosis |
| RTL6 | autosis |
| RWDD2A | autosis |
| SCGB1D1 | autosis |
| SDHAF3 | autosis |
| SEC24A | autosis |
| SEC24D | autosis |
| SH3D19 | autosis |
| SLC30A5 | autosis |
| SLC35B3 | autosis |
| SLC43A3 | autosis |
| SLF2 | autosis |
| SMARCD2 | autosis |
| SMCO4 | autosis |
| SMIM29 | autosis |
| SNN | autosis |
| SNX16 | autosis |
| SREK1 | autosis |
| STK19B | autosis |
| STX10 | autosis |
| STX5 | autosis |
| STX8 | autosis |
| SURF2 | autosis |
| SYNC | autosis |
| SYNGR3 | autosis |
| TBC1D15 | autosis |
| TBC1D17 | autosis |
| TCEA1P2 | autosis |
| TEX261 | autosis |
| THTPA | autosis |
| TIMM8B | autosis |
| TMCO6 | autosis |
| TMEM177 | autosis |
| TMEM251 | autosis |
| TMEM39A | autosis |
| TMX4 | autosis |
| TNPO2 | autosis |
| TRMT2B | autosis |
| TVP23B | autosis |
| UBL3 | autosis |
| UBXN8 | autosis |
| UROS | autosis |
| USP36 | autosis |
| UTP3 | autosis |
| VPS37B | autosis |
| VSIG2 | autosis |
| WFS1 | autosis |
| YLPM1 | autosis |
| YRDC | autosis |
| ZBTB14 | autosis |
| ZBTB40 | autosis |
| ZCCHC14 | autosis |
| ZDHHC4 | autosis |
| ZMYM3 | autosis |
| ZNF112 | autosis |
| ZNF16 | autosis |
| ZNF254 | autosis |
| ZNF274 | autosis |
| ZNF322P1 | autosis |
| ZNF426 | autosis |
| ZNF512B | autosis |
| ZNF557 | autosis |
| ABL1 | autophagy |
| ABL2 | autophagy |
| AGER | autophagy |
| AKT1 | autophagy |
| ATM | autophagy |
| ATP6V0C | autophagy |
| BCL2 | autophagy |
| BCL2L1 | autophagy |
| CASP1 | autophagy |
| CASP3 | autophagy |
| CRX | autophagy |
| CSNK2A2 | autophagy |
| CTSK | autophagy |
| DAPK3 | autophagy |
| EEF1A2 | autophagy |
| ERN1 | autophagy |
| GFAP | autophagy |
| HGF | autophagy |
| HIF1A | autophagy |
| HMGB1 | autophagy |
| HNRNPC | autophagy |
| HSPB1 | autophagy |
| HTRA2 | autophagy |
| IFNA1 | autophagy |
| IFNA2 | autophagy |
| IFNG | autophagy |
| IL6 | autophagy |
| INS | autophagy |
| KAT8 | autophagy |
| KDR | autophagy |
| LAMP3 | autophagy |
| LEP | autophagy |
| MAPK3 | autophagy |
| MAPK8 | autophagy |
| MEFV | autophagy |
| MET | autophagy |
| MTOR | autophagy |
| NLRP6 | autophagy |
| NPC1 | autophagy |
| PIK3CB | autophagy |
| PIKFYVE | autophagy |
| PRKAA1 | autophagy |
| PRKAA2 | autophagy |
| PRKN | autophagy |
| RIMS2 | autophagy |
| RUBCN | autophagy |
| SIRT1 | autophagy |
| SIRT2 | autophagy |
| SLTM | autophagy |
| SNCA | autophagy |
| SOS1 | autophagy |
| SREBF2 | autophagy |
| TAB2 | autophagy |
| TLR8 | autophagy |
| TP53INP2 | autophagy |
| TPCN2 | autophagy |
| TRIM21 | autophagy |
| TSPO | autophagy |
| USP13 | autophagy |
| ZBTB17 | autophagy |
| UVRAG | autophagy |
| STK11 | autophagy |
| TSC1 | autophagy |
| UCHL1 | autophagy |
| FBXW7 | autophagy |
| U2AF1 | autophagy |
| DAPK1 | autophagy |
| IFNA17 | autophagy |
| ATG7 | autophagy |
| DCN | autophagy |
| EMP2 | autophagy |
| FGF23 | autophagy |
| HDAC6 | autophagy |
| IFNA13 | autophagy |
| KAT2A | autophagy |
| LGALS9 | autophagy |
| UBQLN2 | autophagy |
| BNIP3 | autophagy |
| MAP1LC3B | autophagy |
| PLK2 | autophagy |
| CDK5R1 | autophagy |
| EEF1A1 | autophagy |
| GAPDH | autophagy |
| TOP2A | autophagy |
| ADRB2 | autophagy |
| EP300 | autophagy |
| RAB7A | autophagy |
| RIPK2 | autophagy |
| BAD | autophagy |
| ATG5 | autophagy |
| BECN1 | autophagy |
| BNIP3L | autophagy |
| CAPN1 | autophagy |
| DAP | autophagy |
| DAPK2 | autophagy |
| DNM1L | autophagy |
| FOXO1 | autophagy |
| FZD5 | autophagy |
| GABARAPL1 | autophagy |
| HCP5 | autophagy |
| LEPR | autophagy |
| LZTS1 | autophagy |
| MTDH | autophagy |
| MTMR3 | autophagy |
| NEDD4 | autophagy |
| NOD1 | autophagy |
| PTPN22 | autophagy |
| RAB1B | autophagy |
| RAB5A | autophagy |
| SQSTM1 | autophagy |
| TBK1 | autophagy |
| TFEB | autophagy |
| TRIM13 | autophagy |
| ULK1 | autophagy |
| VDAC1 | autophagy |
| XBP1 | autophagy |
| FLCN | autophagy |
| TRIM65 | autophagy |
| CTTN | autophagy |
| CDK5 | autophagy |
| IFT88 | autophagy |
| RASIP1 | autophagy |
| BMP1 | autophagy |
| CDH6 | autophagy |
| LRRK2 | autophagy |
| PDK1 | autophagy |
| PDPK1 | autophagy |
| SNX5 | autophagy |
| TPCN1 | autophagy |
| VCP | autophagy |
| GATA4 | autophagy |
| SPTLC2 | autophagy |
| GOLGA2 | autophagy |
| KDM4A | autophagy |
| PSAP | autophagy |
| USP10 | autophagy |
| ATG12 | autophagy |
| ATG4A | autophagy |
| ATP6V1A | autophagy |
| CISD2 | autophagy |
| FBXL2 | autophagy |
| FEZ1 | autophagy |
| GALNT2 | autophagy |
| MAPT | autophagy |
| MT3 | autophagy |
| PGK1 | autophagy |
| PIK3R4 | autophagy |
| PIM2 | autophagy |
| PRXL2C | autophagy |
| RAB12 | autophagy |
| RAB3GAP2 | autophagy |
| REV3L | autophagy |
| SH3GLB1 | autophagy |
| SLC17A9 | autophagy |
| TIGAR | autophagy |
| TP53INP1 | autophagy |
| UBQLN1 | autophagy |
| UBQLN4 | autophagy |
| USP33 | autophagy |
| WBP11 | autophagy |
| NEK7 | autophagy |
| SREBF1 | autophagy |
| ST8SIA4 | autophagy |
| ATG4B | autophagy |
| GUK1 | autophagy |
| HAX1 | autophagy |
| IFI16 | autophagy |
| MAPK10 | autophagy |
| ACTL6A | autophagy |
| SH3BP4 | autophagy |
| IRF4 | autophagy |
| CYP21A2 | autophagy |
| PIK3R2 | autophagy |
| ATG4D | autophagy |
| CAPNS1 | autophagy |
| DIRAS1 | autophagy |
| LETM2 | autophagy |
| PINK1 | autophagy |
| TAB3 | autophagy |
| ZC3H12A | autophagy |
| ATP6V0D1 | autophagy |
| EXOC4 | autophagy |
| GSK3A | autophagy |
| HCAR2 | autophagy |
| IFNA8 | autophagy |
| LTBP4 | autophagy |
| RAB3GAP1 | autophagy |
| XBP1P1 | autophagy |
| USP32 | autophagy |
| CNN1 | autophagy |
| CLN3 | autophagy |
| ACAT2 | autophagy |
| IAPP | autophagy |
| ITPR1 | autophagy |
| PARK7 | autophagy |
| SPTLC1 | autophagy |
| VMP1 | autophagy |
| LCOR | autophagy |
| RB1CC1 | autophagy |
| AMBRA1 | autophagy |
| LAMB1 | autophagy |
| LARP1 | autophagy |
| PLEKHF1 | autophagy |
| QSOX1 | autophagy |
| SNRNP70 | autophagy |
| TLK2 | autophagy |
| TRIM8 | autophagy |
| ULK2 | autophagy |
| USP9Y | autophagy |
| ZKSCAN3 | autophagy |
| CPS1 | autophagy |
| PGM1 | autophagy |
| PROK2 | autophagy |
| SCOC | autophagy |
| EIF2AK4 | autophagy |
| TBC1D25 | autophagy |
| PAFAH1B2 | autophagy |
| TFAP2C | autophagy |
| PIP4K2B | autophagy |
| RAB20 | autophagy |
| RUVBL1 | autophagy |
| SNX6 | autophagy |
| WDFY3 | autophagy |
| ATG3 | autophagy |
| ATP6V1E1 | autophagy |
| DRAM2 | autophagy |
| PIK3C3 | autophagy |
| TRIM22 | autophagy |
| U2AF2 | autophagy |
| ATG14 | autophagy |
| EPM2A | autophagy |
| P2RY13 | autophagy |
| SNX32 | autophagy |
| EXOC7 | autophagy |
| MTM1 | autophagy |
| RPL28 | autophagy |
| EXOC1 | autophagy |
| ARPP19 | autophagy |
| FRMD5 | autophagy |
| NRBP2 | autophagy |
| GBA | autophagy |
| CHMP4B | autophagy |
| DPY30 | autophagy |
| DRAM1 | autophagy |
| FAM189B | autophagy |
| IFNA5 | autophagy |
| LRSAM1 | autophagy |
| RNF5 | autophagy |
| SOAT2 | autophagy |
| SOGA1 | autophagy |
| ZKSCAN4 | autophagy |
| ATP6V1C1 | autophagy |
| BECN2 | autophagy |
| PWWP3A | autophagy |
| CTSA | autophagy |
| HTR2B | autophagy |
| ATP6V0D2 | autophagy |
| ATP6V0A1 | autophagy |
| WAC | autophagy |
| CALCOCO2 | autophagy |
| DNPEP | autophagy |
| IFT20 | autophagy |
| RNF152 | autophagy |
| VPS35 | autophagy |
| MRPL3 | autophagy |
| RAB33A | autophagy |
| VPS13C | autophagy |
| GABARAP | autophagy |
| ATP6V0A2 | autophagy |
| ATG4C | autophagy |
| NRBF2 | autophagy |
| PIP4K2A | autophagy |
| PIP4K2C | autophagy |
| MOCS2 | autophagy |
| DNAJC19 | autophagy |
| KRBA1 | autophagy |
| MRPL20 | autophagy |
| ATP6V0E2 | autophagy |
| ATP6V1B2 | autophagy |
| MID2 | autophagy |
| RRAGA | autophagy |
| RRAGC | autophagy |
| RRAGD | autophagy |
| SVIP | autophagy |
| TBC1D5 | autophagy |
| ATP6V0B | autophagy |
| ATP6V1H | autophagy |
| ABTB2 | autophagy |
| ATP13A2 | autophagy |
| ATP6V0E1 | autophagy |
| ATP6V1B1 | autophagy |
| ATP6V1C2 | autophagy |
| ATP6V1D | autophagy |
| ATP6V1E2 | autophagy |
| ATP6V1G1 | autophagy |
| ATP6V1G2 | autophagy |
| CARD17 | autophagy |
| CDAN1 | autophagy |
| CHMP4A | autophagy |
| CPZ | autophagy |
| CYCSP5 | autophagy |
| DAPL1 | autophagy |
| EXOC8 | autophagy |
| FEZ2 | autophagy |
| FUCA2 | autophagy |
| GABARAPL2 | autophagy |
| GAL3ST3 | autophagy |
| HERC1 | autophagy |
| IFNA10 | autophagy |
| IFNA14 | autophagy |
| IFNA16 | autophagy |
| IFNA21 | autophagy |
| IFNA4 | autophagy |
| IFNA6 | autophagy |
| IFNA7 | autophagy |
| KERA | autophagy |
| KIF25 | autophagy |
| KLHL11 | autophagy |
| KLRF1 | autophagy |
| LST1 | autophagy |
| MTCH1 | autophagy |
| MTCL1 | autophagy |
| MTMR8 | autophagy |
| MTMR9 | autophagy |
| NAT16 | autophagy |
| PARL | autophagy |
| PDZD11 | autophagy |
| PHF23 | autophagy |
| PLEKHG2 | autophagy |
| PLXNA4 | autophagy |
| PM20D1 | autophagy |
| POLR3A | autophagy |
| PXK | autophagy |
| PYDC1 | autophagy |
| RAB33B | autophagy |
| RALB | autophagy |
| RELL1 | autophagy |
| RRAGB | autophagy |
| RTF2 | autophagy |
| SCFD1 | autophagy |
| SLC26A11 | autophagy |
| SOGA3 | autophagy |
| SUPT5H | autophagy |
| TBC1D12 | autophagy |
| TBC1D14 | autophagy |
| TMEM59 | autophagy |
| ULK3 | autophagy |
| USP36 | autophagy |
| VPS26A | autophagy |
| VPS26B | autophagy |
| WDR6 | autophagy |
| WDR75 | autophagy |
| ZDHHC8 | autophagy |
| ZNF416 | autophagy |
| ZNF554 | autophagy |
| ZNF599 | autophagy |
| ZNF831 | autophagy |
| ARL13B | autophagy |
| ATG10 | autophagy |
| ATG101 | autophagy |
| ATG13 | autophagy |
| ATG16L1 | autophagy |
| ATG9A | autophagy |
| ATG9B | autophagy |
| CETN1 | autophagy |
| CFTR | autophagy |
| CHMP2A | autophagy |
| CHMP2B | autophagy |
| CHMP3 | autophagy |
| CHMP4C | autophagy |
| CHMP6 | autophagy |
| CHMP7 | autophagy |
| CSNK2A1 | autophagy |
| CSNK2B | autophagy |
| DYNC1H1 | autophagy |
| DYNC1I1 | autophagy |
| DYNC1I2 | autophagy |
| DYNC1LI1 | autophagy |
| DYNC1LI2 | autophagy |
| DYNLL1 | autophagy |
| DYNLL2 | autophagy |
| EPAS1 | autophagy |
| FUNDC1 | autophagy |
| HBB | autophagy |
| HSF1 | autophagy |
| HSP90AA1 | autophagy |
| HSP90AB1 | autophagy |
| HSPA8 | autophagy |
| LAMP2 | autophagy |
| LAMTOR1 | autophagy |
| LAMTOR2 | autophagy |
| LAMTOR3 | autophagy |
| LAMTOR4 | autophagy |
| LAMTOR5 | autophagy |
| MAP1LC3A | autophagy |
| MAP1LC3C | autophagy |
| MFN1 | autophagy |
| MFN2 | autophagy |
| MLST8 | autophagy |
| MTERF3 | autophagy |
| MTMR14 | autophagy |
| MVB12A | autophagy |
| MVB12B | autophagy |
| NBR1 | autophagy |
| PCNT | autophagy |
| PEX5 | autophagy |
| PGAM5 | autophagy |
| PLIN2 | autophagy |
| PLIN3 | autophagy |
| PRKAB1 | autophagy |
| PRKAB2 | autophagy |
| PRKAG1 | autophagy |
| PRKAG2 | autophagy |
| PRKAG3 | autophagy |
| RHEB | autophagy |
| RNASE1 | autophagy |
| RPS27A | autophagy |
| RPTOR | autophagy |
| SLC38A9 | autophagy |
| SRC | autophagy |
| TOMM20 | autophagy |
| TOMM22 | autophagy |
| TOMM40 | autophagy |
| TOMM5 | autophagy |
| TOMM6 | autophagy |
| TOMM7 | autophagy |
| TOMM70 | autophagy |
| TSC2 | autophagy |
| TSG101 | autophagy |
| TUBA1A | autophagy |
| TUBA1B | autophagy |
| TUBA1C | autophagy |
| TUBA3C | autophagy |
| TUBA3D | autophagy |
| TUBA3E | autophagy |
| TUBA4A | autophagy |
| TUBA4B | autophagy |
| TUBA8 | autophagy |
| TUBAL3 | autophagy |
| TUBB1 | autophagy |
| TUBB2A | autophagy |
| TUBB2B | autophagy |
| TUBB3 | autophagy |
| TUBB4A | autophagy |
| TUBB4B | autophagy |
| TUBB6 | autophagy |
| TUBB8 | autophagy |
| TUBB8B | autophagy |
| UBA52 | autophagy |
| UBAP1 | autophagy |
| UBB | autophagy |
| UBC | autophagy |
| UBE2N | autophagy |
| UBE2V1 | autophagy |
| USP30 | autophagy |
| VIM | autophagy |
| VPS28 | autophagy |
| VPS37A | autophagy |
| VPS37B | autophagy |
| VPS37C | autophagy |
| VPS37D | autophagy |
| WDR45 | autophagy |
| WDR45B | autophagy |
| WIPI1 | autophagy |
| WIPI2 | autophagy |
| AKT1S1 | autophagy |
| DEPTOR | autophagy |
| ARHGAP4 | autophagy |
| ARNTL | autophagy |
| BHLHE40 | autophagy |
| BHLHE41 | autophagy |
| BMP2 | autophagy |
| BMP3 | autophagy |
| BMP4 | autophagy |
| BMP5 | autophagy |
| BMP6 | autophagy |
| BMPR2 | autophagy |
| CALCA | autophagy |
| CHRD | autophagy |
| CLOCK | autophagy |
| CRY1 | autophagy |
| CSF1 | autophagy |
| CTF1 | autophagy |
| CTHRC1 | autophagy |
| DKK1 | autophagy |
| EFNB2 | autophagy |
| FYCO1 | autophagy |
| IGF1 | autophagy |
| IL3 | autophagy |
| JAK2 | autophagy |
| LRP5 | autophagy |
| MEPE | autophagy |
| NFATC1 | autophagy |
| NOTCH1 | autophagy |
| NPAS2 | autophagy |
| NR1D2 | autophagy |
| PER1 | autophagy |
| PLEKHM1 | autophagy |
| PTH | autophagy |
| RORB | autophagy |
| RUNX2 | autophagy |
| SEMA3A | autophagy |
| SEMA4D | autophagy |
| SERPINF1 | autophagy |
| SMAD1 | autophagy |
| SMAD4 | autophagy |
| SMAD5 | autophagy |
| SMAD9 | autophagy |
| SOST | autophagy |
| SP7 | autophagy |
| TGFB1 | autophagy |
| TNFRSF11A | autophagy |
| TNFRSF11B | autophagy |
| TNFSF11 | autophagy |
| TRAF6 | autophagy |
| TRAP1 | autophagy |
| WNT10B | autophagy |
| WNT16 | autophagy |
| WNT5A | autophagy |
| ACER2 | autophagy |
| ADRA1A | autophagy |
| ATF6 | autophagy |
| ATG2A | autophagy |
| ATG2B | autophagy |
| AUP1 | autophagy |
| BAG3 | autophagy |
| BCL2L11 | autophagy |
| BMF | autophagy |
| BOK | autophagy |
| C9orf72 | autophagy |
| CAMKK2 | autophagy |
| CDC37 | autophagy |
| CLEC16A | autophagy |
| CLU | autophagy |
| CPTP | autophagy |
| DDIT3 | autophagy |
| DDRGK1 | autophagy |
| DEPDC5 | autophagy |
| DEPP1 | autophagy |
| DHRSX | autophagy |
| EIF4G1 | autophagy |
| EIF4G2 | autophagy |
| ELAPOR1 | autophagy |
| ERCC4 | autophagy |
| FBXO7 | autophagy |
| FOXK1 | autophagy |
| FOXK2 | autophagy |
| FOXO3 | autophagy |
| FTH1 | autophagy |
| FTL | autophagy |
| GNAI3 | autophagy |
| GPR137 | autophagy |
| GPR137B | autophagy |
| GPSM1 | autophagy |
| GSK3B | autophagy |
| HMOX1 | autophagy |
| HSPB8 | autophagy |
| HTT | autophagy |
| HUWE1 | autophagy |
| IKBKG | autophagy |
| IL10 | autophagy |
| IL10RA | autophagy |
| IL4 | autophagy |
| IRGM | autophagy |
| KAT5 | autophagy |
| KEAP1 | autophagy |
| KLHL22 | autophagy |
| KLHL3 | autophagy |
| LACRT | autophagy |
| LAMP1 | autophagy |
| LGALS8 | autophagy |
| MAP3K7 | autophagy |
| MAPK15 | autophagy |
| MCL1 | autophagy |
| MFSD8 | autophagy |
| MIR199A1 | autophagy |
| MIRLET7B | autophagy |
| MTMR4 | autophagy |
| NCOA4 | autophagy |
| NOD2 | autophagy |
| NPRL2 | autophagy |
| NUPR1 | autophagy |
| OPTN | autophagy |
| ORMDL3 | autophagy |
| OSBPL7 | autophagy |
| PHB2 | autophagy |
| PIK3C2A | autophagy |
| PIK3CA | autophagy |
| PJVK | autophagy |
| PLK3 | autophagy |
| POLDIP2 | autophagy |
| PRKACA | autophagy |
| PRKD1 | autophagy |
| PYCARD | autophagy |
| RAB39B | autophagy |
| RAB8A | autophagy |
| RETREG1 | autophagy |
| RETREG3 | autophagy |
| RMC1 | autophagy |
| RNF41 | autophagy |
| ROCK1 | autophagy |
| RUFY4 | autophagy |
| SEC22B | autophagy |
| SESN1 | autophagy |
| SESN2 | autophagy |
| SESN3 | autophagy |
| SMCR8 | autophagy |
| SMG1 | autophagy |
| STAT3 | autophagy |
| STBD1 | autophagy |
| STING1 | autophagy |
| STUB1 | autophagy |
| SYNPO2 | autophagy |
| TEX264 | autophagy |
| TICAM1 | autophagy |
| TMEM150A | autophagy |
| TMEM150B | autophagy |
| TMEM150C | autophagy |
| TMEM39A | autophagy |
| TMEM39B | autophagy |
| TP53 | autophagy |
| TREM2 | autophagy |
| TRIB3 | autophagy |
| TRIM14 | autophagy |
| TRIM27 | autophagy |
| TRIM34 | autophagy |
| TRIM38 | autophagy |
| TRIM5 | autophagy |
| TRIM6 | autophagy |
| TRIM68 | autophagy |
| TRIML1 | autophagy |
| TRIML2 | autophagy |
| UBA5 | autophagy |
| UFC1 | autophagy |
| UFL1 | autophagy |
| UFM1 | autophagy |
| VPS13D | autophagy |
| WASHC1 | autophagy |
| WDR24 | autophagy |
| WDR41 | autophagy |
| WDR81 | autophagy |
| ZMPSTE24 | autophagy |
| ABO | apoptosis |
| AKT1 | apoptosis |
| AMH | apoptosis |
| APP | apoptosis |
| ATM | apoptosis |
| BCL2 | apoptosis |
| BCL2L1 | apoptosis |
| BID | apoptosis |
| BMP2 | apoptosis |
| BMPR2 | apoptosis |
| C5 | apoptosis |
| CASP1 | apoptosis |
| CASP3 | apoptosis |
| CASP6 | apoptosis |
| CASP8 | apoptosis |
| CCL27 | apoptosis |
| CDC42 | apoptosis |
| CHUK | apoptosis |
| COMP | apoptosis |
| CYCS | apoptosis |
| FAS | apoptosis |
| FASLG | apoptosis |
| FASN | apoptosis |
| GZMB | apoptosis |
| HSPB1 | apoptosis |
| IFNG | apoptosis |
| IKBKG | apoptosis |
| IL1A | apoptosis |
| IL1B | apoptosis |
| IL1R1 | apoptosis |
| IL3RA | apoptosis |
| KDR | apoptosis |
| KRAS | apoptosis |
| KRT18 | apoptosis |
| MAPK1 | apoptosis |
| MAPK14 | apoptosis |
| MAPK3 | apoptosis |
| MAPKAPK2 | apoptosis |
| MYD88 | apoptosis |
| NFKB1 | apoptosis |
| NFKBIA | apoptosis |
| NGF | apoptosis |
| NOS3 | apoptosis |
| NTRK1 | apoptosis |
| PARP1 | apoptosis |
| PIK3CA | apoptosis |
| PIK3CB | apoptosis |
| PIK3CD | apoptosis |
| PIK3CG | apoptosis |
| PLA1A | apoptosis |
| PLA2G1B | apoptosis |
| PLA2G2A | apoptosis |
| PLA2G2D | apoptosis |
| PLA2G4A | apoptosis |
| PLA2G5 | apoptosis |
| PLA2G6 | apoptosis |
| PRF1 | apoptosis |
| PRKCB | apoptosis |
| PSMB5 | apoptosis |
| PSMB7 | apoptosis |
| PSMD1 | apoptosis |
| PSMD2 | apoptosis |
| PSMD8 | apoptosis |
| PSME3 | apoptosis |
| PTGS2 | apoptosis |
| RAF1 | apoptosis |
| RELA | apoptosis |
| RIPK1 | apoptosis |
| RNASE1 | apoptosis |
| RPS6KB1 | apoptosis |
| SERPINF2 | apoptosis |
| SP1 | apoptosis |
| STOML2 | apoptosis |
| TFDP1 | apoptosis |
| TGFB1 | apoptosis |
| TNF | apoptosis |
| TNFRSF1A | apoptosis |
| TNFSF10 | apoptosis |
| TP53 | apoptosis |
| VEGFA | apoptosis |
| VIM | apoptosis |
| ZFYVE9 | apoptosis |
| LEFTY1 | apoptosis |
| MYC | apoptosis |
| RNASE3 | apoptosis |
| RNH1 | apoptosis |
| SMAD2 | apoptosis |
| HRAS | apoptosis |
| PIK3R1 | apoptosis |
| PPP2R1A | apoptosis |
| INHBA | apoptosis |
| PTK2 | apoptosis |
| SMAD3 | apoptosis |
| CREBBP | apoptosis |
| NCOA3 | apoptosis |
| TGFB2 | apoptosis |
| BAX | apoptosis |
| CASP4 | apoptosis |
| CUL1 | apoptosis |
| DCN | apoptosis |
| GSN | apoptosis |
| LMNA | apoptosis |
| NFATC1 | apoptosis |
| NUMA1 | apoptosis |
| THBS1 | apoptosis |
| TGFBR1 | apoptosis |
| PSMB9 | apoptosis |
| MAP3K1 | apoptosis |
| ID3 | apoptosis |
| TGFBR2 | apoptosis |
| NRAS | apoptosis |
| EEF1A1 | apoptosis |
| ID4 | apoptosis |
| LSR | apoptosis |
| PSMA4 | apoptosis |
| PSME1 | apoptosis |
| RHOA | apoptosis |
| DFFB | apoptosis |
| PSMD12 | apoptosis |
| PIK3R3 | apoptosis |
| MAPK13 | apoptosis |
| TOP2A | apoptosis |
| EP300 | apoptosis |
| SMAD4 | apoptosis |
| BIRC2 | apoptosis |
| BIRC3 | apoptosis |
| MAP2K1 | apoptosis |
| PRKCA | apoptosis |
| AKT3 | apoptosis |
| LIMK1 | apoptosis |
| BAD | apoptosis |
| CASP9 | apoptosis |
| DIABLO | apoptosis |
| XIAP | apoptosis |
| SRC | apoptosis |
| ACVR1 | apoptosis |
| AKT2 | apoptosis |
| CAPN1 | apoptosis |
| CDKN2B | apoptosis |
| IL1RAP | apoptosis |
| IRAK1 | apoptosis |
| PCGF2 | apoptosis |
| PITX2 | apoptosis |
| PRKAR1A | apoptosis |
| PSMD14 | apoptosis |
| RAC1 | apoptosis |
| SMAD7 | apoptosis |
| SMURF2 | apoptosis |
| SPHK1 | apoptosis |
| THBS2 | apoptosis |
| TNFRSF10B | apoptosis |
| APAF1 | apoptosis |
| RBX1 | apoptosis |
| SATB1 | apoptosis |
| SMAD1 | apoptosis |
| SKP1 | apoptosis |
| ENDOG | apoptosis |
| FADD | apoptosis |
| TNFRSF10D | apoptosis |
| BMP4 | apoptosis |
| ID1 | apoptosis |
| BMP8A | apoptosis |
| BMPR1A | apoptosis |
| CASP10 | apoptosis |
| ETFA | apoptosis |
| FYN | apoptosis |
| MADD | apoptosis |
| RAC2 | apoptosis |
| SMURF1 | apoptosis |
| CFLAR | apoptosis |
| TRAF2 | apoptosis |
| GDF5 | apoptosis |
| FST | apoptosis |
| PSMD7 | apoptosis |
| RPS6KB2 | apoptosis |
| CASP7 | apoptosis |
| IKBKB | apoptosis |
| ARHGDIB | apoptosis |
| BMP8B | apoptosis |
| CAPN2 | apoptosis |
| E2F5 | apoptosis |
| NODAL | apoptosis |
| PPP2CA | apoptosis |
| PSMA1 | apoptosis |
| PSMA7 | apoptosis |
| PSMB8 | apoptosis |
| PSMC3 | apoptosis |
| PSMD4 | apoptosis |
| PXN | apoptosis |
| ROCK1 | apoptosis |
| ROCK2 | apoptosis |
| SEM1 | apoptosis |
| SPTAN1 | apoptosis |
| SUFU | apoptosis |
| TFAP2A | apoptosis |
| TGFB3 | apoptosis |
| THBS3 | apoptosis |
| THBS4 | apoptosis |
| TNFRSF10A | apoptosis |
| SREBF1 | apoptosis |
| TOP1 | apoptosis |
| ACVR2A | apoptosis |
| CSDE1 | apoptosis |
| TNFRSF10C | apoptosis |
| NAB2 | apoptosis |
| MAP2K2 | apoptosis |
| RBL2 | apoptosis |
| ACTA1 | apoptosis |
| ACVRL1 | apoptosis |
| BMP7 | apoptosis |
| CHP1 | apoptosis |
| ID2 | apoptosis |
| JMJD7-PLA2G4B | apoptosis |
| P2RX6 | apoptosis |
| PLA2G4B | apoptosis |
| SPHK2 | apoptosis |
| PIK3R2 | apoptosis |
| ACVR1C | apoptosis |
| AIFM1 | apoptosis |
| BMP6 | apoptosis |
| DFFA | apoptosis |
| IL3 | apoptosis |
| NFATC2 | apoptosis |
| PSME2 | apoptosis |
| BMP5 | apoptosis |
| E2F4 | apoptosis |
| PIDD1 | apoptosis |
| NFATC3 | apoptosis |
| PLCG1 | apoptosis |
| RBL1 | apoptosis |
| SLK | apoptosis |
| SMAD6 | apoptosis |
| PPP3CA | apoptosis |
| CASP2 | apoptosis |
| CRADD | apoptosis |
| ACVR2B | apoptosis |
| MAPK12 | apoptosis |
| PRKX | apoptosis |
| PSMB6 | apoptosis |
| SMAD5 | apoptosis |
| PSMA5 | apoptosis |
| BMPR1B | apoptosis |
| LMNB1 | apoptosis |
| GHRL | apoptosis |
| NOG | apoptosis |
| RAC3 | apoptosis |
| SIGMAR1 | apoptosis |
| CFL2 | apoptosis |
| ENDOD1 | apoptosis |
| FGF6 | apoptosis |
| GDF7 | apoptosis |
| IRAK4 | apoptosis |
| NT5C3A | apoptosis |
| PLA2G10 | apoptosis |
| PRKACA | apoptosis |
| PRKAR2A | apoptosis |
| PRKAR2B | apoptosis |
| PSMB1 | apoptosis |
| PSMC6 | apoptosis |
| PXDN | apoptosis |
| SMAD9 | apoptosis |
| USP25 | apoptosis |
| MAP3K14 | apoptosis |
| PRKACG | apoptosis |
| PSMD11 | apoptosis |
| NFAT5 | apoptosis |
| AMHR2 | apoptosis |
| LMNB2 | apoptosis |
| INHBC | apoptosis |
| IRAK2 | apoptosis |
| NANOS3 | apoptosis |
| RHOV | apoptosis |
| PSMC5 | apoptosis |
| NAA80 | apoptosis |
| LTBP1 | apoptosis |
| TANK | apoptosis |
| ATP2B4 | apoptosis |
| PLA2G3 | apoptosis |
| PPP2R1B | apoptosis |
| PSMB10 | apoptosis |
| PSMB4 | apoptosis |
| TRADD | apoptosis |
| CD244 | apoptosis |
| GAS2 | apoptosis |
| IRAK3 | apoptosis |
| MAPK11 | apoptosis |
| PLCG2 | apoptosis |
| PSMA6 | apoptosis |
| PSMB2 | apoptosis |
| ARID3B | apoptosis |
| ATP2B2 | apoptosis |
| PRKACB | apoptosis |
| INHBB | apoptosis |
| CHP2 | apoptosis |
| LEFTY2 | apoptosis |
| MAPKAPK3 | apoptosis |
| PIK3R5 | apoptosis |
| PSMA2 | apoptosis |
| PSMA8 | apoptosis |
| PSMC2 | apoptosis |
| PSMA3 | apoptosis |
| SHC2 | apoptosis |
| PSMC1 | apoptosis |
| CSF2RB | apoptosis |
| PPP2CB | apoptosis |
| CWC27 | apoptosis |
| PPP3CC | apoptosis |
| POMP | apoptosis |
| PSMD3 | apoptosis |
| PPP3R1 | apoptosis |
| NFATC4 | apoptosis |
| CHRD | apoptosis |
| CLCN7 | apoptosis |
| EXOG | apoptosis |
| FLRT1 | apoptosis |
| GDF6 | apoptosis |
| GLRX2 | apoptosis |
| INHBE | apoptosis |
| KCNMB1 | apoptosis |
| MYLPF | apoptosis |
| OAZ3 | apoptosis |
| PCF11 | apoptosis |
| PLA2G12A | apoptosis |
| PLA2G12B | apoptosis |
| PLA2G2C | apoptosis |
| PLA2G2E | apoptosis |
| PLA2G2F | apoptosis |
| PLA2G4E | apoptosis |
| PPP3CB | apoptosis |
| PPP3R2 | apoptosis |
| PRKAR1B | apoptosis |
| PRKCG | apoptosis |
| PSMA6P4 | apoptosis |
| PSMB11 | apoptosis |
| PSMB3 | apoptosis |
| PSMC1P4 | apoptosis |
| PSMC4 | apoptosis |
| PSMD13 | apoptosis |
| PSMD6 | apoptosis |
| PSME4 | apoptosis |
| PSMF1 | apoptosis |
| RNASEH1P1 | apoptosis |
| SAP18 | apoptosis |
| SH2D2A | apoptosis |
| ZBTB14 | apoptosis |
| ZFYVE16 | apoptosis |
| ANKRD13C | apoptosis |
| BMF | apoptosis |
| BRMS1 | apoptosis |
| CAV1 | apoptosis |
| CEACAM5 | apoptosis |
| CEACAM6 | apoptosis |
| CHEK2 | apoptosis |
| CRYBA1 | apoptosis |
| DAPK2 | apoptosis |
| E2F1 | apoptosis |
| ITGA5 | apoptosis |
| ITGB1 | apoptosis |
| MAP3K7 | apoptosis |
| MCL1 | apoptosis |
| MTOR | apoptosis |
| MYBBP1A | apoptosis |
| NOTCH1 | apoptosis |
| NTRK2 | apoptosis |
| PDK4 | apoptosis |
| PTRH2 | apoptosis |
| SIK1 | apoptosis |
| SNAI2 | apoptosis |
| STK11 | apoptosis |
| TLE1 | apoptosis |
| TLE5 | apoptosis |
| TSC2 | apoptosis |
| ZNF304 | apoptosis |
| AATF | apoptosis |
| ABL1 | apoptosis |
| ACAA2 | apoptosis |
| ACKR3 | apoptosis |
| ACVR1B | apoptosis |
| ADORA1 | apoptosis |
| ADORA2A | apoptosis |
| AEN | apoptosis |
| AGT | apoptosis |
| AGTR2 | apoptosis |
| ANXA6 | apoptosis |
| AR | apoptosis |
| ARHGEF2 | apoptosis |
| ARL6IP5 | apoptosis |
| ARMC10 | apoptosis |
| ARRB2 | apoptosis |
| ASAH2 | apoptosis |
| ATAD5 | apoptosis |
| ATF2 | apoptosis |
| ATF3 | apoptosis |
| ATF4 | apoptosis |
| ATP2A1 | apoptosis |
| ATP2A3 | apoptosis |
| ATP5IF1 | apoptosis |
| AVP | apoptosis |
| BAG3 | apoptosis |
| BAG5 | apoptosis |
| BAG6 | apoptosis |
| BAK1 | apoptosis |
| BBC3 | apoptosis |
| BCAP31 | apoptosis |
| BCL10 | apoptosis |
| BCL2A1 | apoptosis |
| BCL2L10 | apoptosis |
| BCL2L11 | apoptosis |
| BCL2L12 | apoptosis |
| BCL2L14 | apoptosis |
| BCL2L2 | apoptosis |
| BCL3 | apoptosis |
| BCLAF1 | apoptosis |
| BDKRB2 | apoptosis |
| BDNF | apoptosis |
| BECN1 | apoptosis |
| BEX3 | apoptosis |
| BIK | apoptosis |
| BIRC6 | apoptosis |
| BLOC1S2 | apoptosis |
| BMI1 | apoptosis |
| BNIP3 | apoptosis |
| BNIP3L | apoptosis |
| BOK | apoptosis |
| BRCA1 | apoptosis |
| BRCA2 | apoptosis |
| BRSK2 | apoptosis |
| BTK | apoptosis |
| C8orf44-SGK3 | apoptosis |
| CAAP1 | apoptosis |
| CASP12 | apoptosis |
| CASP5 | apoptosis |
| CASP8AP2 | apoptosis |
| CCAR2 | apoptosis |
| CD24 | apoptosis |
| CD27 | apoptosis |
| CD28 | apoptosis |
| CD38 | apoptosis |
| CD3E | apoptosis |
| CD44 | apoptosis |
| CD5 | apoptosis |
| CD70 | apoptosis |
| CD74 | apoptosis |
| CDIP1 | apoptosis |
| CDKN1A | apoptosis |
| CDKN2D | apoptosis |
| CEBPB | apoptosis |
| CHAC1 | apoptosis |
| CHCHD10 | apoptosis |
| CIB1 | apoptosis |
| CIDEB | apoptosis |
| CLU | apoptosis |
| COA8 | apoptosis |
| COL2A1 | apoptosis |
| CREB3 | apoptosis |
| CREB3L1 | apoptosis |
| CRIP1 | apoptosis |
| CSF2 | apoptosis |
| CSNK2A1 | apoptosis |
| CSNK2A2 | apoptosis |
| CTH | apoptosis |
| CTNNA1 | apoptosis |
| CTNNB1 | apoptosis |
| CTSC | apoptosis |
| CTSH | apoptosis |
| CTTN | apoptosis |
| CUL2 | apoptosis |
| CUL3 | apoptosis |
| CUL4A | apoptosis |
| CUL5 | apoptosis |
| CX3CL1 | apoptosis |
| CX3CR1 | apoptosis |
| CXCL12 | apoptosis |
| CYLD | apoptosis |
| CYP1B1 | apoptosis |
| DAB2IP | apoptosis |
| DAP | apoptosis |
| DAP3 | apoptosis |
| DAPK1 | apoptosis |
| DAPK3 | apoptosis |
| DAPL1 | apoptosis |
| DAXX | apoptosis |
| DBH | apoptosis |
| DDIAS | apoptosis |
| DDIT3 | apoptosis |
| DDIT4 | apoptosis |
| DDX3X | apoptosis |
| DDX47 | apoptosis |
| DDX5 | apoptosis |
| DEDD | apoptosis |
| DEDD2 | apoptosis |
| DELE1 | apoptosis |
| DEPTOR | apoptosis |
| DIDO1 | apoptosis |
| DNAJA1 | apoptosis |
| DNAJC10 | apoptosis |
| DNM1L | apoptosis |
| DPF2 | apoptosis |
| DYRK2 | apoptosis |
| E2F2 | apoptosis |
| EDA2R | apoptosis |
| EEF1E1 | apoptosis |
| EIF2AK3 | apoptosis |
| EIF5A | apoptosis |
| ELL3 | apoptosis |
| ENO1 | apoptosis |
| EPHA2 | apoptosis |
| EPO | apoptosis |
| ERBB3 | apoptosis |
| ERCC6 | apoptosis |
| ERN1 | apoptosis |
| ERN2 | apoptosis |
| ERO1A | apoptosis |
| ERP29 | apoptosis |
| EYA1 | apoptosis |
| EYA2 | apoptosis |
| EYA3 | apoptosis |
| EYA4 | apoptosis |
| FAF1 | apoptosis |
| FAIM | apoptosis |
| FAIM2 | apoptosis |
| FAM162A | apoptosis |
| FASTK | apoptosis |
| FBH1 | apoptosis |
| FBXW7 | apoptosis |
| FEM1B | apoptosis |
| FGA | apoptosis |
| FGB | apoptosis |
| FGF10 | apoptosis |
| FGFR1 | apoptosis |
| FGFR3 | apoptosis |
| FGG | apoptosis |
| FHIT | apoptosis |
| FIGNL1 | apoptosis |
| FIS1 | apoptosis |
| FLCN | apoptosis |
| FNIP2 | apoptosis |
| FOXO3 | apoptosis |
| FXN | apoptosis |
| FZD9 | apoptosis |
| G0S2 | apoptosis |
| GABARAP | apoptosis |
| GATA1 | apoptosis |
| GATA4 | apoptosis |
| GCLC | apoptosis |
| GCLM | apoptosis |
| GDNF | apoptosis |
| GFRAL | apoptosis |
| GGCT | apoptosis |
| GHITM | apoptosis |
| GNAI2 | apoptosis |
| GNAI3 | apoptosis |
| GPER1 | apoptosis |
| GPX1 | apoptosis |
| GRINA | apoptosis |
| GSDME | apoptosis |
| GSK3A | apoptosis |
| GSK3B | apoptosis |
| GSKIP | apoptosis |
| GSTP1 | apoptosis |
| HDAC1 | apoptosis |
| HELLS | apoptosis |
| HERPUD1 | apoptosis |
| HGF | apoptosis |
| HIC1 | apoptosis |
| HIF1A | apoptosis |
| HINT1 | apoptosis |
| HIP1 | apoptosis |
| HIP1R | apoptosis |
| HIPK1 | apoptosis |
| HIPK2 | apoptosis |
| HMGB2 | apoptosis |
| HMOX1 | apoptosis |
| HNRNPK | apoptosis |
| HRK | apoptosis |
| HSPA1A | apoptosis |
| HSPA1B | apoptosis |
| HTRA2 | apoptosis |
| HTT | apoptosis |
| HYAL2 | apoptosis |
| HYOU1 | apoptosis |
| ICAM1 | apoptosis |
| IFI16 | apoptosis |
| IFI27 | apoptosis |
| IFI27L1 | apoptosis |
| IFI27L2 | apoptosis |
| IFI6 | apoptosis |
| IFNB1 | apoptosis |
| IGF1 | apoptosis |
| IKBKE | apoptosis |
| IL12A | apoptosis |
| IL19 | apoptosis |
| IL2 | apoptosis |
| IL20RA | apoptosis |
| IL33 | apoptosis |
| IL4 | apoptosis |
| IL6R | apoptosis |
| IL7 | apoptosis |
| IL9 | apoptosis |
| ING2 | apoptosis |
| ING5 | apoptosis |
| INS | apoptosis |
| ITGA6 | apoptosis |
| ITGAM | apoptosis |
| ITGAV | apoptosis |
| ITM2C | apoptosis |
| ITPR1 | apoptosis |
| ITPRIP | apoptosis |
| IVNS1ABP | apoptosis |
| JAK2 | apoptosis |
| JMY | apoptosis |
| KDM1A | apoptosis |
| KITLG | apoptosis |
| LCK | apoptosis |
| LGALS12 | apoptosis |
| LGALS3 | apoptosis |
| LRRK2 | apoptosis |
| LTBR | apoptosis |
| MAEL | apoptosis |
| MAGEA3 | apoptosis |
| MAGED1 | apoptosis |
| MAL | apoptosis |
| MAP2K5 | apoptosis |
| MAP3K5 | apoptosis |
| MAPK7 | apoptosis |
| MAPK8 | apoptosis |
| MAPK8IP1 | apoptosis |
| MAPK8IP2 | apoptosis |
| MAPK9 | apoptosis |
| MARCHF7 | apoptosis |
| MAZ | apoptosis |
| MDM2 | apoptosis |
| MEIS3 | apoptosis |
| MELK | apoptosis |
| METTL21C | apoptosis |
| MFF | apoptosis |
| MIF | apoptosis |
| MIR132 | apoptosis |
| MIR15A | apoptosis |
| MIR16-1 | apoptosis |
| MIR17 | apoptosis |
| MIR186 | apoptosis |
| MIR198 | apoptosis |
| MIR21 | apoptosis |
| MIR210 | apoptosis |
| MIR221 | apoptosis |
| MIR222 | apoptosis |
| MIR26B | apoptosis |
| MIR27B | apoptosis |
| MIR449A | apoptosis |
| MKNK2 | apoptosis |
| MLH1 | apoptosis |
| MLLT11 | apoptosis |
| MMP9 | apoptosis |
| MNT | apoptosis |
| MOAP1 | apoptosis |
| MPV17L | apoptosis |
| MSH2 | apoptosis |
| MSH6 | apoptosis |
| MSX1 | apoptosis |
| MUC1 | apoptosis |
| MUL1 | apoptosis |
| NACC2 | apoptosis |
| NBN | apoptosis |
| NCK1 | apoptosis |
| NCK2 | apoptosis |
| NDUFA13 | apoptosis |
| NDUFS3 | apoptosis |
| NF1 | apoptosis |
| NFE2L2 | apoptosis |
| NGFR | apoptosis |
| NKX3-1 | apoptosis |
| NLE1 | apoptosis |
| NME5 | apoptosis |
| NMT1 | apoptosis |
| NOC2L | apoptosis |
| NOL3 | apoptosis |
| NONO | apoptosis |
| NOX1 | apoptosis |
| NR4A2 | apoptosis |
| NRP1 | apoptosis |
| NUPR1 | apoptosis |
| OPA1 | apoptosis |
| P2RX4 | apoptosis |
| P2RX7 | apoptosis |
| P4HB | apoptosis |
| PAK2 | apoptosis |
| PAK5 | apoptosis |
| PARK7 | apoptosis |
| PARL | apoptosis |
| PARP2 | apoptosis |
| PAWR | apoptosis |
| PDCD10 | apoptosis |
| PDCD5 | apoptosis |
| PDCD6 | apoptosis |
| PDE3A | apoptosis |
| PDIA3 | apoptosis |
| PDK1 | apoptosis |
| PDK2 | apoptosis |
| PDPK1 | apoptosis |
| PDX1 | apoptosis |
| PEA15 | apoptosis |
| PELI3 | apoptosis |
| PERP | apoptosis |
| PF4 | apoptosis |
| PHIP | apoptosis |
| PHLDA3 | apoptosis |
| PIAS4 | apoptosis |
| PIH1D1 | apoptosis |
| PINK1 | apoptosis |
| PLAGL2 | apoptosis |
| PLAUR | apoptosis |
| PLEKHF1 | apoptosis |
| PLSCR3 | apoptosis |
| PMAIP1 | apoptosis |
| PML | apoptosis |
| POLB | apoptosis |
| POU4F1 | apoptosis |
| POU4F2 | apoptosis |
| PPARD | apoptosis |
| PPIA | apoptosis |
| PPIF | apoptosis |
| PPM1F | apoptosis |
| PPP1CA | apoptosis |
| PPP1R13B | apoptosis |
| PPP1R15A | apoptosis |
| PRDX2 | apoptosis |
| PRELID1 | apoptosis |
| PRKCD | apoptosis |
| PRKDC | apoptosis |
| PRKN | apoptosis |
| PRKRA | apoptosis |
| PRODH | apoptosis |
| PSEN1 | apoptosis |
| PSMD10 | apoptosis |
| PTEN | apoptosis |
| PTGIS | apoptosis |
| PTH | apoptosis |
| PTPMT1 | apoptosis |
| PTPN1 | apoptosis |
| PTPN2 | apoptosis |
| PTPRC | apoptosis |
| PTTG1IP | apoptosis |
| PYCARD | apoptosis |
| QARS1 | apoptosis |
| QRICH1 | apoptosis |
| RACK1 | apoptosis |
| RAD9A | apoptosis |
| RB1 | apoptosis |
| RB1CC1 | apoptosis |
| RBCK1 | apoptosis |
| RET | apoptosis |
| RFFL | apoptosis |
| RHOT1 | apoptosis |
| RHOT2 | apoptosis |
| RIPK3 | apoptosis |
| RNF183 | apoptosis |
| RNF186 | apoptosis |
| RNF34 | apoptosis |
| RNF41 | apoptosis |
| RPL11 | apoptosis |
| RPL26 | apoptosis |
| RPS27L | apoptosis |
| RPS3 | apoptosis |
| RPS7 | apoptosis |
| RRM2B | apoptosis |
| RRN3 | apoptosis |
| RRP8 | apoptosis |
| RTKN2 | apoptosis |
| RTL10 | apoptosis |
| S100A8 | apoptosis |
| S100A9 | apoptosis |
| SCG2 | apoptosis |
| SCN2A | apoptosis |
| SCRT2 | apoptosis |
| SELENOK | apoptosis |
| SELENOS | apoptosis |
| SENP1 | apoptosis |
| SEPTIN4 | apoptosis |
| SERINC3 | apoptosis |
| SERPINE1 | apoptosis |
| SFN | apoptosis |
| SFPQ | apoptosis |
| SFRP1 | apoptosis |
| SFRP2 | apoptosis |
| SGK3 | apoptosis |
| SGMS1 | apoptosis |
| SGPL1 | apoptosis |
| SGPP1 | apoptosis |
| SH3RF1 | apoptosis |
| SHH | apoptosis |
| SHISA5 | apoptosis |
| SIAH1 | apoptosis |
| SIAH2 | apoptosis |
| SIRT1 | apoptosis |
| SIVA1 | apoptosis |
| SKIL | apoptosis |
| SLC25A31 | apoptosis |
| SLC25A4 | apoptosis |
| SLC25A5 | apoptosis |
| SLC25A6 | apoptosis |
| SLC35F6 | apoptosis |
| SLC9A3R1 | apoptosis |
| SLFN12 | apoptosis |
| SNAI1 | apoptosis |
| SNW1 | apoptosis |
| SOD1 | apoptosis |
| SOD2 | apoptosis |
| SORT1 | apoptosis |
| SP100 | apoptosis |
| SPI1 | apoptosis |
| SRPX | apoptosis |
| SST | apoptosis |
| SSTR3 | apoptosis |
| ST20 | apoptosis |
| STK24 | apoptosis |
| STK25 | apoptosis |
| STK3 | apoptosis |
| STK4 | apoptosis |
| STRADB | apoptosis |
| STX4 | apoptosis |
| STYXL1 | apoptosis |
| SYVN1 | apoptosis |
| TAF9 | apoptosis |
| TAF9B | apoptosis |
| TCF7L2 | apoptosis |
| TERT | apoptosis |
| TFPT | apoptosis |
| TICAM1 | apoptosis |
| TIMM50 | apoptosis |
| TIMP3 | apoptosis |
| TLR3 | apoptosis |
| TM2D1 | apoptosis |
| TMBIM1 | apoptosis |
| TMBIM6 | apoptosis |
| TMC8 | apoptosis |
| TMEM102 | apoptosis |
| TMEM109 | apoptosis |
| TMEM117 | apoptosis |
| TMEM14A | apoptosis |
| TMEM161A | apoptosis |
| TNFAIP3 | apoptosis |
| TNFRSF12A | apoptosis |
| TNFRSF1B | apoptosis |
| TNFRSF25 | apoptosis |
| TNFSF12 | apoptosis |
| TOPORS | apoptosis |
| TP53BP2 | apoptosis |
| TP63 | apoptosis |
| TP73 | apoptosis |
| TPD52L1 | apoptosis |
| TPT1 | apoptosis |
| TRAF1 | apoptosis |
| TRAF7 | apoptosis |
| TRAP1 | apoptosis |
| TREM2 | apoptosis |
| TRIAP1 | apoptosis |
| TRIB3 | apoptosis |
| TRIM32 | apoptosis |
| TRIM39 | apoptosis |
| TXNDC12 | apoptosis |
| TYROBP | apoptosis |
| UACA | apoptosis |
| UBB | apoptosis |
| UBE4B | apoptosis |
| UBQLN1 | apoptosis |
| UMOD | apoptosis |
| UNC5B | apoptosis |
| URI1 | apoptosis |
| USP28 | apoptosis |
| USP47 | apoptosis |
| VDAC2 | apoptosis |
| VNN1 | apoptosis |
| WFS1 | apoptosis |
| WNT4 | apoptosis |
| WWOX | apoptosis |
| XBP1 | apoptosis |
| YAP1 | apoptosis |
| YBX3 | apoptosis |
| ZC3HC1 | apoptosis |
| ZDHHC3 | apoptosis |
| ZMYND11 | apoptosis |
| ZNF205 | apoptosis |
| ZNF385A | apoptosis |
| ZNF385B | apoptosis |
| ZNF622 | apoptosis |
| ZSWIM2 | apoptosis |
| APPL1 | apoptosis |
| CCK | apoptosis |
| CD14 | apoptosis |
| CRH | apoptosis |
| DCC | apoptosis |
| INCA1 | apoptosis |
| JUN | apoptosis |
| KRT8 | apoptosis |
| LY96 | apoptosis |
| TFDP2 | apoptosis |
| TICAM2 | apoptosis |
| TLR4 | apoptosis |
| UBE2K | apoptosis |
| WDR35 | apoptosis |
| YWHAB | apoptosis |
| YWHAE | apoptosis |
| YWHAG | apoptosis |
| YWHAH | apoptosis |
| YWHAQ | apoptosis |
| YWHAZ | apoptosis |
| ANKRD13C | anoikis |
| BCL2 | anoikis |
| BCL2L1 | anoikis |
| BMF | anoikis |
| BRMS1 | anoikis |
| CAV1 | anoikis |
| CHEK2 | anoikis |
| CRYBA1 | anoikis |
| DAPK2 | anoikis |
| E2F1 | anoikis |
| IKBKG | anoikis |
| ITGA5 | anoikis |
| ITGB1 | anoikis |
| MAP3K7 | anoikis |
| MCL1 | anoikis |
| MYBBP1A | anoikis |
| NOTCH1 | anoikis |
| NTRK2 | anoikis |
| PDK4 | anoikis |
| PIK3CA | anoikis |
| PTK2 | anoikis |
| PTRH2 | anoikis |
| SIK1 | anoikis |
| SNAI2 | anoikis |
| SRC | anoikis |
| STK11 | anoikis |
| TFDP1 | anoikis |
| TLE1 | anoikis |
| TSC2 | anoikis |
| IKBKB | alkaliptosis |
| NFKB1 | alkaliptosis |
| CA9 | alkaliptosis |
| CHUK | alkaliptosis |
| IKBKG | alkaliptosis |
| RELA | alkaliptosis |
| NFKB1A | alkaliptosis |

| **Supplementary Table 2. Tumor-related gene signatures used in this study.** | | |  | |
| --- | --- | --- | --- | --- |
| **source** | **signature_name** | **associated genes** |  |
| MSigDB | Wong_SCs | RPL13, RPS8, HELLS, RCN2, DLGAP5, EMC8, POLE2, EIF3K, FGFR1, LSM4, RPS3, MRPL15, VRK1, HNRNPL, EIF4A1, KIF22, NUP107, PIPOX, HAUS1, THOC3, RFC3, NTHL1, CCNF, PPP4C, AURKB, PABPC1, HSPA14, MYBL2, FBL, CDCA7, HSPE1, MRPS30, MSH2, BUB1, CKAP2, GLDC, AK4, HMGN5, TERF1, EIF6, PSMD14, NDUFB8, ALDH7A1, RUVBL2, NAP1L1, RPS16, EBNA1BP2, MRPL37, DAP3, NDC80, MRPS36, G3BP1, NDUFB10, NHP2, TCF19, WEE1, RRM2, NDUFAB1, GTSE1, TIMM8A, CDCA8, RNPS1, PPM1G, UTP18, ETFA, KPNA6, HAT1, NEK2, RRM1, XRCC5, MRPL4, ZNF22, SLC16A1, HNRNPA1, NDUFB7, PHF5A, PUS1, MAPK13, FDPS, NUDCD2, BANF1, GNL3, RCC1, MCM5, CKS1B, CCNA2, RCC2, NONO, CDC34, LMNB1, DNMT1, MRPS28, FARSA, POLR2F, CLPP, DLAT, TEAD2, PSMA7, MRPL13, NCL, ELOVL6, HADH, SNRPA1, DPP3, PRIM2, PHC1, SOX2, CRABP2, PRMT3, RPS27, MRPL16, TP53, PSME3, NDUFS2, YAP1, NOP2, ATP5PO, GLO1, ECHS1, EIF4B, DBF4, HMGB2, ANP32E, PRMT1, MID1IP1, MCM2, CDC6, MCM3, U2AF1, POLR3K, RPS19, SRSF10, MAIP1, SS18, IARS1, PROM1, SMC2, UQCRH, ATP5PF, PSMB6, UQCR11, SNX5, AMOTL2, LBHD1, MYC, ENO1, SDHC, HDAC1, LSM10, RPL10A, DHX9, CISD1, UBE2V2, KIF20A, CCT5, PLK4, AURKA, ADH5, SDHD, CHAF1A, TGIF1, TTK, KIF11, RPS12, RPS5, SLC25A5, EIF4EBP1, EIF3I, GNA14, ABCB7, TCOF1, RUVBL1, VBP1, EEF2, DTYMK, PRDX1, SUMO1, CDK1, RAD18, SLC2A1, BIRC5, PCNA, TCF7L1, MRTO4, EIF2S2, LSM5, CCNC, SEPHS2, TRIP6, KIF4A, CTSC, MRPL39, TIMM8B, CDC20, MTF2, BLM, NIP7, BAX, PSMA5, TMEFF1, ALDOC, NOP10, TIMM44, ZIC3, MRPS18B, NIPSNAP1, PA2G4, KRAS, LYPLA1, BCAT1, SNRNP40, DEK, OTX2, CYCS, NDUFA11, CDC7, NCAPD2, GARS1, NME2, ERCC6L, ERP29, EIF3A, CBX3, WBP11, RACGAP1, PLK1, NLN, CDKN1C, NCAPH, DDX18, GSPT2, HNRNPK, SET, MAD2L1, NCBP2, PARP1, PDHA1, SNRPA, EIF3L, CDK4, FH, EXO1, YY1, XPO1, CCND1, IPO9, UGDH, KPNA2, FAM136A, NIFK, CDCA5, PRPS1, CSE1L, E2F3, CSRP2, TRIP13, MTHFD2, NUSAP1, NDUFA9, MRPL12, GNPDA1, PSMB5, PRIM1, LSM2, JPT1, NASP, SSB, CHEK2, BTF3, GART, SMC4, RPL22, CCND2, PHB, RPSA, RPS23, MCM7, GEMIN2, NT5DC2, MRPS2, RPP40, SARS1, PDIA4, UBE2G1, EIF2S3, WDHD1, CTNNA1, DARS2, TGIF2, COX5B, CDCA3, MRPS17, ORC1, GMNN, TIMM13, GJA1, STIP1, HSPA9, POP7, KIF23, GEMIN6, RPA3, RPA2, EXOSC7, CHEK1, RPL27A, CDKN3, BUB1B, HNRNPAB, SNRPD1, NME4, RAB34, BRIX1, EEF1E1, COQ3, APEX1, RAD23B, WDR77, ACAD8, MRPL11, TOP2A, SERPINH1, STOML2, CCNB2, MCM4, CKS2, BUB3, PDCD2, SPAG5, PDPN, POLD1, DTL, SINHCAF, ADSL, SQLE |  |
| PMID: 31061129 | 2019_PNAS_stemness | DNMT3B, PFAS, XRCC5, HAUS6, TET1, IGF2BP1, PLAA, TEX10, MSH6, DLGAP5, SKIV2L2, SOHLH2, RRAS2, PAICS, CPSF3, LIN28B, IPO5, BMPR1A, ZNF788, ASCC3, FANCB, HMGA2, TRIM24, ORC1, HDAC2, HESX1, INHBE, MIS18A, DCUN1D5, MRPL3, CENPH, MYCN, HAUS1, GDF3, TBCE, RIOK2, BCKDHB, RAD1, NREP, ADH5, PLRG1, ROR1, RAB3B, DIAPH3, GNL2, FGF2, NMNAT2, KIF20A, CENPI, DDX1, XXYLT1, GPR176, BBS9, C14orf166, BOD1, CDC123, SNRPD3, FAM118B, DPH3, EIF2B3, RPF2, APLP1, DACT1, PDHB, C14orf119, DTD1, SAMM50, CCL26, MED20, UTP6, RARS2, ARMCX2, RARS, MTHFD2, DHX15, HTR7, MTHFD1L, ARMC9, XPOT, IARS, HDX, ACTRT3, ERCC2, TBC1D16, GARS, KIF7, UBE2K, SLC25A3, ICMT, UGGT2, ATP11C, SLC24A1, EIF2AK4, GPX8, ALX1, OSTC, TRPC4, HAS2, FZD2, TRNT1, MMADHC, SNX8, CDH6, HAT1, SEC11A, DIMT1, TM2D2, FST, GBE1 |  |
| PMID: 22361632 | Cell_cycle_progression | FOXM1, CDC20, CDKN3, CDC2, KIF11, KIAA0101, NUSAP1, CENPF, ASPM, BUB1B, RRM2, DLGAP5, BIRC5, KIF20A, PLK1, TOP2A, TK1, PBK, ASF1B, C18orf24, RAD54L, PTTG1, CDCA3, MCM10, PRC1, DTL, CEP55, RAD51, CENPM, CDCA8, ORC6L |  |
| PMID: 34019806 | Tumor_Proliferation_Rate | MKI67, ESCO2, CETN3, CDK2, CCND1, CCNE1, AURKA, AURKB, E2F1, MYBL2, BUB1, PLK1, CCNB1, MCM2, MCM6 |  |
| PMID: 24520177 | EMT1 | CLDN3, CLDN7, CLDN4, CDH1, VIM, TWIST1, ZEB1, ZEB2 |  |
| PMID: 26997480 | EMT2 | AXL, FAP, LOXL2, ROR2, TAGLN, TWIST2, WNT5A |  |
| PMID: 34019806 | EMT_signature | SNAI1, SNAI2, TWIST1, TWIST2, ZEB1, ZEB2, CDH2 |  |
| PMID: 30842092 | TGFβ/EMT pathway | VIM, ACTA2, COL4A1, TGFBR2, ZEB1, CLDN3, SMAD9, TWIST1, TGRB1 |  |
| PMID: 29443960 | Pan-F-TBRS | ACTA2, ACTG2, ADAM12, ADAM19, CNN1, COL4A1, CTGF, CTPS1, FAM101B, FSTL3, HSPB1, IGFBP3, PXDC1, SEMA7A, SH3PXD2A, TAGLN, TGFBI, TNS1, TPM1 |  |
| PMID: 22553347 | Angiogenesis | CDH5, SOX17, SOX18, TEK |  |
| PMID: 34019806 | Endothelium | NOS3, KDR, FLT1, VCAM1, VWF, CDH5, MMRN1, ENG, CLEC14A, MMRN2 |  |
| PMID: 34019806 | Cancer_associated_fibroblasts | COL1A1, COL1A2, COL5A1, ACTA2, FGF2, FAP, LRP1, CD248, COL6A1, COL6A2, COL6A3, CXCL12, FBLN1, LUM, MFAP5, MMP3, MMP2, PDGFRB, PDGFRA |  |
| PMID: 34019806 | Matrix | FN1, COL1A1, COL1A2, COL4A1, COL3A1, VTN, LGALS7, LGALS9, LAMA3, LAMB3, LAMC2, TNC, ELN, COL5A1, COL11A1 |  |
| PMID: 30842092 | DNA_damage_repair | ALKBH2, ALKBH3, APEX1, APEX2, APLF, ATM, ATR, ATRIP, BLM, BRCA1, BRCA2, BRIP1, CCNH, CDK7, CETN2, CHAF1A, CHEK1, CHEK2, CLK2, DCLRE1C, DDB1, DDB2, DUT, ENDOV, ERCC1, ERCC2, ERCC3, ERCC4, ERCC5, ERCC6, ERCC8, FAN1, FANCA, FANCB, FANCC, FANCD2, FANCE, FANCF, FANCG, FANCL, FANCM, GTF2H1, GTF2H2, GTF2H3, GTF2H4, GTF2H5, H2AFX, HLTF, HUS1, LIG1, LIG3, LIG4, MBD4, MDC1, MGMT, MLH1, MLH3, MMS19, MNAT1, MPG, MSH2, MSH3, MSH4, MSH5, MSH6, MUTYH, NEIL1, NEIL2, NEIL3, NHEJ1, NTHL1, NUDT1, OGG1, PALB2, PARP1, PARP2, PARP3, PCNA, PER1, PMS1, PMS2, PNKP, POLB, POLD1, POLE, POLG, POLH, POLL, POLM, POLQ, PRKDC, RAD1, RAD17, RAD18, RAD23A, RAD23B, RAD51C, RAD9A, RECQL4, RECQL5, RIF1, RNF168, RNF4, RNF8, RPA1, RPA2, RPA3, RPA4, RRM2B, SETMAR, SHPRH, SMUG1, TDP1, TDP2, TOPBP1, TP53, TREX1, UBE2A, UBE2B, UBE2N, UBE2V2, UNG, UVSSA, WRN, XAB2, XPA, XPC, XRCC1, XRCC4, XRCC5, XRCC6 |  |
| PMID: 26855148 | AR_signaling | MPHOSPH9, ADAM7, FOLH1, CD200, FKBP5, GLRA2, NDRG1, CAMKK2, MAN1A1, MED28, ELL2, ACSL3, PMEPA1, GNMT, ABCC4, HERC3, PIP4K2B, KLK3, EAF2, CENPN, MAPRE2, NKX3-1, KLK2, AR, TNK1, MAF, C1ORF116, TMPRSS2, TBC1D9B, ZBTB10 |  |
| MSigDB | p53 signaling pathway | CCNB2, CCNE1, CCNE2, CDK1, CDK2, CDKN2A, GSTE1, PPM1D, PFWD2, RRM2 |  |
| MSigDB | RAMALHO_Stemness_UP | ZC3H14, RRN3, MPDU1, TXNDC9, ZNF644, MTMR10, TGS1, ZMAT3, UPP1, RCL1, STXBP3, COPS4, RAD23B, YWHAB, SMAD1, GLO1, BLZF1, PPP2R1B, ZNF101, BPNT2, LRRC58, YWHAH, USP10, SRSF6, URI1, CHD1, FASTKD5, TJP1, GARS1, MAP4K3, ROCK2, GAS2, SLC38A2, BACH1, SH3D19, DTYMK, SLC7A6, NIFK, YAP1, SUCLG2, FCF1, ZFX, LIG3, RIDA, ERCC5, LAS1L, GAB1, FBXO8, PACRGL, MDFIC, MRPS31, SAPCD1, PDCD2, FKBP11, LIMA1, ARCN1, UBE2T, MRPL45, RNFT1, ALDH7A1, LAPTM4A, UMPS, DICER1, CENPC, CDK2AP1, PSMD12, GRWD1, NDUFAF4, PPIC, MRPL17, MPHOSPH10, CRTAP, STAM, TEAD2, ZNF213, PCF11, XPO1, RYK, EIF3J, NOP58, GCAT, CPXM1, XRCC5, IARS2, COPRS, SRSF3, UTP4, RABGGTB, JAGN1, MDFI, PRPF6, MRPL34, PAFAH2, ZMYM4, TBC1D15, ZZZ3, LAPTM4B, MRPS2, CCND1, TCEAL9, GHR, ESF1, TGIF2-RAB5IF, DNAJB6, PSMD11, SEC23IP, MTERF3, TBRG4, ELOVL6, KCNAB3, EPRS1, SLC4A7, NUP35, ANKRD17, ACADM, RAB18, UTP20, TARS2, RARS2, TXNRD1, MARCHF7, USP9X, WDR43, PPP1R2, PTPN2, ELP2, RPP14, SEC23A, CTBP2, RPL22, SNX12, BYSL, RNF145, PLS3, ITGB1, C12orf45, ACAT2, RSRC2, PHTF2, FBXO38, RPUSD4, PRPSAP1, COPS7A, ARIH1, SMAD2, PPA1, RASA1, ZCCHC10, GCLM, CDKN1A, FHL1, EIF4G2, TOM1L1, TBRG1, F2R, PIGX, SMARCAD1, XPOT, INTS5, PLA2G6, TRIP6, LSG1, ZNF281, PKD2, CTTN, GSTA1, SNRPC, GFER, WDR55, DCTPP1, ZNF639, KANK3, CWC22, RNF138, MRPS10, IARS1, RNF4, RSL1D1, EIF4EBP1, TMEM183A, GNL2, FKBP9, SOCS2, C5orf51, RCN1, GNB1, ITGA6, GCSH, PEX7, MED23, ADAM9, LSM2, KIF2A, KRAS, ABCB1, YES1, DPH5 |  |
| KEGG:hsa04060 | Cytokine-cytokine receptor interaction | ACVR1, CCL24, FLT4, IFNGR1, IL4R, IL6ST, KIT, LIF, PDGFA, PDGFRB, TGFB1, TGFBR2, TNFRSF10B, TNFRSF14, TNFRSF1A |  |

| **Supplementary Table 3. Metabolic and immune-related signatures used in this study.** | |
| --- | --- |
| **signature_name** | **gene** |
| BCAA metabolism | BCAT2 |
| BCAA metabolism | DLD |
| BCAA metabolism | ACAT1 |
| BCAA metabolism | AUH |
| BCAA metabolism | MCCC1 |
| BCAA metabolism | ACAD8 |
| BCAA metabolism | IVD |
| BCAA metabolism | BCKDHA |
| BCAA metabolism | MCCC2 |
| BCAA metabolism | BABT |
| BCAA metabolism | DBT |
| BCAA metabolism | HMGCLL1 |
| BCAA metabolism | PPM1K |
| BCAA metabolism | BCAT1 |
| BCAA metabolism | ALDH6A1 |
| BCAA metabolism | ACADSB |
| BCAA metabolism | BCKDK |
| BCAA metabolism | HSD17B10 |
| BCAA metabolism | ECHS1 |
| BCAA metabolism | BCKDHB |
| BCAA metabolism | ACAT2 |
| BCAA metabolism | SLC25A44 |
| BCAA metabolism | HIBCH |
| BCAA metabolism | HIBADH |
| BCAA metabolism | HADHA |
| BCAA metabolism | HMGCL |
| LMRG metabolism | MYC |
| LMRG metabolism | TP53 |
| LMRG metabolism | SLC16A1 |
| LMRG metabolism | SCO2 |
| LMRG metabolism | SLC19A1 |
| LMRG metabolism | LDHA |
| LMRG metabolism | HMOX1 |
| LMRG metabolism | MDH2 |
| LMRG metabolism | PDHA1 |
| LMRG metabolism | TET2 |
| LMRG metabolism | GATA2 |
| LMRG metabolism | RRM2B |
| LMRG metabolism | TK2 |
| Glycolysis | AAAS |
| Glycolysis | NUP188 |
| Glycolysis | RAE1 |
| Glycolysis | PGK1 |
| Glycolysis | NUP93 |
| Glycolysis | PPP2CB |
| Glycolysis | GPI |
| Glycolysis | PPP2R1A |
| Glycolysis | GAPDHS |
| Glycolysis | GCK |
| Glycolysis | ENO3 |
| Glycolysis | NUP88 |
| Glycolysis | ALDOC |
| Glycolysis | NUP98 |
| Glycolysis | NUP107 |
| Glycolysis | GAPDH |
| Glycolysis | TPI1 |
| Glycolysis | ENO2 |
| Glycolysis | PPP2R5D |
| Glycolysis | GNPDA1 |
| Glycolysis | NUP155 |
| Glycolysis | PPP2CA |
| Glycolysis | PFKFB4 |
| Glycolysis | NUP43 |
| Glycolysis | PFKFB2 |
| Glycolysis | NUP153 |
| Glycolysis | NUP85 |
| Glycolysis | NUP214 |
| Glycolysis | NUP210 |
| Glycolysis | NUP42 |
| Glycolysis | ALDOB |
| Glycolysis | PPP2R1B |
| Glycolysis | NUP54 |
| Glycolysis | NUP58 |
| Glycolysis | PFKL |
| Glycolysis | PRKACB |
| Glycolysis | PKLR |
| Glycolysis | ALDOA |
| Glycolysis | PFKM |
| Glycolysis | RANBP2 |
| Glycolysis | NUP205 |
| Glycolysis | HK1 |
| Glycolysis | SEC13 |
| Glycolysis | PFKFB1 |
| Glycolysis | ADPGK |
| Glycolysis | HK2 |
| Glycolysis | HK3 |
| Glycolysis | NUP35 |
| Glycolysis | GNPDA2 |
| Glycolysis | PGAM2 |
| Glycolysis | PRKACG |
| Glycolysis | PGM2L1 |
| Glycolysis | PFKFB3 |
| Glycolysis | PGK2 |
| Glycolysis | PGAM1 |
| Glycolysis | BPGM |
| Glycolysis | PGP |
| Glycolysis | POM121 |
| Glycolysis | NUP62 |
| Glycolysis | PKLR |
| Glycolysis | POM121C |
| Glycolysis | PRKACA |
| Cholesterol | ACAT2 |
| Cholesterol | ARV1 |
| Cholesterol | CYP51A1 |
| Cholesterol | DHCR24 |
| Cholesterol | DHCR7 |
| Cholesterol | EBP |
| Cholesterol | FDFT1 |
| Cholesterol | FDPS |
| Cholesterol | GGPS1 |
| Cholesterol | HMGCR |
| Cholesterol | HMGCS1 |
| Cholesterol | HSD17B7 |
| Cholesterol | IDI1 |
| Cholesterol | IDI2 |
| Cholesterol | LBR |
| Cholesterol | LSS |
| Cholesterol | MSMO1 |
| Cholesterol | MVD |
| Cholesterol | MVK |
| Cholesterol | NSDHL |
| Cholesterol | PLPP6 |
| Cholesterol | PMVK |
| Cholesterol | SC5D |
| Cholesterol | SQLE |
| Cholesterol | SREBF1 |
| Cholesterol | SREBF2 |
| Cholesterol | TM7SF2 |
| Cholesterol | NUP160 |
| Cholesterol | TPR |
| Cholesterol | NDC1 |
| Cholesterol | PFKP |
| Cholesterol | PKM |
| Cholesterol | NUP133 |
| Cholesterol | PRKACA |
| Cholesterol | ENO1 |
| Cholesterol | NUP37 |
| Cholesterol | GCKR |
| Cholesterol | SEH1L |
| Cholesterol | NUP50 |
| NK cell mediated cytotoxicity | HLA-A |
| NK cell mediated cytotoxicity | HLA-B |
| NK cell mediated cytotoxicity | HLA-C |
| NK cell mediated cytotoxicity | HLA-G |
| NK cell mediated cytotoxicity | HLA-E |
| NK cell mediated cytotoxicity | KIR3DL2 |
| NK cell mediated cytotoxicity | KIR3DL1 |
| NK cell mediated cytotoxicity | KIR3DL3 |
| NK cell mediated cytotoxicity | KIR2DL2 |
| NK cell mediated cytotoxicity | KIR2DL1 |
| NK cell mediated cytotoxicity | KIR2DL3 |
| NK cell mediated cytotoxicity | KIR2DL5A |
| NK cell mediated cytotoxicity | KLRC1 |
| NK cell mediated cytotoxicity | KLRD1 |
| NK cell mediated cytotoxicity | PTPN6 |
| NK cell mediated cytotoxicity | PTPN11 |
| NK cell mediated cytotoxicity | ICAM1 |
| NK cell mediated cytotoxicity | ICAM2 |
| NK cell mediated cytotoxicity | ITGAL |
| NK cell mediated cytotoxicity | ITGB2 |
| NK cell mediated cytotoxicity | PTK2B |
| NK cell mediated cytotoxicity | VAV3 |
| NK cell mediated cytotoxicity | VAV1 |
| NK cell mediated cytotoxicity | VAV2 |
| NK cell mediated cytotoxicity | RAC1 |
| NK cell mediated cytotoxicity | RAC2 |
| NK cell mediated cytotoxicity | RAC3 |
| NK cell mediated cytotoxicity | PAK1 |
| NK cell mediated cytotoxicity | MAP2K1 |
| NK cell mediated cytotoxicity | MAP2K2 |
| NK cell mediated cytotoxicity | MAPK1 |
| NK cell mediated cytotoxicity | MAPK3 |
| NK cell mediated cytotoxicity | TNF |
| NK cell mediated cytotoxicity | CSF2 |
| NK cell mediated cytotoxicity | IFNG |
| NK cell mediated cytotoxicity | KIR2DS1 |
| NK cell mediated cytotoxicity | KIR2DS3 |
| NK cell mediated cytotoxicity | KIR2DS4 |
| NK cell mediated cytotoxicity | KIR2DS5 |
| NK cell mediated cytotoxicity | KIR2DS2 |
| NK cell mediated cytotoxicity | KLRC2 |
| NK cell mediated cytotoxicity | KLRC3 |
| NK cell mediated cytotoxicity | NCR2 |
| NK cell mediated cytotoxicity | TYROBP |
| NK cell mediated cytotoxicity | LCK |
| NK cell mediated cytotoxicity | IGH |
| NK cell mediated cytotoxicity | FCGR3A |
| NK cell mediated cytotoxicity | FCGR3B |
| NK cell mediated cytotoxicity | NCR1 |
| NK cell mediated cytotoxicity | NCR3 |
| NK cell mediated cytotoxicity | FCER1G |
| NK cell mediated cytotoxicity | CD247 |
| NK cell mediated cytotoxicity | ZAP70 |
| NK cell mediated cytotoxicity | SYK |
| NK cell mediated cytotoxicity | LCP2 |
| NK cell mediated cytotoxicity | LAT |
| NK cell mediated cytotoxicity | PLCG1 |
| NK cell mediated cytotoxicity | PLCG2 |
| NK cell mediated cytotoxicity | SH3BP2 |
| NK cell mediated cytotoxicity | PIK3CA |
| NK cell mediated cytotoxicity | PIK3CD |
| NK cell mediated cytotoxicity | PIK3CB |
| NK cell mediated cytotoxicity | PIK3R1 |
| NK cell mediated cytotoxicity | PIK3R2 |
| NK cell mediated cytotoxicity | PIK3R3 |
| NK cell mediated cytotoxicity | FYN |
| NK cell mediated cytotoxicity | SHC1 |
| NK cell mediated cytotoxicity | SHC2 |
| NK cell mediated cytotoxicity | SHC3 |
| NK cell mediated cytotoxicity | SHC4 |
| NK cell mediated cytotoxicity | GRB2 |
| NK cell mediated cytotoxicity | SOS1 |
| NK cell mediated cytotoxicity | SOS2 |
| NK cell mediated cytotoxicity | HRAS |
| NK cell mediated cytotoxicity | KRAS |
| NK cell mediated cytotoxicity | NRAS |
| NK cell mediated cytotoxicity | ARAF |
| NK cell mediated cytotoxicity | BRAF |
| NK cell mediated cytotoxicity | RAF1 |
| NK cell mediated cytotoxicity | MICB |
| NK cell mediated cytotoxicity | MICA |
| NK cell mediated cytotoxicity | ULBP1 |
| NK cell mediated cytotoxicity | ULBP2 |
| NK cell mediated cytotoxicity | ULBP3 |
| NK cell mediated cytotoxicity | KLRK1 |
| NK cell mediated cytotoxicity | KLRC4-KLRK1 |
| NK cell mediated cytotoxicity | HCST |
| NK cell mediated cytotoxicity | CD48 |
| NK cell mediated cytotoxicity | CD244 |
| NK cell mediated cytotoxicity | PPP3CA |
| NK cell mediated cytotoxicity | PPP3CB |
| NK cell mediated cytotoxicity | PPP3CC |
| NK cell mediated cytotoxicity | PPP3R1 |
| NK cell mediated cytotoxicity | PPP3R2 |
| NK cell mediated cytotoxicity | NFATC1 |
| NK cell mediated cytotoxicity | NFATC2 |
| NK cell mediated cytotoxicity | PRKCA |
| NK cell mediated cytotoxicity | PRKCB |
| NK cell mediated cytotoxicity | PRKCG |
| NK cell mediated cytotoxicity | SH2D1B |
| NK cell mediated cytotoxicity | SH2D1A |
| NK cell mediated cytotoxicity | IFNGR1 |
| NK cell mediated cytotoxicity | IFNGR2 |
| NK cell mediated cytotoxicity | IFNA1 |
| NK cell mediated cytotoxicity | IFNA2 |
| NK cell mediated cytotoxicity | IFNA4 |
| NK cell mediated cytotoxicity | IFNA5 |
| NK cell mediated cytotoxicity | IFNA6 |
| NK cell mediated cytotoxicity | IFNA7 |
| NK cell mediated cytotoxicity | IFNA8 |
| NK cell mediated cytotoxicity | IFNA10 |
| NK cell mediated cytotoxicity | IFNA13 |
| NK cell mediated cytotoxicity | IFNA14 |
| NK cell mediated cytotoxicity | IFNA16 |
| NK cell mediated cytotoxicity | IFNA17 |
| NK cell mediated cytotoxicity | IFNA21 |
| NK cell mediated cytotoxicity | IFNB1 |
| NK cell mediated cytotoxicity | IFNAR1 |
| NK cell mediated cytotoxicity | IFNAR2 |
| NK cell mediated cytotoxicity | TNFSF10 |
| NK cell mediated cytotoxicity | TNFRSF10A |
| NK cell mediated cytotoxicity | TNFRSF10B |
| NK cell mediated cytotoxicity | FASLG |
| NK cell mediated cytotoxicity | FAS |
| NK cell mediated cytotoxicity | GZMB |
| NK cell mediated cytotoxicity | PRF1 |
| NK cell mediated cytotoxicity | CASP3 |
| NK cell mediated cytotoxicity | BID |
| NK cell mediated cytotoxicity | RAET1G |
| NK cell mediated cytotoxicity | RAET1L |
| NK cell mediated cytotoxicity | RAET1E |
| Antigen processing and presentation | IFNG |
| Antigen processing and presentation | TNF |
| Antigen processing and presentation | PSME1 |
| Antigen processing and presentation | PSME2 |
| Antigen processing and presentation | PSME3 |
| Antigen processing and presentation | HSPA8 |
| Antigen processing and presentation | HSPA1A |
| Antigen processing and presentation | HSPA2 |
| Antigen processing and presentation | HSPA1L |
| Antigen processing and presentation | HSPA1B |
| Antigen processing and presentation | HSPA6 |
| Antigen processing and presentation | HSPA4 |
| Antigen processing and presentation | HSP90AA1 |
| Antigen processing and presentation | HSP90AB1 |
| Antigen processing and presentation | HLA-A |
| Antigen processing and presentation | HLA-B |
| Antigen processing and presentation | HLA-C |
| Antigen processing and presentation | HLA-F |
| Antigen processing and presentation | HLA-G |
| Antigen processing and presentation | HLA-E |
| Antigen processing and presentation | HSPA5 |
| Antigen processing and presentation | CANX |
| Antigen processing and presentation | B2M |
| Antigen processing and presentation | PDIA3 |
| Antigen processing and presentation | CALR |
| Antigen processing and presentation | TAPBP |
| Antigen processing and presentation | TAP1 |
| Antigen processing and presentation | TAP2 |
| Antigen processing and presentation | CD8A |
| Antigen processing and presentation | CD8B |
| Antigen processing and presentation | CD8B2 |
| Antigen processing and presentation | KIR3DL2 |
| Antigen processing and presentation | KIR3DL1 |
| Antigen processing and presentation | KIR3DL3 |
| Antigen processing and presentation | KIR2DL2 |
| Antigen processing and presentation | KIR2DL1 |
| Antigen processing and presentation | KIR2DL3 |
| Antigen processing and presentation | KIR2DL4 |
| Antigen processing and presentation | KIR2DL5A |
| Antigen processing and presentation | KLRC1 |
| Antigen processing and presentation | KLRC2 |
| Antigen processing and presentation | KLRC3 |
| Antigen processing and presentation | KLRC4 |
| Antigen processing and presentation | KLRD1 |
| Antigen processing and presentation | KIR2DS1 |
| Antigen processing and presentation | KIR2DS3 |
| Antigen processing and presentation | KIR2DS4 |
| Antigen processing and presentation | KIR2DS5 |
| Antigen processing and presentation | KIR2DS2 |
| Antigen processing and presentation | IFI30 |
| Antigen processing and presentation | LGMN |
| Antigen processing and presentation | CTSB |
| Antigen processing and presentation | HLA-DMA |
| Antigen processing and presentation | HLA-DMB |
| Antigen processing and presentation | HLA-DOA |
| Antigen processing and presentation | HLA-DOB |
| Antigen processing and presentation | HLA-DPA1 |
| Antigen processing and presentation | HLA-DPB1 |
| Antigen processing and presentation | HLA-DQA1 |
| Antigen processing and presentation | HLA-DQA2 |
| Antigen processing and presentation | HLA-DQB1 |
| Antigen processing and presentation | HLA-DRA |
| Antigen processing and presentation | HLA-DRB1 |
| Antigen processing and presentation | HLA-DRB3 |
| Antigen processing and presentation | HLA-DRB4 |
| Antigen processing and presentation | HLA-DRB5 |
| Antigen processing and presentation | CD74 |
| Antigen processing and presentation | CTSL |
| Antigen processing and presentation | CTSS |
| Antigen processing and presentation | CD4 |
| Antigen processing and presentation | CIITA |
| Antigen processing and presentation | RFX5 |
| Antigen processing and presentation | RFXANK |
| Antigen processing and presentation | RFXAP |
| Antigen processing and presentation | CREB1 |
| Antigen processing and presentation | NFYA |
| Antigen processing and presentation | NFYB |
| Antigen processing and presentation | NFYC |
| T cell receptor signaling | CD3D |
| T cell receptor signaling | CD3E |
| T cell receptor signaling | CD3G |
| T cell receptor signaling | CD247 |
| T cell receptor signaling | CD4 |
| T cell receptor signaling | CD8A |
| T cell receptor signaling | CD8B |
| T cell receptor signaling | CD8B2 |
| T cell receptor signaling | PTPRC |
| T cell receptor signaling | LCK |
| T cell receptor signaling | FYN |
| T cell receptor signaling | ZAP70 |
| T cell receptor signaling | LCP2 |
| T cell receptor signaling | LAT |
| T cell receptor signaling | ITK |
| T cell receptor signaling | TEC |
| T cell receptor signaling | NCK1 |
| T cell receptor signaling | NCK2 |
| T cell receptor signaling | VAV3 |
| T cell receptor signaling | VAV1 |
| T cell receptor signaling | VAV2 |
| T cell receptor signaling | GRAP2 |
| T cell receptor signaling | GRB2 |
| T cell receptor signaling | PAK1 |
| T cell receptor signaling | PAK2 |
| T cell receptor signaling | PAK3 |
| T cell receptor signaling | PAK4 |
| T cell receptor signaling | PAK5 |
| T cell receptor signaling | PAK6 |
| T cell receptor signaling | BUB1B-PAK6 |
| T cell receptor signaling | RHOA |
| T cell receptor signaling | CDC42 |
| T cell receptor signaling | DLG1 |
| T cell receptor signaling | MAPK11 |
| T cell receptor signaling | MAPK12 |
| T cell receptor signaling | MAPK13 |
| T cell receptor signaling | MAPK14 |
| T cell receptor signaling | PLCG1 |
| T cell receptor signaling | PPP3CA |
| T cell receptor signaling | PPP3CB |
| T cell receptor signaling | PPP3CC |
| T cell receptor signaling | PPP3R1 |
| T cell receptor signaling | PPP3R2 |
| T cell receptor signaling | NFATC1 |
| T cell receptor signaling | NFATC2 |
| T cell receptor signaling | NFATC3 |
| T cell receptor signaling | SOS1 |
| T cell receptor signaling | SOS2 |
| T cell receptor signaling | RASGRP1 |
| T cell receptor signaling | HRAS |
| T cell receptor signaling | KRAS |
| T cell receptor signaling | NRAS |
| T cell receptor signaling | RAF1 |
| T cell receptor signaling | MAP2K1 |
| T cell receptor signaling | MAP2K2 |
| T cell receptor signaling | MAPK1 |
| T cell receptor signaling | MAPK3 |
| T cell receptor signaling | FOS |
| T cell receptor signaling | JUN |
| T cell receptor signaling | PRKCQ |
| T cell receptor signaling | CARD11 |
| T cell receptor signaling | BCL10 |
| T cell receptor signaling | MALT1 |
| T cell receptor signaling | MAP3K7 |
| T cell receptor signaling | MAP2K7 |
| T cell receptor signaling | MAPK8 |
| T cell receptor signaling | MAPK10 |
| T cell receptor signaling | MAPK9 |
| T cell receptor signaling | CHUK |
| T cell receptor signaling | IKBKB |
| T cell receptor signaling | IKBKG |
| T cell receptor signaling | NFKB1 |
| T cell receptor signaling | RELA |
| T cell receptor signaling | NFKBIA |
| T cell receptor signaling | NFKBIB |
| T cell receptor signaling | NFKBIE |
| T cell receptor signaling | CD28 |
| T cell receptor signaling | ICOS |
| T cell receptor signaling | CD40LG |
| T cell receptor signaling | PIK3R1 |
| T cell receptor signaling | PIK3R2 |
| T cell receptor signaling | PIK3R3 |
| T cell receptor signaling | PIK3CA |
| T cell receptor signaling | PIK3CD |
| T cell receptor signaling | PIK3CB |
| T cell receptor signaling | PDPK1 |
| T cell receptor signaling | AKT1 |
| T cell receptor signaling | AKT2 |
| T cell receptor signaling | AKT3 |
| T cell receptor signaling | MAP3K8 |
| T cell receptor signaling | MAP3K14 |
| T cell receptor signaling | GSK3B |
| T cell receptor signaling | PDCD1 |
| T cell receptor signaling | CTLA4 |
| T cell receptor signaling | PTPN6 |
| T cell receptor signaling | CBLB |
| T cell receptor signaling | IL2 |
| T cell receptor signaling | IL4 |
| T cell receptor signaling | IL5 |
| T cell receptor signaling | IL10 |
| T cell receptor signaling | IFNG |
| T cell receptor signaling | CSF2 |
| T cell receptor signaling | TNF |
| T cell receptor signaling | CDK4 |
| B cell receptor signaling | IGH |
| B cell receptor signaling | CD79A |
| B cell receptor signaling | CD79B |
| B cell receptor signaling | LYN |
| B cell receptor signaling | SYK |
| B cell receptor signaling | BTK |
| B cell receptor signaling | DAPP1 |
| B cell receptor signaling | BLNK |
| B cell receptor signaling | VAV3 |
| B cell receptor signaling | VAV1 |
| B cell receptor signaling | VAV2 |
| B cell receptor signaling | RAC1 |
| B cell receptor signaling | RAC2 |
| B cell receptor signaling | RAC3 |
| B cell receptor signaling | PLCG2 |
| B cell receptor signaling | PPP3CA |
| B cell receptor signaling | PPP3CB |
| B cell receptor signaling | PPP3CC |
| B cell receptor signaling | PPP3R1 |
| B cell receptor signaling | PPP3R2 |
| B cell receptor signaling | NFATC1 |
| B cell receptor signaling | NFATC2 |
| B cell receptor signaling | NFATC3 |
| B cell receptor signaling | GRB2 |
| B cell receptor signaling | SOS1 |
| B cell receptor signaling | SOS2 |
| B cell receptor signaling | RASGRP3 |
| B cell receptor signaling | HRAS |
| B cell receptor signaling | KRAS |
| B cell receptor signaling | NRAS |
| B cell receptor signaling | RAF1 |
| B cell receptor signaling | MAP2K1 |
| B cell receptor signaling | MAP2K2 |
| B cell receptor signaling | MAPK1 |
| B cell receptor signaling | MAPK3 |
| B cell receptor signaling | FOS |
| B cell receptor signaling | JUN |
| B cell receptor signaling | PRKCB |
| B cell receptor signaling | CARD11 |
| B cell receptor signaling | BCL10 |
| B cell receptor signaling | MALT1 |
| B cell receptor signaling | CHUK |
| B cell receptor signaling | IKBKB |
| B cell receptor signaling | IKBKG |
| B cell receptor signaling | NFKB1 |
| B cell receptor signaling | RELA |
| B cell receptor signaling | NFKBIA |
| B cell receptor signaling | NFKBIB |
| B cell receptor signaling | NFKBIE |
| B cell receptor signaling | IFITM1 |
| B cell receptor signaling | CD81 |
| B cell receptor signaling | CD19 |
| B cell receptor signaling | CR2 |
| B cell receptor signaling | PIK3R1 |
| B cell receptor signaling | PIK3R2 |
| B cell receptor signaling | PIK3R3 |
| B cell receptor signaling | PIK3CA |
| B cell receptor signaling | PIK3CD |
| B cell receptor signaling | PIK3CB |
| B cell receptor signaling | AKT1 |
| B cell receptor signaling | AKT2 |
| B cell receptor signaling | AKT3 |
| B cell receptor signaling | GSK3B |
| B cell receptor signaling | FCGR2B |
| B cell receptor signaling | INPP5D |
| B cell receptor signaling | INPPL1 |
| B cell receptor signaling | LILRB2 |
| B cell receptor signaling | LILRB1 |
| B cell receptor signaling | LILRB5 |
| B cell receptor signaling | LILRB4 |
| B cell receptor signaling | LILRA1 |
| B cell receptor signaling | LILRB3 |
| B cell receptor signaling | LILRA3 |
| B cell receptor signaling | LILRA2 |
| B cell receptor signaling | LILRA4 |
| B cell receptor signaling | LILRA6 |
| B cell receptor signaling | LILRA5 |
| B cell receptor signaling | LOC102725035 |
| B cell receptor signaling | CD22 |
| B cell receptor signaling | CD72 |
| B cell receptor signaling | PTPN6 |
| B cell receptor signaling | PIK3AP1 |
| Fc gamma R-mediated phagocytosis | IGH |
| Fc gamma R-mediated phagocytosis | FCGR1A |
| Fc gamma R-mediated phagocytosis | FCGR2A |
| Fc gamma R-mediated phagocytosis | FCGR3A |
| Fc gamma R-mediated phagocytosis | FCGR3B |
| Fc gamma R-mediated phagocytosis | PTPRC |
| Fc gamma R-mediated phagocytosis | HCK |
| Fc gamma R-mediated phagocytosis | LYN |
| Fc gamma R-mediated phagocytosis | SYK |
| Fc gamma R-mediated phagocytosis | PIK3CA |
| Fc gamma R-mediated phagocytosis | PIK3CD |
| Fc gamma R-mediated phagocytosis | PIK3CB |
| Fc gamma R-mediated phagocytosis | PIK3R1 |
| Fc gamma R-mediated phagocytosis | PIK3R2 |
| Fc gamma R-mediated phagocytosis | PIK3R3 |
| Fc gamma R-mediated phagocytosis | AKT1 |
| Fc gamma R-mediated phagocytosis | AKT2 |
| Fc gamma R-mediated phagocytosis | AKT3 |
| Fc gamma R-mediated phagocytosis | RPS6KB1 |
| Fc gamma R-mediated phagocytosis | RPS6KB2 |
| Fc gamma R-mediated phagocytosis | PLCG1 |
| Fc gamma R-mediated phagocytosis | PLCG2 |
| Fc gamma R-mediated phagocytosis | PRKCD |
| Fc gamma R-mediated phagocytosis | PRKCE |
| Fc gamma R-mediated phagocytosis | RAF1 |
| Fc gamma R-mediated phagocytosis | MAP2K1 |
| Fc gamma R-mediated phagocytosis | MAPK1 |
| Fc gamma R-mediated phagocytosis | MAPK3 |
| Fc gamma R-mediated phagocytosis | PLA2G4E |
| Fc gamma R-mediated phagocytosis | PLA2G4A |
| Fc gamma R-mediated phagocytosis | JMJD7-PLA2G4B |
| Fc gamma R-mediated phagocytosis | PLA2G4B |
| Fc gamma R-mediated phagocytosis | PLA2G4C |
| Fc gamma R-mediated phagocytosis | PLA2G4D |
| Fc gamma R-mediated phagocytosis | PLA2G4F |
| Fc gamma R-mediated phagocytosis | PLA2G6 |
| Fc gamma R-mediated phagocytosis | MARCKS |
| Fc gamma R-mediated phagocytosis | MARCKSL1 |
| Fc gamma R-mediated phagocytosis | PLD1 |
| Fc gamma R-mediated phagocytosis | PLD2 |
| Fc gamma R-mediated phagocytosis | PLPP1 |
| Fc gamma R-mediated phagocytosis | PLPP3 |
| Fc gamma R-mediated phagocytosis | PLPP2 |
| Fc gamma R-mediated phagocytosis | SPHK1 |
| Fc gamma R-mediated phagocytosis | SPHK2 |
| Fc gamma R-mediated phagocytosis | PRKCA |
| Fc gamma R-mediated phagocytosis | PRKCB |
| Fc gamma R-mediated phagocytosis | PRKCG |
| Fc gamma R-mediated phagocytosis | NCF1 |
| Fc gamma R-mediated phagocytosis | GSN |
| Fc gamma R-mediated phagocytosis | SCIN |
| Fc gamma R-mediated phagocytosis | VAV3 |
| Fc gamma R-mediated phagocytosis | VAV1 |
| Fc gamma R-mediated phagocytosis | VAV2 |
| Fc gamma R-mediated phagocytosis | CDC42 |
| Fc gamma R-mediated phagocytosis | WAS |
| Fc gamma R-mediated phagocytosis | VASP |
| Fc gamma R-mediated phagocytosis | ARPC5 |
| Fc gamma R-mediated phagocytosis | ARPC5L |
| Fc gamma R-mediated phagocytosis | ARPC4 |
| Fc gamma R-mediated phagocytosis | ARPC3 |
| Fc gamma R-mediated phagocytosis | ARPC1B |
| Fc gamma R-mediated phagocytosis | ARPC1A |
| Fc gamma R-mediated phagocytosis | ARPC2 |
| Fc gamma R-mediated phagocytosis | RAC1 |
| Fc gamma R-mediated phagocytosis | RAC2 |
| Fc gamma R-mediated phagocytosis | WASF1 |
| Fc gamma R-mediated phagocytosis | WASF2 |
| Fc gamma R-mediated phagocytosis | WASF3 |
| Fc gamma R-mediated phagocytosis | PAK1 |
| Fc gamma R-mediated phagocytosis | LIMK1 |
| Fc gamma R-mediated phagocytosis | LIMK2 |
| Fc gamma R-mediated phagocytosis | CFL1 |
| Fc gamma R-mediated phagocytosis | CFL2 |
| Fc gamma R-mediated phagocytosis | PIP5K1C |
| Fc gamma R-mediated phagocytosis | PIP5K1A |
| Fc gamma R-mediated phagocytosis | PIP5K1B |
| Fc gamma R-mediated phagocytosis | ARF6 |
| Fc gamma R-mediated phagocytosis | CRK |
| Fc gamma R-mediated phagocytosis | CRKL |
| Fc gamma R-mediated phagocytosis | DOCK1 |
| Fc gamma R-mediated phagocytosis | ASAP1 |
| Fc gamma R-mediated phagocytosis | ASAP3 |
| Fc gamma R-mediated phagocytosis | ASAP2 |
| Fc gamma R-mediated phagocytosis | FCGR2B |
| Fc gamma R-mediated phagocytosis | INPP5D |
| Fc gamma R-mediated phagocytosis | INPPL1 |
| Fc gamma R-mediated phagocytosis | GAB2 |
| Fc gamma R-mediated phagocytosis | LAT |
| Fc gamma R-mediated phagocytosis | DNM2 |
| Fc gamma R-mediated phagocytosis | AMPH |
| Fc gamma R-mediated phagocytosis | BIN1 |
| Fc gamma R-mediated phagocytosis | MYO10 |
| ECM-receptor interaction | COL1A1 |
| ECM-receptor interaction | COL1A2 |
| ECM-receptor interaction | COL2A1 |
| ECM-receptor interaction | COL4A2 |
| ECM-receptor interaction | COL4A4 |
| ECM-receptor interaction | COL4A6 |
| ECM-receptor interaction | COL4A1 |
| ECM-receptor interaction | COL4A5 |
| ECM-receptor interaction | COL4A3 |
| ECM-receptor interaction | COL6A1 |
| ECM-receptor interaction | COL6A2 |
| ECM-receptor interaction | COL6A3 |
| ECM-receptor interaction | COL6A6 |
| ECM-receptor interaction | COL6A5 |
| ECM-receptor interaction | COL9A1 |
| ECM-receptor interaction | COL9A2 |
| ECM-receptor interaction | COL9A3 |
| ECM-receptor interaction | LAMA1 |
| ECM-receptor interaction | LAMA2 |
| ECM-receptor interaction | LAMA3 |
| ECM-receptor interaction | LAMA5 |
| ECM-receptor interaction | LAMA4 |
| ECM-receptor interaction | LAMB1 |
| ECM-receptor interaction | LAMB2 |
| ECM-receptor interaction | LAMB3 |
| ECM-receptor interaction | LAMB4 |
| ECM-receptor interaction | LAMC1 |
| ECM-receptor interaction | LAMC2 |
| ECM-receptor interaction | LAMC3 |
| ECM-receptor interaction | CHAD |
| ECM-receptor interaction | RELN |
| ECM-receptor interaction | THBS1 |
| ECM-receptor interaction | COMP |
| ECM-receptor interaction | THBS2 |
| ECM-receptor interaction | THBS3 |
| ECM-receptor interaction | THBS4 |
| ECM-receptor interaction | FN1 |
| ECM-receptor interaction | SPP1 |
| ECM-receptor interaction | VTN |
| ECM-receptor interaction | TNC |
| ECM-receptor interaction | TNN |
| ECM-receptor interaction | TNR |
| ECM-receptor interaction | TNXB |
| ECM-receptor interaction | NPNT |
| ECM-receptor interaction | FRAS1 |
| ECM-receptor interaction | FREM2 |
| ECM-receptor interaction | FREM1 |
| ECM-receptor interaction | DSPP |
| ECM-receptor interaction | VWF |
| ECM-receptor interaction | IBSP |
| ECM-receptor interaction | DMP1 |
| ECM-receptor interaction | AGRN |
| ECM-receptor interaction | HSPG2 |
| ECM-receptor interaction | ITGA1 |
| ECM-receptor interaction | ITGA2 |
| ECM-receptor interaction | ITGA2B |
| ECM-receptor interaction | ITGA3 |
| ECM-receptor interaction | ITGA4 |
| ECM-receptor interaction | ITGA5 |
| ECM-receptor interaction | ITGA6 |
| ECM-receptor interaction | ITGA7 |
| ECM-receptor interaction | ITGA8 |
| ECM-receptor interaction | ITGA9 |
| ECM-receptor interaction | ITGA10 |
| ECM-receptor interaction | ITGA11 |
| ECM-receptor interaction | ITGAV |
| ECM-receptor interaction | ITGB1 |
| ECM-receptor interaction | ITGB3 |
| ECM-receptor interaction | ITGB4 |
| ECM-receptor interaction | ITGB5 |
| ECM-receptor interaction | ITGB6 |
| ECM-receptor interaction | ITGB7 |
| ECM-receptor interaction | ITGB8 |
| ECM-receptor interaction | CD44 |
| ECM-receptor interaction | SDC1 |
| ECM-receptor interaction | SDC4 |
| ECM-receptor interaction | SV2C |
| ECM-receptor interaction | SV2B |
| ECM-receptor interaction | SV2A |
| ECM-receptor interaction | CD36 |
| ECM-receptor interaction | GP5 |
| ECM-receptor interaction | GP1BA |
| ECM-receptor interaction | GP1BB |
| ECM-receptor interaction | GP9 |
| ECM-receptor interaction | GP6 |
| ECM-receptor interaction | DAG1 |
| ECM-receptor interaction | CD47 |
| ECM-receptor interaction | HMMR |
| Focal adhesion | COL1A1 |
| Focal adhesion | COL1A2 |
| Focal adhesion | COL2A1 |
| Focal adhesion | COL4A2 |
| Focal adhesion | COL4A4 |
| Focal adhesion | COL4A6 |
| Focal adhesion | COL4A1 |
| Focal adhesion | COL4A5 |
| Focal adhesion | COL4A3 |
| Focal adhesion | COL6A1 |
| Focal adhesion | COL6A2 |
| Focal adhesion | COL6A3 |
| Focal adhesion | COL6A6 |
| Focal adhesion | COL6A5 |
| Focal adhesion | COL9A1 |
| Focal adhesion | COL9A2 |
| Focal adhesion | COL9A3 |
| Focal adhesion | LAMA1 |
| Focal adhesion | LAMA2 |
| Focal adhesion | LAMA3 |
| Focal adhesion | LAMA5 |
| Focal adhesion | LAMA4 |
| Focal adhesion | LAMB1 |
| Focal adhesion | LAMB2 |
| Focal adhesion | LAMB3 |
| Focal adhesion | LAMB4 |
| Focal adhesion | LAMC1 |
| Focal adhesion | LAMC2 |
| Focal adhesion | LAMC3 |
| Focal adhesion | CHAD |
| Focal adhesion | RELN |
| Focal adhesion | THBS1 |
| Focal adhesion | COMP |
| Focal adhesion | THBS2 |
| Focal adhesion | THBS3 |
| Focal adhesion | THBS4 |
| Focal adhesion | FN1 |
| Focal adhesion | SPP1 |
| Focal adhesion | VTN |
| Focal adhesion | TNC |
| Focal adhesion | TNN |
| Focal adhesion | TNR |
| Focal adhesion | TNXB |
| Focal adhesion | VWF |
| Focal adhesion | IBSP |
| Focal adhesion | ITGA1 |
| Focal adhesion | ITGA2 |
| Focal adhesion | ITGA2B |
| Focal adhesion | ITGA3 |
| Focal adhesion | ITGA4 |
| Focal adhesion | ITGA5 |
| Focal adhesion | ITGA6 |
| Focal adhesion | ITGA7 |
| Focal adhesion | ITGA8 |
| Focal adhesion | ITGA9 |
| Focal adhesion | ITGA10 |
| Focal adhesion | ITGA11 |
| Focal adhesion | ITGAV |
| Focal adhesion | ITGB1 |
| Focal adhesion | ITGB3 |
| Focal adhesion | ITGB4 |
| Focal adhesion | ITGB5 |
| Focal adhesion | ITGB6 |
| Focal adhesion | ITGB7 |
| Focal adhesion | ITGB8 |
| Focal adhesion | PDGFA |
| Focal adhesion | PDGFB |
| Focal adhesion | PDGFC |
| Focal adhesion | PDGFD |
| Focal adhesion | EGF |
| Focal adhesion | IGF1 |
| Focal adhesion | VEGFA |
| Focal adhesion | VEGFB |
| Focal adhesion | PGF |
| Focal adhesion | VEGFC |
| Focal adhesion | VEGFD |
| Focal adhesion | HGF |
| Focal adhesion | PDGFRA |
| Focal adhesion | PDGFRB |
| Focal adhesion | IGF1R |
| Focal adhesion | KDR |
| Focal adhesion | EGFR |
| Focal adhesion | FLT1 |
| Focal adhesion | FLT4 |
| Focal adhesion | MET |
| Focal adhesion | ERBB2 |
| Focal adhesion | SRC |
| Focal adhesion | ARHGAP35 |
| Focal adhesion | ARHGAP5 |
| Focal adhesion | RHOA |
| Focal adhesion | DIAPH1 |
| Focal adhesion | ROCK1 |
| Focal adhesion | ROCK2 |
| Focal adhesion | MYL2 |
| Focal adhesion | MYL5 |
| Focal adhesion | MYL7 |
| Focal adhesion | MYL9 |
| Focal adhesion | MYL10 |
| Focal adhesion | MYL12B |
| Focal adhesion | MYL12A |
| Focal adhesion | MYLPF |
| Focal adhesion | PPP1CA |
| Focal adhesion | PPP1CB |
| Focal adhesion | PPP1CC |
| Focal adhesion | PPP1R12A |
| Focal adhesion | PPP1R12B |
| Focal adhesion | PPP1R12C |
| Focal adhesion | MYLK |
| Focal adhesion | MYLK2 |
| Focal adhesion | MYLK3 |
| Focal adhesion | MYLK4 |
| Focal adhesion | PIP5K1C |
| Focal adhesion | PIP5K1A |
| Focal adhesion | PIP5K1B |
| Focal adhesion | ACTG1 |
| Focal adhesion | ACTB |
| Focal adhesion | RASGRF1 |
| Focal adhesion | CAPN2 |
| Focal adhesion | ACTN1 |
| Focal adhesion | ACTN4 |
| Focal adhesion | TLN1 |
| Focal adhesion | TLN2 |
| Focal adhesion | FLNA |
| Focal adhesion | FLNC |
| Focal adhesion | FLNB |
| Focal adhesion | PXN |
| Focal adhesion | ILK |
| Focal adhesion | ZYX |
| Focal adhesion | VASP |
| Focal adhesion | VCL |
| Focal adhesion | PARVB |
| Focal adhesion | PARVA |
| Focal adhesion | PARVG |
| Focal adhesion | PDPK1 |
| Focal adhesion | AKT1 |
| Focal adhesion | AKT2 |
| Focal adhesion | AKT3 |
| Focal adhesion | GSK3B |
| Focal adhesion | CTNNB1 |
| Focal adhesion | PRKCA |
| Focal adhesion | PRKCB |
| Focal adhesion | PRKCG |
| Focal adhesion | PTK2 |
| Focal adhesion | PIK3CA |
| Focal adhesion | PIK3CD |
| Focal adhesion | PIK3CB |
| Focal adhesion | PIK3R1 |
| Focal adhesion | PIK3R2 |
| Focal adhesion | PIK3R3 |
| Focal adhesion | PTEN |
| Focal adhesion | VAV3 |
| Focal adhesion | VAV1 |
| Focal adhesion | VAV2 |
| Focal adhesion | RAC1 |
| Focal adhesion | RAC2 |
| Focal adhesion | RAC3 |
| Focal adhesion | PAK1 |
| Focal adhesion | PAK2 |
| Focal adhesion | PAK3 |
| Focal adhesion | PAK4 |
| Focal adhesion | PAK5 |
| Focal adhesion | PAK6 |
| Focal adhesion | BUB1B-PAK6 |
| Focal adhesion | CDC42 |
| Focal adhesion | BCAR1 |
| Focal adhesion | CRK |
| Focal adhesion | CRKL |
| Focal adhesion | DOCK1 |
| Focal adhesion | RAPGEF1 |
| Focal adhesion | RAP1A |
| Focal adhesion | RAP1B |
| Focal adhesion | MAPK8 |
| Focal adhesion | MAPK10 |
| Focal adhesion | MAPK9 |
| Focal adhesion | JUN |
| Focal adhesion | BRAF |
| Focal adhesion | CAV1 |
| Focal adhesion | CAV2 |
| Focal adhesion | CAV3 |
| Focal adhesion | FYN |
| Focal adhesion | SHC1 |
| Focal adhesion | SHC2 |
| Focal adhesion | SHC3 |
| Focal adhesion | SHC4 |
| Focal adhesion | GRB2 |
| Focal adhesion | SOS1 |
| Focal adhesion | SOS2 |
| Focal adhesion | HRAS |
| Focal adhesion | RAF1 |
| Focal adhesion | MAP2K1 |
| Focal adhesion | MAPK1 |
| Focal adhesion | MAPK3 |
| Focal adhesion | ELK1 |
| Focal adhesion | CCND1 |
| Focal adhesion | CCND2 |
| Focal adhesion | CCND3 |
| Focal adhesion | BIRC2 |
| Focal adhesion | BIRC3 |
| Focal adhesion | XIAP |
| Focal adhesion | BAD |
| Focal adhesion | BCL2 |
| Tight junction | CRB3 |
| Tight junction | CLDN4 |
| Tight junction | CLDN3 |
| Tight junction | CLDN7 |
| Tight junction | CLDN19 |
| Tight junction | CLDN16 |
| Tight junction | CLDN14 |
| Tight junction | CLDN15 |
| Tight junction | CLDN17 |
| Tight junction | CLDN20 |
| Tight junction | CLDN11 |
| Tight junction | CLDN18 |
| Tight junction | CLDN22 |
| Tight junction | CLDN5 |
| Tight junction | CLDN10 |
| Tight junction | CLDN8 |
| Tight junction | CLDN6 |
| Tight junction | CLDN2 |
| Tight junction | CLDN1 |
| Tight junction | CLDN9 |
| Tight junction | CLDN23 |
| Tight junction | CLDN34 |
| Tight junction | CLDN25 |
| Tight junction | CLDN24 |
| Tight junction | OCLN |
| Tight junction | F11R |
| Tight junction | JAM2 |
| Tight junction | JAM3 |
| Tight junction | BVES |
| Tight junction | CDC42 |
| Tight junction | PARD6A |
| Tight junction | PARD6G |
| Tight junction | PARD6B |
| Tight junction | MPP5 |
| Tight junction | MPP4 |
| Tight junction | TJP3 |
| Tight junction | PATJ |
| Tight junction | MPDZ |
| Tight junction | PRKCZ |
| Tight junction | PRKCI |
| Tight junction | AMOT |
| Tight junction | AMOTL1 |
| Tight junction | AMOTL2 |
| Tight junction | ARHGAP17 |
| Tight junction | RAC1 |
| Tight junction | NF2 |
| Tight junction | LLGL2 |
| Tight junction | LLGL1 |
| Tight junction | DLG1 |
| Tight junction | SCRIB |
| Tight junction | PPP2CA |
| Tight junction | PPP2CB |
| Tight junction | PPP2R1B |
| Tight junction | PPP2R1A |
| Tight junction | PPP2R2A |
| Tight junction | PPP2R2B |
| Tight junction | PPP2R2C |
| Tight junction | PPP2R2D |
| Tight junction | PARD3 |
| Tight junction | TIAM1 |
| Tight junction | TJP1 |
| Tight junction | TJAP1 |
| Tight junction | DLG2 |
| Tight junction | DLG3 |
| Tight junction | NEDD4 |
| Tight junction | NEDD4L |
| Tight junction | CGN |
| Tight junction | CGNL1 |
| Tight junction | ARHGEF2 |
| Tight junction | RHOA |
| Tight junction | GATA4 |
| Tight junction | MARVELD3 |
| Tight junction | MAP3K1 |
| Tight junction | MAPK8 |
| Tight junction | MAPK10 |
| Tight junction | MAPK9 |
| Tight junction | JUN |
| Tight junction | CD1A |
| Tight junction | CD1B |
| Tight junction | CD1C |
| Tight junction | CD1D |
| Tight junction | CD1E |
| Tight junction | CFTR |
| Tight junction | CDK4 |
| Tight junction | YBX3 |
| Tight junction | SYMPK |
| Tight junction | PCNA |
| Tight junction | CCND1 |
| Tight junction | ERBB2 |
| Tight junction | RUNX1 |
| Tight junction | HSPA4 |
| Tight junction | SLC9A3R1 |
| Tight junction | EZR |
| Tight junction | RDX |
| Tight junction | MSN |
| Tight junction | PRKCE |
| Tight junction | ACTG1 |
| Tight junction | ACTB |
| Tight junction | CACNA1D |
| Tight junction | MAP3K5 |
| Tight junction | MAP2K7 |
| Tight junction | SRC |
| Tight junction | CTTN |
| Tight junction | HCLS1 |
| Tight junction | ACTR2 |
| Tight junction | ACTR3B |
| Tight junction | ACTR3C |
| Tight junction | ACTR3 |
| Tight junction | WHAMM |
| Tight junction | WAS |
| Tight junction | VASP |
| Tight junction | PRKACA |
| Tight junction | PRKACB |
| Tight junction | PRKACG |
| Tight junction | RAB13 |
| Tight junction | ARHGEF18 |
| Tight junction | ROCK1 |
| Tight junction | ROCK2 |
| Tight junction | MYL2 |
| Tight junction | EPB41L4B |
| Tight junction | STK11 |
| Tight junction | PRKAA1 |
| Tight junction | PRKAA2 |
| Tight junction | PRKAB1 |
| Tight junction | PRKAB2 |
| Tight junction | PRKAG1 |
| Tight junction | PRKAG3 |
| Tight junction | PRKAG2 |
| Tight junction | MYH9 |
| Tight junction | MYH10 |
| Tight junction | MYH11 |
| Tight junction | MYH14 |
| Tight junction | MYL6B |
| Tight junction | MYL6 |
| Tight junction | MYL9 |
| Tight junction | MYL12B |
| Tight junction | MYL12A |
| Tight junction | IGSF5 |
| Tight junction | MAGI1 |
| Tight junction | SYNPO |
| Tight junction | ACTN1 |
| Tight junction | ACTN4 |
| Tight junction | MICALL2 |
| Tight junction | RAB8A |
| Tight junction | RAB8B |
| Tight junction | RAPGEF6 |
| Tight junction | RAP1A |
| Tight junction | ITGB1 |
| Tight junction | AFDN |
| Tight junction | TJP2 |
| Tight junction | RAPGEF2 |
| Tight junction | RAP2C |
| Tight junction | MARVELD2 |
| Tight junction | TUBA1B |
| Tight junction | TUBA4A |
| Tight junction | TUBA3C |
| Tight junction | TUBA1A |
| Tight junction | TUBA1C |
| Tight junction | TUBA8 |
| Tight junction | TUBA3E |
| Tight junction | TUBA3D |
| Tight junction | TUBAL3 |
| p53 signaling | ATM |
| p53 signaling | CHEK2 |
| p53 signaling | ATR |
| p53 signaling | CHEK1 |
| p53 signaling | GORAB |
| p53 signaling | CDKN2A |
| p53 signaling | MDM2 |
| p53 signaling | MDM4 |
| p53 signaling | TP53 |
| p53 signaling | CDKN1A |
| p53 signaling | CCND1 |
| p53 signaling | CCND2 |
| p53 signaling | CCND3 |
| p53 signaling | CDK4 |
| p53 signaling | CDK6 |
| p53 signaling | CCNE1 |
| p53 signaling | CCNE2 |
| p53 signaling | CDK2 |
| p53 signaling | SFN |
| p53 signaling | RPRM |
| p53 signaling | CCNB1 |
| p53 signaling | CCNB2 |
| p53 signaling | CDK1 |
| p53 signaling | GADD45A |
| p53 signaling | GADD45B |
| p53 signaling | GADD45G |
| p53 signaling | GTSE1 |
| p53 signaling | FAS |
| p53 signaling | PIDD1 |
| p53 signaling | TNFRSF10A |
| p53 signaling | TNFRSF10B |
| p53 signaling | CASP8 |
| p53 signaling | BID |
| p53 signaling | BAX |
| p53 signaling | PMAIP1 |
| p53 signaling | BBC3 |
| p53 signaling | TP53AIP1 |
| p53 signaling | SIVA1 |
| p53 signaling | BCL2L1 |
| p53 signaling | BCL2 |
| p53 signaling | TP53I3 |
| p53 signaling | EI24 |
| p53 signaling | SHISA5 |
| p53 signaling | PERP |
| p53 signaling | ZMAT3 |
| p53 signaling | SIAH1 |
| p53 signaling | CYCS |
| p53 signaling | APAF1 |
| p53 signaling | CASP9 |
| p53 signaling | CASP3 |
| p53 signaling | AIFM2 |
| p53 signaling | IGFBP3 |
| p53 signaling | IGF1 |
| p53 signaling | SERPINE1 |
| p53 signaling | ADGRB1 |
| p53 signaling | CD82 |
| p53 signaling | THBS1 |
| p53 signaling | SERPINB5 |
| p53 signaling | DDB2 |
| p53 signaling | RRM2B |
| p53 signaling | RRM2 |
| p53 signaling | SESN1 |
| p53 signaling | SESN3 |
| p53 signaling | SESN2 |
| p53 signaling | PTEN |
| p53 signaling | TSC2 |
| p53 signaling | STEAP3 |
| p53 signaling | COP1 |
| p53 signaling | RCHY1 |
| p53 signaling | CCNG1 |
| p53 signaling | CCNG2 |
| p53 signaling | PPM1D |
| p53 signaling | TP73 |
| Mismatch repair | SSBP1 |
| Mismatch repair | PMS2 |
| Mismatch repair | MLH1 |
| Mismatch repair | MSH6 |
| Mismatch repair | MSH2 |
| Mismatch repair | MSH3 |
| Mismatch repair | MLH3 |
| Mismatch repair | RFC1 |
| Mismatch repair | RFC4 |
| Mismatch repair | RFC2 |
| Mismatch repair | RFC5 |
| Mismatch repair | RFC3 |
| Mismatch repair | PCNA |
| Mismatch repair | EXO1 |
| Mismatch repair | RPA1 |
| Mismatch repair | RPA2 |
| Mismatch repair | RPA3 |
| Mismatch repair | RPA4 |
| Mismatch repair | POLD1 |
| Mismatch repair | POLD2 |
| Mismatch repair | POLD3 |
| Mismatch repair | POLD4 |
| Mismatch repair | LIG1 |
| Homologous recombination | SSBP1 |
| Homologous recombination | RAD50 |
| Homologous recombination | MRE11 |
| Homologous recombination | NBN |
| Homologous recombination | ATM |
| Homologous recombination | BRCA1 |
| Homologous recombination | BARD1 |
| Homologous recombination | RBBP8 |
| Homologous recombination | BRIP1 |
| Homologous recombination | TOPBP1 |
| Homologous recombination | ABRAXAS1 |
| Homologous recombination | UIMC1 |
| Homologous recombination | BABAM1 |
| Homologous recombination | BABAM2 |
| Homologous recombination | BRCC3 |
| Homologous recombination | PALB2 |
| Homologous recombination | BRCA2 |
| Homologous recombination | SEM1 |
| Homologous recombination | SYCP3 |
| Homologous recombination | RPA1 |
| Homologous recombination | RPA2 |
| Homologous recombination | RPA3 |
| Homologous recombination | RPA4 |
| Homologous recombination | RAD51 |
| Homologous recombination | RAD52 |
| Homologous recombination | RAD51B |
| Homologous recombination | RAD51C |
| Homologous recombination | RAD51D |
| Homologous recombination | XRCC2 |
| Homologous recombination | XRCC3 |
| Homologous recombination | RAD54L |
| Homologous recombination | RAD54B |
| Homologous recombination | POLD1 |
| Homologous recombination | POLD2 |
| Homologous recombination | POLD3 |
| Homologous recombination | POLD4 |
| Homologous recombination | BLM |
| Homologous recombination | TOP3A |
| Homologous recombination | TOP3B |
| Homologous recombination | MUS81 |
| Homologous recombination | EME1 |
| PI3K-Akt signaling | EGF |
| PI3K-Akt signaling | TGFA |
| PI3K-Akt signaling | EREG |
| PI3K-Akt signaling | AREG |
| PI3K-Akt signaling | FGF1 |
| PI3K-Akt signaling | FGF2 |
| PI3K-Akt signaling | FGF3 |
| PI3K-Akt signaling | FGF4 |
| PI3K-Akt signaling | FGF17 |
| PI3K-Akt signaling | FGF6 |
| PI3K-Akt signaling | FGF7 |
| PI3K-Akt signaling | FGF8 |
| PI3K-Akt signaling | FGF9 |
| PI3K-Akt signaling | FGF10 |
| PI3K-Akt signaling | FGF16 |
| PI3K-Akt signaling | FGF5 |
| PI3K-Akt signaling | FGF18 |
| PI3K-Akt signaling | FGF20 |
| PI3K-Akt signaling | FGF22 |
| PI3K-Akt signaling | FGF19 |
| PI3K-Akt signaling | FGF21 |
| PI3K-Akt signaling | FGF23 |
| PI3K-Akt signaling | NGF |
| PI3K-Akt signaling | BDNF |
| PI3K-Akt signaling | NTF3 |
| PI3K-Akt signaling | NTF4 |
| PI3K-Akt signaling | INS |
| PI3K-Akt signaling | IGF1 |
| PI3K-Akt signaling | IGF2 |
| PI3K-Akt signaling | PDGFA |
| PI3K-Akt signaling | PDGFB |
| PI3K-Akt signaling | PDGFC |
| PI3K-Akt signaling | PDGFD |
| PI3K-Akt signaling | CSF1 |
| PI3K-Akt signaling | KITLG |
| PI3K-Akt signaling | FLT3LG |
| PI3K-Akt signaling | VEGFA |
| PI3K-Akt signaling | VEGFB |
| PI3K-Akt signaling | PGF |
| PI3K-Akt signaling | VEGFC |
| PI3K-Akt signaling | VEGFD |
| PI3K-Akt signaling | HGF |
| PI3K-Akt signaling | ANGPT1 |
| PI3K-Akt signaling | ANGPT2 |
| PI3K-Akt signaling | ANGPT4 |
| PI3K-Akt signaling | EFNA1 |
| PI3K-Akt signaling | EFNA2 |
| PI3K-Akt signaling | EFNA3 |
| PI3K-Akt signaling | EFNA4 |
| PI3K-Akt signaling | EFNA5 |
| PI3K-Akt signaling | EGFR |
| PI3K-Akt signaling | ERBB2 |
| PI3K-Akt signaling | ERBB3 |
| PI3K-Akt signaling | ERBB4 |
| PI3K-Akt signaling | FGFR1 |
| PI3K-Akt signaling | FGFR2 |
| PI3K-Akt signaling | FGFR3 |
| PI3K-Akt signaling | FGFR4 |
| PI3K-Akt signaling | NGFR |
| PI3K-Akt signaling | NTRK1 |
| PI3K-Akt signaling | NTRK2 |
| PI3K-Akt signaling | INSR |
| PI3K-Akt signaling | IGF1R |
| PI3K-Akt signaling | PDGFRA |
| PI3K-Akt signaling | PDGFRB |
| PI3K-Akt signaling | CSF1R |
| PI3K-Akt signaling | KIT |
| PI3K-Akt signaling | FLT3 |
| PI3K-Akt signaling | FLT1 |
| PI3K-Akt signaling | FLT4 |
| PI3K-Akt signaling | KDR |
| PI3K-Akt signaling | MET |
| PI3K-Akt signaling | TEK |
| PI3K-Akt signaling | EPHA2 |
| PI3K-Akt signaling | GRB2 |
| PI3K-Akt signaling | SOS1 |
| PI3K-Akt signaling | SOS2 |
| PI3K-Akt signaling | HRAS |
| PI3K-Akt signaling | KRAS |
| PI3K-Akt signaling | NRAS |
| PI3K-Akt signaling | RAF1 |
| PI3K-Akt signaling | MAP2K1 |
| PI3K-Akt signaling | MAP2K2 |
| PI3K-Akt signaling | MAPK1 |
| PI3K-Akt signaling | MAPK3 |
| PI3K-Akt signaling | IRS1 |
| PI3K-Akt signaling | TLR2 |
| PI3K-Akt signaling | TLR4 |
| PI3K-Akt signaling | RAC1 |
| PI3K-Akt signaling | IGH |
| PI3K-Akt signaling | SYK |
| PI3K-Akt signaling | CD19 |
| PI3K-Akt signaling | PIK3AP1 |
| PI3K-Akt signaling | GH1 |
| PI3K-Akt signaling | GH2 |
| PI3K-Akt signaling | CSH1 |
| PI3K-Akt signaling | CSH2 |
| PI3K-Akt signaling | PRL |
| PI3K-Akt signaling | OSM |
| PI3K-Akt signaling | IL2 |
| PI3K-Akt signaling | IL3 |
| PI3K-Akt signaling | IL6 |
| PI3K-Akt signaling | IL4 |
| PI3K-Akt signaling | IL7 |
| PI3K-Akt signaling | IFNA1 |
| PI3K-Akt signaling | IFNA2 |
| PI3K-Akt signaling | IFNA4 |
| PI3K-Akt signaling | IFNA5 |
| PI3K-Akt signaling | IFNA6 |
| PI3K-Akt signaling | IFNA7 |
| PI3K-Akt signaling | IFNA8 |
| PI3K-Akt signaling | IFNA10 |
| PI3K-Akt signaling | IFNA13 |
| PI3K-Akt signaling | IFNA14 |
| PI3K-Akt signaling | IFNA16 |
| PI3K-Akt signaling | IFNA17 |
| PI3K-Akt signaling | IFNA21 |
| PI3K-Akt signaling | IFNB1 |
| PI3K-Akt signaling | EPO |
| PI3K-Akt signaling | CSF3 |
| PI3K-Akt signaling | GHR |
| PI3K-Akt signaling | PRLR |
| PI3K-Akt signaling | OSMR |
| PI3K-Akt signaling | IL2RA |
| PI3K-Akt signaling | IL2RB |
| PI3K-Akt signaling | IL2RG |
| PI3K-Akt signaling | IL3RA |
| PI3K-Akt signaling | IL6R |
| PI3K-Akt signaling | IL4R |
| PI3K-Akt signaling | IL7R |
| PI3K-Akt signaling | IFNAR1 |
| PI3K-Akt signaling | IFNAR2 |
| PI3K-Akt signaling | EPOR |
| PI3K-Akt signaling | CSF3R |
| PI3K-Akt signaling | JAK1 |
| PI3K-Akt signaling | JAK2 |
| PI3K-Akt signaling | JAK3 |
| PI3K-Akt signaling | COL1A1 |
| PI3K-Akt signaling | COL1A2 |
| PI3K-Akt signaling | COL2A1 |
| PI3K-Akt signaling | COL4A2 |
| PI3K-Akt signaling | COL4A4 |
| PI3K-Akt signaling | COL4A6 |
| PI3K-Akt signaling | COL4A1 |
| PI3K-Akt signaling | COL4A5 |
| PI3K-Akt signaling | COL4A3 |
| PI3K-Akt signaling | COL6A1 |
| PI3K-Akt signaling | COL6A2 |
| PI3K-Akt signaling | COL6A3 |
| PI3K-Akt signaling | COL6A6 |
| PI3K-Akt signaling | COL6A5 |
| PI3K-Akt signaling | COL9A1 |
| PI3K-Akt signaling | COL9A2 |
| PI3K-Akt signaling | COL9A3 |
| PI3K-Akt signaling | LAMA1 |
| PI3K-Akt signaling | LAMA2 |
| PI3K-Akt signaling | LAMA3 |
| PI3K-Akt signaling | LAMA5 |
| PI3K-Akt signaling | LAMA4 |
| PI3K-Akt signaling | LAMB1 |
| PI3K-Akt signaling | LAMB2 |
| PI3K-Akt signaling | LAMB3 |
| PI3K-Akt signaling | LAMB4 |
| PI3K-Akt signaling | LAMC1 |
| PI3K-Akt signaling | LAMC2 |
| PI3K-Akt signaling | LAMC3 |
| PI3K-Akt signaling | CHAD |
| PI3K-Akt signaling | RELN |
| PI3K-Akt signaling | THBS1 |
| PI3K-Akt signaling | COMP |
| PI3K-Akt signaling | THBS2 |
| PI3K-Akt signaling | THBS3 |
| PI3K-Akt signaling | THBS4 |
| PI3K-Akt signaling | FN1 |
| PI3K-Akt signaling | SPP1 |
| PI3K-Akt signaling | VTN |
| PI3K-Akt signaling | TNC |
| PI3K-Akt signaling | TNN |
| PI3K-Akt signaling | TNR |
| PI3K-Akt signaling | TNXB |
| PI3K-Akt signaling | VWF |
| PI3K-Akt signaling | IBSP |
| PI3K-Akt signaling | ITGA1 |
| PI3K-Akt signaling | ITGA2 |
| PI3K-Akt signaling | ITGA2B |
| PI3K-Akt signaling | ITGA3 |
| PI3K-Akt signaling | ITGA4 |
| PI3K-Akt signaling | ITGA5 |
| PI3K-Akt signaling | ITGA6 |
| PI3K-Akt signaling | ITGA7 |
| PI3K-Akt signaling | ITGA8 |
| PI3K-Akt signaling | ITGA9 |
| PI3K-Akt signaling | ITGA10 |
| PI3K-Akt signaling | ITGA11 |
| PI3K-Akt signaling | ITGAV |
| PI3K-Akt signaling | ITGB1 |
| PI3K-Akt signaling | ITGB3 |
| PI3K-Akt signaling | ITGB4 |
| PI3K-Akt signaling | ITGB5 |
| PI3K-Akt signaling | ITGB6 |
| PI3K-Akt signaling | ITGB7 |
| PI3K-Akt signaling | ITGB8 |
| PI3K-Akt signaling | PTK2 |
| PI3K-Akt signaling | PIK3CA |
| PI3K-Akt signaling | PIK3CD |
| PI3K-Akt signaling | PIK3CB |
| PI3K-Akt signaling | PIK3R1 |
| PI3K-Akt signaling | PIK3R2 |
| PI3K-Akt signaling | PIK3R3 |
| PI3K-Akt signaling | F2R |
| PI3K-Akt signaling | CHRM1 |
| PI3K-Akt signaling | CHRM2 |
| PI3K-Akt signaling | LPAR1 |
| PI3K-Akt signaling | LPAR2 |
| PI3K-Akt signaling | LPAR3 |
| PI3K-Akt signaling | LPAR4 |
| PI3K-Akt signaling | LPAR5 |
| PI3K-Akt signaling | LPAR6 |
| PI3K-Akt signaling | GNB1 |
| PI3K-Akt signaling | GNB2 |
| PI3K-Akt signaling | GNB3 |
| PI3K-Akt signaling | GNB4 |
| PI3K-Akt signaling | GNB5 |
| PI3K-Akt signaling | GNG2 |
| PI3K-Akt signaling | GNG3 |
| PI3K-Akt signaling | GNG4 |
| PI3K-Akt signaling | GNG5 |
| PI3K-Akt signaling | GNG7 |
| PI3K-Akt signaling | GNG8 |
| PI3K-Akt signaling | GNG10 |
| PI3K-Akt signaling | GNG11 |
| PI3K-Akt signaling | GNG12 |
| PI3K-Akt signaling | GNG13 |
| PI3K-Akt signaling | GNGT1 |
| PI3K-Akt signaling | GNGT2 |
| PI3K-Akt signaling | PIK3CG |
| PI3K-Akt signaling | PIK3R5 |
| PI3K-Akt signaling | PIK3R6 |
| PI3K-Akt signaling | PDPK1 |
| PI3K-Akt signaling | STK11 |
| PI3K-Akt signaling | PRKAA1 |
| PI3K-Akt signaling | PRKAA2 |
| PI3K-Akt signaling | DDIT4 |
| PI3K-Akt signaling | TSC1 |
| PI3K-Akt signaling | TSC2 |
| PI3K-Akt signaling | RHEB |
| PI3K-Akt signaling | MLST8 |
| PI3K-Akt signaling | MTOR |
| PI3K-Akt signaling | RPTOR |
| PI3K-Akt signaling | EIF4EBP1 |
| PI3K-Akt signaling | EIF4E |
| PI3K-Akt signaling | EIF4E2 |
| PI3K-Akt signaling | EIF4E1B |
| PI3K-Akt signaling | RPS6KB1 |
| PI3K-Akt signaling | RPS6KB2 |
| PI3K-Akt signaling | EIF4B |
| PI3K-Akt signaling | RPS6 |
| PI3K-Akt signaling | PRKCA |
| PI3K-Akt signaling | PKN1 |
| PI3K-Akt signaling | PKN2 |
| PI3K-Akt signaling | PKN3 |
| PI3K-Akt signaling | SGK1 |
| PI3K-Akt signaling | SGK2 |
| PI3K-Akt signaling | SGK3 |
| PI3K-Akt signaling | C8orf44-SGK3 |
| PI3K-Akt signaling | AKT1 |
| PI3K-Akt signaling | AKT2 |
| PI3K-Akt signaling | AKT3 |
| PI3K-Akt signaling | MAGI1 |
| PI3K-Akt signaling | MAGI2 |
| PI3K-Akt signaling | PTEN |
| PI3K-Akt signaling | THEM4 |
| PI3K-Akt signaling | PPP2CA |
| PI3K-Akt signaling | PPP2CB |
| PI3K-Akt signaling | PPP2R1B |
| PI3K-Akt signaling | PPP2R1A |
| PI3K-Akt signaling | PPP2R2A |
| PI3K-Akt signaling | PPP2R2B |
| PI3K-Akt signaling | PPP2R2C |
| PI3K-Akt signaling | PPP2R2D |
| PI3K-Akt signaling | PPP2R3B |
| PI3K-Akt signaling | PPP2R3C |
| PI3K-Akt signaling | PPP2R3A |
| PI3K-Akt signaling | PPP2R5B |
| PI3K-Akt signaling | PPP2R5C |
| PI3K-Akt signaling | PPP2R5D |
| PI3K-Akt signaling | PPP2R5E |
| PI3K-Akt signaling | PPP2R5A |
| PI3K-Akt signaling | HSP90AA1 |
| PI3K-Akt signaling | HSP90AB1 |
| PI3K-Akt signaling | HSP90B1 |
| PI3K-Akt signaling | CDC37 |
| PI3K-Akt signaling | CRTC2 |
| PI3K-Akt signaling | PHLPP1 |
| PI3K-Akt signaling | PHLPP2 |
| PI3K-Akt signaling | TCL1A |
| PI3K-Akt signaling | TCL1B |
| PI3K-Akt signaling | MTCP1 |
| PI3K-Akt signaling | NOS3 |
| PI3K-Akt signaling | BRCA1 |
| PI3K-Akt signaling | GSK3B |
| PI3K-Akt signaling | GYS2 |
| PI3K-Akt signaling | GYS1 |
| PI3K-Akt signaling | PCK1 |
| PI3K-Akt signaling | PCK2 |
| PI3K-Akt signaling | G6PC |
| PI3K-Akt signaling | G6PC2 |
| PI3K-Akt signaling | G6PC3 |
| PI3K-Akt signaling | MYC |
| PI3K-Akt signaling | CCND1 |
| PI3K-Akt signaling | CDKN1A |
| PI3K-Akt signaling | CDKN1B |
| PI3K-Akt signaling | CDK2 |
| PI3K-Akt signaling | CDK4 |
| PI3K-Akt signaling | CDK6 |
| PI3K-Akt signaling | CCND2 |
| PI3K-Akt signaling | CCND3 |
| PI3K-Akt signaling | CCNE1 |
| PI3K-Akt signaling | CCNE2 |
| PI3K-Akt signaling | FOXO3 |
| PI3K-Akt signaling | RBL2 |
| PI3K-Akt signaling | FASLG |
| PI3K-Akt signaling | BCL2L11 |
| PI3K-Akt signaling | YWHAZ |
| PI3K-Akt signaling | YWHAB |
| PI3K-Akt signaling | YWHAQ |
| PI3K-Akt signaling | YWHAE |
| PI3K-Akt signaling | YWHAH |
| PI3K-Akt signaling | YWHAG |
| PI3K-Akt signaling | BAD |
| PI3K-Akt signaling | BCL2L1 |
| PI3K-Akt signaling | BCL2 |
| PI3K-Akt signaling | CASP9 |
| PI3K-Akt signaling | CREB1 |
| PI3K-Akt signaling | ATF2 |
| PI3K-Akt signaling | ATF4 |
| PI3K-Akt signaling | CREB3 |
| PI3K-Akt signaling | CREB3L1 |
| PI3K-Akt signaling | CREB3L2 |
| PI3K-Akt signaling | CREB3L3 |
| PI3K-Akt signaling | CREB3L4 |
| PI3K-Akt signaling | CREB5 |
| PI3K-Akt signaling | ATF6B |
| PI3K-Akt signaling | MCL1 |
| PI3K-Akt signaling | RXRA |
| PI3K-Akt signaling | NR4A1 |
| PI3K-Akt signaling | IKBKG |
| PI3K-Akt signaling | CHUK |
| PI3K-Akt signaling | IKBKB |
| PI3K-Akt signaling | RELA |
| PI3K-Akt signaling | NFKB1 |
| PI3K-Akt signaling | MYB |
| PI3K-Akt signaling | MDM2 |
| PI3K-Akt signaling | TP53 |
| Wnt signaling | PORCN |
| Wnt signaling | WNT1 |
| Wnt signaling | WNT2 |
| Wnt signaling | WNT2B |
| Wnt signaling | WNT3 |
| Wnt signaling | WNT3A |
| Wnt signaling | WNT4 |
| Wnt signaling | WNT5A |
| Wnt signaling | WNT5B |
| Wnt signaling | WNT6 |
| Wnt signaling | WNT7A |
| Wnt signaling | WNT7B |
| Wnt signaling | WNT8A |
| Wnt signaling | WNT8B |
| Wnt signaling | WNT9A |
| Wnt signaling | WNT9B |
| Wnt signaling | WNT10B |
| Wnt signaling | WNT10A |
| Wnt signaling | WNT11 |
| Wnt signaling | WNT16 |
| Wnt signaling | CER1 |
| Wnt signaling | NOTUM |
| Wnt signaling | WIF1 |
| Wnt signaling | SERPINF1 |
| Wnt signaling | SOST |
| Wnt signaling | DKK1 |
| Wnt signaling | DKK2 |
| Wnt signaling | DKK4 |
| Wnt signaling | SFRP1 |
| Wnt signaling | SFRP2 |
| Wnt signaling | SFRP4 |
| Wnt signaling | SFRP5 |
| Wnt signaling | RSPO1 |
| Wnt signaling | RSPO2 |
| Wnt signaling | RSPO3 |
| Wnt signaling | RSPO4 |
| Wnt signaling | LGR4 |
| Wnt signaling | LGR5 |
| Wnt signaling | LGR6 |
| Wnt signaling | RNF43 |
| Wnt signaling | ZNRF3 |
| Wnt signaling | FZD1 |
| Wnt signaling | FZD7 |
| Wnt signaling | FZD2 |
| Wnt signaling | FZD3 |
| Wnt signaling | FZD4 |
| Wnt signaling | FZD5 |
| Wnt signaling | FZD8 |
| Wnt signaling | FZD6 |
| Wnt signaling | FZD10 |
| Wnt signaling | FZD9 |
| Wnt signaling | LRP5 |
| Wnt signaling | LRP6 |
| Wnt signaling | BAMBI |
| Wnt signaling | CSNK1E |
| Wnt signaling | TPTEP2-CSNK1E |
| Wnt signaling | DVL3 |
| Wnt signaling | DVL2 |
| Wnt signaling | DVL1 |
| Wnt signaling | FRAT1 |
| Wnt signaling | FRAT2 |
| Wnt signaling | CSNK2A1 |
| Wnt signaling | CSNK2A2 |
| Wnt signaling | CSNK2A3 |
| Wnt signaling | CSNK2B |
| Wnt signaling | NKD1 |
| Wnt signaling | NKD2 |
| Wnt signaling | CXXC4 |
| Wnt signaling | SENP2 |
| Wnt signaling | GSK3B |
| Wnt signaling | CTNNB1 |
| Wnt signaling | AXIN1 |
| Wnt signaling | AXIN2 |
| Wnt signaling | APC |
| Wnt signaling | APC2 |
| Wnt signaling | CSNK1A1L |
| Wnt signaling | CSNK1A1 |
| Wnt signaling | TCF7 |
| Wnt signaling | TCF7L1 |
| Wnt signaling | TCF7L2 |
| Wnt signaling | LEF1 |
| Wnt signaling | CTNNBIP1 |
| Wnt signaling | CBY1 |
| Wnt signaling | CHD8 |
| Wnt signaling | SOX17 |
| Wnt signaling | CTBP1 |
| Wnt signaling | CTBP2 |
| Wnt signaling | CTNND2 |
| Wnt signaling | CREBBP |
| Wnt signaling | EP300 |
| Wnt signaling | RUVBL1 |
| Wnt signaling | SMAD4 |
| Wnt signaling | SMAD3 |
| Wnt signaling | MAP3K7 |
| Wnt signaling | NLK |
| Wnt signaling | MYC |
| Wnt signaling | JUN |
| Wnt signaling | FOSL1 |
| Wnt signaling | CCND1 |
| Wnt signaling | CCND2 |
| Wnt signaling | CCND3 |
| Wnt signaling | CCN4 |
| Wnt signaling | PPARD |
| Wnt signaling | MMP7 |
| Wnt signaling | PSEN1 |
| Wnt signaling | PRKACA |
| Wnt signaling | PRKACB |
| Wnt signaling | PRKACG |
| Wnt signaling | TP53 |
| Wnt signaling | SIAH1 |
| Wnt signaling | CACYBP |
| Wnt signaling | SKP1 |
| Wnt signaling | TBL1X |
| Wnt signaling | TBL1Y |
| Wnt signaling | TBL1XR1 |
| Wnt signaling | BTRC |
| Wnt signaling | FBXW11 |
| Wnt signaling | CUL1 |
| Wnt signaling | RBX1 |
| Wnt signaling | GPC4 |
| Wnt signaling | ROR1 |
| Wnt signaling | ROR2 |
| Wnt signaling | RYK |
| Wnt signaling | VANGL2 |
| Wnt signaling | VANGL1 |
| Wnt signaling | PRICKLE1 |
| Wnt signaling | PRICKLE2 |
| Wnt signaling | PRICKLE4 |
| Wnt signaling | PRICKLE3 |
| Wnt signaling | INVS |
| Wnt signaling | DAAM1 |
| Wnt signaling | DAAM2 |
| Wnt signaling | RHOA |
| Wnt signaling | ROCK2 |
| Wnt signaling | RAC1 |
| Wnt signaling | RAC2 |
| Wnt signaling | RAC3 |
| Wnt signaling | MAPK8 |
| Wnt signaling | MAPK10 |
| Wnt signaling | MAPK9 |
| Wnt signaling | PLCB1 |
| Wnt signaling | PLCB2 |
| Wnt signaling | PLCB3 |
| Wnt signaling | PLCB4 |
| Wnt signaling | CAMK2A |
| Wnt signaling | CAMK2D |
| Wnt signaling | CAMK2B |
| Wnt signaling | CAMK2G |
| Wnt signaling | PPP3CA |
| Wnt signaling | PPP3CB |
| Wnt signaling | PPP3CC |
| Wnt signaling | PPP3R1 |
| Wnt signaling | PPP3R2 |
| Wnt signaling | PRKCA |
| Wnt signaling | PRKCB |
| Wnt signaling | PRKCG |
| Wnt signaling | NFATC1 |
| Wnt signaling | NFATC2 |
| Wnt signaling | NFATC3 |
| Wnt signaling | NFATC4 |
| TGF-beta signaling | CHRD |
| TGF-beta signaling | NOG |
| TGF-beta signaling | NBL1 |
| TGF-beta signaling | MICOS10-NBL1 |
| TGF-beta signaling | GREM1 |
| TGF-beta signaling | GREM2 |
| TGF-beta signaling | THBS1 |
| TGF-beta signaling | DCN |
| TGF-beta signaling | FMOD |
| TGF-beta signaling | LEFTY1 |
| TGF-beta signaling | LEFTY2 |
| TGF-beta signaling | FST |
| TGF-beta signaling | BMP2 |
| TGF-beta signaling | BMP4 |
| TGF-beta signaling | BMP6 |
| TGF-beta signaling | INHBB |
| TGF-beta signaling | BMP5 |
| TGF-beta signaling | BMP7 |
| TGF-beta signaling | BMP8B |
| TGF-beta signaling | BMP8A |
| TGF-beta signaling | GDF5 |
| TGF-beta signaling | GDF6 |
| TGF-beta signaling | GDF7 |
| TGF-beta signaling | AMH |
| TGF-beta signaling | THSD4 |
| TGF-beta signaling | FBN1 |
| TGF-beta signaling | LTBP1 |
| TGF-beta signaling | TGFB1 |
| TGF-beta signaling | TGFB2 |
| TGF-beta signaling | TGFB3 |
| TGF-beta signaling | INHBA |
| TGF-beta signaling | INHBC |
| TGF-beta signaling | INHBE |
| TGF-beta signaling | NODAL |
| TGF-beta signaling | NEO1 |
| TGF-beta signaling | HJV |
| TGF-beta signaling | BMPR1A |
| TGF-beta signaling | BMPR1B |
| TGF-beta signaling | ACVR1 |
| TGF-beta signaling | BMPR2 |
| TGF-beta signaling | ACVR2A |
| TGF-beta signaling | RGMA |
| TGF-beta signaling | RGMB |
| TGF-beta signaling | AMHR2 |
| TGF-beta signaling | TGFBR1 |
| TGF-beta signaling | TGFBR2 |
| TGF-beta signaling | ACVR1B |
| TGF-beta signaling | ACVR2B |
| TGF-beta signaling | ACVR1C |
| TGF-beta signaling | BAMBI |
| TGF-beta signaling | SMAD1 |
| TGF-beta signaling | SMAD5 |
| TGF-beta signaling | SMAD9 |
| TGF-beta signaling | SMAD2 |
| TGF-beta signaling | SMAD3 |
| TGF-beta signaling | SMAD4 |
| TGF-beta signaling | SMAD6 |
| TGF-beta signaling | SMAD7 |
| TGF-beta signaling | SMURF1 |
| TGF-beta signaling | SMURF2 |
| TGF-beta signaling | ZFYVE9 |
| TGF-beta signaling | ZFYVE16 |
| TGF-beta signaling | HAMP |
| TGF-beta signaling | ID1 |
| TGF-beta signaling | ID2 |
| TGF-beta signaling | ID3 |
| TGF-beta signaling | ID4 |
| TGF-beta signaling | RBL1 |
| TGF-beta signaling | E2F4 |
| TGF-beta signaling | E2F5 |
| TGF-beta signaling | TFDP1 |
| TGF-beta signaling | CREBBP |
| TGF-beta signaling | EP300 |
| TGF-beta signaling | SP1 |
| TGF-beta signaling | TGIF1 |
| TGF-beta signaling | TGIF2 |
| TGF-beta signaling | MYC |
| TGF-beta signaling | CDKN2B |
| TGF-beta signaling | PITX2 |
| TGF-beta signaling | RBX1 |
| TGF-beta signaling | CUL1 |
| TGF-beta signaling | SKP1 |
| TGF-beta signaling | MAPK1 |
| TGF-beta signaling | MAPK3 |
| TGF-beta signaling | IFNG |
| TGF-beta signaling | TNF |
| TGF-beta signaling | RHOA |
| TGF-beta signaling | ROCK1 |
| TGF-beta signaling | PPP2R1B |
| TGF-beta signaling | PPP2R1A |
| TGF-beta signaling | PPP2CA |
| TGF-beta signaling | PPP2CB |
| TGF-beta signaling | RPS6KB1 |
| TGF-beta signaling | RPS6KB2 |
| Cell cycle | CCND1 |
| Cell cycle | CCND2 |
| Cell cycle | CCND3 |
| Cell cycle | CDK4 |
| Cell cycle | CDK6 |
| Cell cycle | RB1 |
| Cell cycle | RBL1 |
| Cell cycle | RBL2 |
| Cell cycle | ABL1 |
| Cell cycle | HDAC1 |
| Cell cycle | HDAC2 |
| Cell cycle | E2F1 |
| Cell cycle | E2F2 |
| Cell cycle | E2F3 |
| Cell cycle | E2F4 |
| Cell cycle | E2F5 |
| Cell cycle | TFDP1 |
| Cell cycle | TFDP2 |
| Cell cycle | GSK3B |
| Cell cycle | TGFB1 |
| Cell cycle | TGFB2 |
| Cell cycle | TGFB3 |
| Cell cycle | SMAD2 |
| Cell cycle | SMAD3 |
| Cell cycle | SMAD4 |
| Cell cycle | MYC |
| Cell cycle | ZBTB17 |
| Cell cycle | CDKN2A |
| Cell cycle | CDKN2B |
| Cell cycle | CDKN2C |
| Cell cycle | CDKN2D |
| Cell cycle | CDKN1B |
| Cell cycle | CDKN1C |
| Cell cycle | CDKN1A |
| Cell cycle | CCNE1 |
| Cell cycle | CCNE2 |
| Cell cycle | CDK2 |
| Cell cycle | SKP1 |
| Cell cycle | CUL1 |
| Cell cycle | RBX1 |
| Cell cycle | SKP2 |
| Cell cycle | CCNA2 |
| Cell cycle | CCNA1 |
| Cell cycle | CDC6 |
| Cell cycle | CDC45 |
| Cell cycle | CDC7 |
| Cell cycle | DBF4 |
| Cell cycle | CDK1 |
| Cell cycle | CCNB1 |
| Cell cycle | CCNB2 |
| Cell cycle | CCNB3 |
| Cell cycle | CDC25B |
| Cell cycle | CDC25C |
| Cell cycle | YWHAZ |
| Cell cycle | YWHAB |
| Cell cycle | YWHAQ |
| Cell cycle | YWHAE |
| Cell cycle | YWHAH |
| Cell cycle | YWHAG |
| Cell cycle | PLK1 |
| Cell cycle | WEE1 |
| Cell cycle | WEE2 |
| Cell cycle | PKMYT1 |
| Cell cycle | CCNH |
| Cell cycle | CDK7 |
| Cell cycle | ANAPC1 |
| Cell cycle | ANAPC2 |
| Cell cycle | CDC27 |
| Cell cycle | ANAPC4 |
| Cell cycle | ANAPC5 |
| Cell cycle | CDC16 |
| Cell cycle | ANAPC7 |
| Cell cycle | CDC23 |
| Cell cycle | ANAPC10 |
| Cell cycle | ANAPC11 |
| Cell cycle | CDC26 |
| Cell cycle | ANAPC13 |
| Cell cycle | CDC20 |
| Cell cycle | PTTG1 |
| Cell cycle | PTTG2 |
| Cell cycle | ESPL1 |
| Cell cycle | SMC1A |
| Cell cycle | SMC1B |
| Cell cycle | SMC3 |
| Cell cycle | STAG2 |
| Cell cycle | STAG1 |
| Cell cycle | RAD21 |
| Cell cycle | TTK |
| Cell cycle | BUB1 |
| Cell cycle | BUB3 |
| Cell cycle | BUB1B |
| Cell cycle | MAD1L1 |
| Cell cycle | MAD2L1 |
| Cell cycle | MAD2L2 |
| Cell cycle | FZR1 |
| Cell cycle | CDC14B |
| Cell cycle | CDC14A |
| Cell cycle | ATR |
| Cell cycle | ATM |
| Cell cycle | TP53 |
| Cell cycle | CHEK1 |
| Cell cycle | CHEK2 |
| Cell cycle | CREBBP |
| Cell cycle | EP300 |
| Cell cycle | PRKDC |
| Cell cycle | MDM2 |
| Cell cycle | GADD45A |
| Cell cycle | GADD45B |
| Cell cycle | GADD45G |
| Cell cycle | PCNA |
| Cell cycle | SFN |
| Cell cycle | CDC25A |
| Cell cycle | ORC1 |
| Cell cycle | ORC2 |
| Cell cycle | ORC3 |
| Cell cycle | ORC4 |
| Cell cycle | ORC5 |
| Cell cycle | ORC6 |
| Cell cycle | MCM2 |
| Cell cycle | MCM3 |
| Cell cycle | MCM4 |
| Cell cycle | MCM5 |
| Cell cycle | MCM6 |
| Cell cycle | MCM7 |
|  |  |
